# Supplementary material for: (NHC)Ni(ii)-catalyzed regioselective hydroalkenylation of norbornene derivatives: fine-tuning of NHC ligands and donor alkenes
Source: Royal Society of Chemistry journal article supplement (doi:10.1039/d4cc03258f), 2024-01-01
Supplement: d4cc03258f2.pdf [file d4cc03258f2.pdf]

## Synthesis of L6·HBF<sub>4</sub>

| Parameter               | Value               |
|-------------------------|---------------------|
| Title                   | YM-20210316-2.1.fid |
| Comment                 |                     |
| Origin                  | Bruker BioSpin GmbH |
| Owner                   | nmr                 |
| Site                    |                     |
| Instrument              | spect               |
| Solvent                 | CDC13               |
| Temperature             | 296.1               |
| Pulse Sequence          | zg30                |
| Experiment              | 1D                  |
| Number of Scans         | 16                  |
| Receiver Gain           | 111.4               |
| Relaxation Delay        | 1.0000              |
| Pulse Width             | 9.1500              |
| Presaturation Frequency |                     |
| Acquisition Time        | 1.9999              |
| Acquisition Date        | 2021-03-16T11:28:42 |
| Modification Date       | 2021-03-16T12:43:33 |
| Spectrometer Frequency  | 400.13              |
| Spectral Width          | 8012.8              |
| Lowest Frequency        | -1545.0             |
| Nucleus                 | <sup>1</sup> H      |
| Acquired Size           | 16025               |
| Spectral Size           | 65536               |

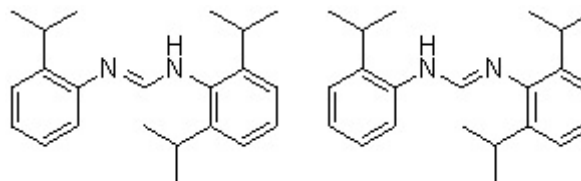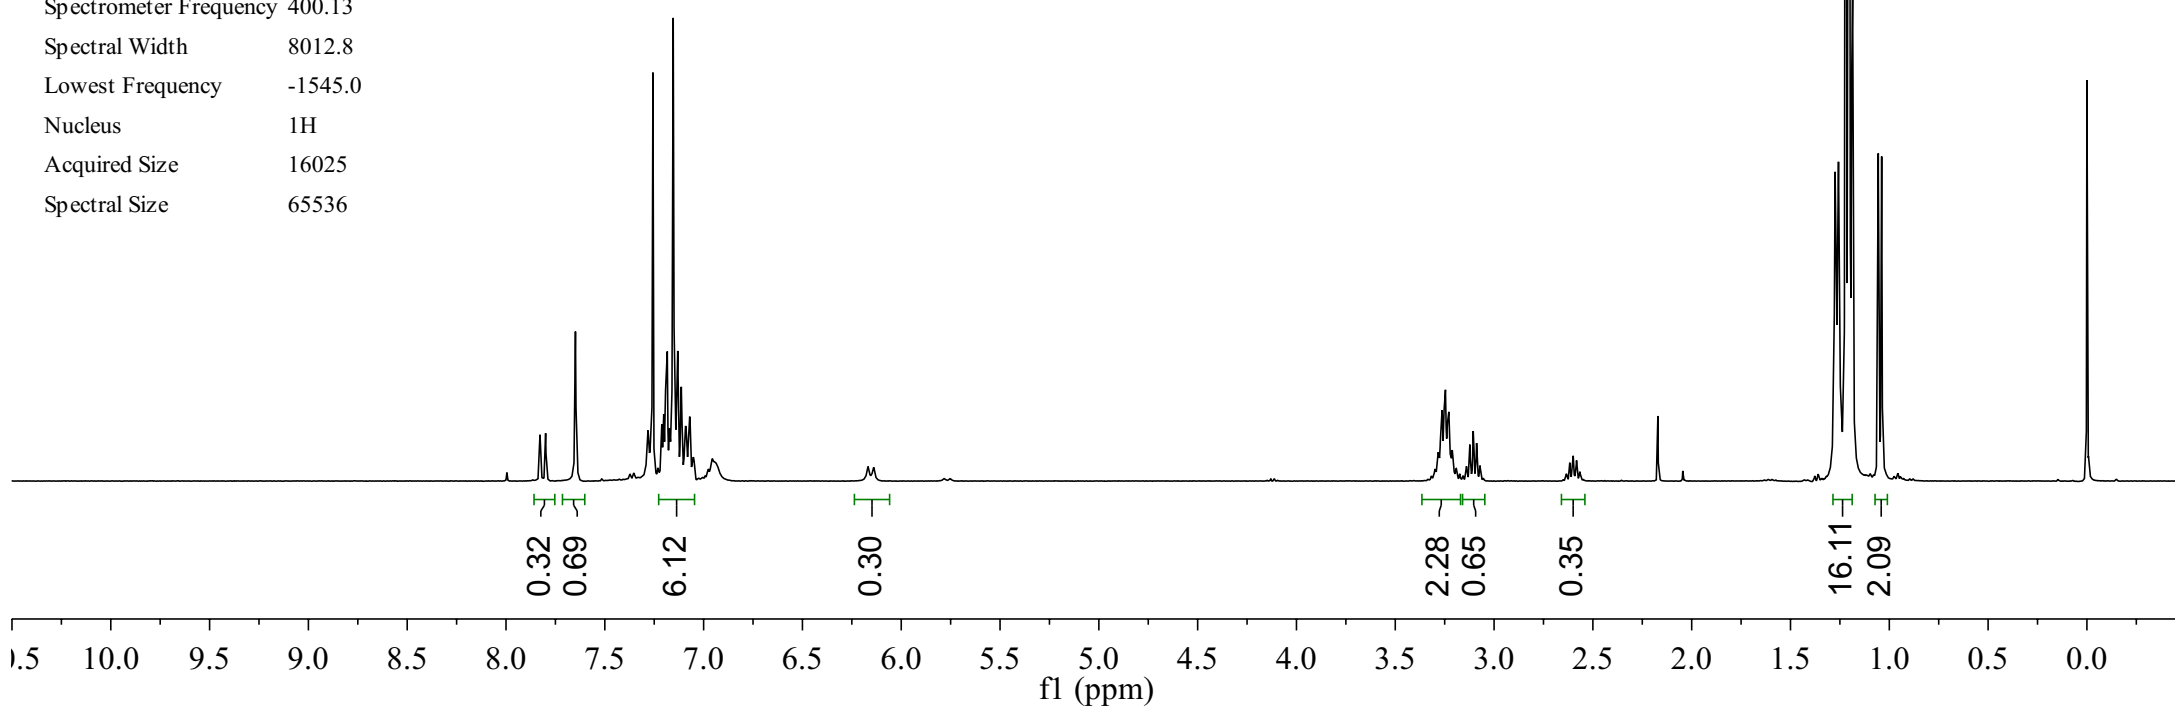

151.0  
148.9  
146.2  
145.8  
144.4  
142.7  
142.6  
140.9  
139.0  
137.5  
136.3  
133.5  
128.0  
127.0  
127.0  
126.9  
126.7  
126.7  
126.6  
126.5  
126.4  
126.3  
125.8  
125.5  
125.2  
124.4  
124.2  
124.1  
123.9  
123.8  
123.8  
123.6  
123.4  
121.0  
119.1  
118.7  
118.1  
115.9  
28.4  
28.2  
28.2  
28.0  
28.0  
27.9  
27.8  
27.7  
27.7  
23.9  
23.8  
23.7  
23.5  
23.2  
23.0  
22.6  
22.6  
22.4

| Parameter               | Value               |
|-------------------------|---------------------|
| Title                   | YM-20240627-1.3.fid |
| Comment                 | L3 zhong            |
| Origin                  | Bruker BioSpin GmbH |
| Owner                   | nmr                 |
| Site                    |                     |
| Instrument              | spect               |
| Solvent                 | CDCl3               |
| Temperature             | 296.1               |
| Pulse Sequence          | zgp30               |
| Experiment              | 1D                  |
| Number of Scans         | 485                 |
| Receiver Gain           | 193.1               |
| Relaxation Delay        | 2.0000              |
| Pulse Width             | 9.9400              |
| Presaturation Frequency |                     |
| Acquisition Time        | 1.1010              |
| Acquisition Date        | 2024-06-28T03:28:00 |
| Modification Date       | 2024-06-28T05:05:10 |
| Spectrometer Frequency  | 125.77              |
| Spectral Width          | 29761.9             |
| Lowest Frequency        | -2295.5             |
| Nucleus                 | 13C                 |
| Acquired Size           | 32768               |
| Spectral Size           | 65536               |

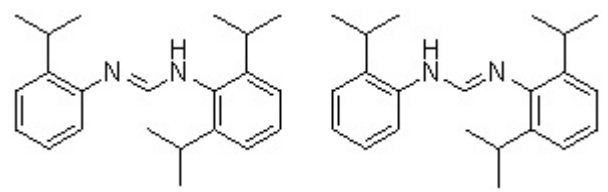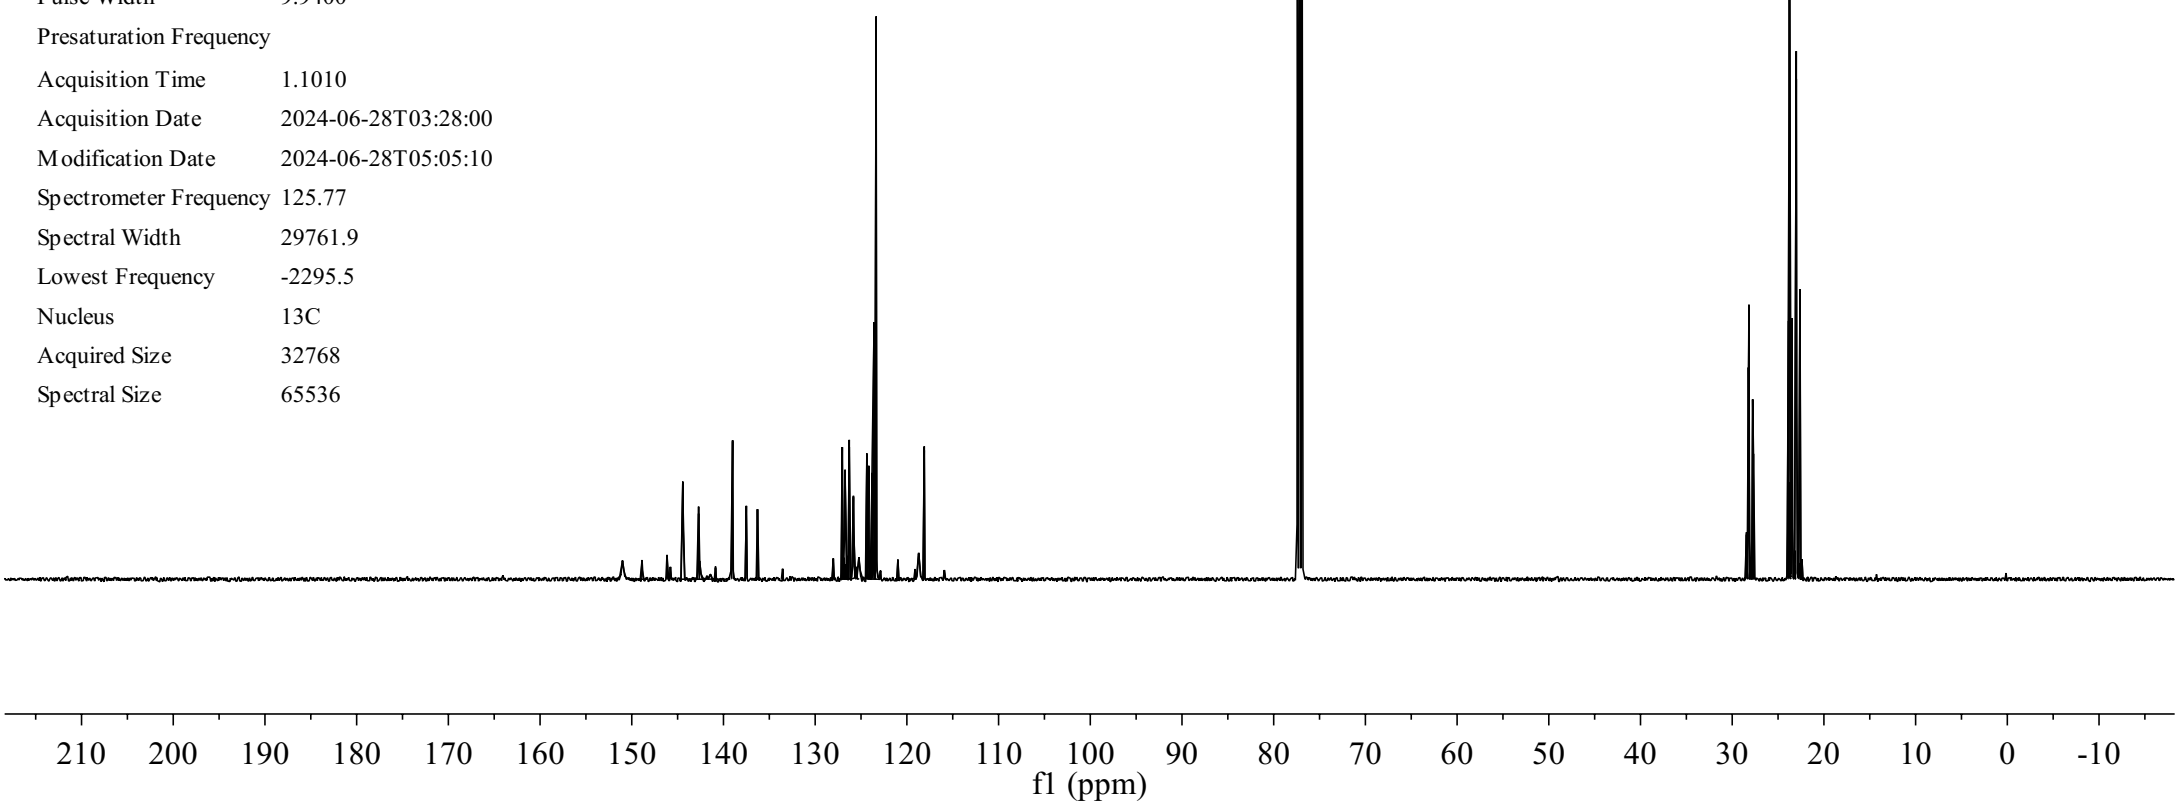

XJWJ1759-H66.1.fid

XJWJ1759-H66

| Parameter               | Value               |
|-------------------------|---------------------|
| Title                   | XJWJ1759-H66.1.fid  |
| Comment                 | XJWJ1759-H66        |
| Origin                  | Bruker BioSpin GmbH |
| Owner                   | nmr                 |
| Site                    |                     |
| Instrument              | spect               |
| Solvent                 | CDC13               |
| Temperature             | 294.1               |
| Pulse Sequence          | zg30                |
| Experiment              | 1D                  |
| Number of Scans         | 16                  |
| Receiver Gain           | 97.6                |
| Relaxation Delay        | 1.0000              |
| Pulse Width             | 9.1500              |
| Presaturation Frequency |                     |
| Acquisition Time        | 3.2768              |
| Acquisition Date        | 2021-11-01T20:04:00 |
| Modification Date       | 2024-06-26T23:12:58 |
| Spectrometer Frequency  | 400.13              |
| Spectral Width          | 8012.8              |
| Lowest Frequency        | -1545.1             |
| Nucleus                 | <sup>1</sup> H      |
| Acquired Size           | 16025               |
| Spectral Size           | 65536               |

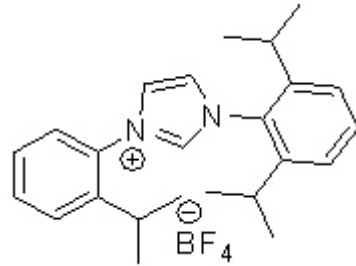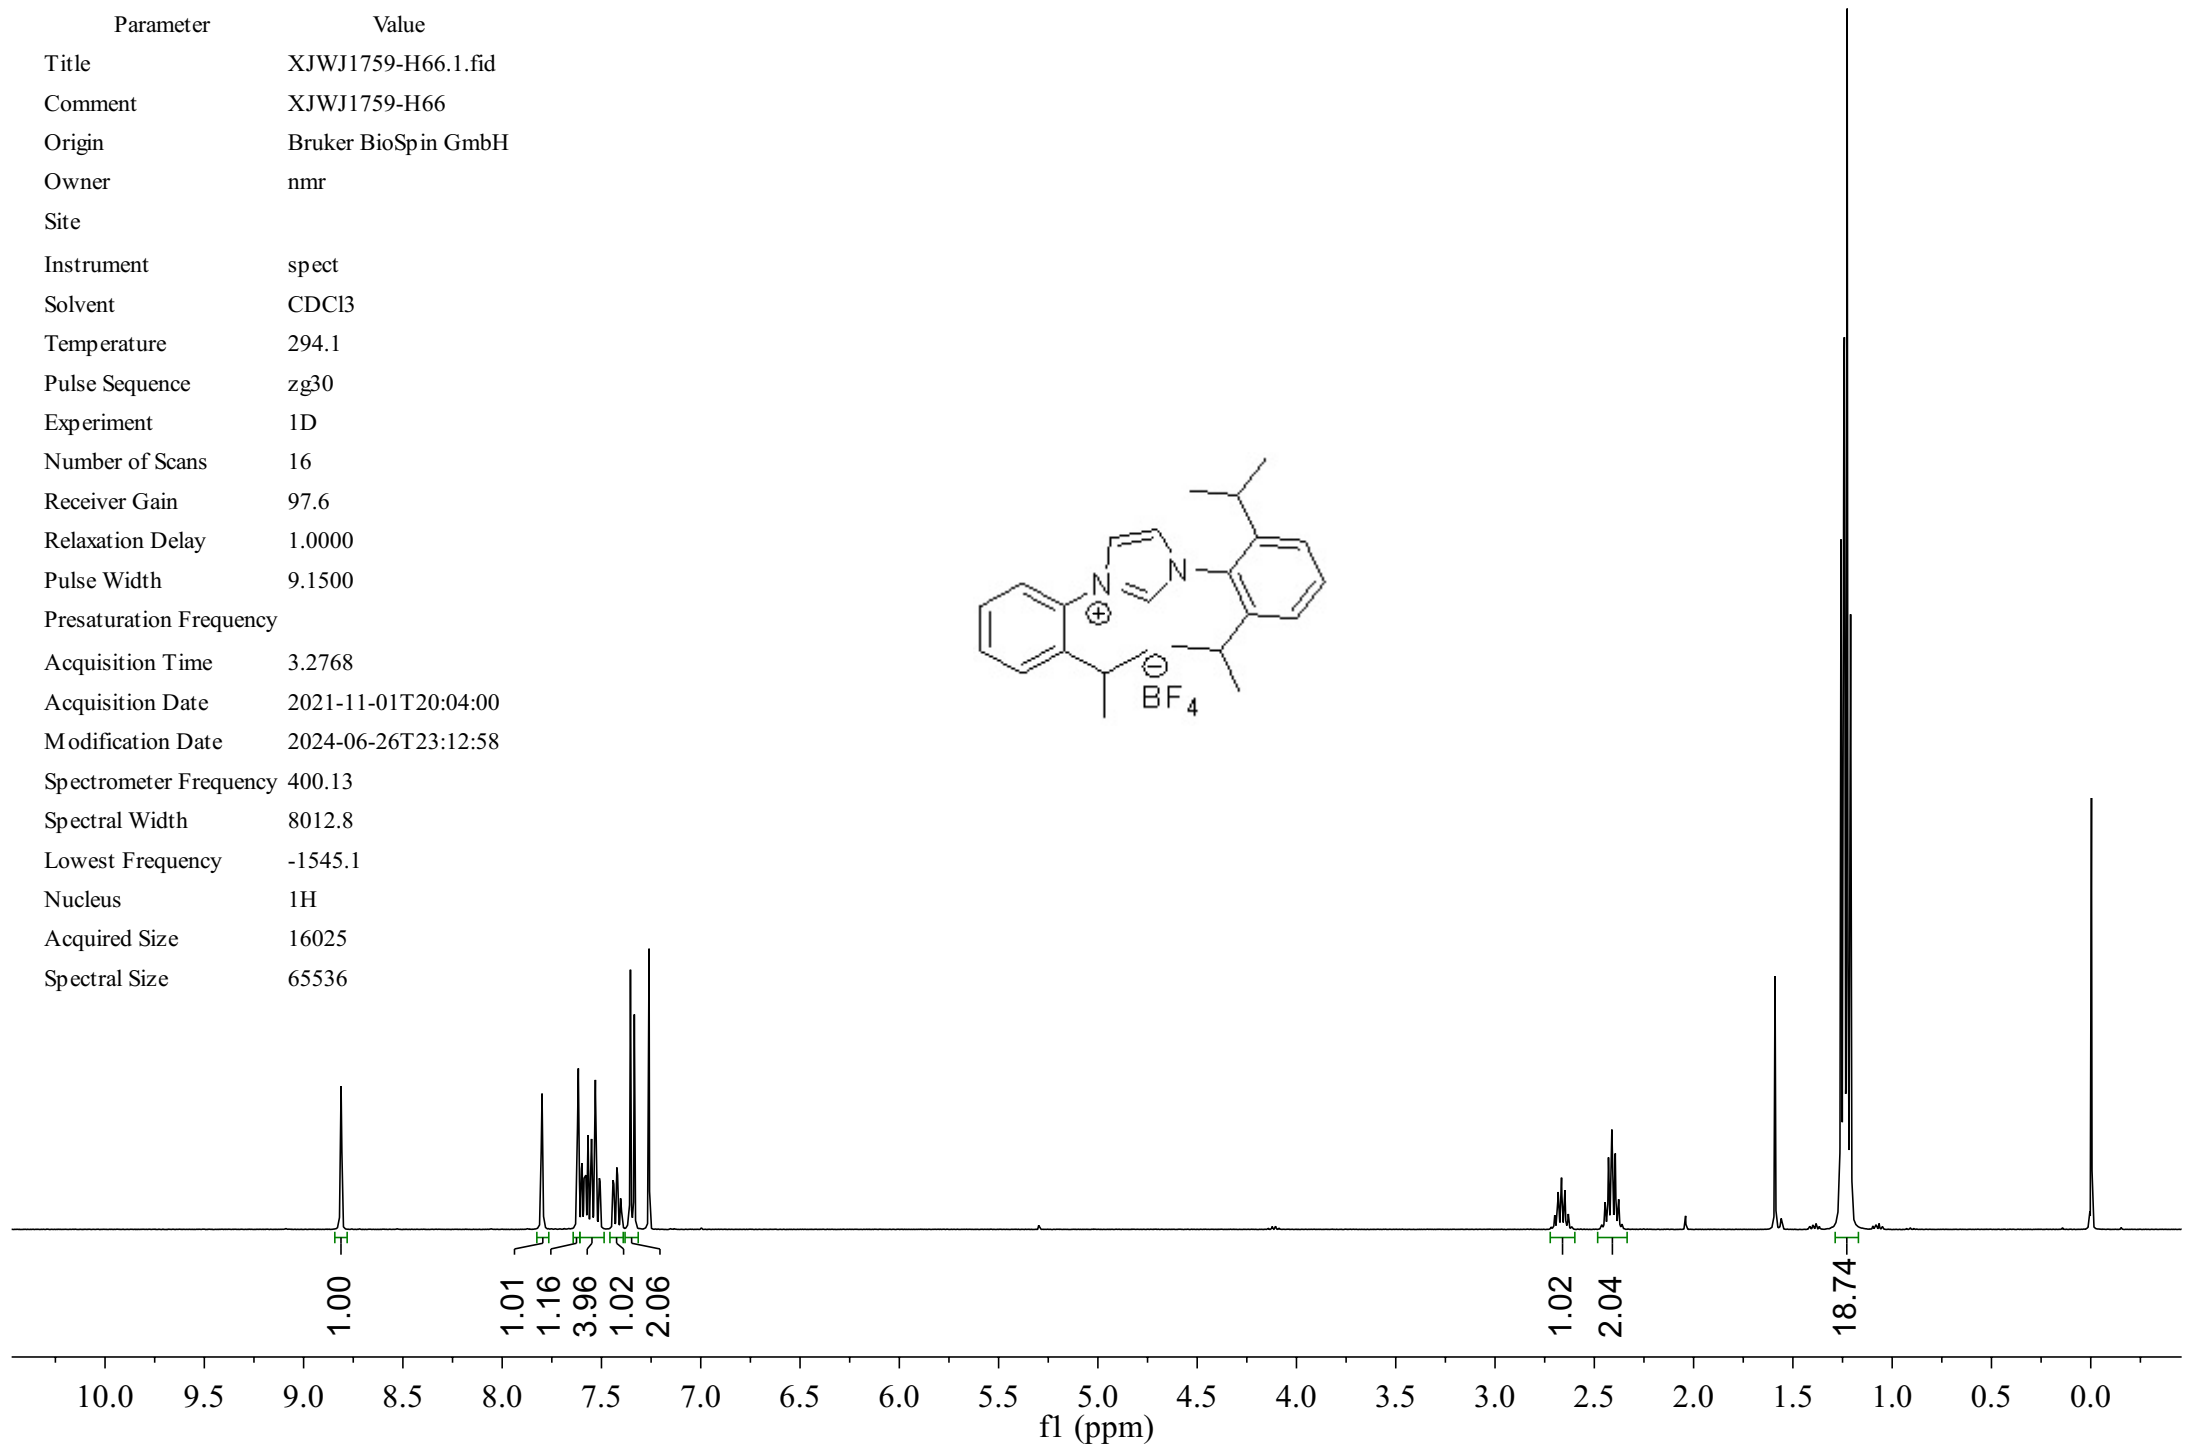

| Parameter               | Value               |
|-------------------------|---------------------|
| Title                   | XJWJ1759-C66.1.fid  |
| Comment                 |                     |
| Origin                  | Bruker BioSpin GmbH |
| Owner                   | nmr                 |
| Site                    |                     |
| Instrument              | spect               |
| Solvent                 | CDCl3               |
| Temperature             | 296.2               |
| Pulse Sequence          | zgpg30              |
| Experiment              | 1D                  |
| Number of Scans         | 64                  |
| Receiver Gain           | 193.1               |
| Relaxation Delay        | 2.0000              |
| Pulse Width             | 9.9400              |
| Presaturation Frequency |                     |
| Acquisition Time        | 1.1010              |
| Acquisition Date        | 2021-11-01T20:07:00 |
| Modification Date       | 2024-06-26T23:12:42 |
| Spectrometer Frequency  | 125.77              |
| Spectral Width          | 29761.9             |
| Lowest Frequency        | -2292.8             |
| Nucleus                 | <sup>13</sup> C     |
| Acquired Size           | 32768               |
| Spectral Size           | 65536               |

145.3  
144.0  
137.2  
132.2  
132.1  
132.0  
129.9  
127.8  
127.3  
127.1  
125.9  
125.9  
124.8

29.0  
28.5  
24.3  
24.2  
23.8

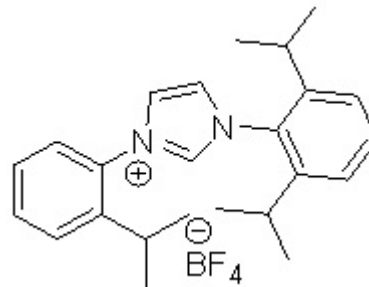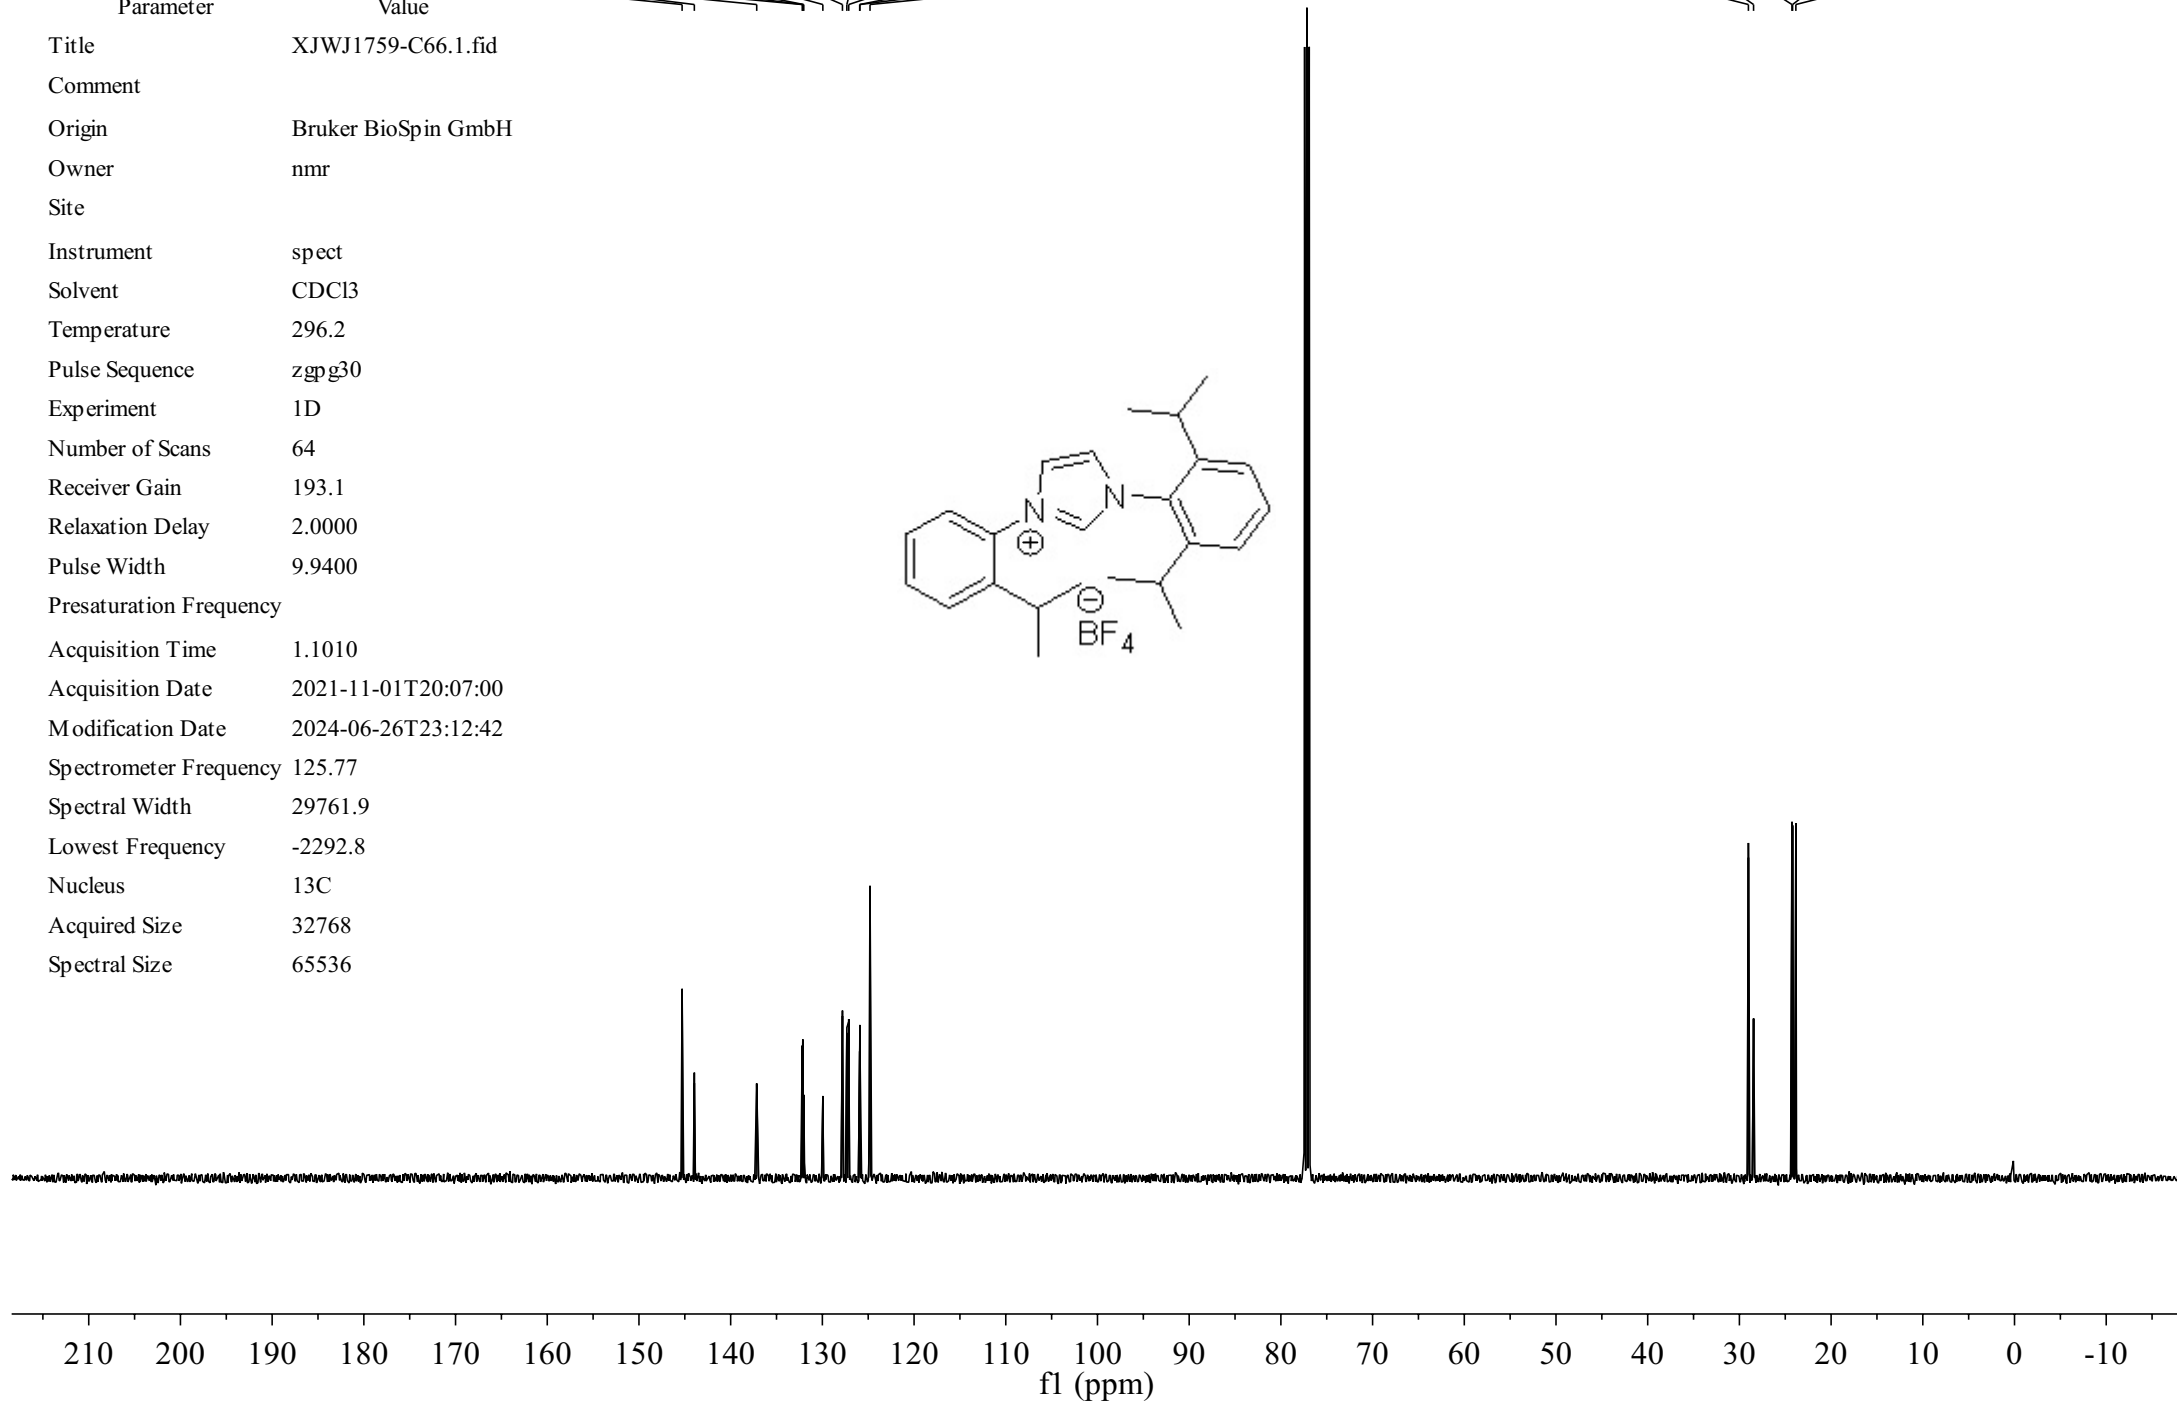

XJWJ1759-F66.1.fid  
XJWJ1759-F66

| Parameter               | Value               |
|-------------------------|---------------------|
| Title                   | XJWJ1759-F66.1.fid  |
| Comment                 | XJWJ1759-F66        |
| Origin                  | Bruker BioSpin GmbH |
| Owner                   | nmr                 |
| Site                    |                     |
| Instrument              | spect               |
| Solvent                 | CDC13               |
| Temperature             | 294.1               |
| Pulse Sequence          | zgfhigqn.2          |
| Experiment              | 1D                  |
| Number of Scans         | 16                  |
| Receiver Gain           | 196.4               |
| Relaxation Delay        | 1.0000              |
| Pulse Width             | 16.4100             |
| Presaturation Frequency |                     |
| Acquisition Time        | 0.7340              |
| Acquisition Date        | 2021-10-31T18:40:34 |
| Modification Date       | 2024-06-26T23:12:45 |
| Spectrometer Frequency  | 376.46              |
| Spectral Width          | 89285.7             |
| Lowest Frequency        | -82292.7            |
| Nucleus                 | 19F                 |
| Acquired Size           | 65536               |
| Spectral Size           | 131072              |

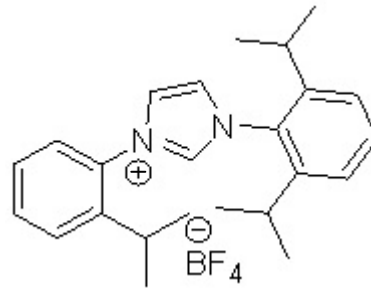

152.3  
152.3  
152.3

10 0 -10 -20 -30 -40 -50 -60 -70 -80 -90 -100 -110 -120 -130 -140 -150 -160 -170 -180 -190 -200 -210  
f1 (ppm)

[NHC-Ni(allyl)Cl]

| IME | Parameter               | Value               |
|-----|-------------------------|---------------------|
|     | Title                   | YM-20240628-1.3.fid |
|     | Comment                 | IME                 |
|     | Origin                  | Bruker BioSpin GmbH |
|     | Owner                   | nmr                 |
|     | Site                    |                     |
|     | Instrument              | spect               |
|     | Solvent                 | C6D6                |
|     | Temperature             | 296.2               |
|     | Pulse Sequence          | zg30                |
|     | Experiment              | 1D                  |
|     | Number of Scans         | 16                  |
|     | Receiver Gain           | 62.9                |
|     | Relaxation Delay        | 1.0000              |
|     | Pulse Width             | 11.3200             |
|     | Presaturation Frequency |                     |
|     | Acquisition Time        | 3.2768              |
|     | Acquisition Date        | 2024-06-28T06:22:01 |
|     | Modification Date       | 2024-06-28T10:14:22 |
|     | Spectrometer Frequency  | 500.13              |
|     | Spectral Width          | 10000.0             |
|     | Lowest Frequency        | -1907.0             |
|     | Nucleus                 | 1H                  |
|     | Acquired Size           | 32768               |
|     | Spectral Size           | 65536               |

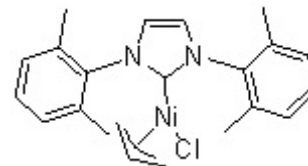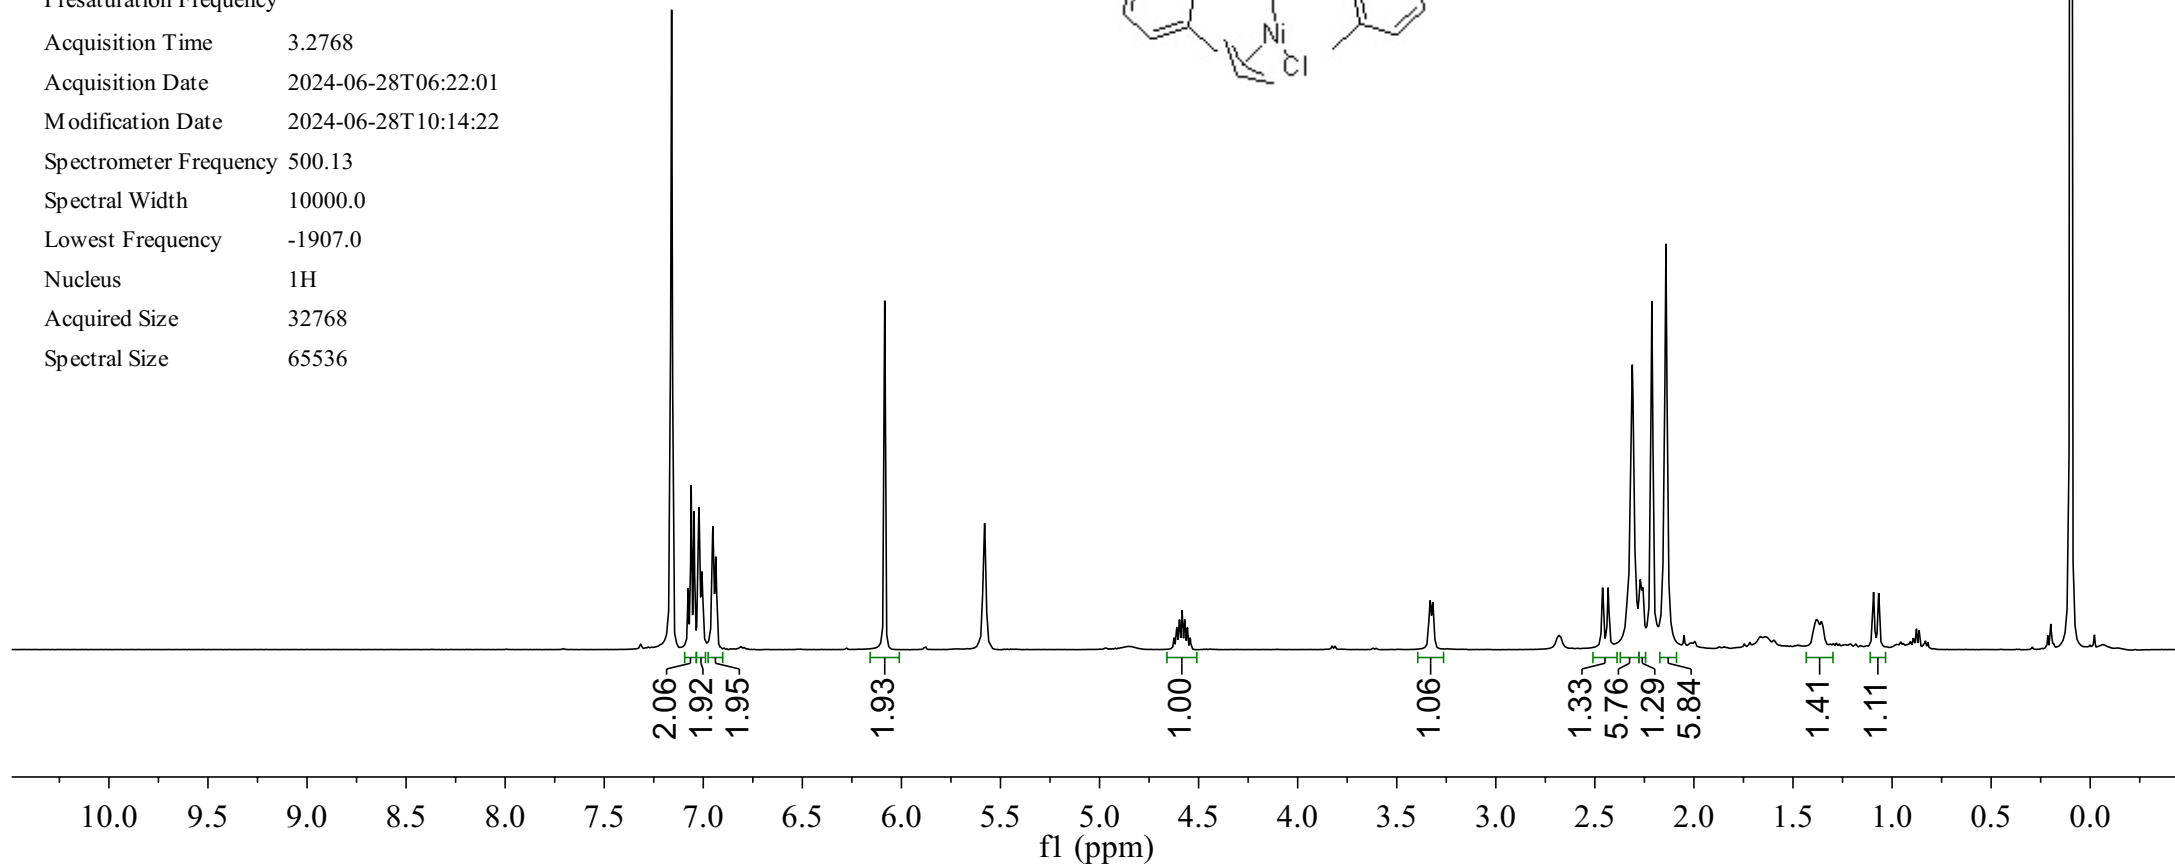



YM-20240628-1.4.fid  
IME

—186.1

139.0

136.4

129.3

122.7

—107.6

—69.9

—43.5

—28.4

18.8

18.7

| Parameter               | Value               |
|-------------------------|---------------------|
| Title                   | YM-20240628-1.4.fid |
| Comment                 | IME                 |
| Origin                  | Bruker BioSpin GmbH |
| Owner                   | nmr                 |
| Site                    |                     |
| Instrument              | spect               |
| Solvent                 | C6D6                |
| Temperature             | 296.2               |
| Pulse Sequence          | zpgg30              |
| Experiment              | 1D                  |
| Number of Scans         | 896                 |
| Receiver Gain           | 193.1               |
| Relaxation Delay        | 2.0000              |
| Pulse Width             | 9.9400              |
| Presaturation Frequency |                     |
| Acquisition Time        | 1.1010              |
| Acquisition Date        | 2024-06-28T09:01:27 |
| Modification Date       | 2024-06-28T13:53:55 |
| Spectrometer Frequency  | 125.77              |
| Spectral Width          | 29761.9             |
| Lowest Frequency        | -2257.8             |
| Nucleus                 | <sup>13</sup> C     |
| Acquired Size           | 32768               |
| Spectral Size           | 65536               |

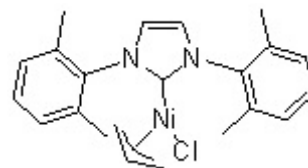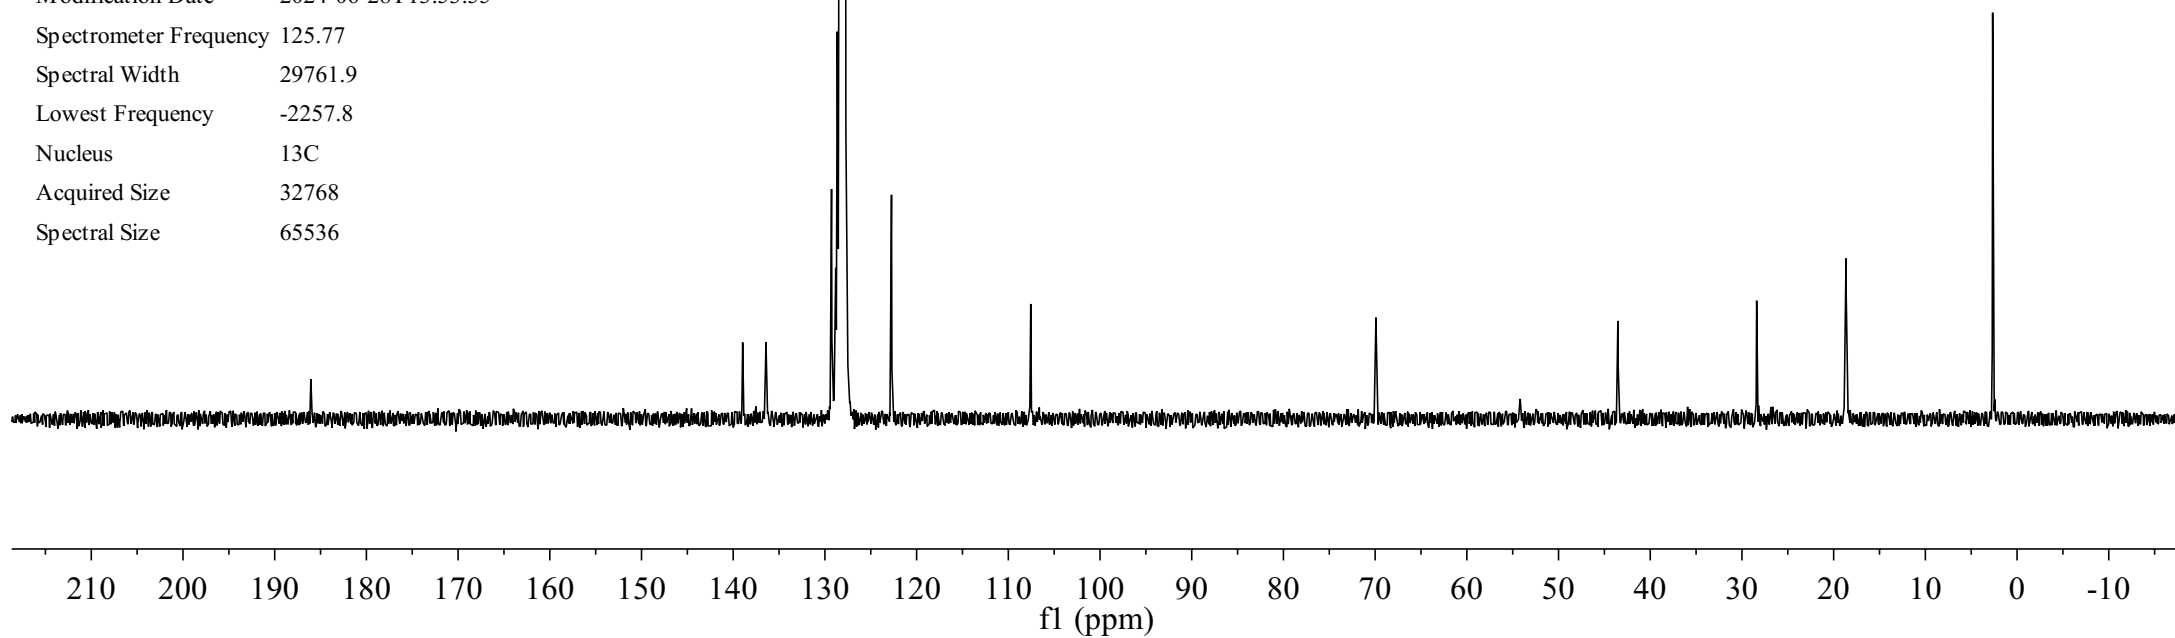

YM-20240628-2.3.fid

| L2 | Parameter               | Value               |
|----|-------------------------|---------------------|
|    | Title                   | YM-20240628-2.3.fid |
|    | Comment                 | L2                  |
|    | Origin                  | Bruker BioSpin GmbH |
|    | Owner                   | nmr                 |
|    | Site                    |                     |
|    | Instrument              | spect               |
|    | Solvent                 | C6D6                |
|    | Temperature             | 296.1               |
|    | Pulse Sequence          | zg30                |
|    | Experiment              | 1D                  |
|    | Number of Scans         | 16                  |
|    | Receiver Gain           | 48.5                |
|    | Relaxation Delay        | 1.0000              |
|    | Pulse Width             | 11.3200             |
|    | Presaturation Frequency |                     |
|    | Acquisition Time        | 3.2768              |
|    | Acquisition Date        | 2024-06-28T06:30:15 |
|    | Modification Date       | 2024-06-28T10:14:19 |
|    | Spectrometer Frequency  | 500.13              |
|    | Spectral Width          | 10000.0             |
|    | Lowest Frequency        | -1911.5             |
|    | Nucleus                 | 1H                  |
|    | Acquired Size           | 32768               |
|    | Spectral Size           | 65536               |

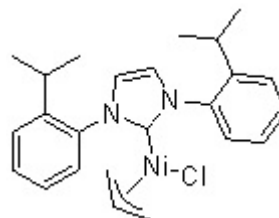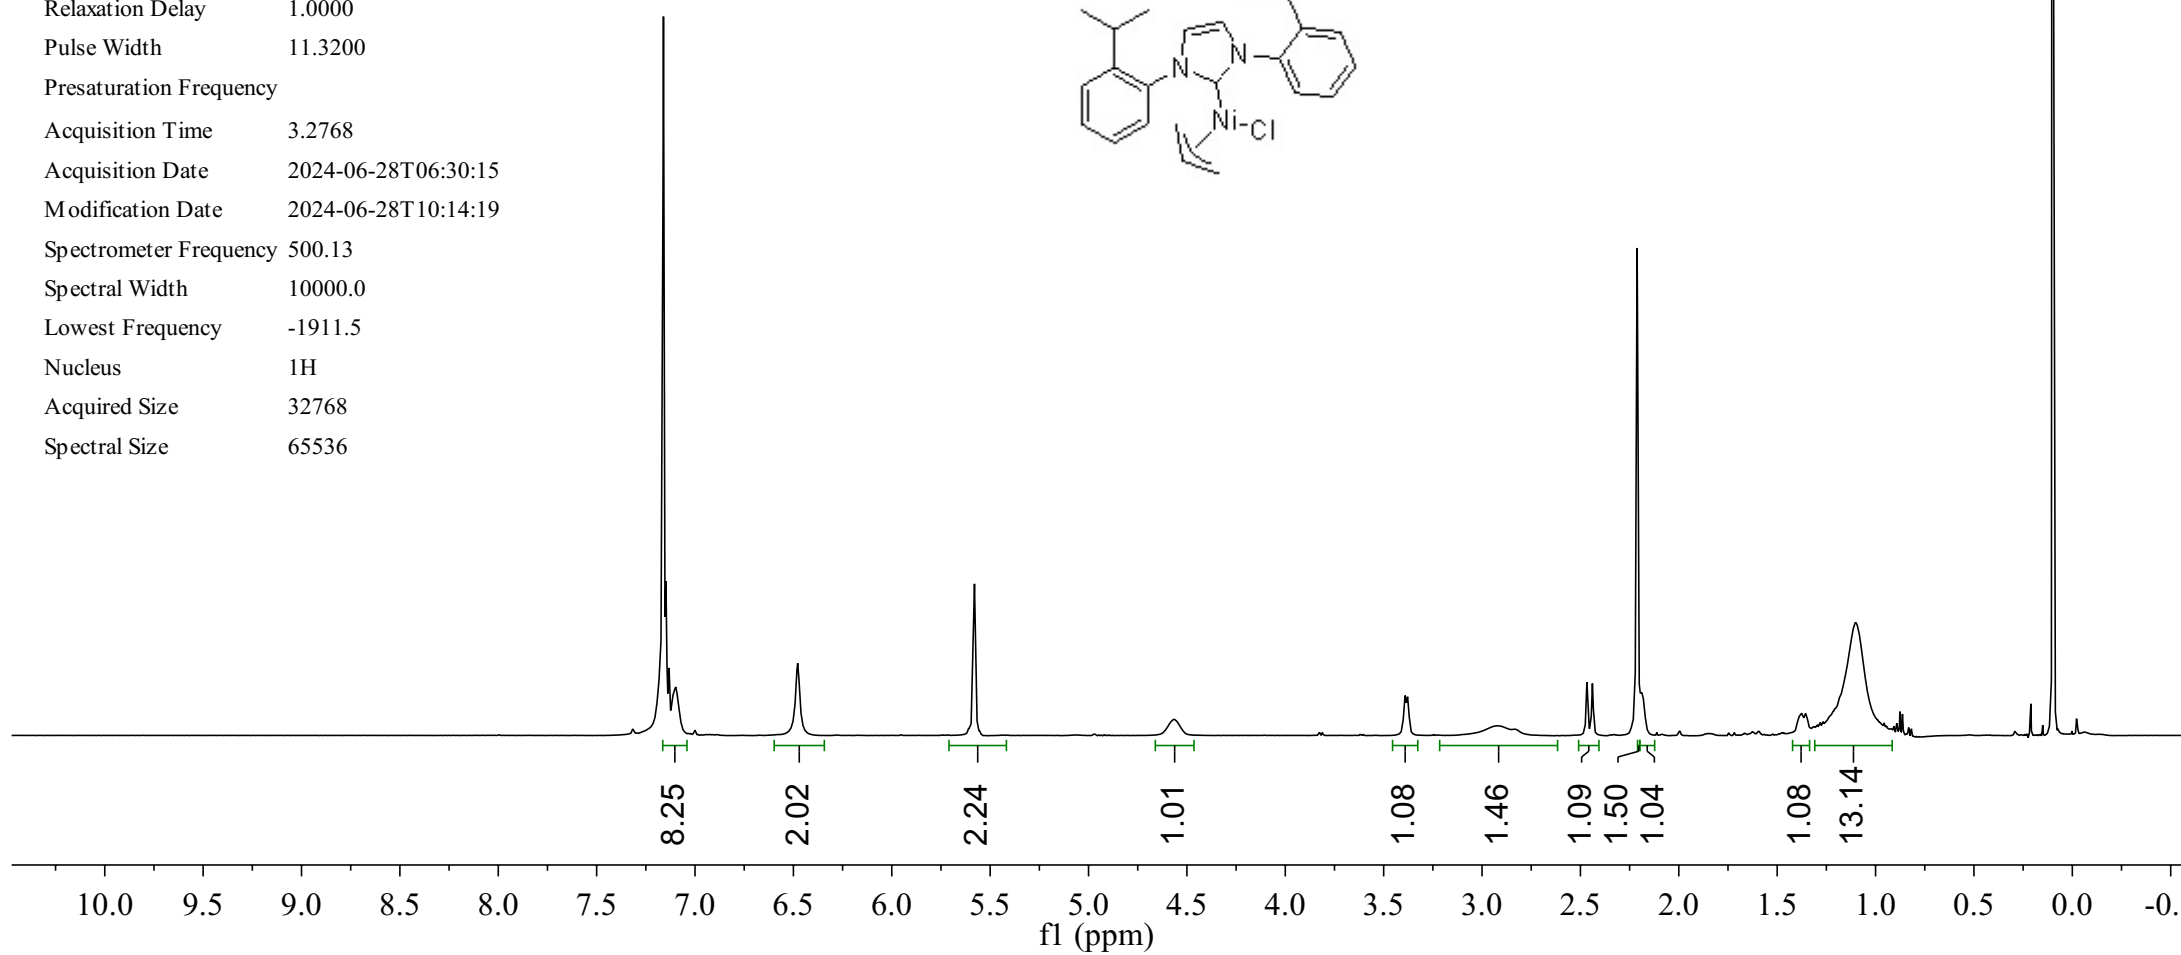

YM-20240628-2.5.fid  
L2

188.0

138.3

129.9

128.8

128.4

123.3

107.5

68.5

43.7

35.7

28.4

28.1

| Parameter               | Value               |
|-------------------------|---------------------|
| Title                   | YM-20240628-2.5.fid |
| Comment                 | L2                  |
| Origin                  | Bruker BioSpin GmbH |
| Owner                   | nmr                 |
| Site                    |                     |
| Instrument              | spect               |
| Solvent                 | C6D6                |
| Temperature             | 296.1               |
| Pulse Sequence          | zpg30               |
| Experiment              | 1D                  |
| Number of Scans         | 896                 |
| Receiver Gain           | 193.1               |
| Relaxation Delay        | 2.0000              |
| Pulse Width             | 9.9400              |
| Presaturation Frequency |                     |
| Acquisition Time        | 1.1010              |
| Acquisition Date        | 2024-06-28T07:19:41 |
| Modification Date       | 2024-06-29T13:21:14 |
| Spectrometer Frequency  | 125.77              |
| Spectral Width          | 29761.9             |
| Lowest Frequency        | -2258.2             |
| Nucleus                 | 13C                 |
| Acquired Size           | 32768               |
| Spectral Size           | 65536               |

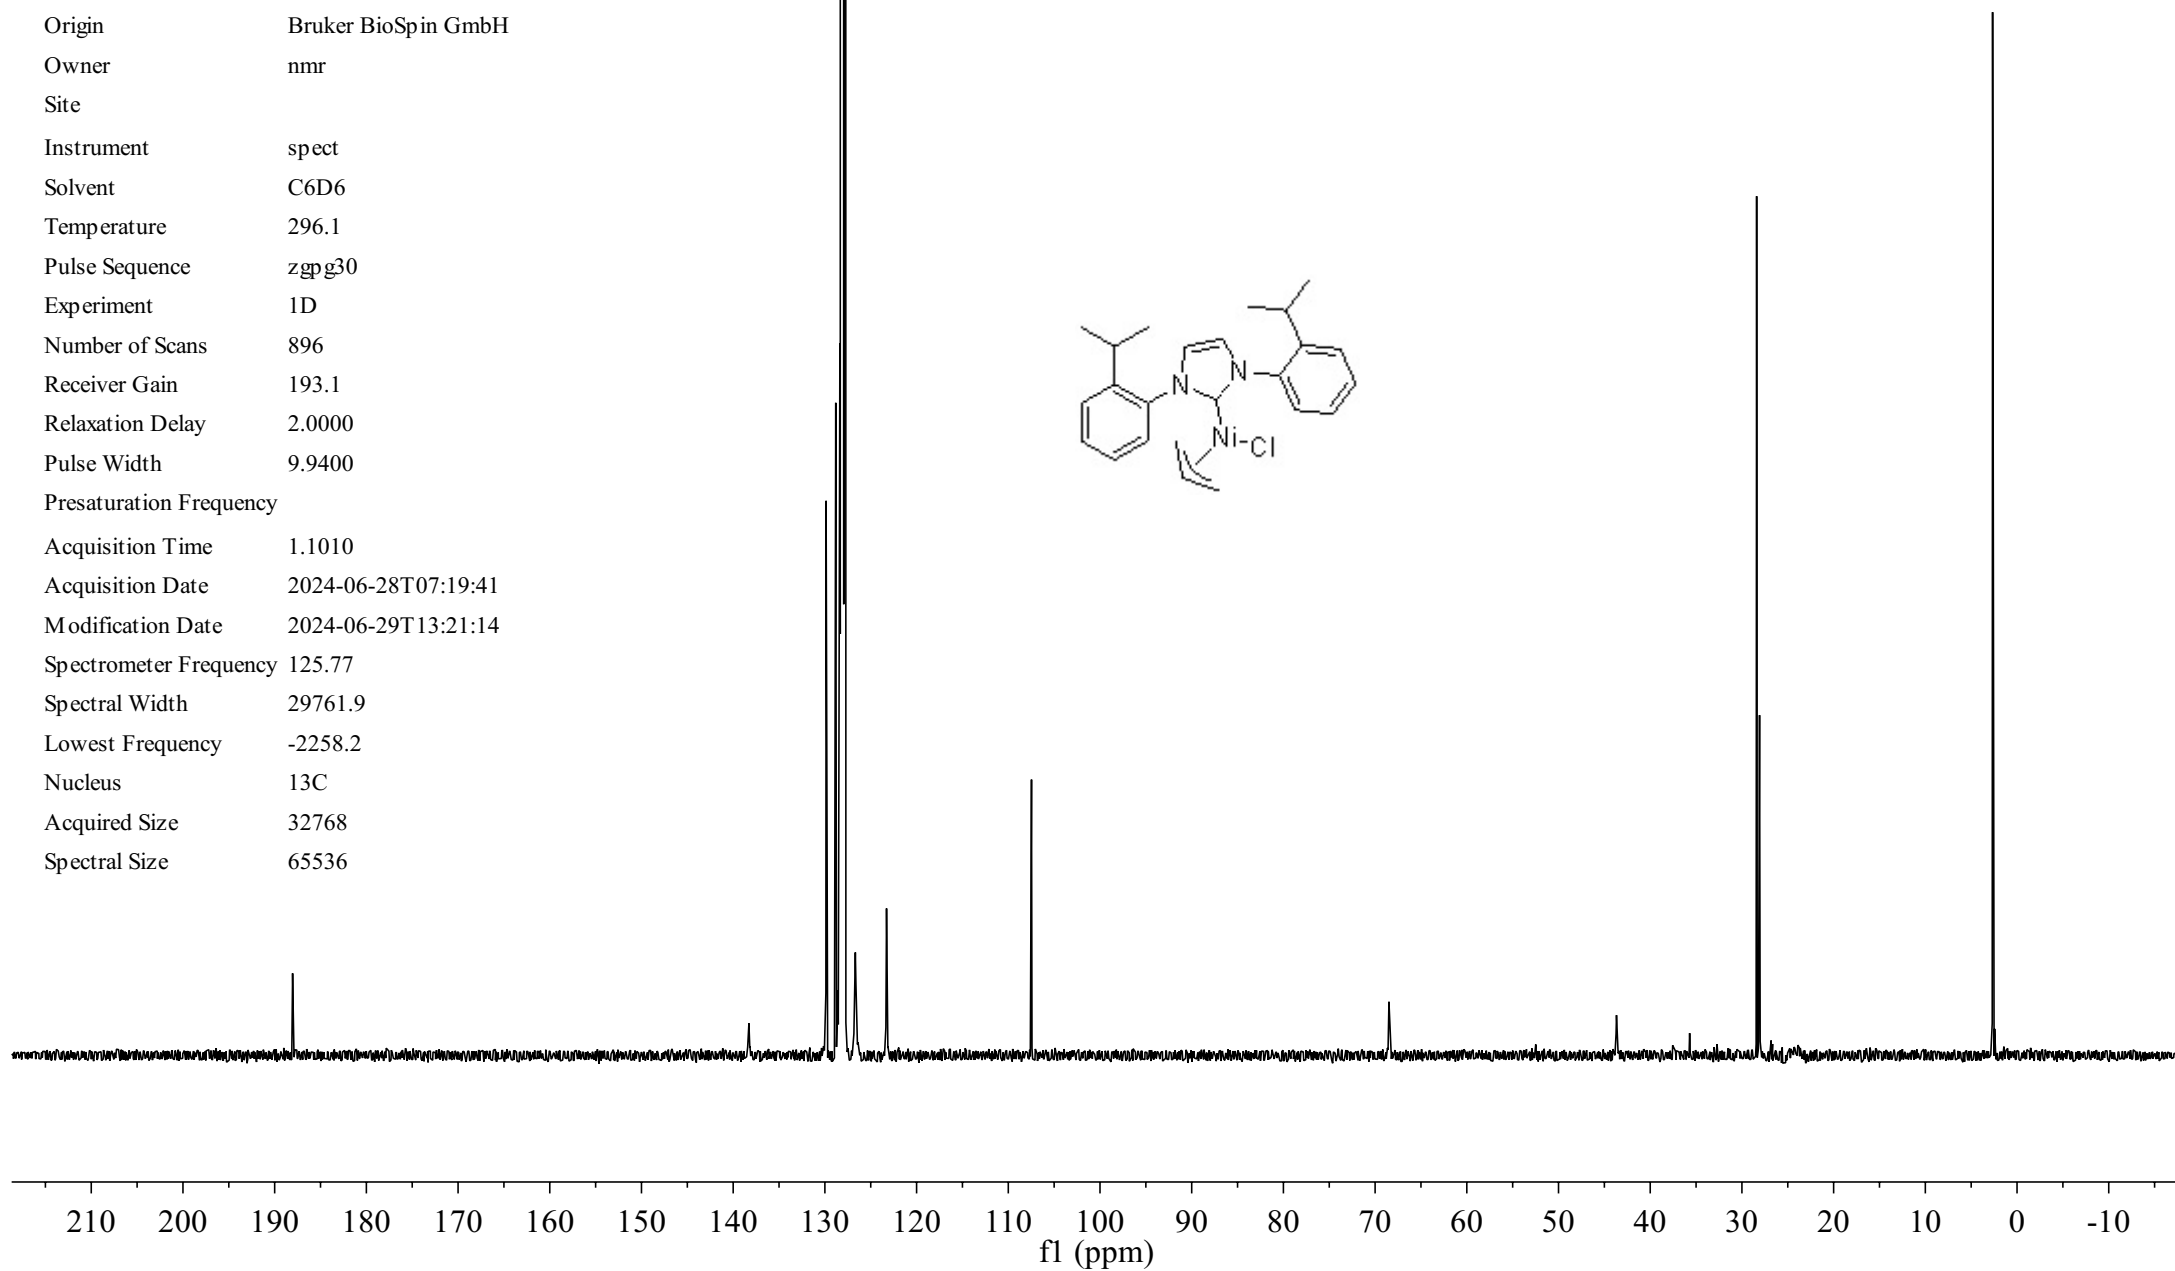

YM-20240628-3.3.fid

| L3 | Parameter               | Value               |
|----|-------------------------|---------------------|
|    | Title                   | YM-20240628-3.3.fid |
|    | Comment                 | L3                  |
|    | Origin                  | Bruker BioSpin GmbH |
|    | Owner                   | nmr                 |
|    | Site                    |                     |
|    | Instrument              | spect               |
|    | Solvent                 | C6D6                |
|    | Temperature             | 296.1               |
|    | Pulse Sequence          | zg30                |
|    | Experiment              | 1D                  |
|    | Number of Scans         | 16                  |
|    | Receiver Gain           | 31.1                |
|    | Relaxation Delay        | 1.0000              |
|    | Pulse Width             | 11.3200             |
|    | Presaturation Frequency |                     |
|    | Acquisition Time        | 3.2768              |
|    | Acquisition Date        | 2024-06-28T06:26:12 |
|    | Modification Date       | 2024-06-28T10:14:21 |
|    | Spectrometer Frequency  | 500.13              |
|    | Spectral Width          | 10000.0             |
|    | Lowest Frequency        | -1907.0             |
|    | Nucleus                 | 1H                  |
|    | Acquired Size           | 32768               |
|    | Spectral Size           | 65536               |

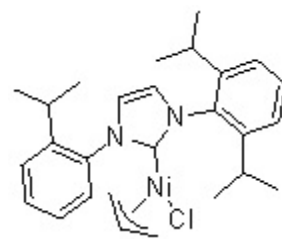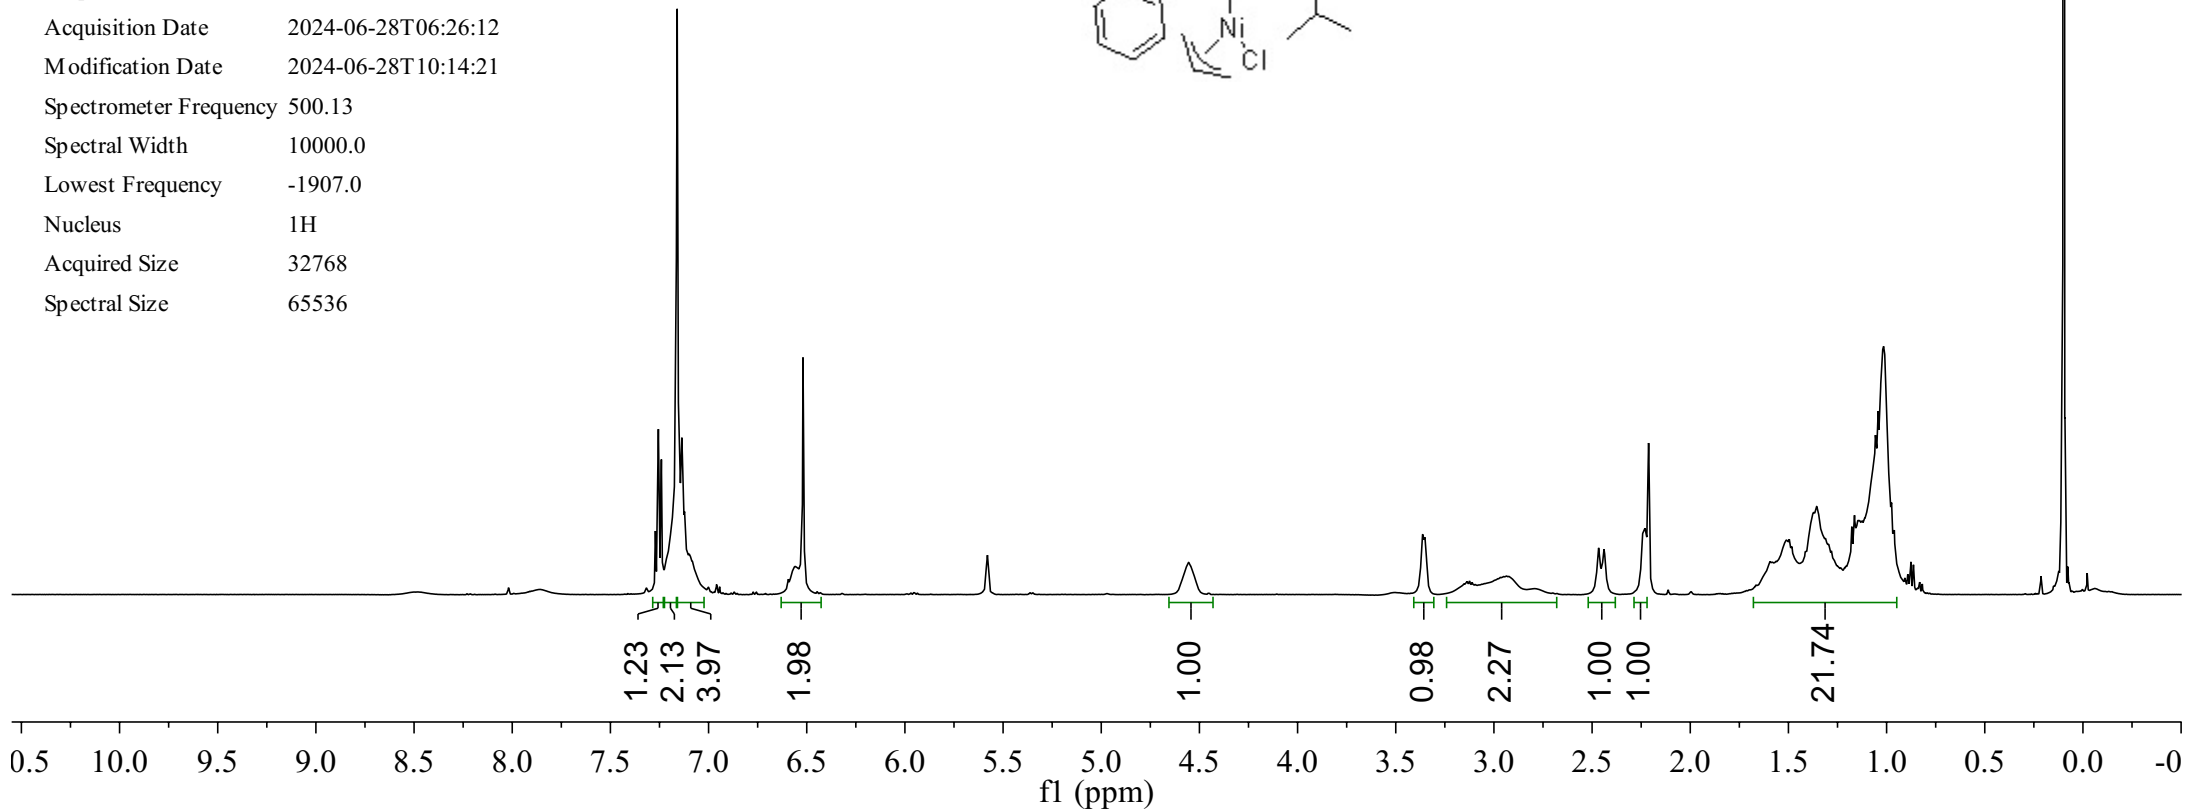

YM-20240628-3.4.fid  
L3

188.4

138.5  
136.2  
130.4  
130.1  
129.8  
128.8  
126.6  
124.6  
123.9  
123.0  
107.5

68.9

43.7  
35.7  
28.8  
28.7  
28.4  
28.1  
26.6

| Parameter               | Value               |
|-------------------------|---------------------|
| Title                   | YM-20240628-3.4.fid |
| Comment                 | L3                  |
| Origin                  | Bruker BioSpin GmbH |
| Owner                   | nmr                 |
| Site                    |                     |
| Instrument              | spect               |
| Solvent                 | C6D6                |
| Temperature             | 296.1               |
| Pulse Sequence          | zgpg30              |
| Experiment              | 1D                  |
| Number of Scans         | 896                 |
| Receiver Gain           | 193.1               |
| Relaxation Delay        | 2.0000              |
| Pulse Width             | 9.9400              |
| Presaturation Frequency |                     |
| Acquisition Time        | 1.1010              |
| Acquisition Date        | 2024-06-28T08:10:39 |
| Modification Date       | 2024-06-28T13:53:55 |
| Spectrometer Frequency  | 125.77              |
| Spectral Width          | 29761.9             |
| Lowest Frequency        | -2258.2             |
| Nucleus                 | <sup>13</sup> C     |
| Acquired Size           | 32768               |
| Spectral Size           | 65536               |

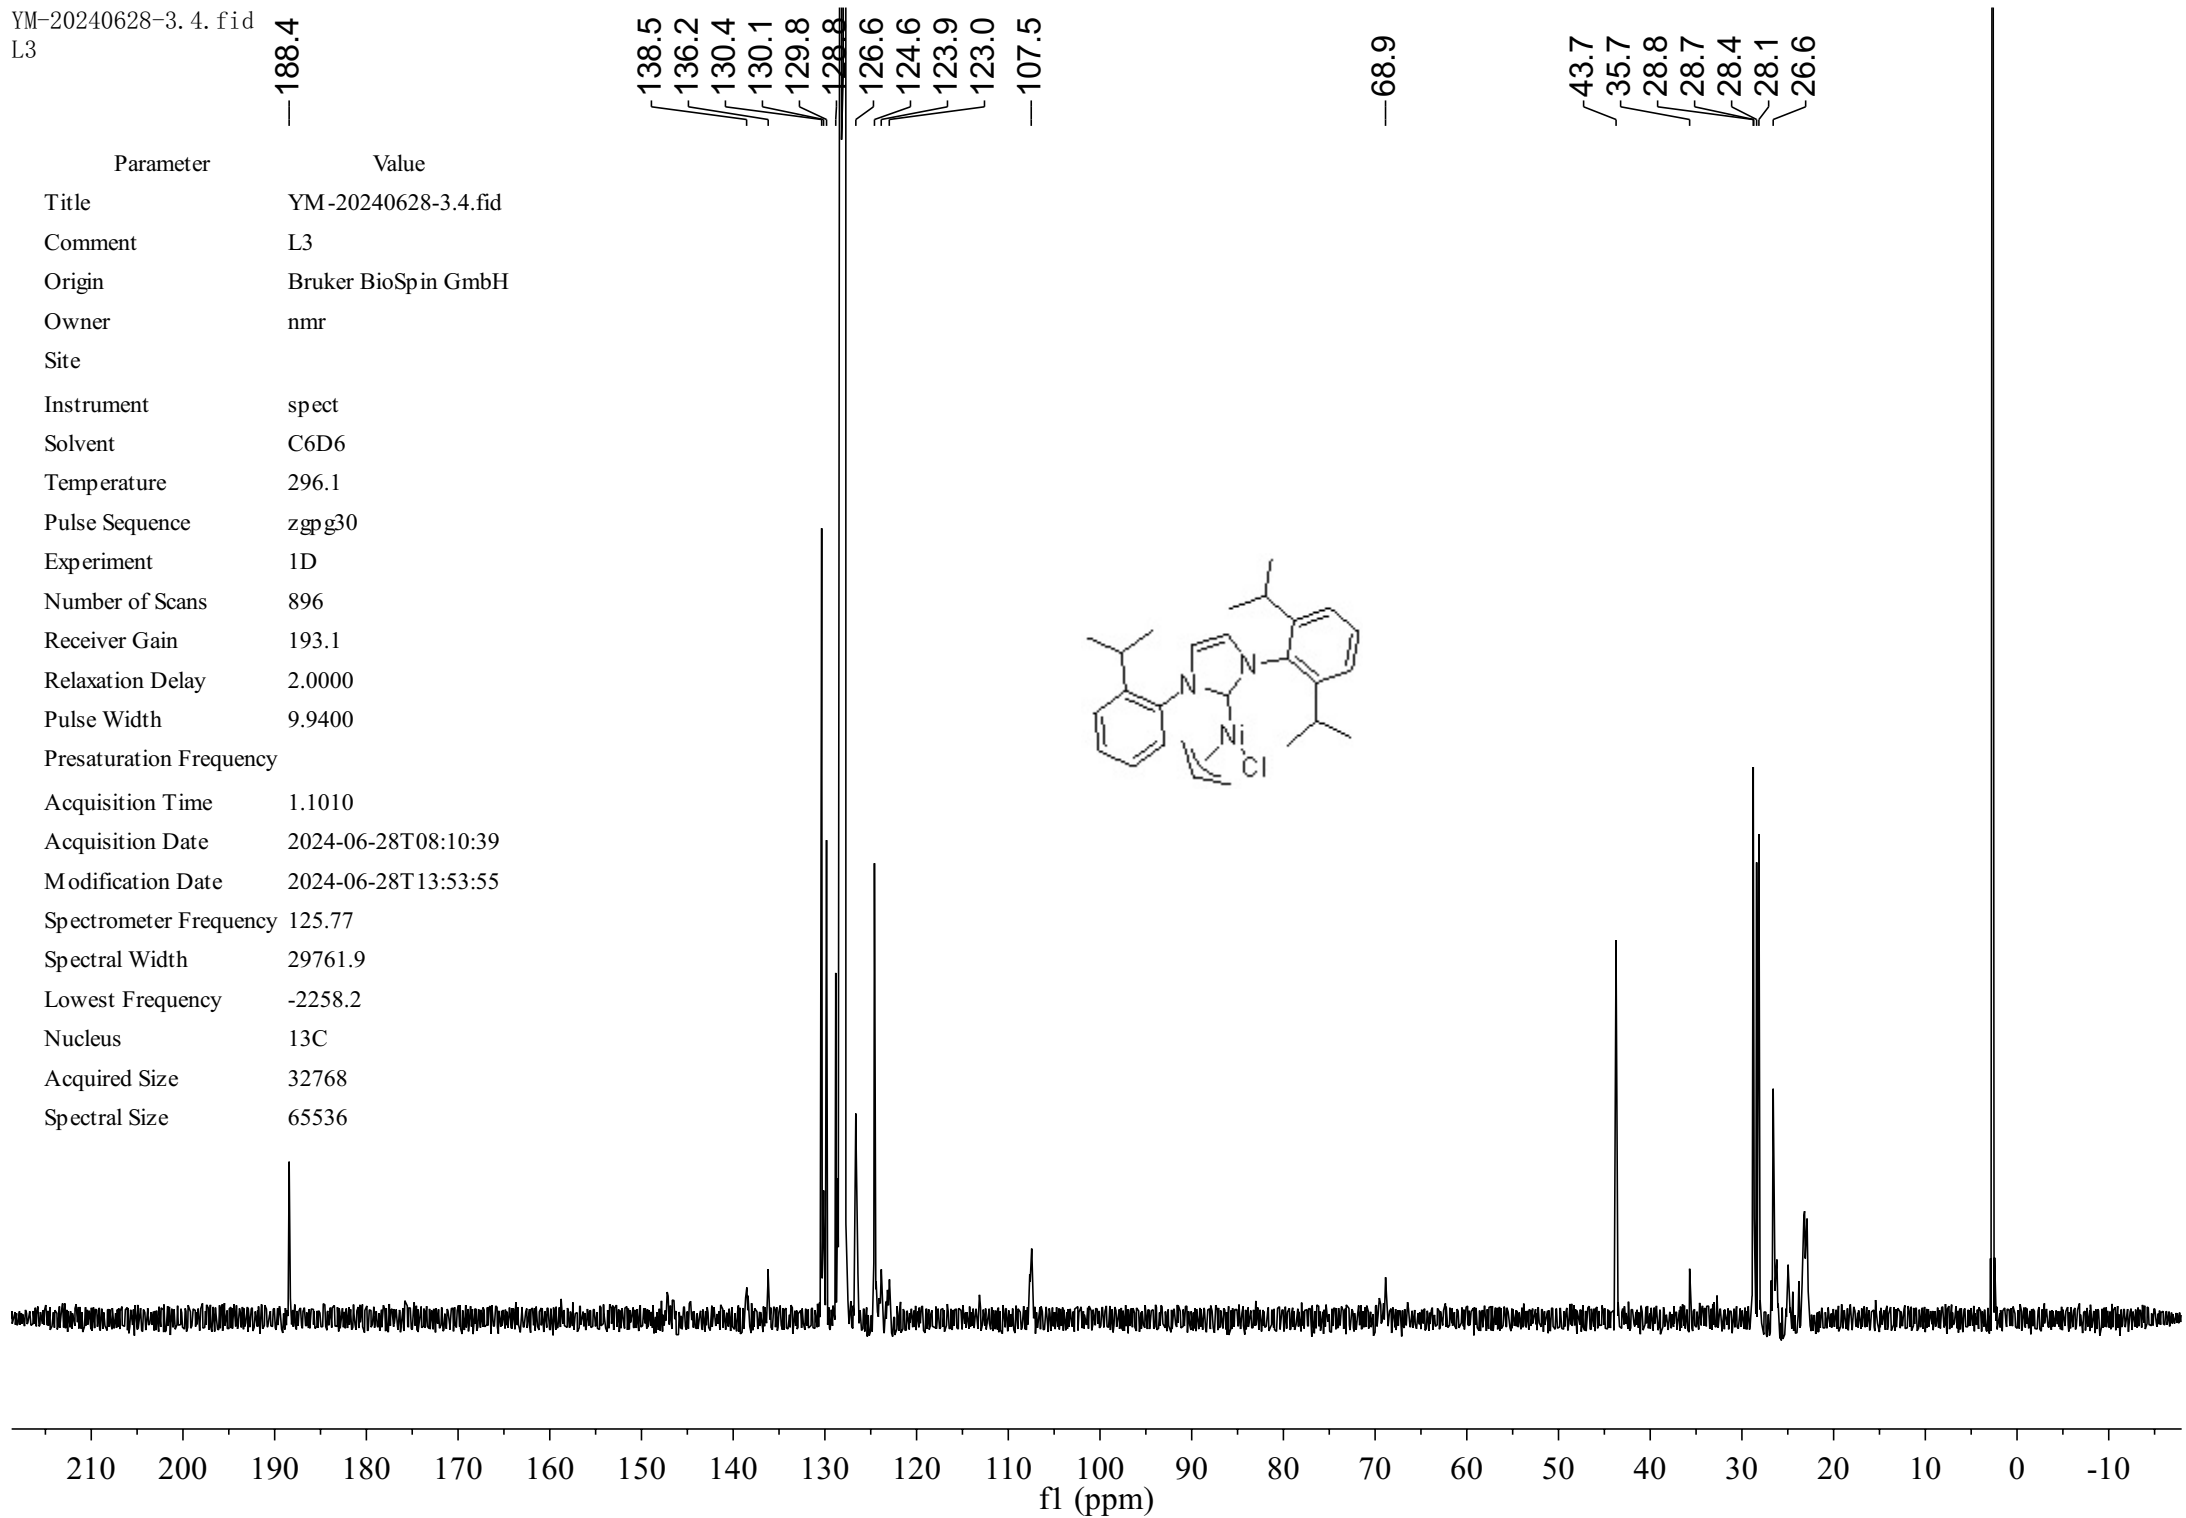

Cross hydroalkenylation Products in Table 1

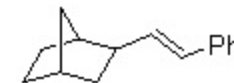

| Parameter               | Value                   |
|-------------------------|-------------------------|
| Title                   | YM-20240306-5-iso.1.fid |
| Comment                 | s4                      |
| Origin                  | Bruker BioSpin GmbH     |
| Owner                   | nmrsu                   |
| Site                    |                         |
| Instrument              | Avance NEO 400          |
| Solvent                 | CDCl <sub>3</sub>       |
| Temperature             | 296.4                   |
| Pulse Sequence          | zg30                    |
| Experiment              | 1D                      |
| Number of Scans         | 16                      |
| Receiver Gain           | 90.5                    |
| Relaxation Delay        | 1.0000                  |
| Pulse Width             | 8.0000                  |
| Presaturation Frequency |                         |
| Acquisition Time        | 3.9977                  |
| Acquisition Date        | 2024-03-10T22:01:21     |
| Modification Date       | 2024-03-10T22:16:10     |
| Spectrometer Frequency  | 400.14                  |
| Spectral Width          | 8196.7                  |
| Lowest Frequency        | -1646.7                 |
| Nucleus                 | <sup>1</sup> H          |
| Acquired Size           | 32768                   |
| Spectral Size           | 65536                   |

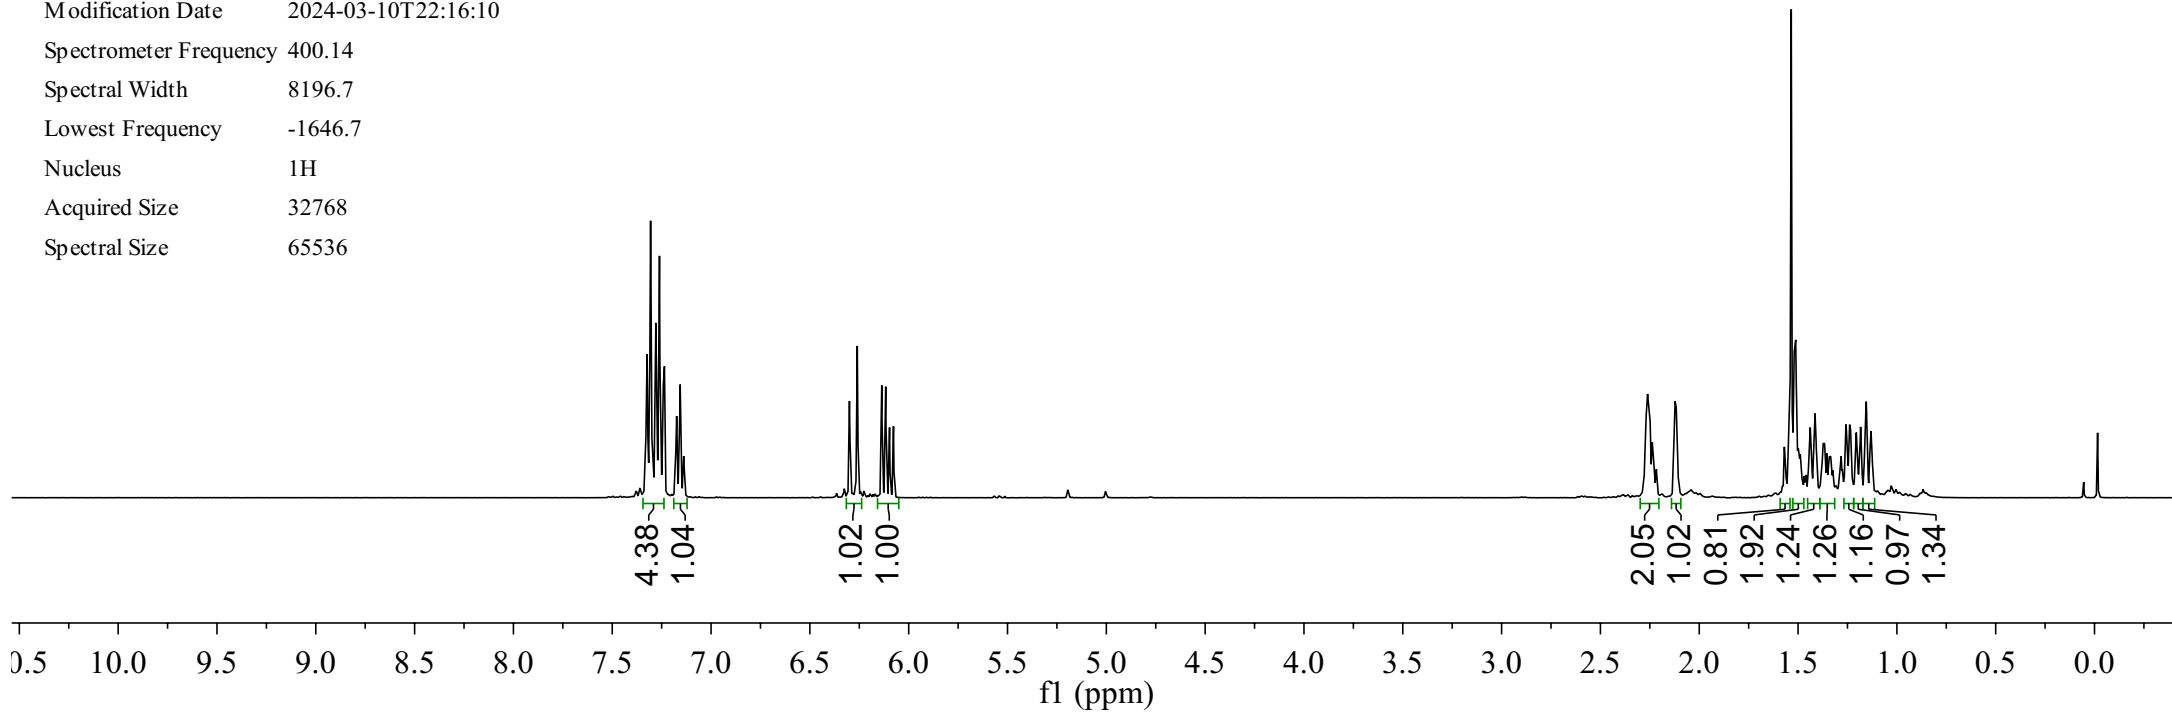

YM-20240306-5-iso.8.fid

| Parameter               | Value                   |
|-------------------------|-------------------------|
| Title                   | YM-20240306-5-iso.8.fid |
| Comment                 | s4                      |
| Origin                  | Bruker BioSpin GmbH     |
| Owner                   | PC                      |
| Site                    |                         |
| Instrument              | spect                   |
| Solvent                 | CDC13                   |
| Temperature             | 297.6                   |
| Pulse Sequence          | zgpg30                  |
| Experiment              | 1D                      |
| Number of Scans         | 64                      |
| Receiver Gain           | 196.4                   |
| Relaxation Delay        | 2.0000                  |
| Pulse Width             | 10.2200                 |
| Presaturation Frequency |                         |
| Acquisition Time        | 1.2976                  |
| Acquisition Date        | 2024-04-02T21:55:12     |
| Modification Date       | 2024-04-03T05:12:39     |
| Spectrometer Frequency  | 100.62                  |
| Spectral Width          | 25252.5                 |
| Lowest Frequency        | -525.8                  |
| Nucleus                 | 13C                     |
| Acquired Size           | 32768                   |
| Spectral Size           | 65536                   |

138.1  
136.6  
128.6  
127.4  
126.8  
126.1

45.6  
42.9  
38.1  
36.8  
36.0  
29.9  
29.2

rac-exo-*E*

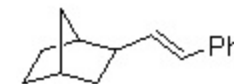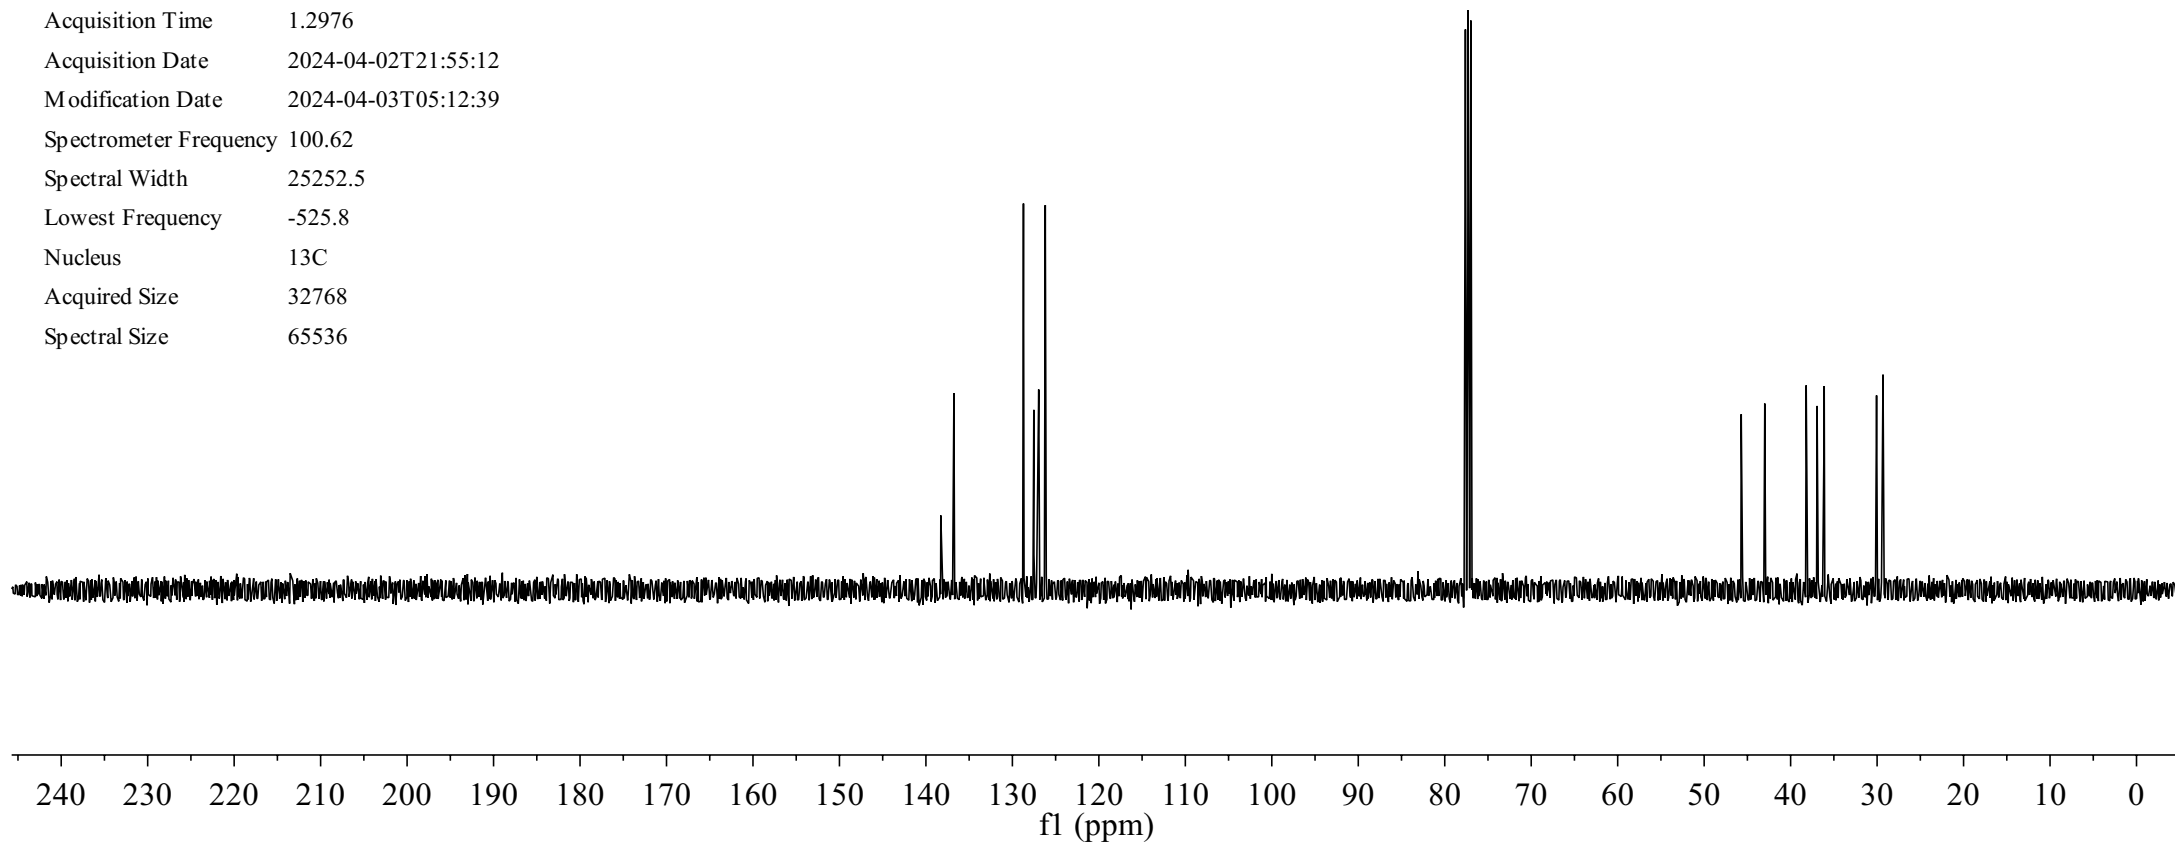



YM-20240331-1-iso.3.fid

| Parameter               | Value                   |
|-------------------------|-------------------------|
| Title                   | YM-20240331-1-iso.3.fid |
| Comment                 | S15                     |
| Origin                  | Bruker BioSpin GmbH     |
| Owner                   | PC                      |
| Site                    |                         |
| Instrument              | spect                   |
| Solvent                 | CDC13                   |
| Temperature             | 297.4                   |
| Pulse Sequence          | zg30                    |
| Experiment              | 1D                      |
| Number of Scans         | 8                       |
| Receiver Gain           | 126.1                   |
| Relaxation Delay        | 1.0000                  |
| Pulse Width             | 9.2600                  |
| Presaturation Frequency |                         |
| Acquisition Time        | 1.9999                  |
| Acquisition Date        | 2024-04-02T21:45:22     |
| Modification Date       | 2024-04-03T05:12:41     |
| Spectrometer Frequency  | 400.13                  |
| Spectral Width          | 8012.8                  |
| Lowest Frequency        | -1535.2                 |
| Nucleus                 | 1H                      |
| Acquired Size           | 16025                   |
| Spectral Size           | 65536                   |

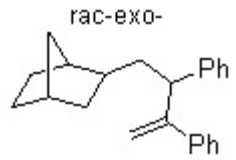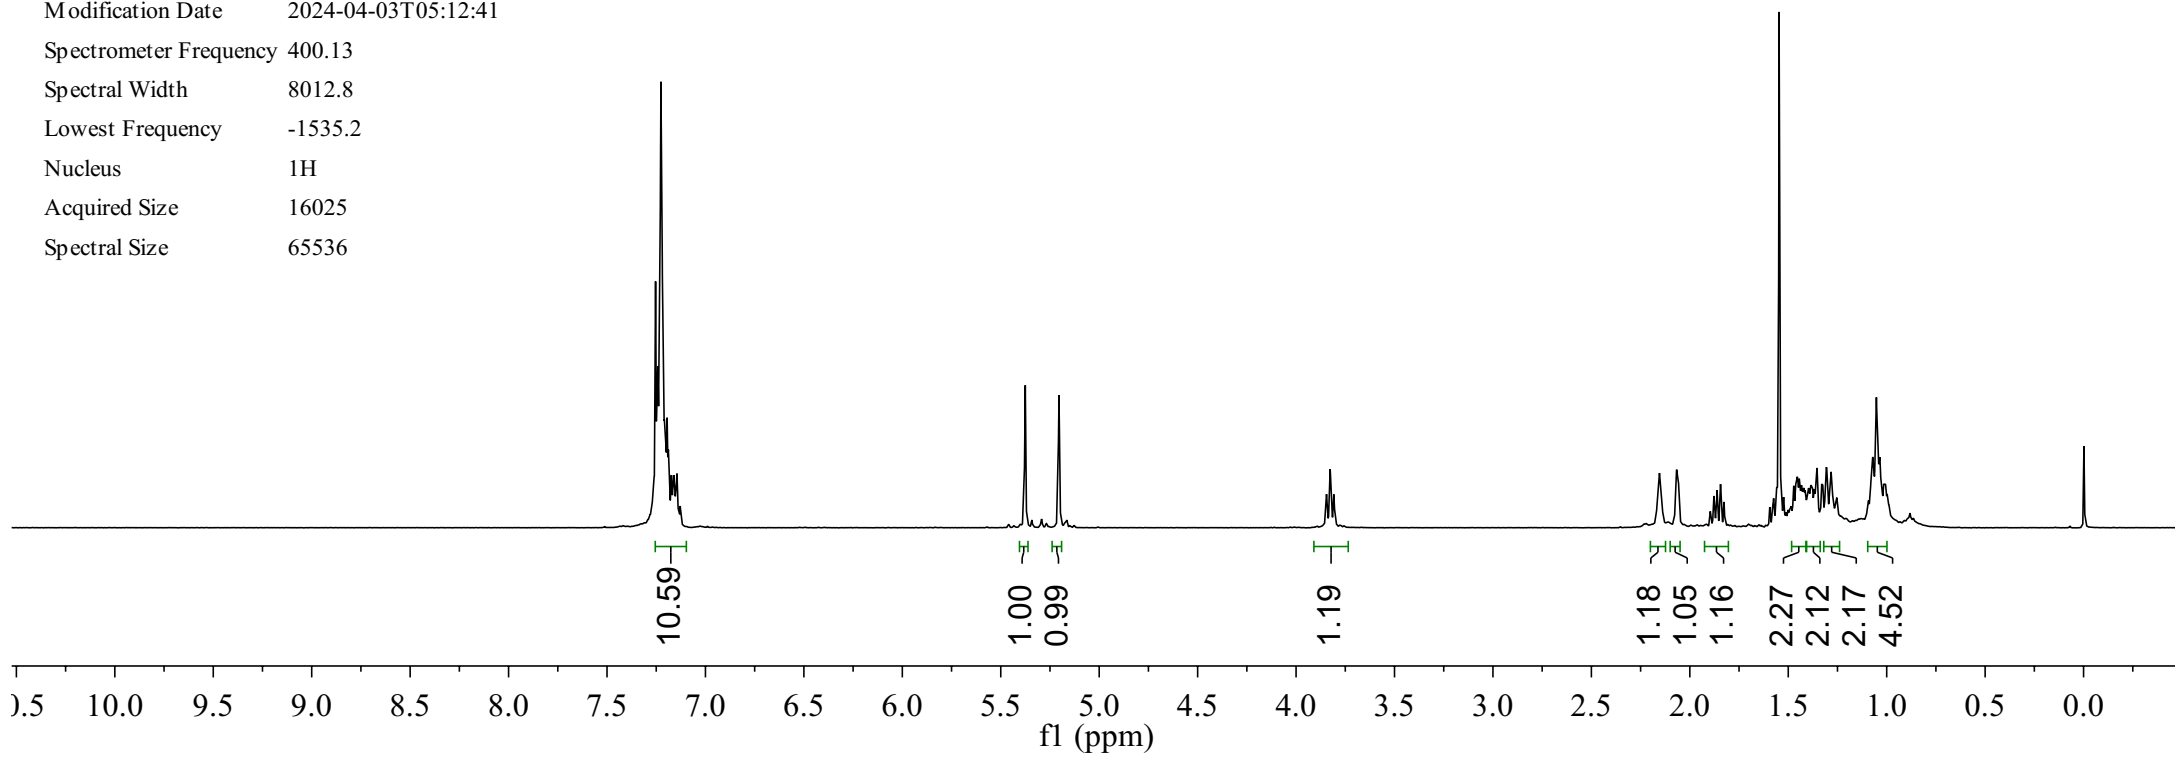

YM-20240331-1-iso.5.fid

s15      Parameter                      Value  
Title                      YM-20240331-1-iso.5.fid  
Comment                      s15  
Origin                      Bruker BioSpin GmbH  
Owner                      PC  
Site  
Instrument                      spect  
Solvent                      CDC13  
Temperature                      298.7  
Pulse Sequence                      zgpg30  
Experiment                      1D  
Number of Scans                      64  
Receiver Gain                      196.4  
Relaxation Delay                      2.0000  
Pulse Width                      10.2200  
Presaturation Frequency  
Acquisition Time                      1.3631  
Acquisition Date                      2024-04-08T13:27:03  
Modification Date                      2024-04-08T13:52:56  
Spectrometer Frequency                      100.62  
Spectral Width                      24038.5  
Lowest Frequency                      -1943.9  
Nucleus                      13C  
Acquired Size                      32768  
Spectral Size                      65536

151.9  
144.0  
143.0  
128.4  
128.3  
128.1  
127.2  
126.9  
126.2  
113.3

48.6  
42.6  
40.9  
39.7  
38.6  
36.7  
35.6  
30.2  
28.9

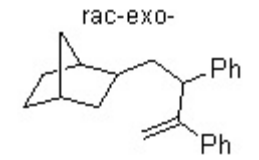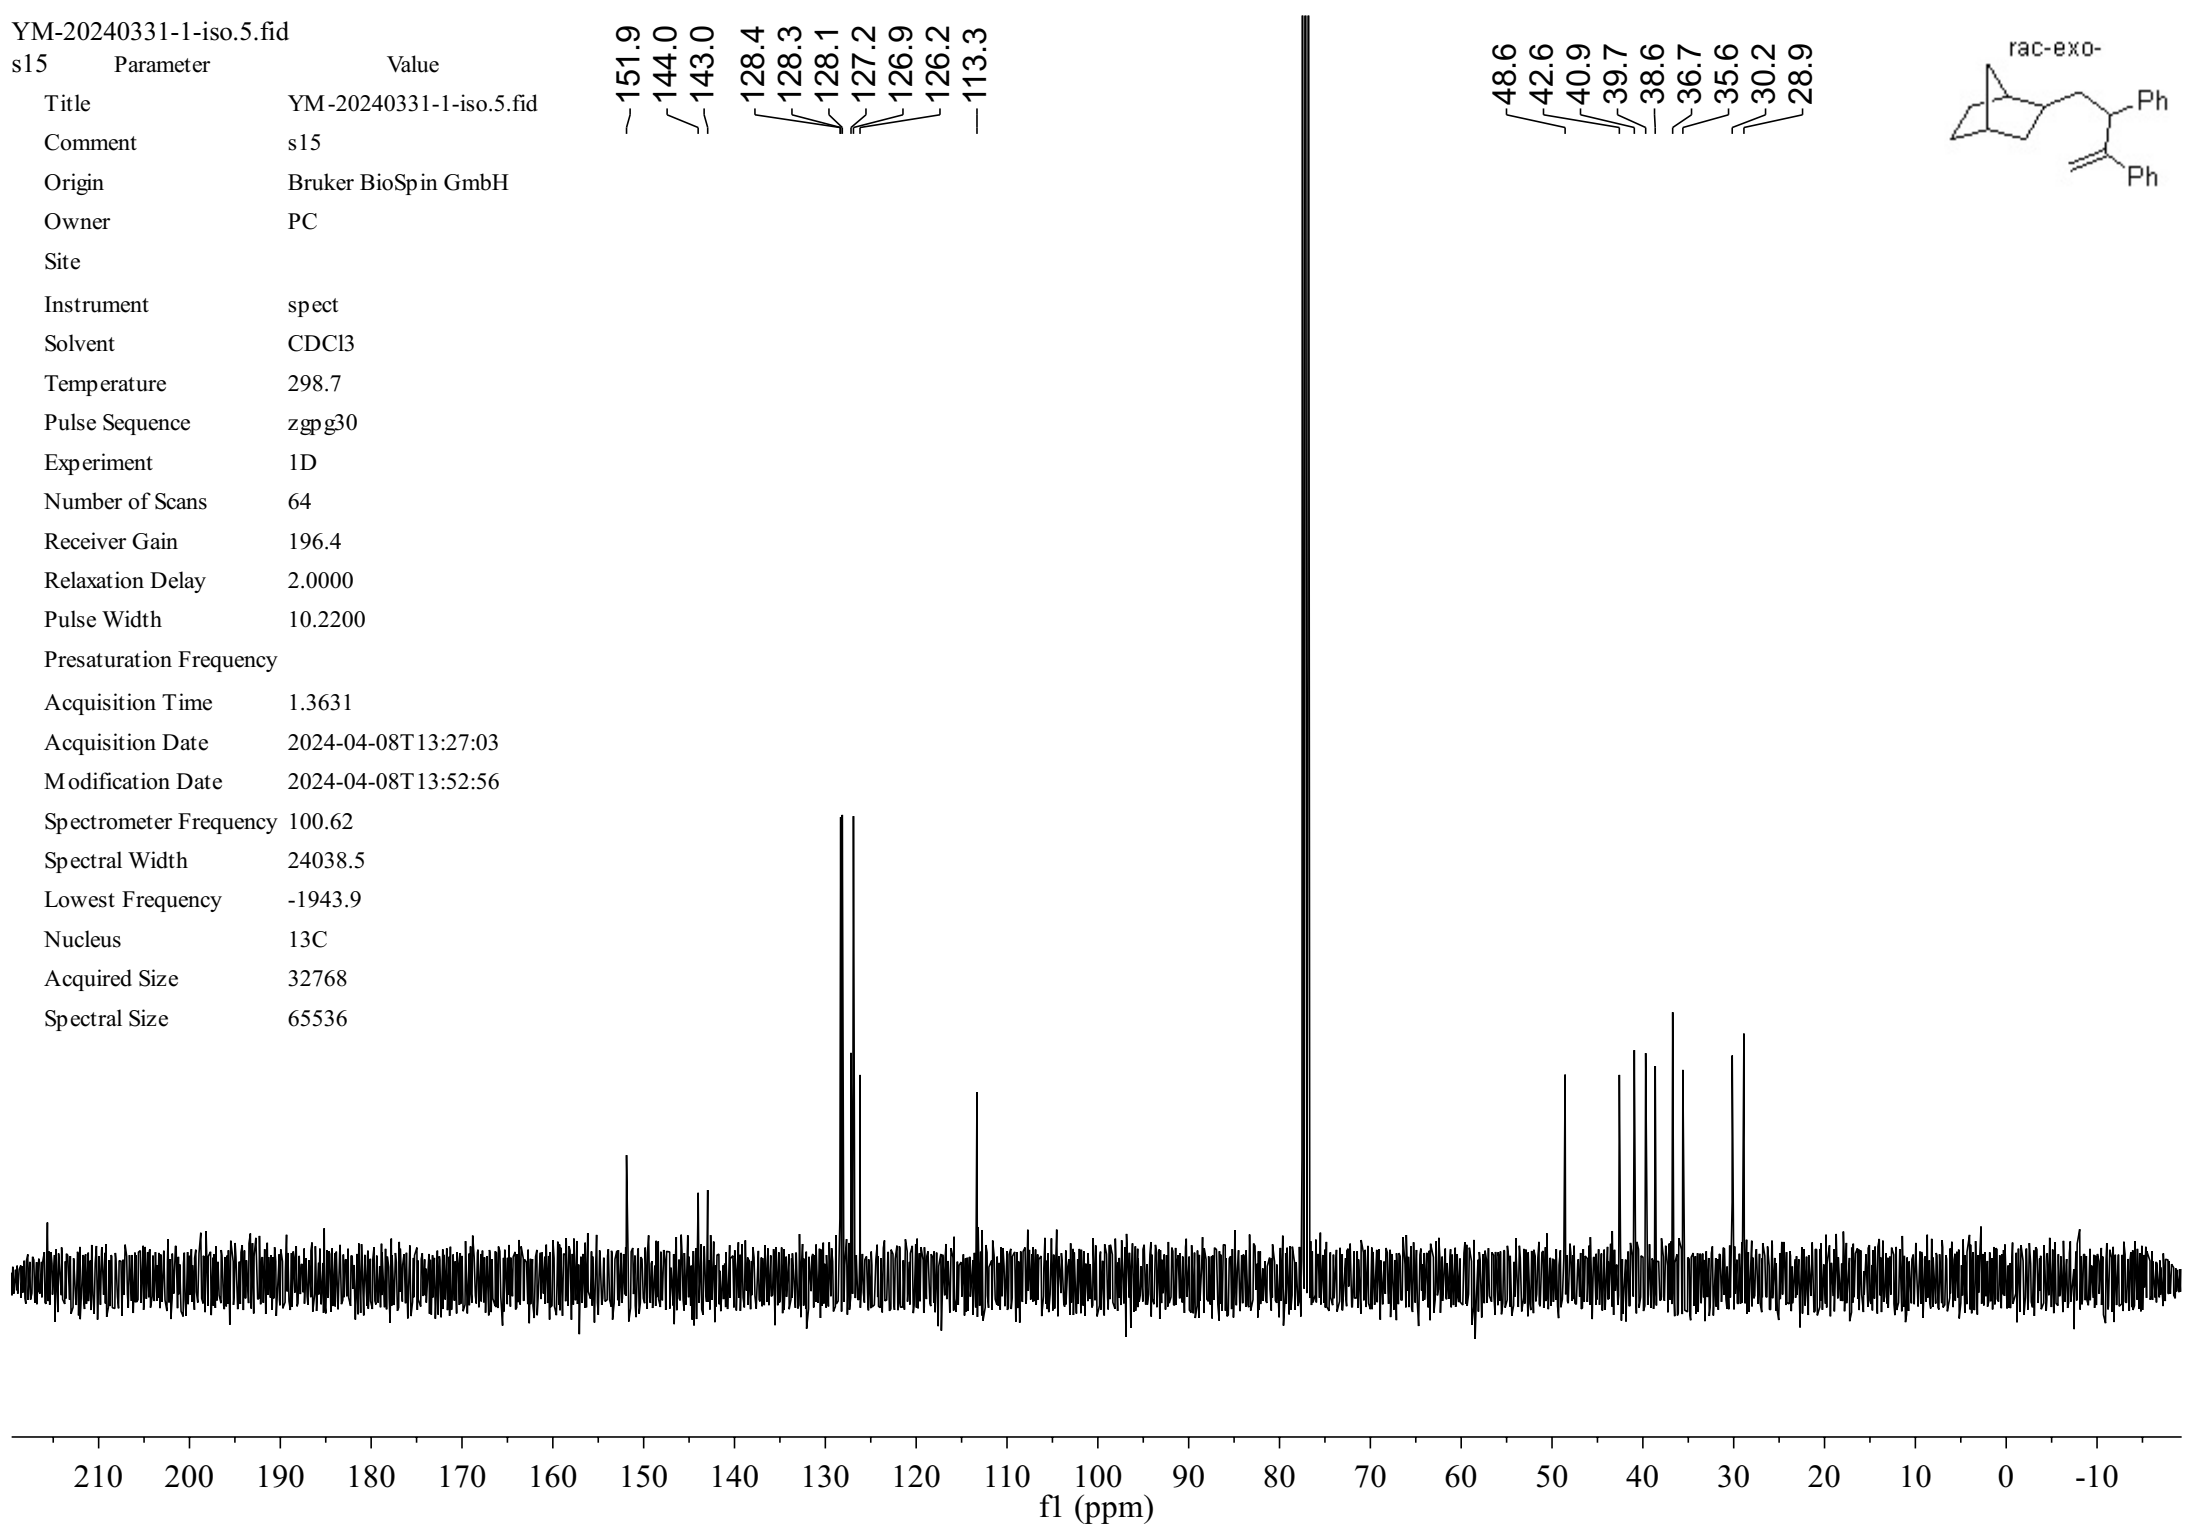

Cross hydroalkenylation Major Products in Table 2

YM-20240331-2-iso.11.fid

| Parameter               | Value                    |
|-------------------------|--------------------------|
| Title                   | YM-20240331-2-iso.11.fid |
| Comment                 | s5-6                     |
| Origin                  | Bruker BioSpin GmbH      |
| Owner                   | nmr                      |
| Site                    |                          |
| Instrument              | spect                    |
| Solvent                 | CDC13                    |
| Temperature             | 296.1                    |
| Pulse Sequence          | zg30                     |
| Experiment              | 1D                       |
| Number of Scans         | 16                       |
| Receiver Gain           | 70.5                     |
| Relaxation Delay        | 1.0000                   |
| Pulse Width             | 11.3200                  |
| Presaturation Frequency |                          |
| Acquisition Time        | 3.2768                   |
| Acquisition Date        | 2024-04-07T21:01:36      |
| Modification Date       | 2024-04-07T23:17:56      |
| Spectrometer Frequency  | 500.13                   |
| Spectral Width          | 10000.0                  |
| Lowest Frequency        | -1911.5                  |
| Nucleus                 | 1H                       |
| Acquired Size           | 32768                    |
| Spectral Size           | 65536                    |

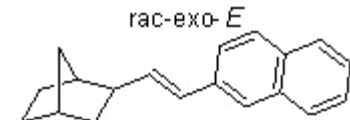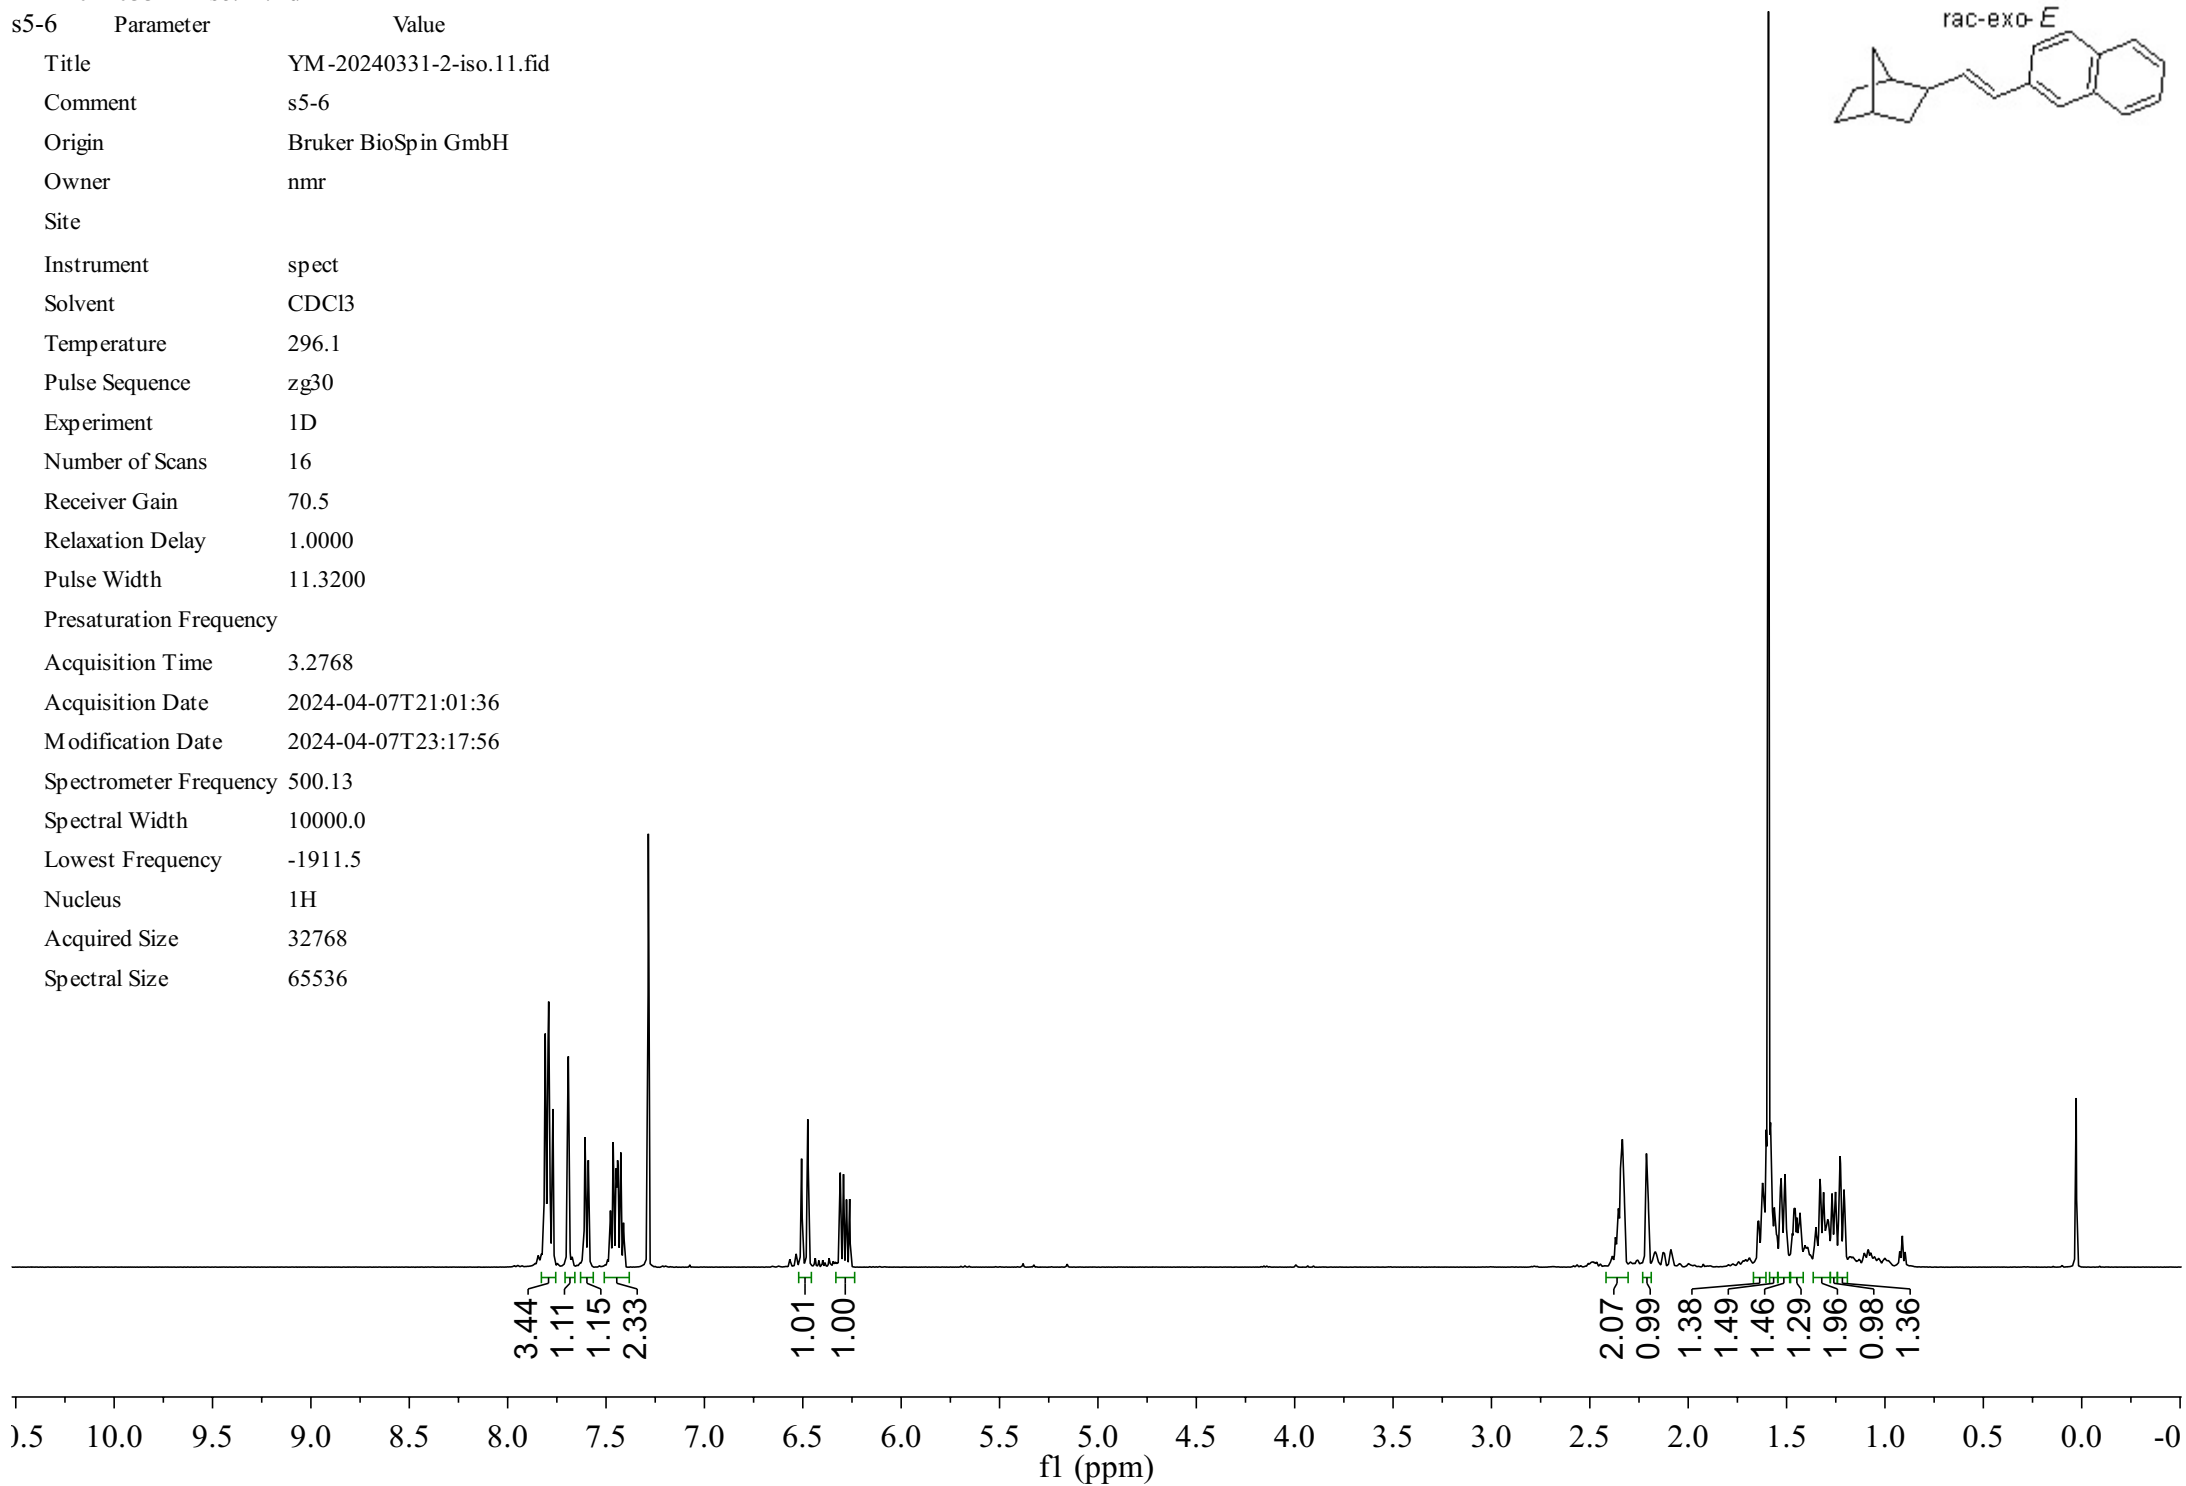

YM-20240331-2-iso.12.fid

s5-6

| Parameter               | Value                    |
|-------------------------|--------------------------|
| Title                   | YM-20240331-2-iso.12.fid |
| Comment                 | s5-6                     |
| Origin                  | Bruker BioSpin GmbH      |
| Owner                   | nmr                      |
| Site                    |                          |
| Instrument              | spect                    |
| Solvent                 | CDC13                    |
| Temperature             | 296.2                    |
| Pulse Sequence          | zgpg30                   |
| Experiment              | 1D                       |
| Number of Scans         | 48                       |
| Receiver Gain           | 193.1                    |
| Relaxation Delay        | 2.0000                   |
| Pulse Width             | 9.9400                   |
| Presaturation Frequency |                          |
| Acquisition Time        | 1.1010                   |
| Acquisition Date        | 2024-04-07T21:03:53      |
| Modification Date       | 2024-04-07T23:17:56      |
| Spectrometer Frequency  | 125.77                   |
| Spectral Width          | 29761.9                  |
| Lowest Frequency        | -2289.5                  |
| Nucleus                 | <sup>13</sup> C          |
| Acquired Size           | 32768                    |
| Spectral Size           | 65536                    |

137.1  
135.6  
133.9  
132.7  
128.1  
127.9  
127.7  
127.5  
126.2  
125.5  
125.4  
123.7

45.7  
42.9  
38.1  
36.8  
36.0  
29.9  
29.2

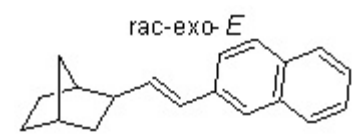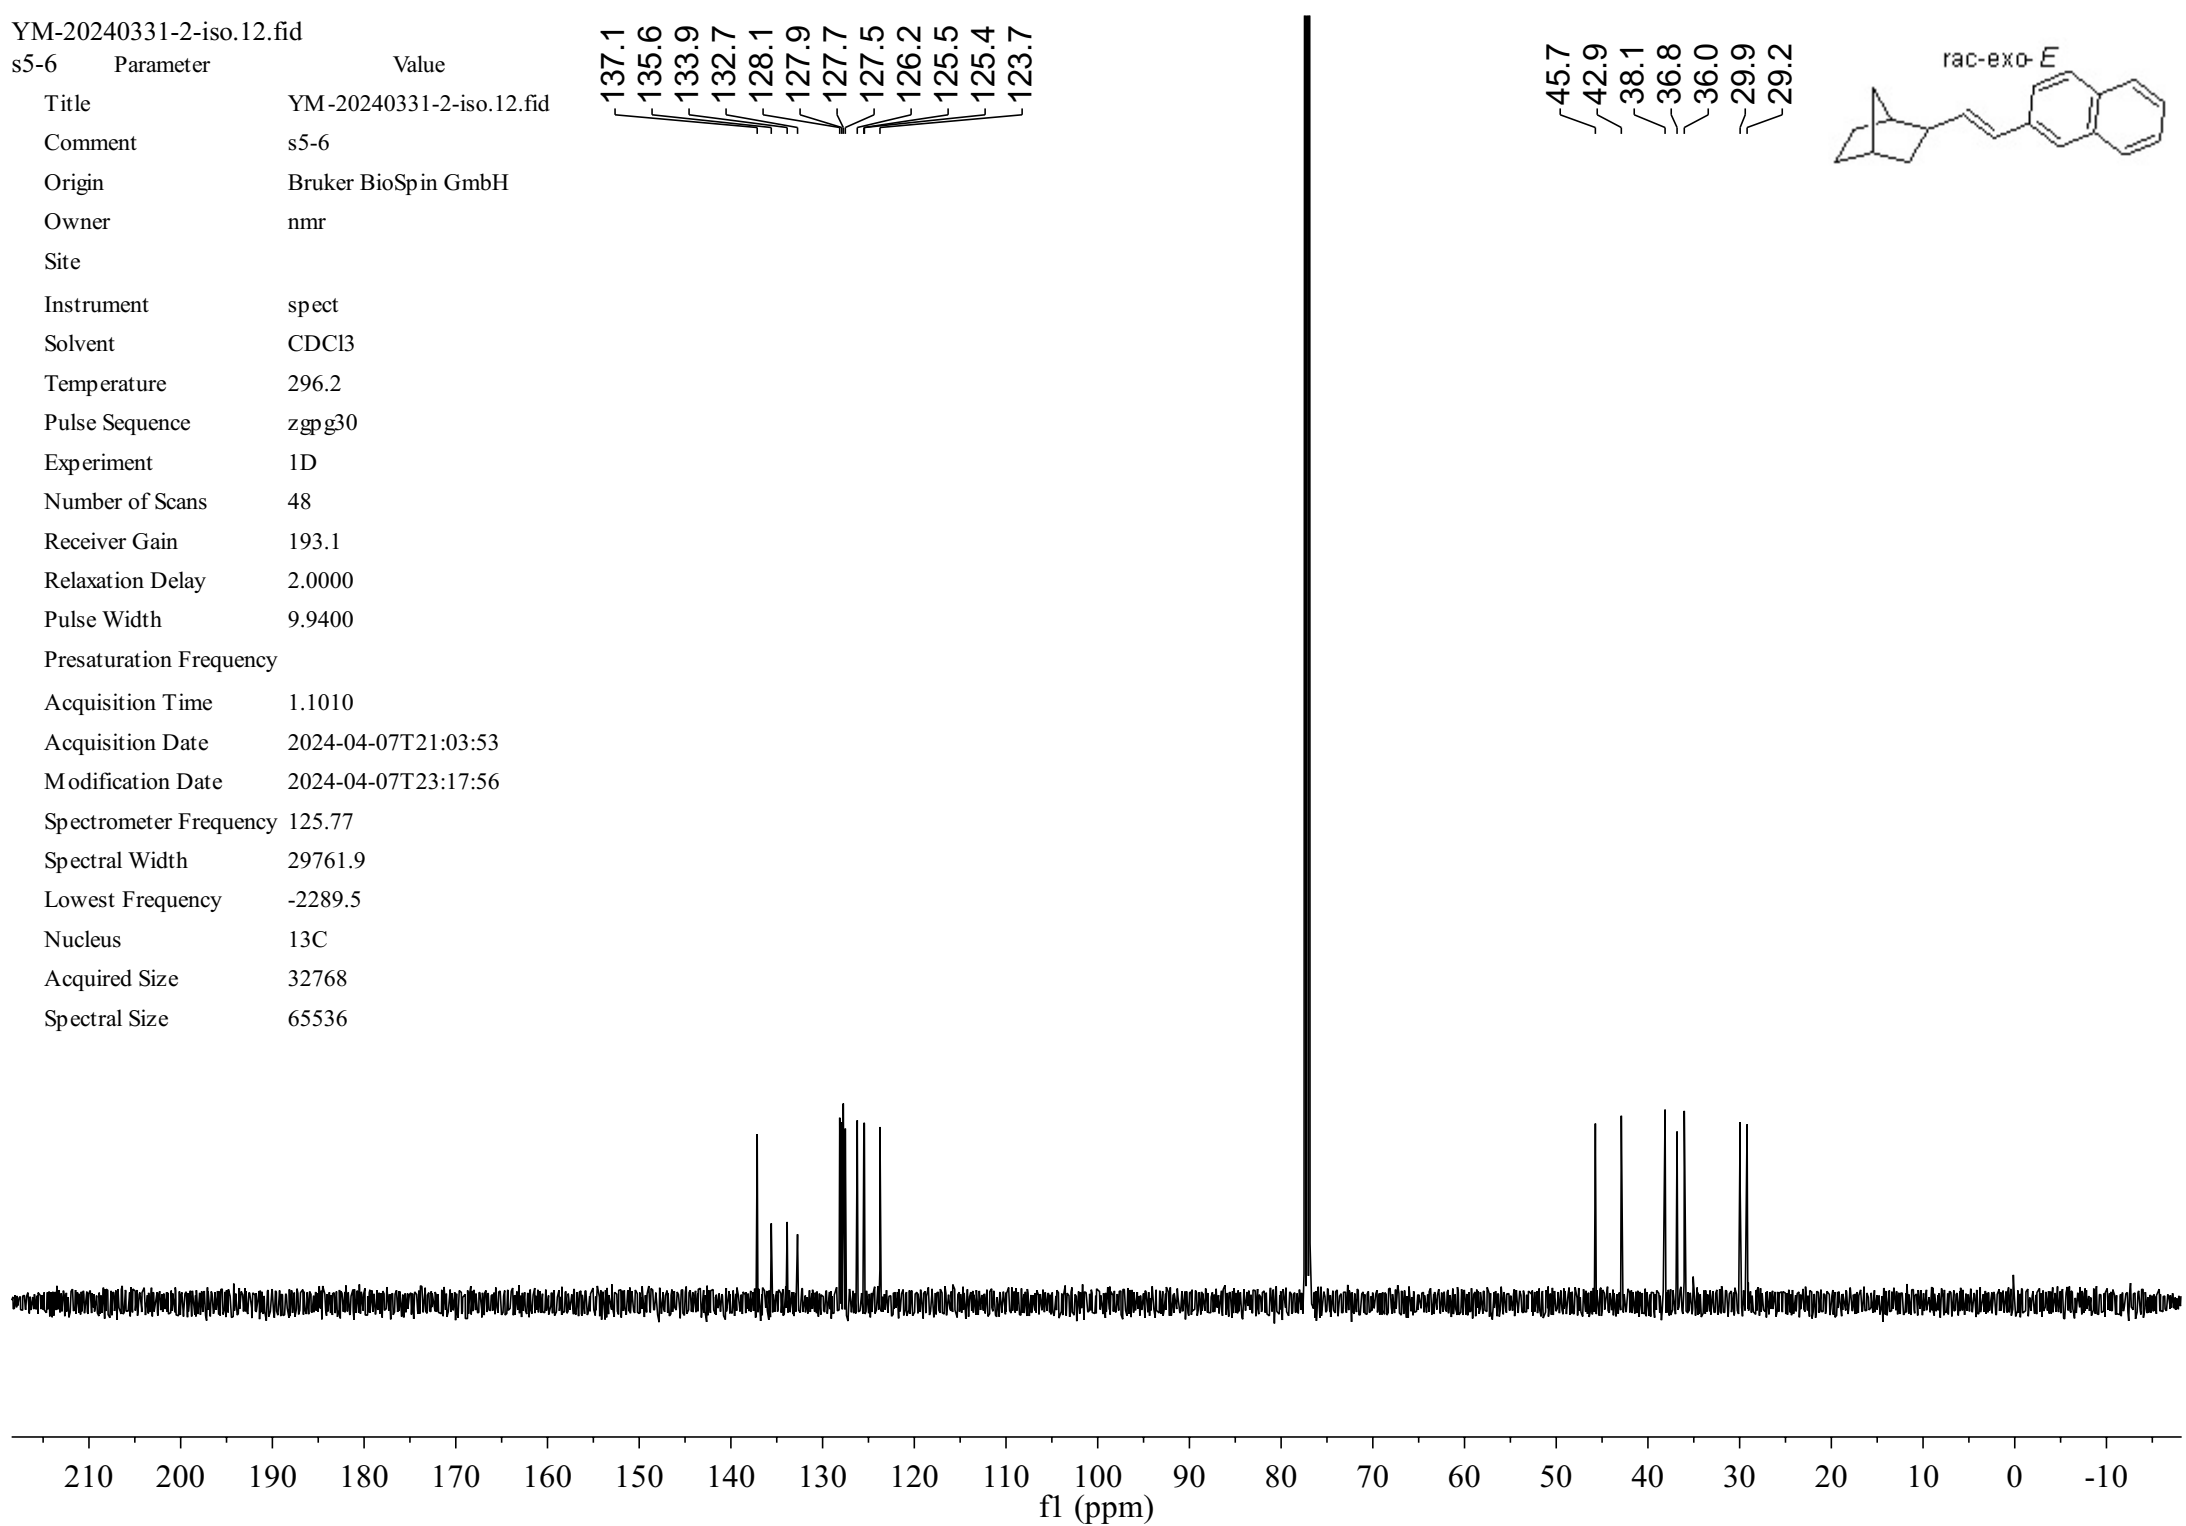

YM-20240402-3-isoa.4.fid

| s7 | Parameter               | Value                    |
|----|-------------------------|--------------------------|
|    | Title                   | YM-20240402-3-isoa.4.fid |
|    | Comment                 | s7                       |
|    | Origin                  | Bruker BioSpin GmbH      |
|    | Owner                   | PC                       |
|    | Site                    |                          |
|    | Instrument              | spect                    |
|    | Solvent                 | CDC13                    |
|    | Temperature             | 297.8                    |
|    | Pulse Sequence          | zg30                     |
|    | Experiment              | 1D                       |
|    | Number of Scans         | 8                        |
|    | Receiver Gain           | 111.4                    |
|    | Relaxation Delay        | 1.0000                   |
|    | Pulse Width             | 9.2600                   |
|    | Presaturation Frequency |                          |
|    | Acquisition Time        | 1.9999                   |
|    | Acquisition Date        | 2024-04-08T21:22:09      |
|    | Modification Date       | 2024-04-09T09:40:31      |
|    | Spectrometer Frequency  | 400.13                   |
|    | Spectral Width          | 8012.8                   |
|    | Lowest Frequency        | -1535.2                  |
|    | Nucleus                 | 1H                       |
|    | Acquired Size           | 16025                    |
|    | Spectral Size           | 65536                    |

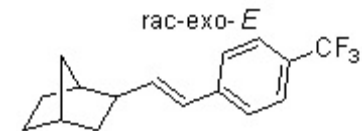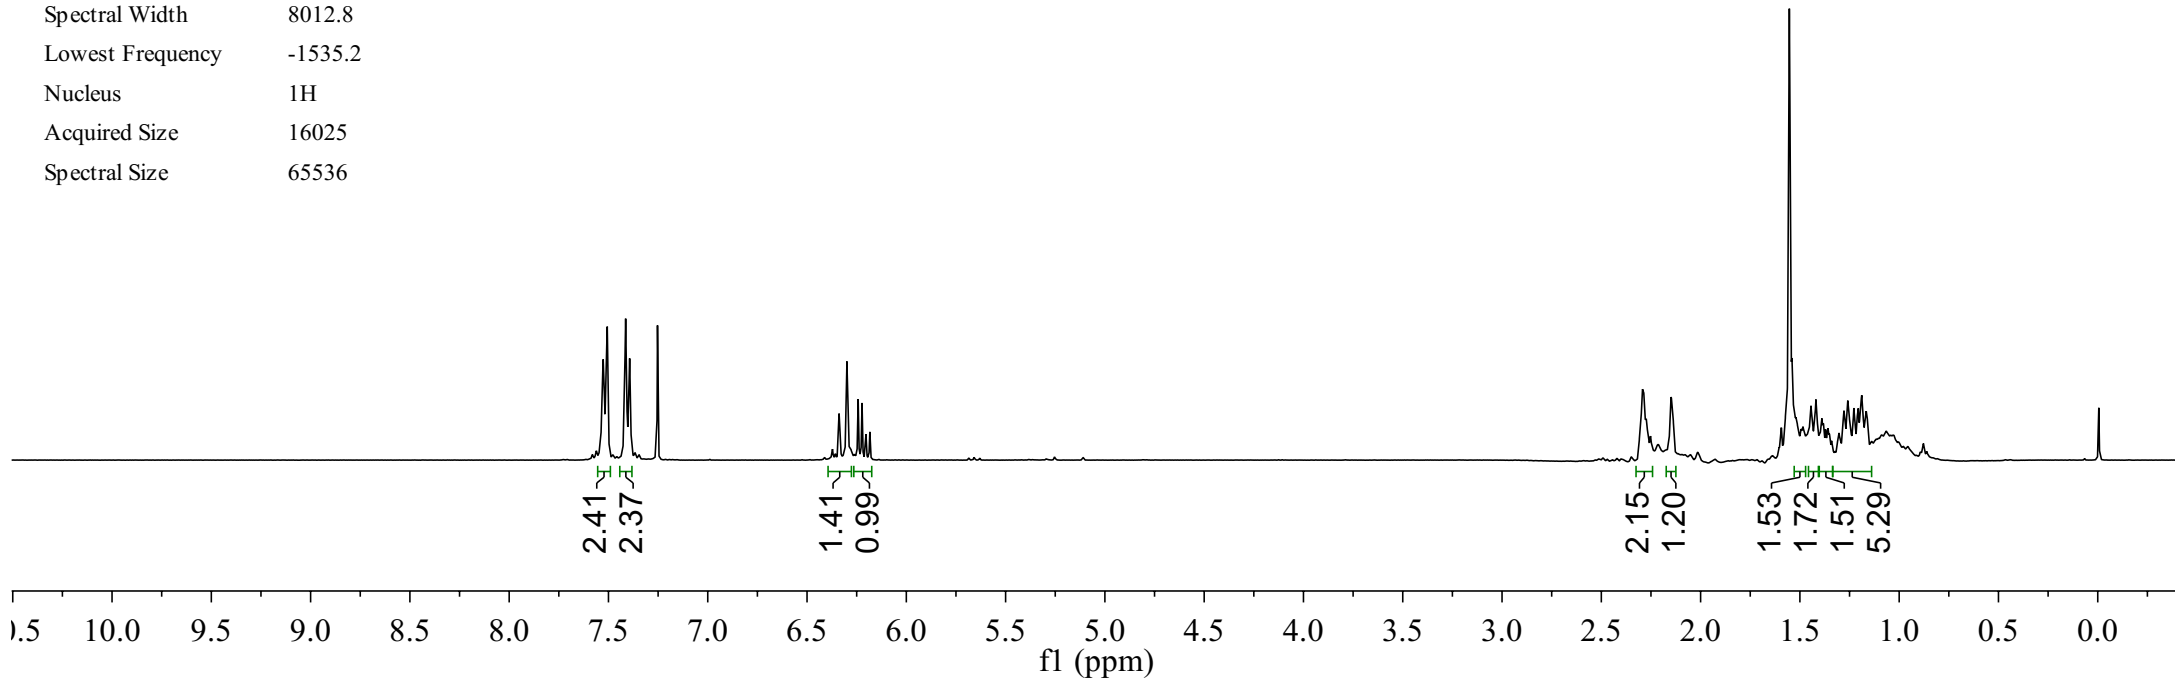

YM-20240402-3-isoa.6.fid

| Parameter               | Value                    |
|-------------------------|--------------------------|
| Title                   | YM-20240402-3-isoa.6.fid |
| Comment                 | s7                       |
| Origin                  | Bruker BioSpin GmbH      |
| Owner                   | PC                       |
| Site                    |                          |
| Instrument              | spect                    |
| Solvent                 | CDC13                    |
| Temperature             | 298.0                    |
| Pulse Sequence          | zgpg30                   |
| Experiment              | 1D                       |
| Number of Scans         | 88                       |
| Receiver Gain           | 196.4                    |
| Relaxation Delay        | 2.0000                   |
| Pulse Width             | 10.2200                  |
| Presaturation Frequency |                          |
| Acquisition Time        | 1.2976                   |
| Acquisition Date        | 2024-04-08T21:27:51      |
| Modification Date       | 2024-04-09T09:40:31      |
| Spectrometer Frequency  | 100.62                   |
| Spectral Width          | 25252.5                  |
| Lowest Frequency        | -537.4                   |
| Nucleus                 | <sup>13</sup> C          |
| Acquired Size           | 32768                    |
| Spectral Size           | 65536                    |

— 139.3  
126.3  
126.2  
125.6  
125.5

45.6  
42.8  
37.9  
36.8  
36.0  
29.9  
29.1

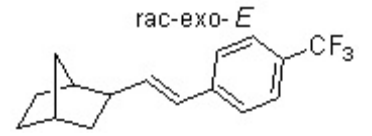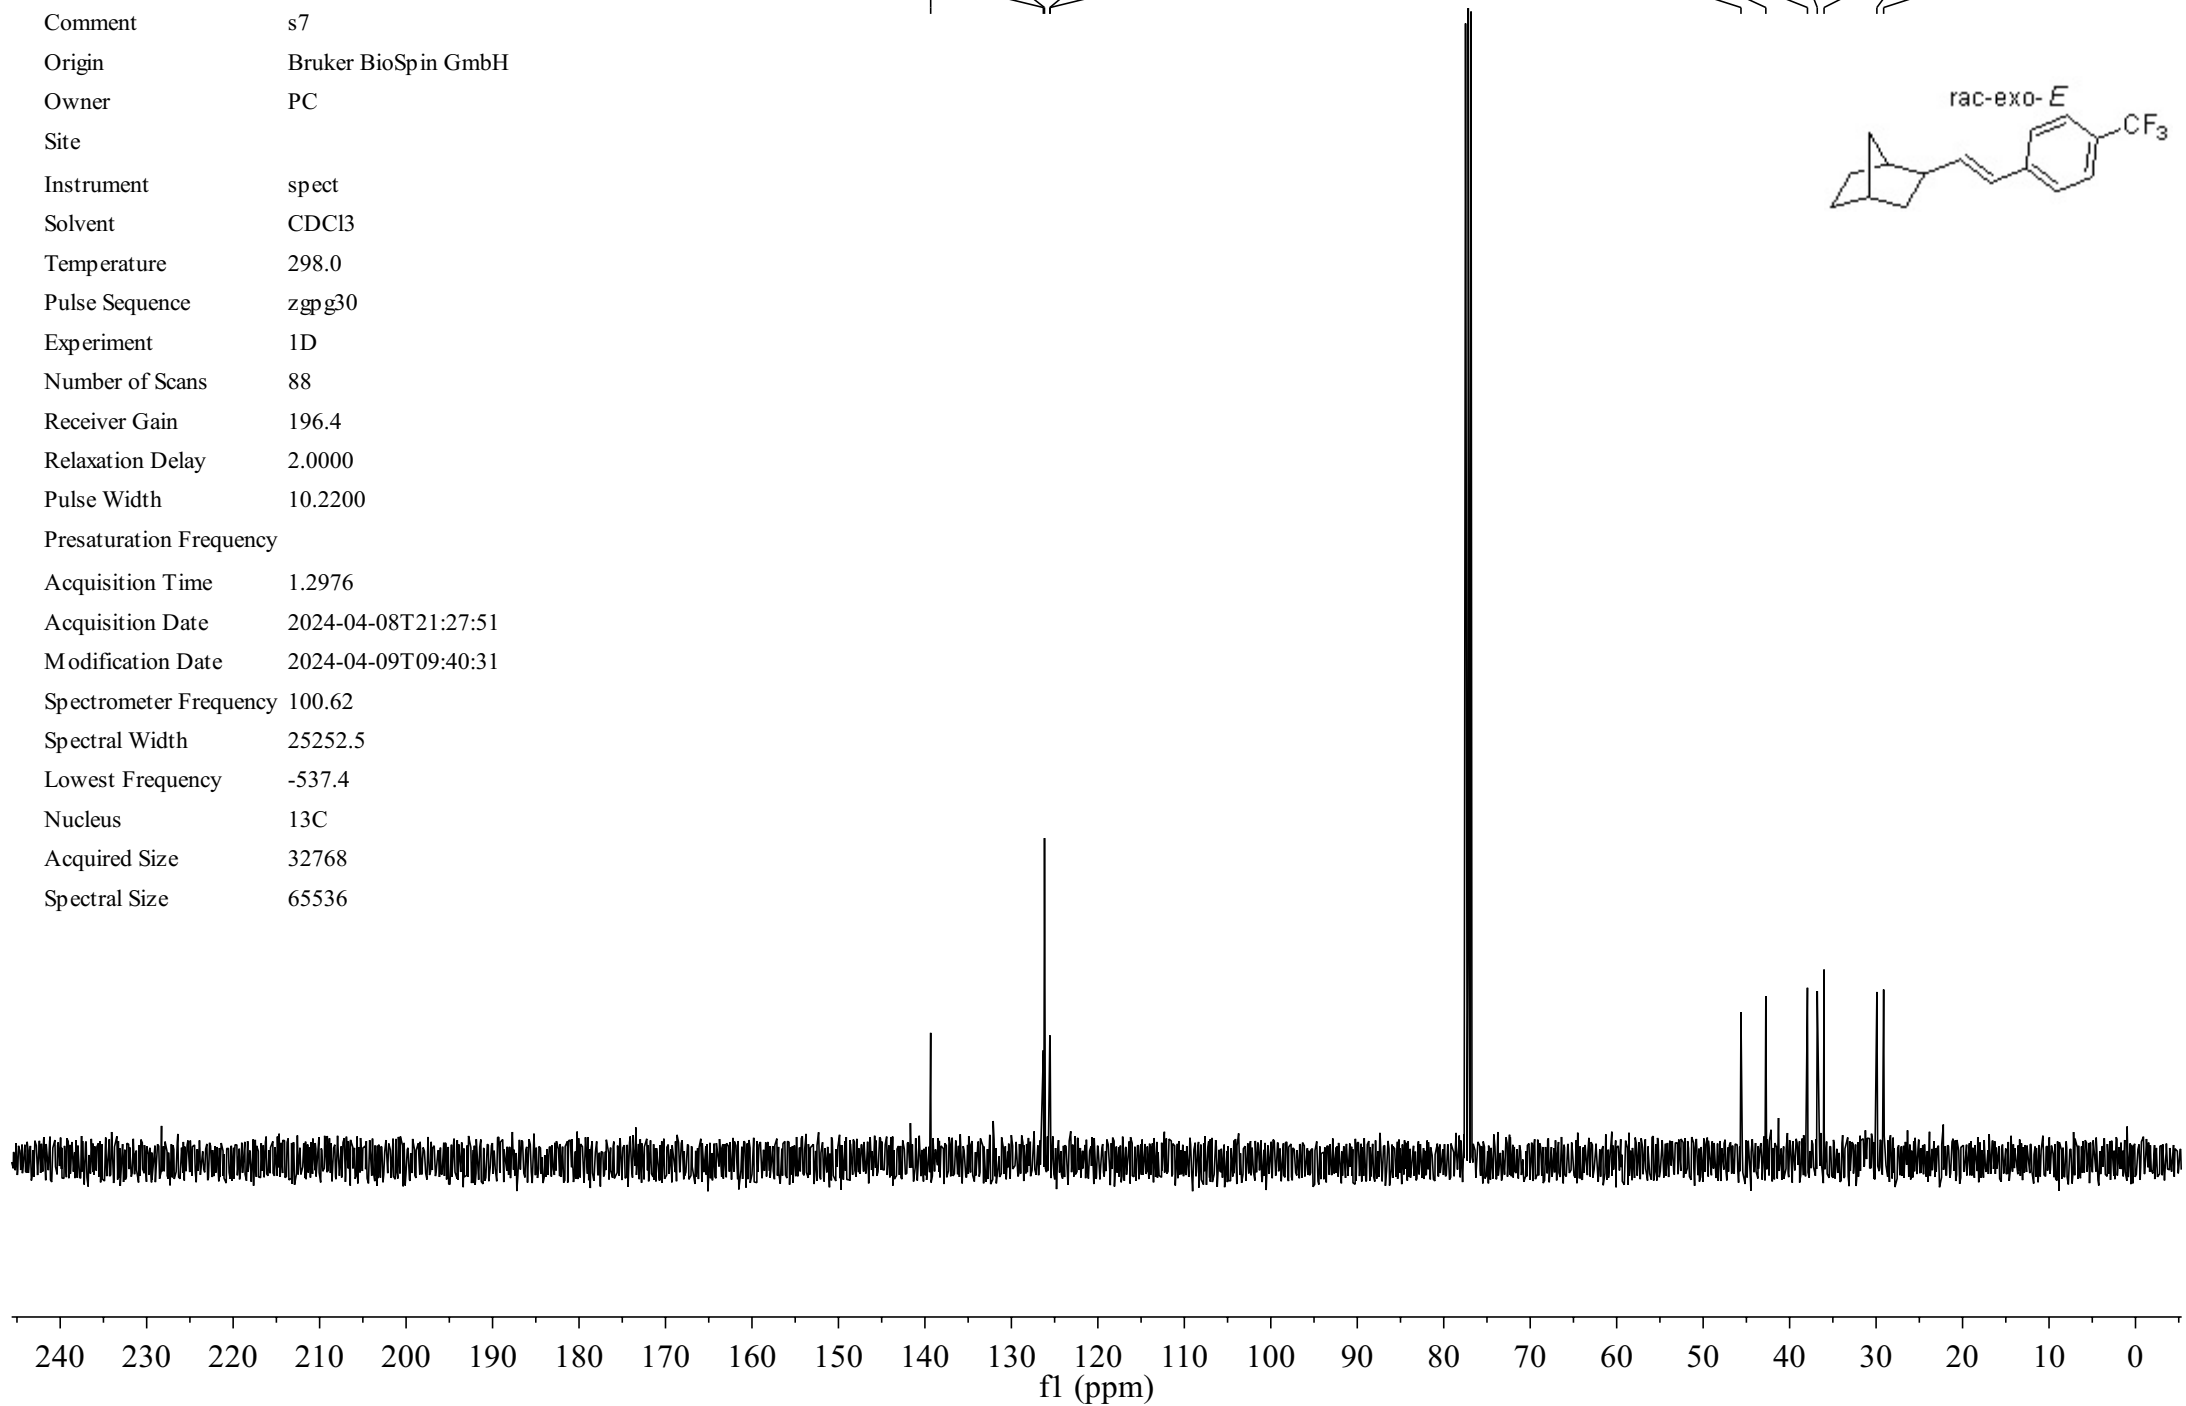

YM-20240402-3-isoa.5.fid

| Parameter               | Value                    |
|-------------------------|--------------------------|
| Title                   | YM-20240402-3-isoa.5.fid |
| Comment                 | s7                       |
| Origin                  | Bruker BioSpin GmbH      |
| Owner                   | PC                       |
| Site                    |                          |
| Instrument              | spect                    |
| Solvent                 | CDCI3                    |
| Temperature             | 297.8                    |
| Pulse Sequence          | zgfgq                    |
| Experiment              | 1D                       |
| Number of Scans         | 16                       |
| Receiver Gain           | 196.4                    |
| Relaxation Delay        | 1.0000                   |
| Pulse Width             | 16.4100                  |
| Presaturation Frequency |                          |
| Acquisition Time        | 0.7340                   |
| Acquisition Date        | 2024-04-08T21:25:07      |
| Modification Date       | 2024-04-09T09:40:31      |
| Spectrometer Frequency  | 376.46                   |
| Spectral Width          | 89285.7                  |
| Lowest Frequency        | -82292.7                 |
| Nucleus                 | 19F                      |
| Acquired Size           | 65536                    |
| Spectral Size           | 131072                   |

62.4

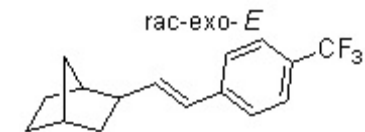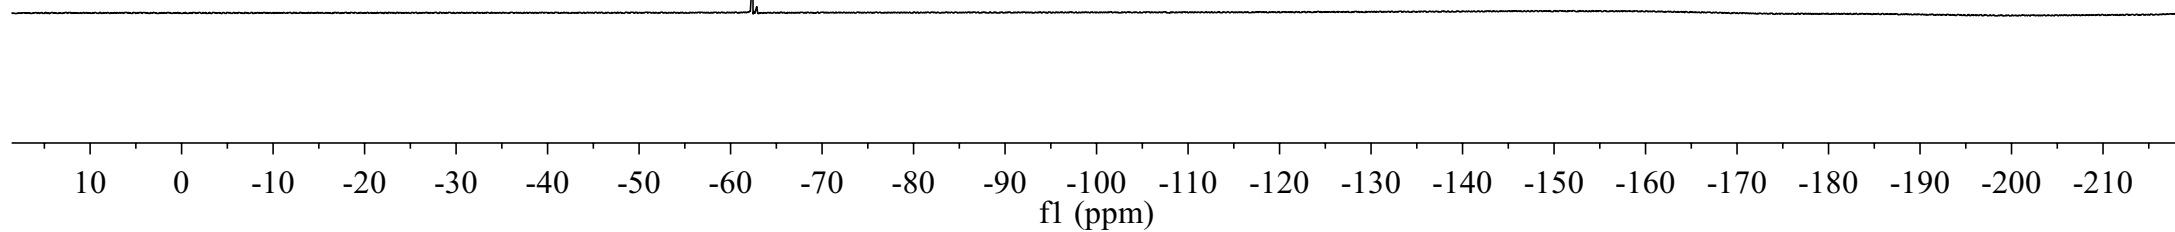



YM-20240402-2-iso.2.fid

| Parameter               | Value                   |
|-------------------------|-------------------------|
| Title                   | YM-20240402-2-iso.2.fid |
| Comment                 | s18-22                  |
| Origin                  | Bruker BioSpin GmbH     |
| Owner                   | PC                      |
| Site                    |                         |
| Instrument              | spect                   |
| Solvent                 | CDC13                   |
| Temperature             | 298.3                   |
| Pulse Sequence          | zg30                    |
| Experiment              | 1D                      |
| Number of Scans         | 8                       |
| Receiver Gain           | 62.3                    |
| Relaxation Delay        | 1.0000                  |
| Pulse Width             | 9.2600                  |
| Presaturation Frequency |                         |
| Acquisition Time        | 1.9999                  |
| Acquisition Date        | 2024-04-08T13:06:47     |
| Modification Date       | 2024-04-08T13:52:51     |
| Spectrometer Frequency  | 400.13                  |
| Spectral Width          | 8012.8                  |
| Lowest Frequency        | -1535.2                 |
| Nucleus                 | <sup>1</sup> H          |
| Acquired Size           | 16025                   |
| Spectral Size           | 65536                   |

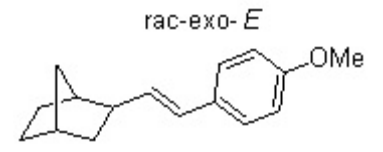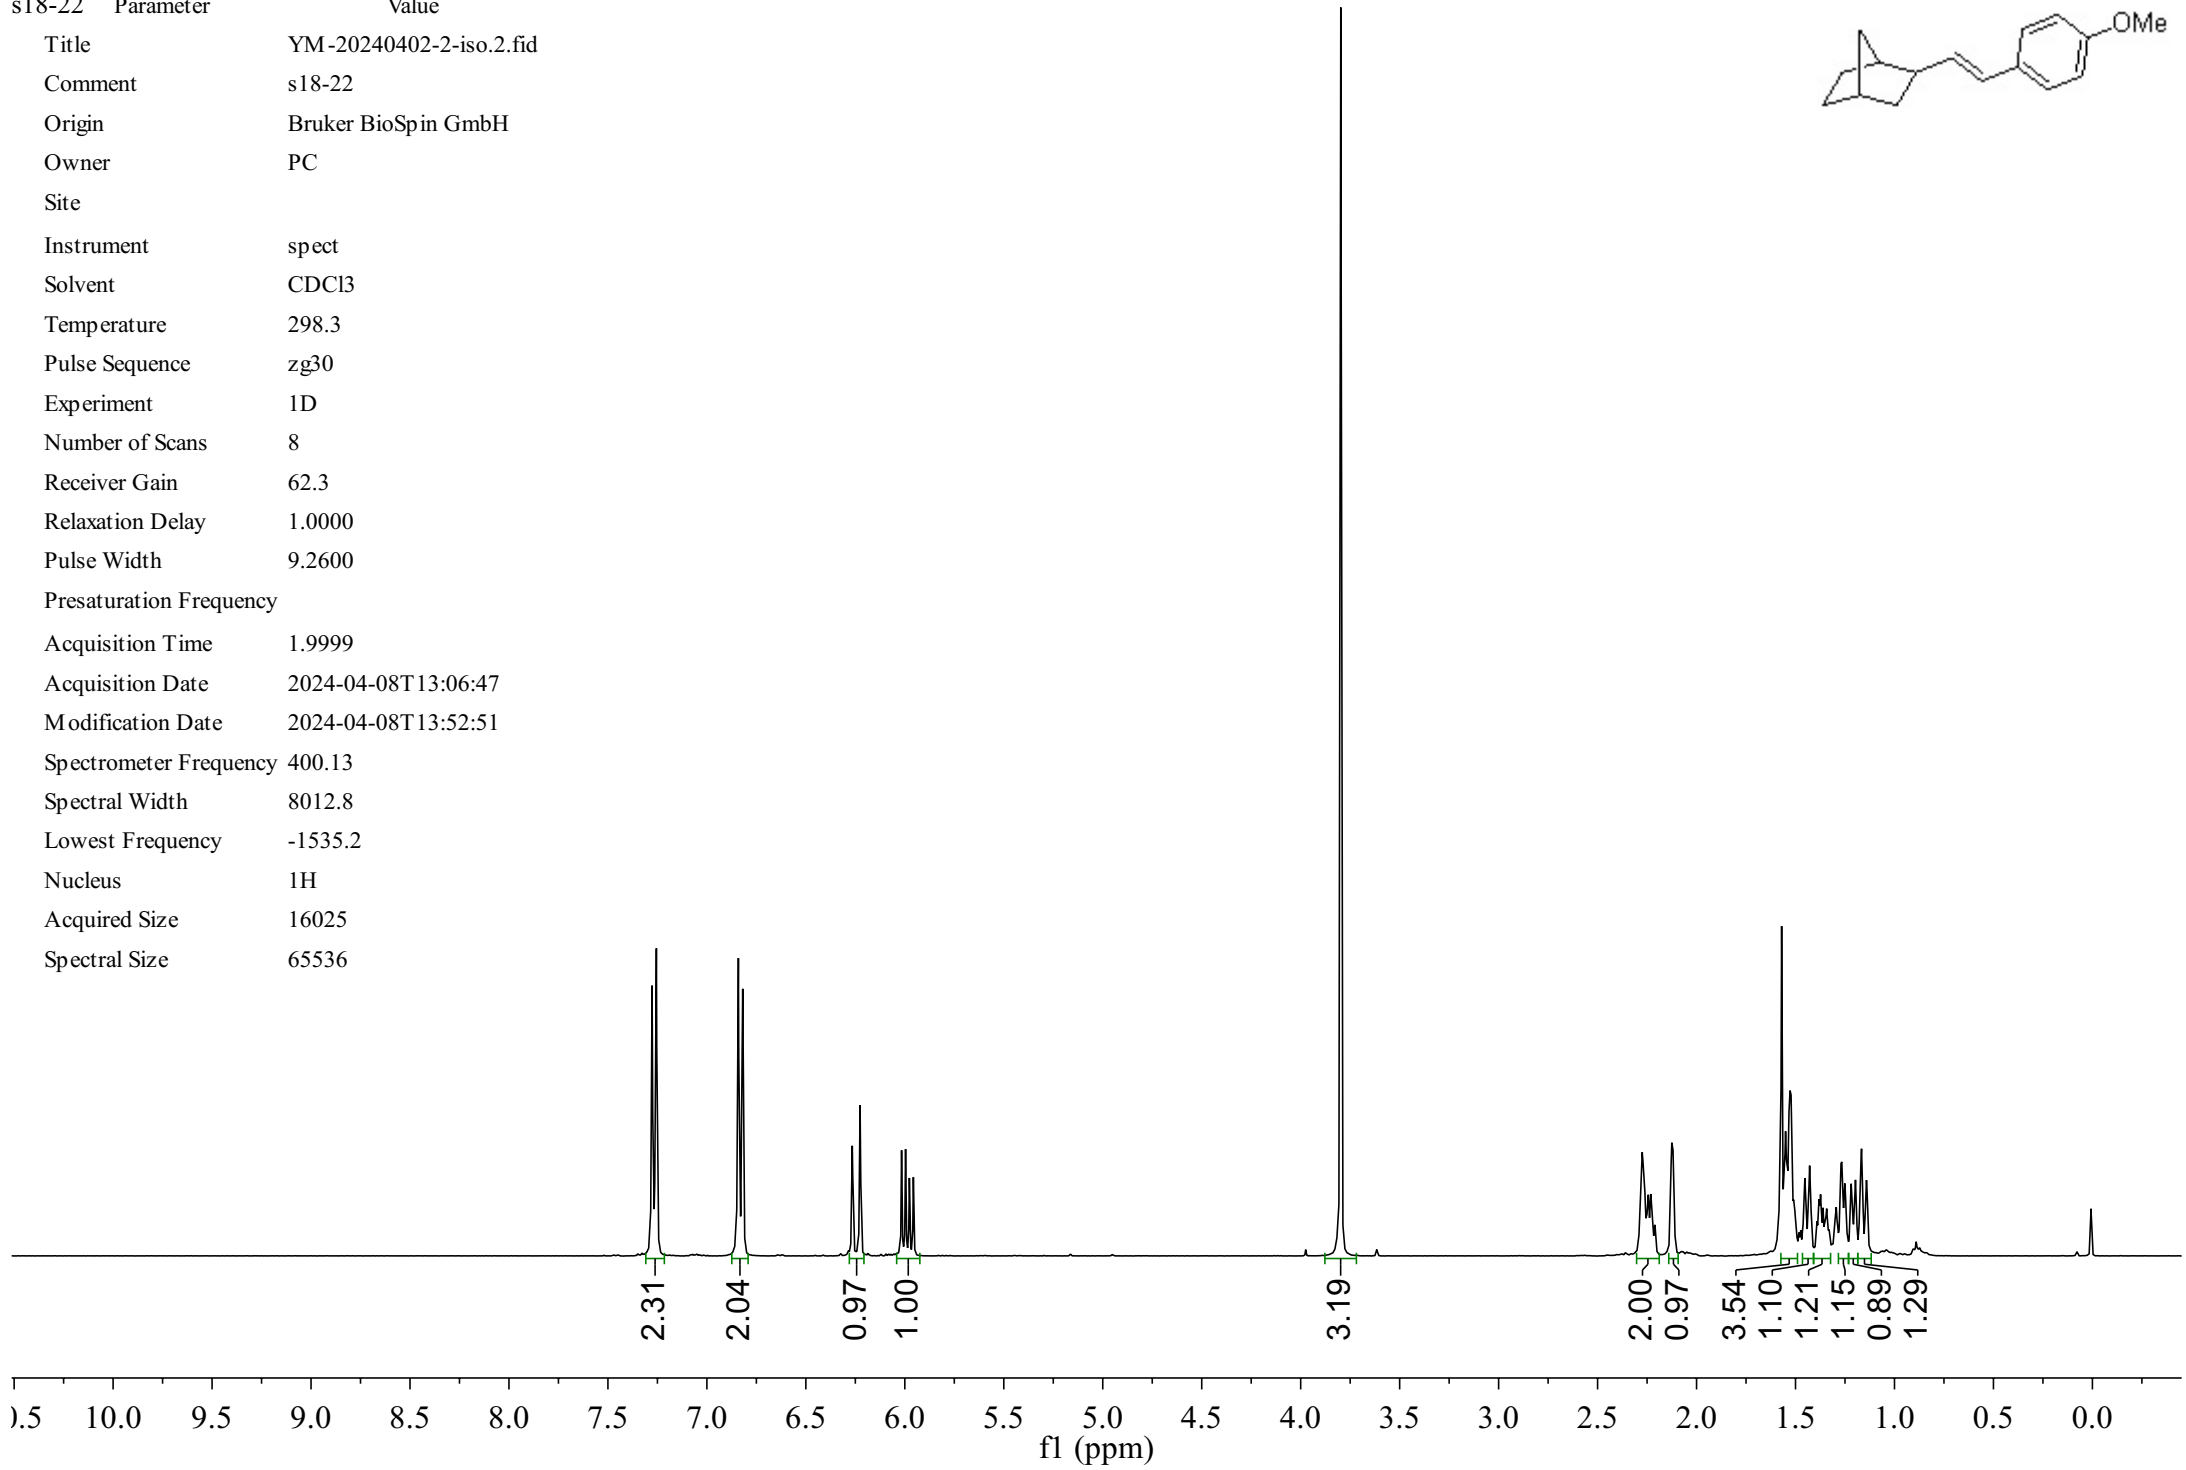

YM-20240402-2-iso.3.fid

| Parameter               | Value                   |
|-------------------------|-------------------------|
| Title                   | YM-20240402-2-iso.3.fid |
| Comment                 | s18-22                  |
| Origin                  | Bruker BioSpin GmbH     |
| Owner                   | PC                      |
| Site                    |                         |
| Instrument              | spect                   |
| Solvent                 | CDC13                   |
| Temperature             | 298.7                   |
| Pulse Sequence          | zgpg30                  |
| Experiment              | 1D                      |
| Number of Scans         | 48                      |
| Receiver Gain           | 196.4                   |
| Relaxation Delay        | 2.0000                  |
| Pulse Width             | 10.2200                 |
| Presaturation Frequency |                         |
| Acquisition Time        | 1.3631                  |
| Acquisition Date        | 2024-04-08T13:09:26     |
| Modification Date       | 2024-04-08T13:52:51     |
| Spectrometer Frequency  | 100.62                  |
| Spectral Width          | 24038.5                 |
| Lowest Frequency        | -1944.3                 |
| Nucleus                 | <sup>13</sup> C         |
| Acquired Size           | 32768                   |
| Spectral Size           | 65536                   |

158.7  
134.6  
131.0  
127.1  
126.7  
114.0  
55.4  
45.6  
42.9  
38.2  
36.8  
36.0  
29.9  
29.2

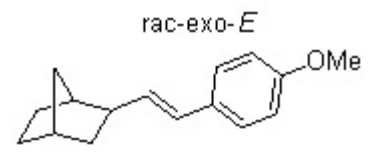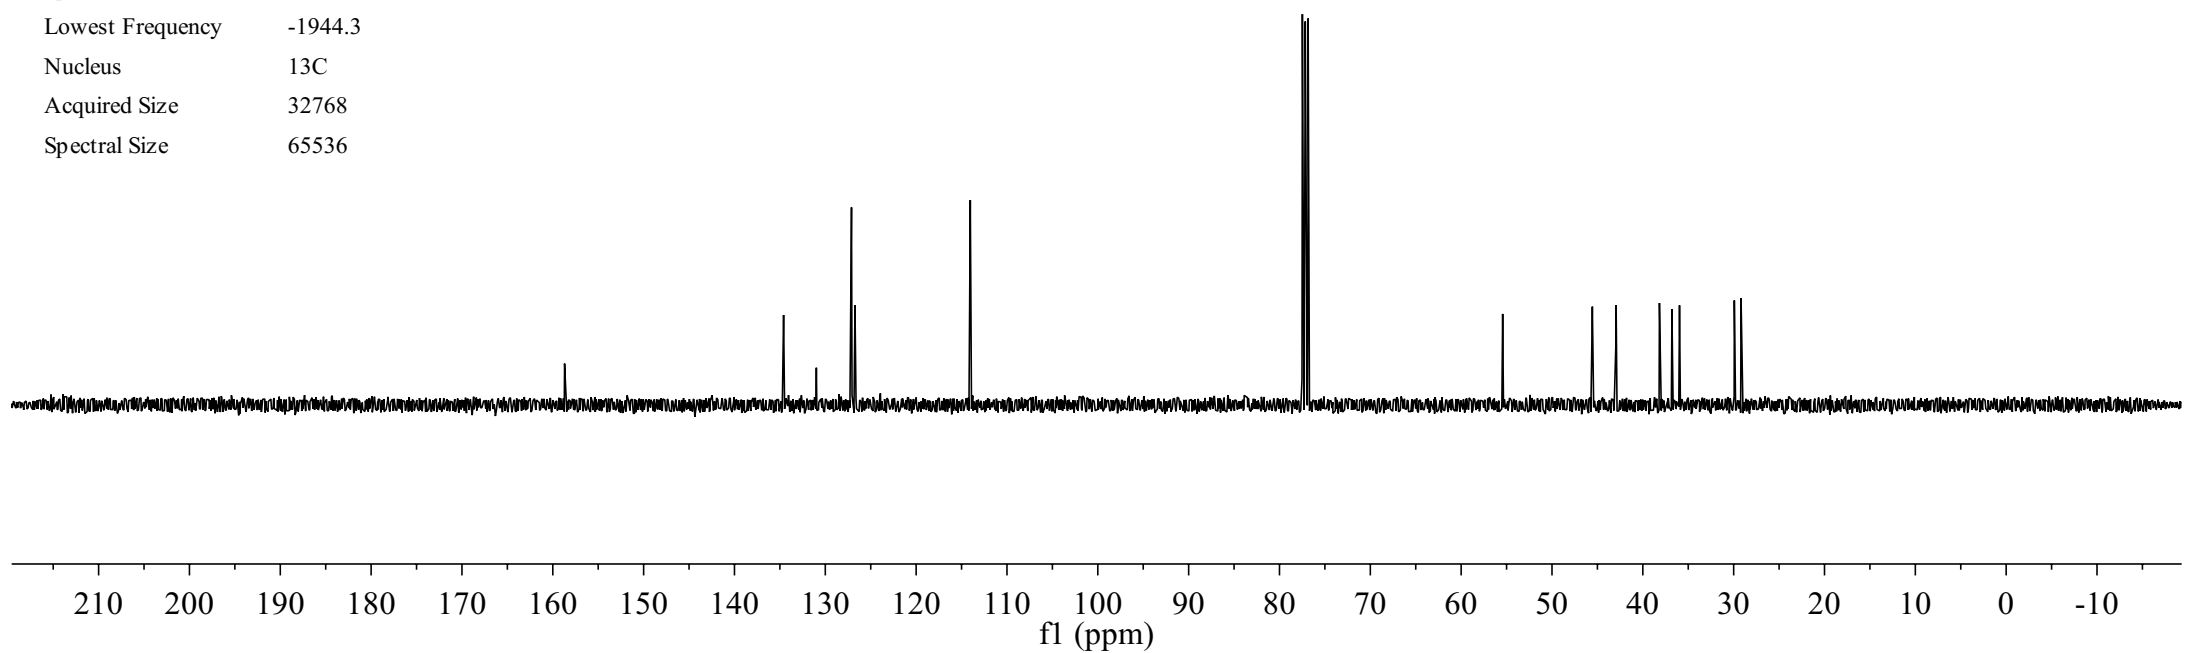

YM-20210506-1-2-s7.1.fid

| Parameter               | Value                    |
|-------------------------|--------------------------|
| Title                   | YM-20210506-1-2-s7.1.fid |
| Comment                 |                          |
| Origin                  | Bruker BioSpin GmbH      |
| Owner                   | nmr                      |
| Site                    |                          |
| Instrument              | spect                    |
| Solvent                 | CDC13                    |
| Temperature             | 297.8                    |
| Pulse Sequence          | zg30                     |
| Experiment              | 1D                       |
| Number of Scans         | 8                        |
| Receiver Gain           | 126.1                    |
| Relaxation Delay        | 10.0000                  |
| Pulse Width             | 9.1500                   |
| Presaturation Frequency |                          |
| Acquisition Time        | 1.9999                   |
| Acquisition Date        | 2021-05-08T13:12:33      |
| Modification Date       | 2022-01-07T20:25:22      |
| Spectrometer Frequency  | 400.13                   |
| Spectral Width          | 8012.8                   |
| Lowest Frequency        | -1549.0                  |
| Nucleus                 | 1H                       |
| Acquired Size           | 16025                    |
| Spectral Size           | 65536                    |

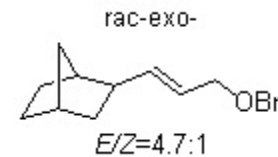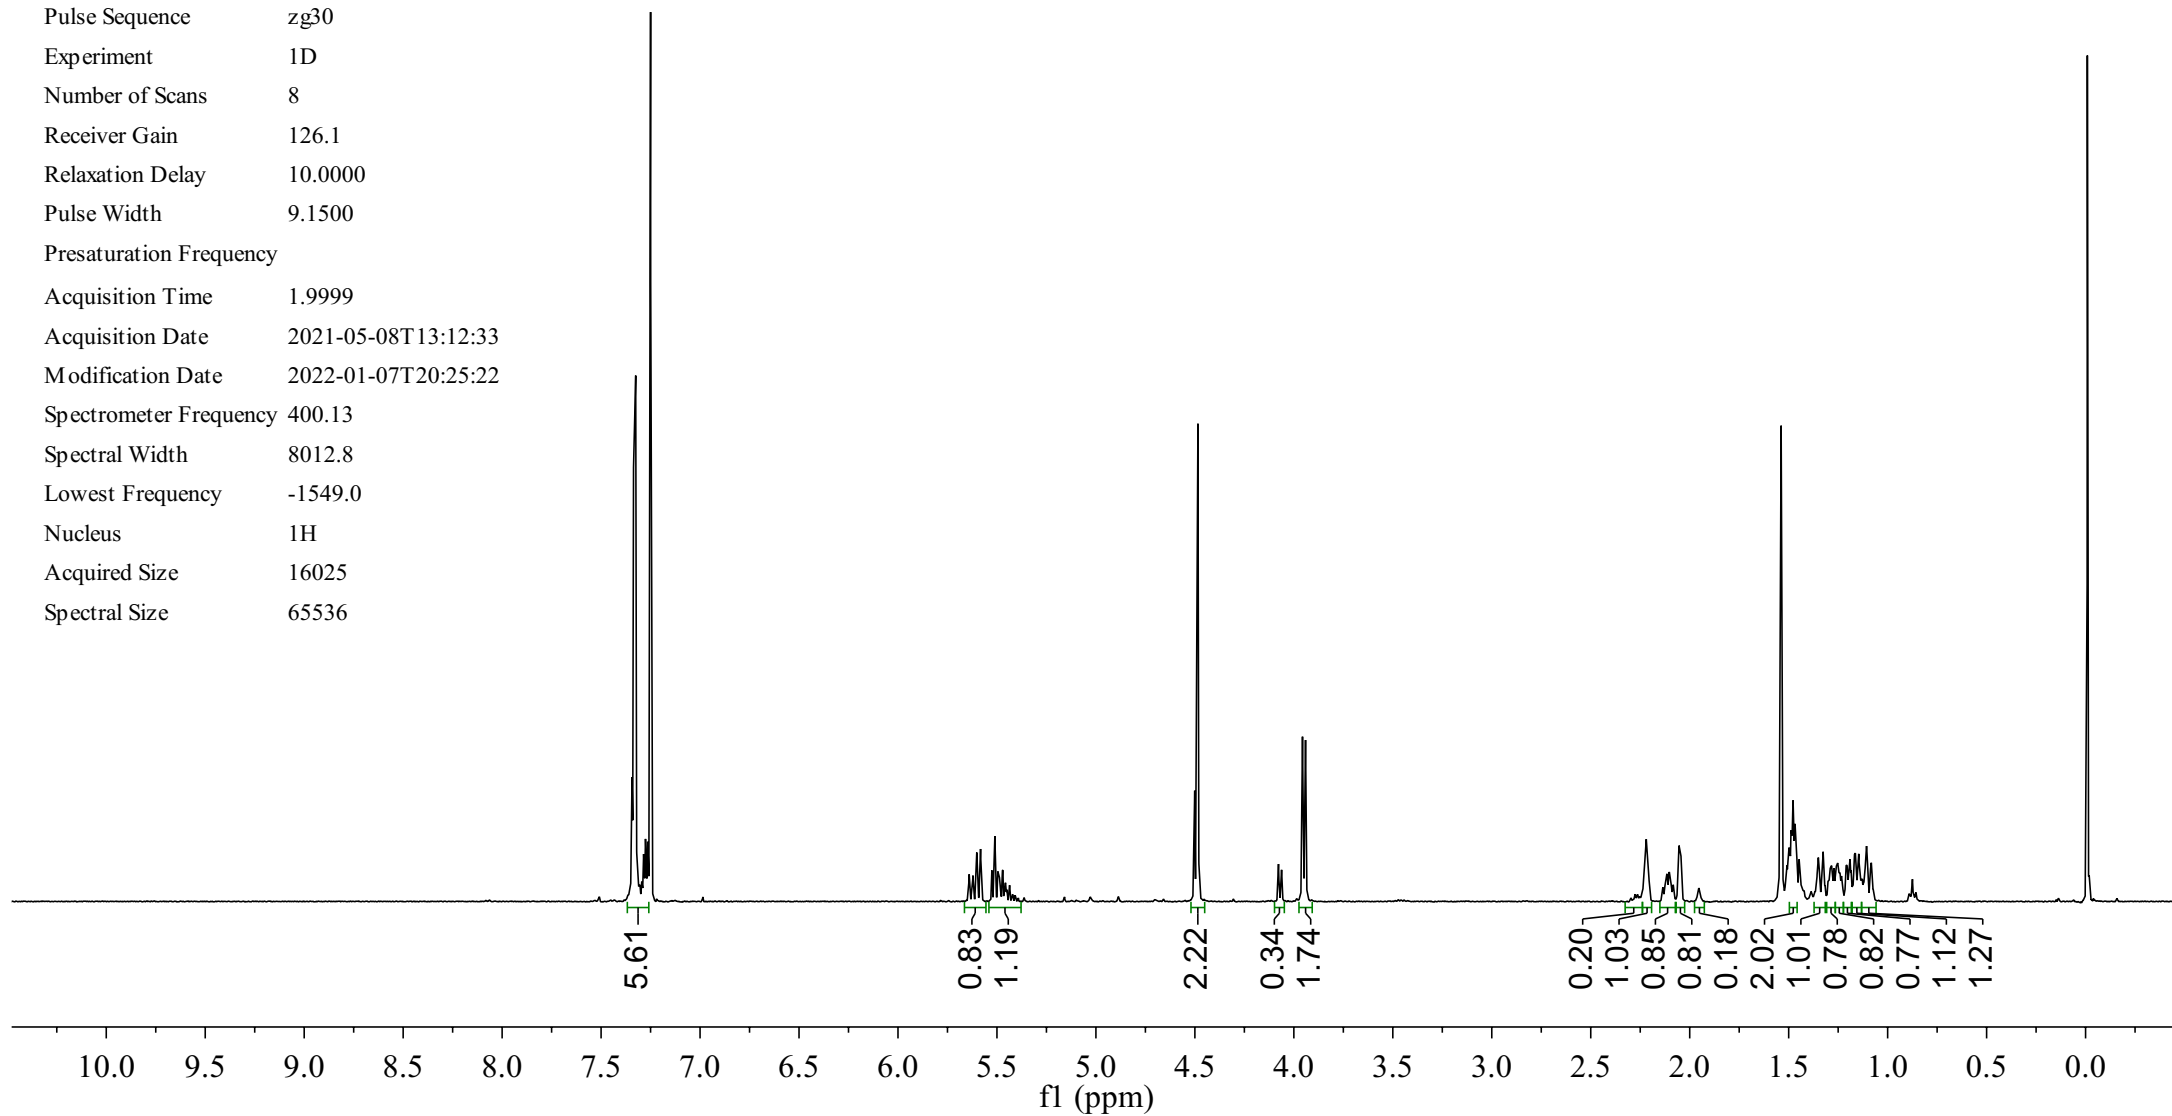

YM-20201214-1-2. 2. fid

| Parameter               | Value                 |
|-------------------------|-----------------------|
| Title                   | YM-20201214-1-2.2.fid |
| Comment                 |                       |
| Origin                  | Bruker BioSpin GmbH   |
| Owner                   | nmr                   |
| Site                    |                       |
| Instrument              | spect                 |
| Solvent                 | CDC13                 |
| Temperature             | 296.2                 |
| Pulse Sequence          | zgpg30                |
| Experiment              | 1D                    |
| Number of Scans         | 87                    |
| Receiver Gain           | 193.1                 |
| Relaxation Delay        | 2.0000                |
| Pulse Width             | 9.6000                |
| Presaturation Frequency |                       |
| Acquisition Time        | 1.1010                |
| Acquisition Date        | 2020-12-16T08:51:00   |
| Modification Date       | 2020-12-16T09:49:16   |
| Spectrometer Frequency  | 125.77                |
| Spectral Width          | 29761.9               |
| Lowest Frequency        | -2289.5               |
| Nucleus                 | 13C                   |
| Acquired Size           | 32768                 |
| Spectral Size           | 65536                 |

140.5  
138.6  
128.5  
128.0  
127.7  
123.7

72.0  
71.2

44.8  
42.5  
37.8  
36.7  
35.8  
29.8  
29.1

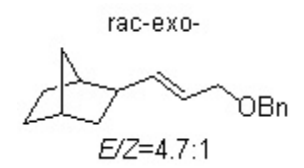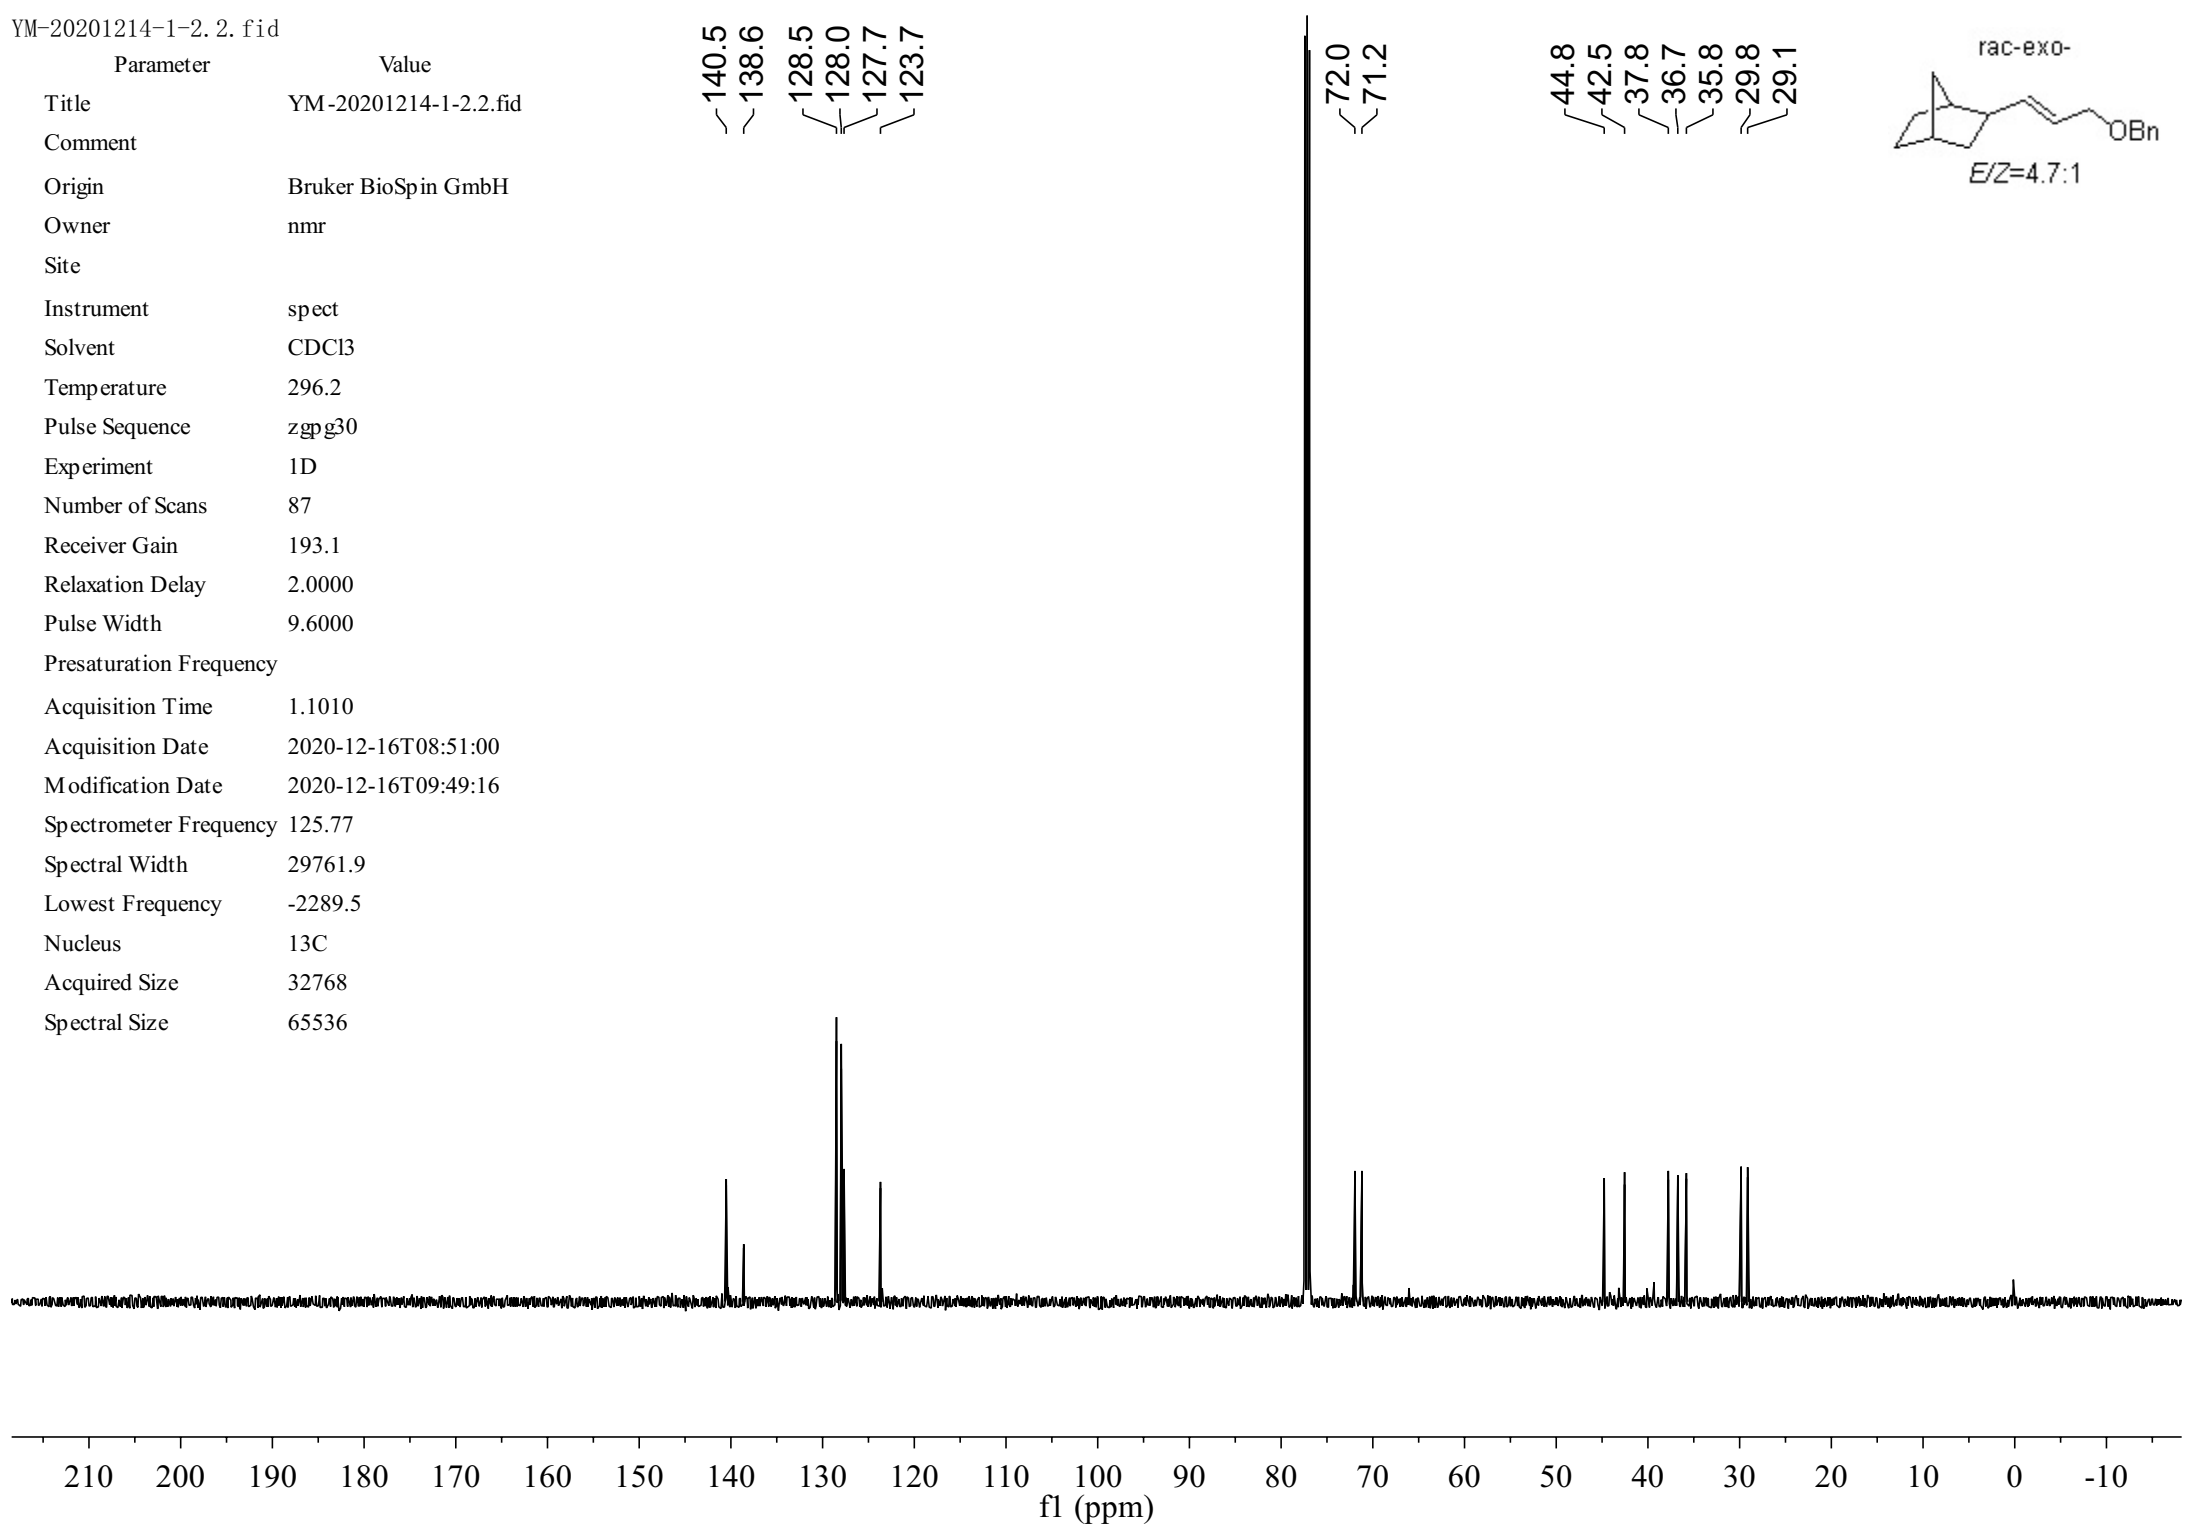

YM-20240623-2.1.fid  
29-32, T

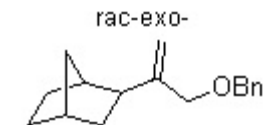

| Parameter               | Value               |
|-------------------------|---------------------|
| Title                   | YM-20240623-2.1.fid |
| Comment                 | 29-32, T            |
| Origin                  | Bruker BioSpin GmbH |
| Owner                   | nmr                 |
| Site                    |                     |
| Instrument              | spect               |
| Solvent                 | CDC13               |
| Temperature             | 296.1               |
| Pulse Sequence          | zg30                |
| Experiment              | 1D                  |
| Number of Scans         | 16                  |
| Receiver Gain           | 70.5                |
| Relaxation Delay        | 1.0000              |
| Pulse Width             | 11.3200             |
| Presaturation Frequency |                     |
| Acquisition Time        | 3.2768              |
| Acquisition Date        | 2024-06-28T00:42:10 |
| Modification Date       | 2024-06-28T05:05:16 |
| Spectrometer Frequency  | 500.13              |
| Spectral Width          | 10000.0             |
| Lowest Frequency        | -1923.5             |
| Nucleus                 | 1H                  |
| Acquired Size           | 32768               |
| Spectral Size           | 65536               |

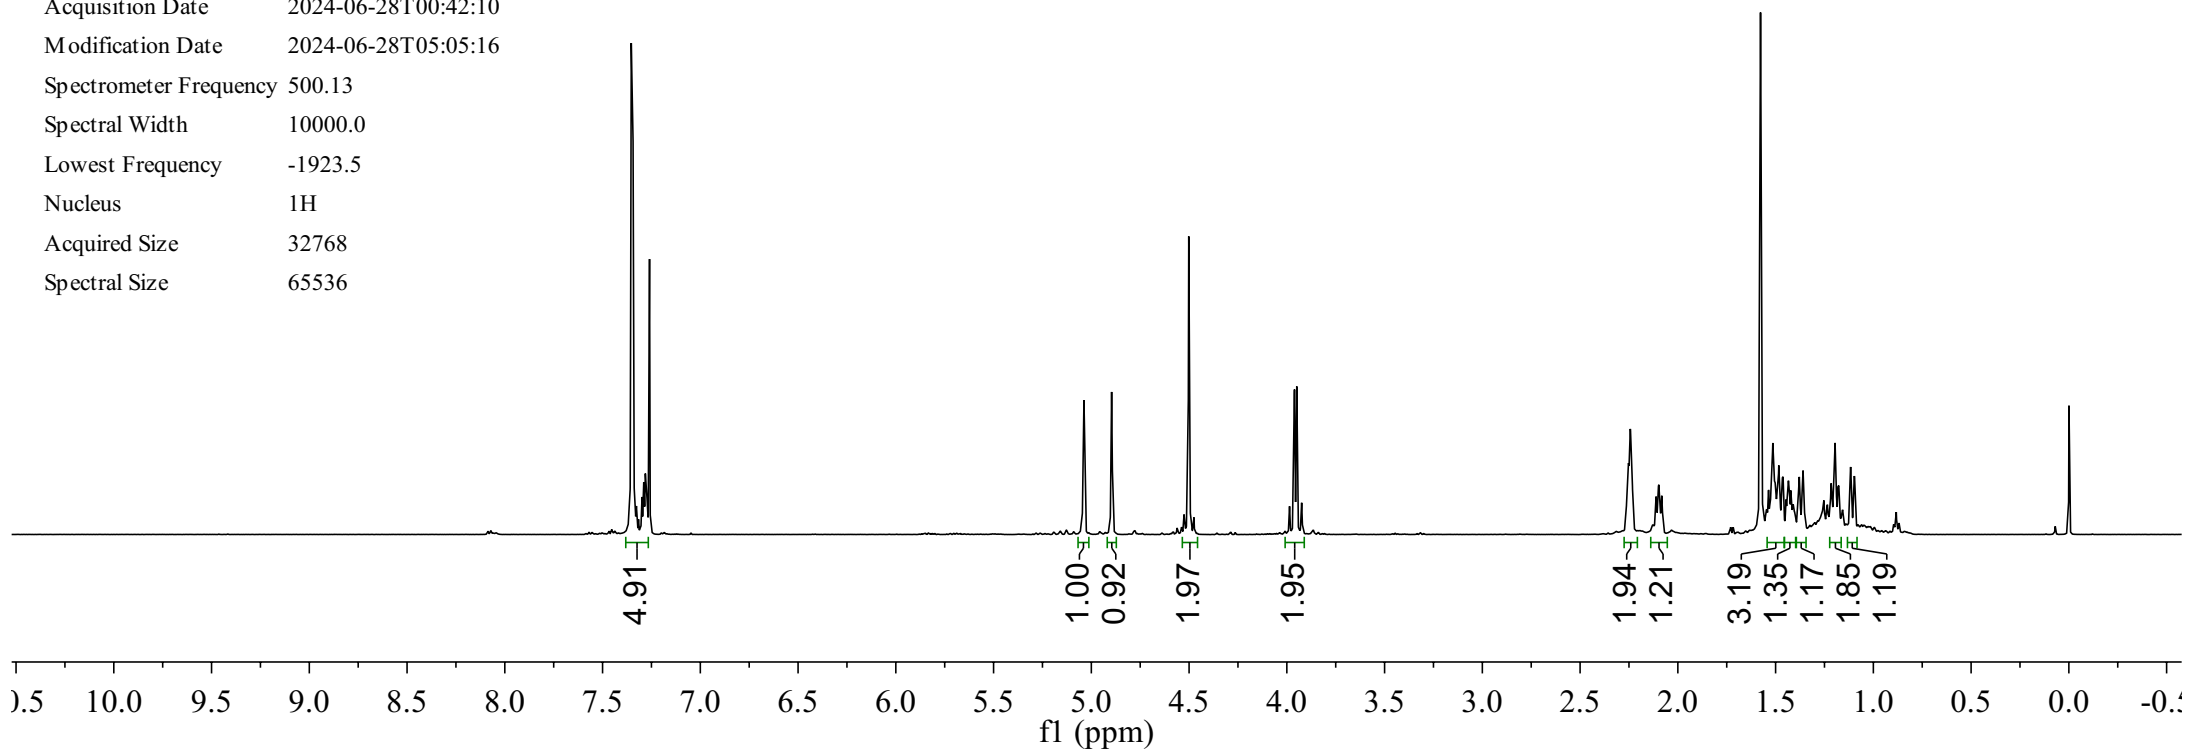

YM-20240623-2.2.fid  
29-32, T

| Parameter               | Value               |
|-------------------------|---------------------|
| Title                   | YM-20240623-2.2.fid |
| Comment                 | 29-32, T            |
| Origin                  | Bruker BioSpin GmbH |
| Owner                   | nmr                 |
| Site                    |                     |
| Instrument              | spect               |
| Solvent                 | CDC13               |
| Temperature             | 296.1               |
| Pulse Sequence          | zgpg30              |
| Experiment              | 1D                  |
| Number of Scans         | 32                  |
| Receiver Gain           | 193.1               |
| Relaxation Delay        | 2.0000              |
| Pulse Width             | 9.9400              |
| Presaturation Frequency |                     |
| Acquisition Time        | 1.1010              |
| Acquisition Date        | 2024-06-28T00:45:00 |
| Modification Date       | 2024-06-28T05:05:16 |
| Spectrometer Frequency  | 125.77              |
| Spectral Width          | 29761.9             |
| Lowest Frequency        | -2288.5             |
| Nucleus                 | 13C                 |
| Acquired Size           | 32768               |
| Spectral Size           | 65536               |

—150.2 —138.6 {128.5 {127.8 {127.6 —108.9 {73.4 {72.1 {44.2 {40.4 {36.8 {36.7 {36.1 {30.4 {29.0

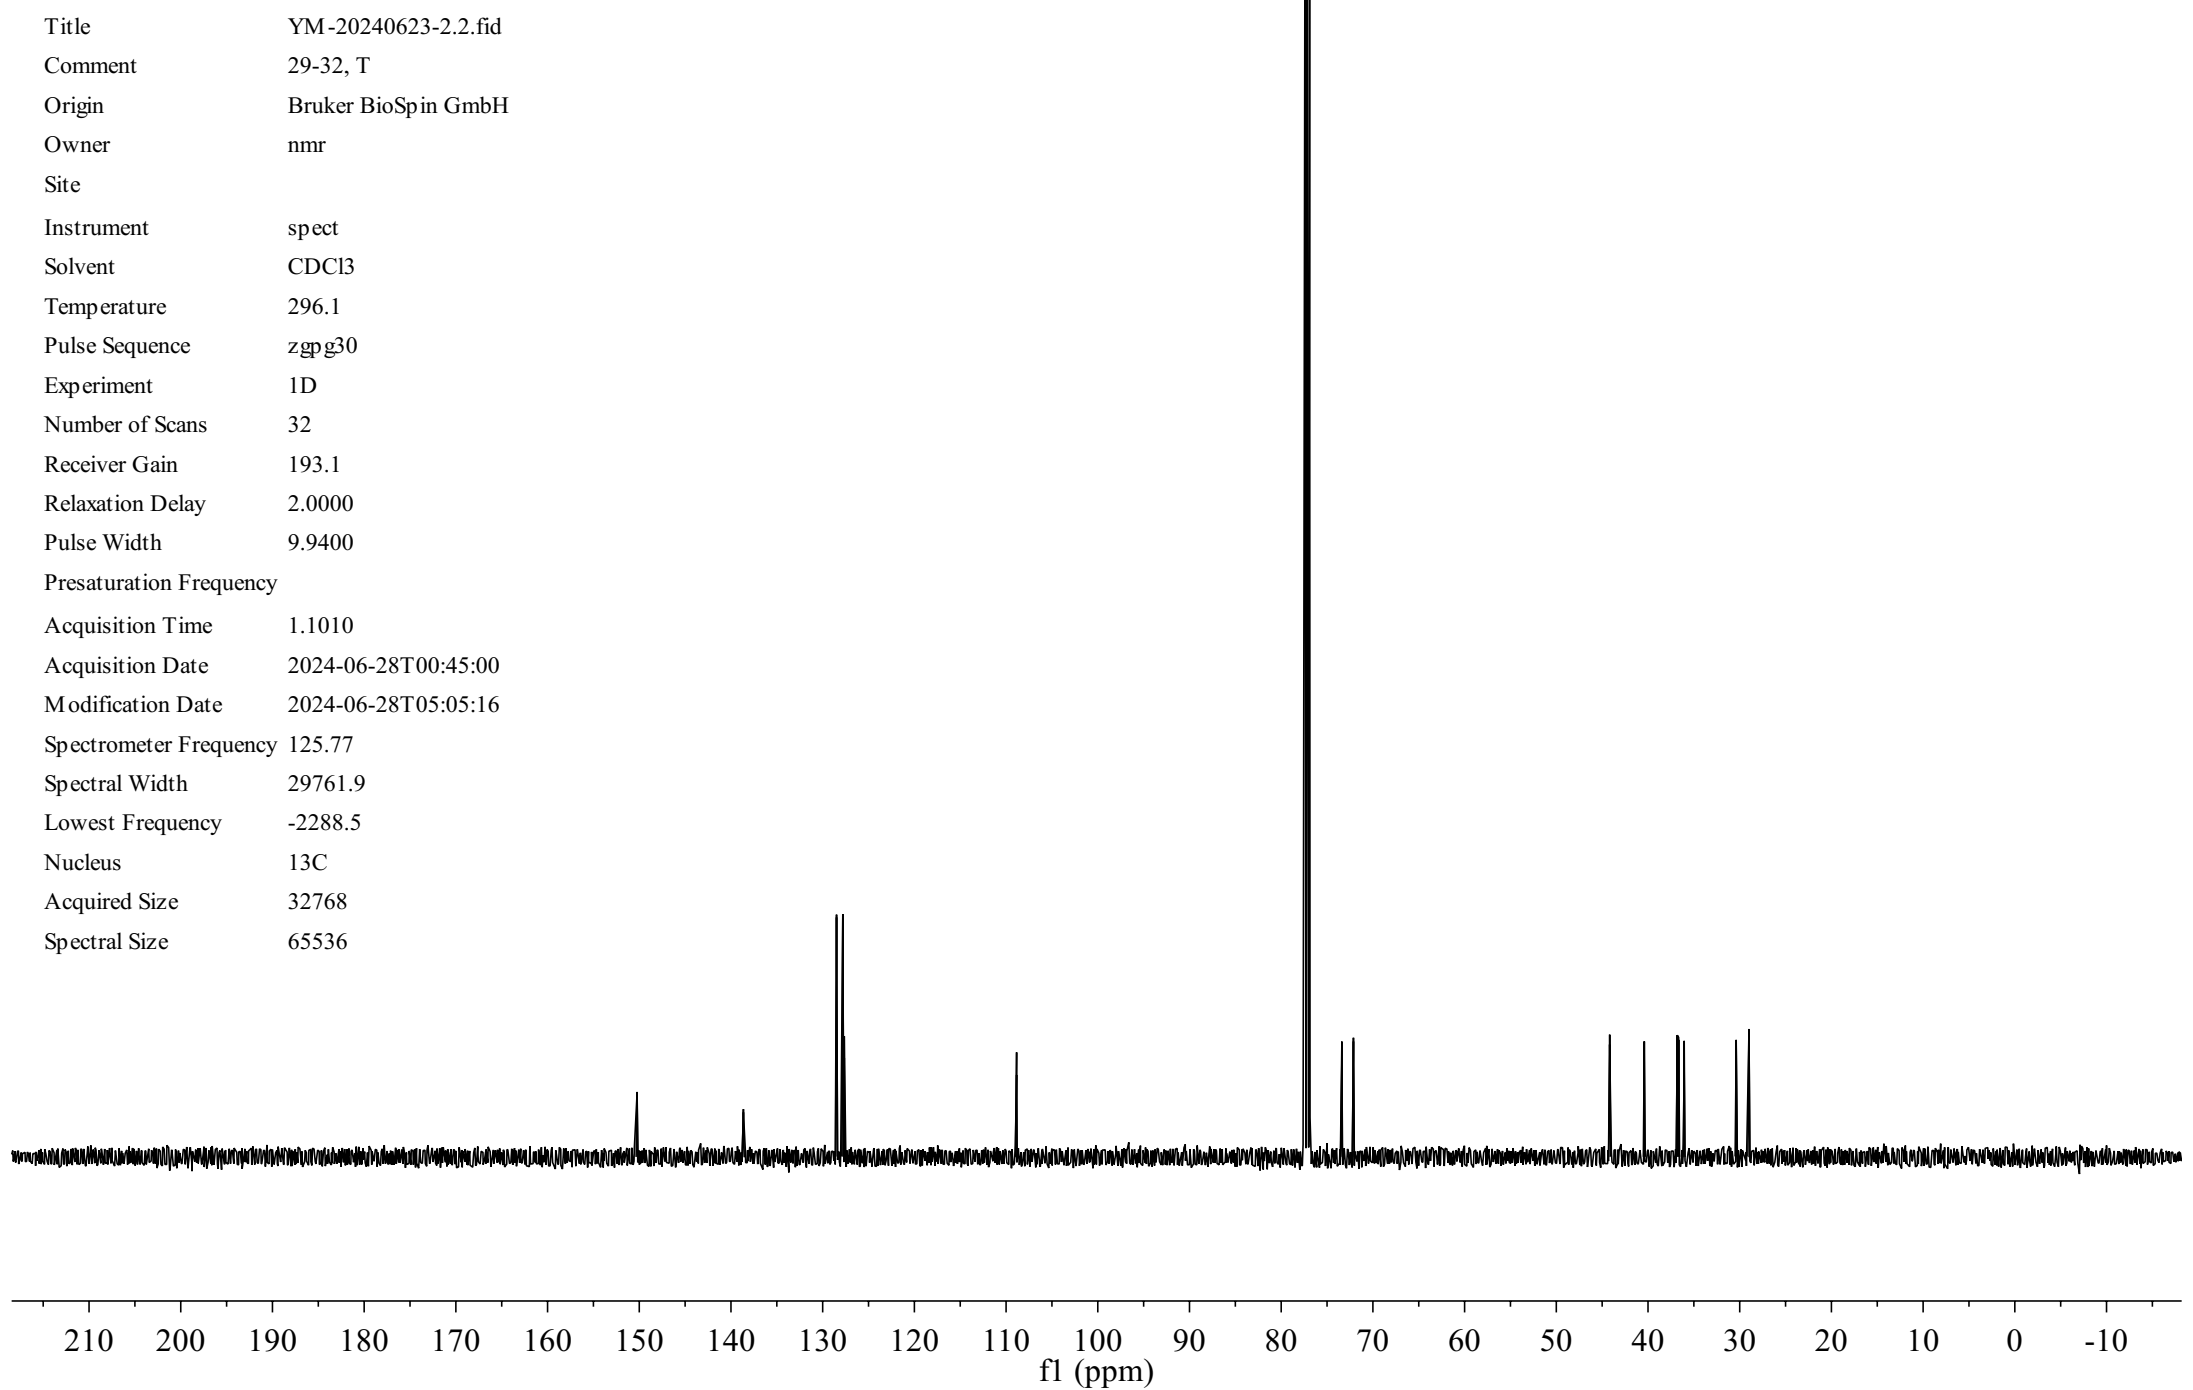

YM-20240617-1.2.fid

| S21-24 | Parameter               | Value               |
|--------|-------------------------|---------------------|
|        | Title                   | YM-20240617-1.2.fid |
|        | Comment                 | S21-24              |
|        | Origin                  | Bruker BioSpin GmbH |
|        | Owner                   | nmr                 |
|        | Site                    |                     |
|        | Instrument              | spect               |
|        | Solvent                 | CDC13               |
|        | Temperature             | 296.1               |
|        | Pulse Sequence          | zg30                |
|        | Experiment              | 1D                  |
|        | Number of Scans         | 16                  |
|        | Receiver Gain           | 54.3                |
|        | Relaxation Delay        | 1.0000              |
|        | Pulse Width             | 11.3200             |
|        | Presaturation Frequency |                     |
|        | Acquisition Time        | 3.2768              |
|        | Acquisition Date        | 2024-06-17T21:59:00 |
|        | Modification Date       | 2024-06-18T09:37:39 |
|        | Spectrometer Frequency  | 500.13              |
|        | Spectral Width          | 10000.0             |
|        | Lowest Frequency        | -1924.2             |
|        | Nucleus                 | 1H                  |
|        | Acquired Size           | 32768               |
|        | Spectral Size           | 65536               |

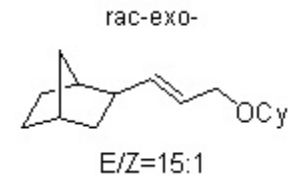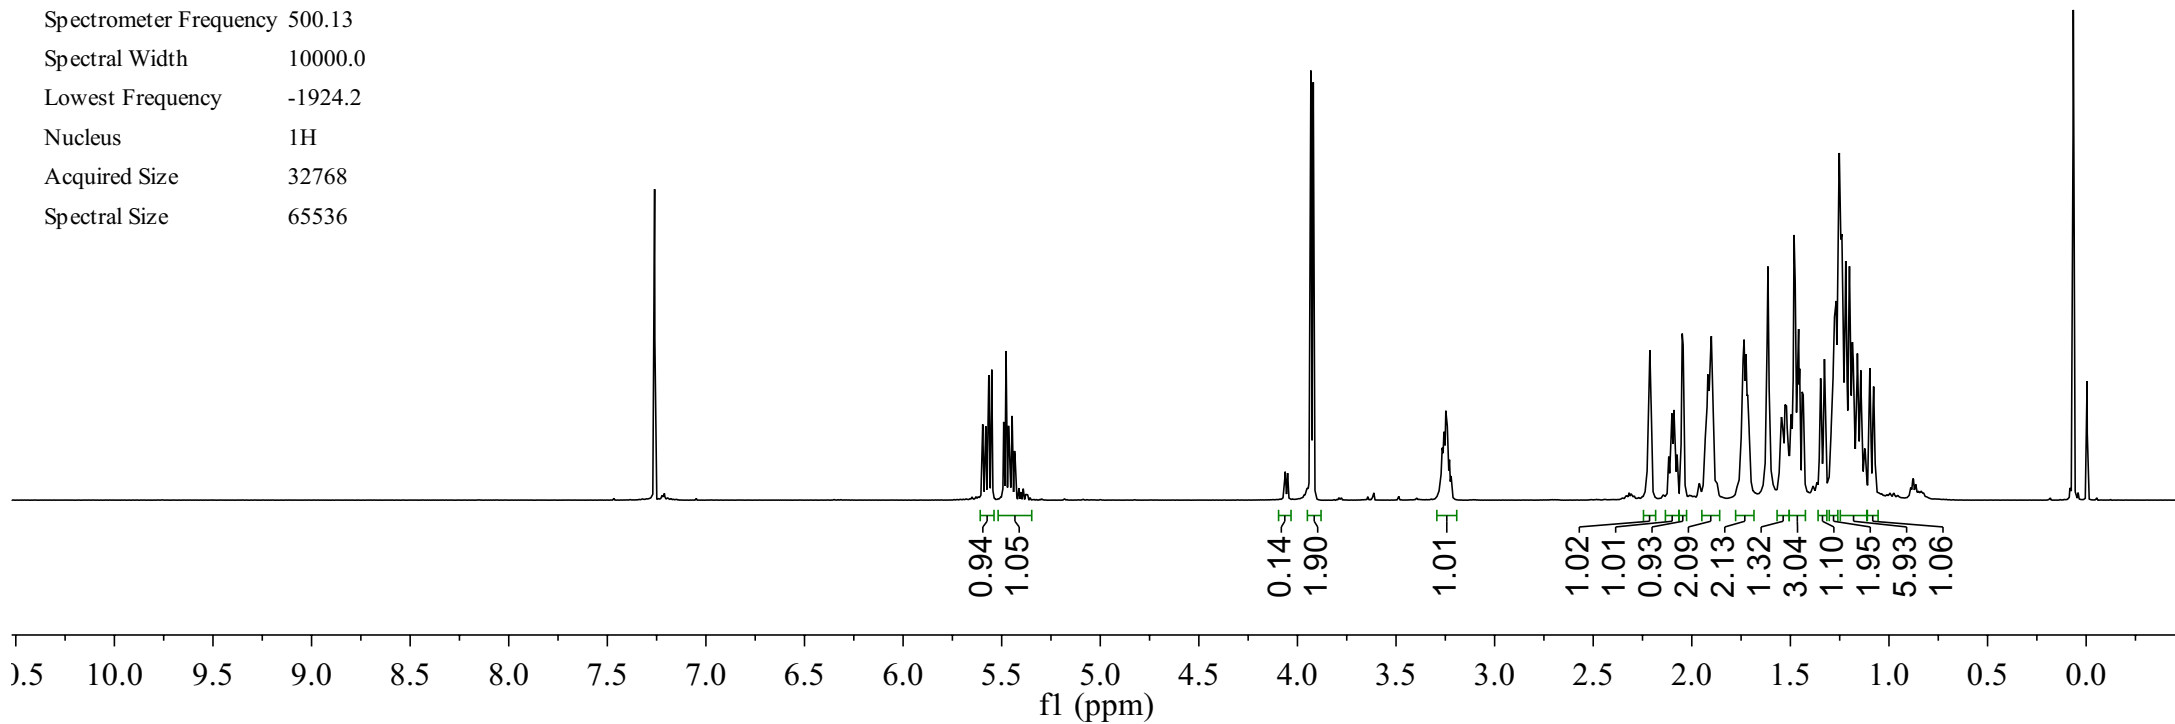

YM-20240617-1.3.fid

| Parameter               | Value               |
|-------------------------|---------------------|
| Title                   | YM-20240617-1.3.fid |
| Comment                 | S21-24              |
| Origin                  | Bruker BioSpin GmbH |
| Owner                   | nmr                 |
| Site                    |                     |
| Instrument              | spect               |
| Solvent                 | CDC13               |
| Temperature             | 296.1               |
| Pulse Sequence          | zgpg30              |
| Experiment              | 1D                  |
| Number of Scans         | 48                  |
| Receiver Gain           | 193.1               |
| Relaxation Delay        | 2.0000              |
| Pulse Width             | 9.9400              |
| Presaturation Frequency |                     |
| Acquisition Time        | 1.1010              |
| Acquisition Date        | 2024-06-17T22:01:00 |
| Modification Date       | 2024-06-18T09:37:39 |
| Spectrometer Frequency  | 125.77              |
| Spectral Width          | 29761.9             |
| Lowest Frequency        | -2290.8             |
| Nucleus                 | 13C                 |
| Acquired Size           | 32768               |
| Spectral Size           | 65536               |

—139.4

—124.6

—68.8

44.7  
42.5  
37.8  
36.7  
35.8  
32.5  
29.8  
29.1  
26.0  
24.4

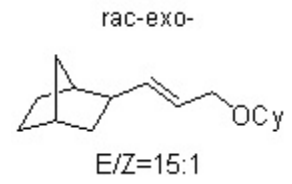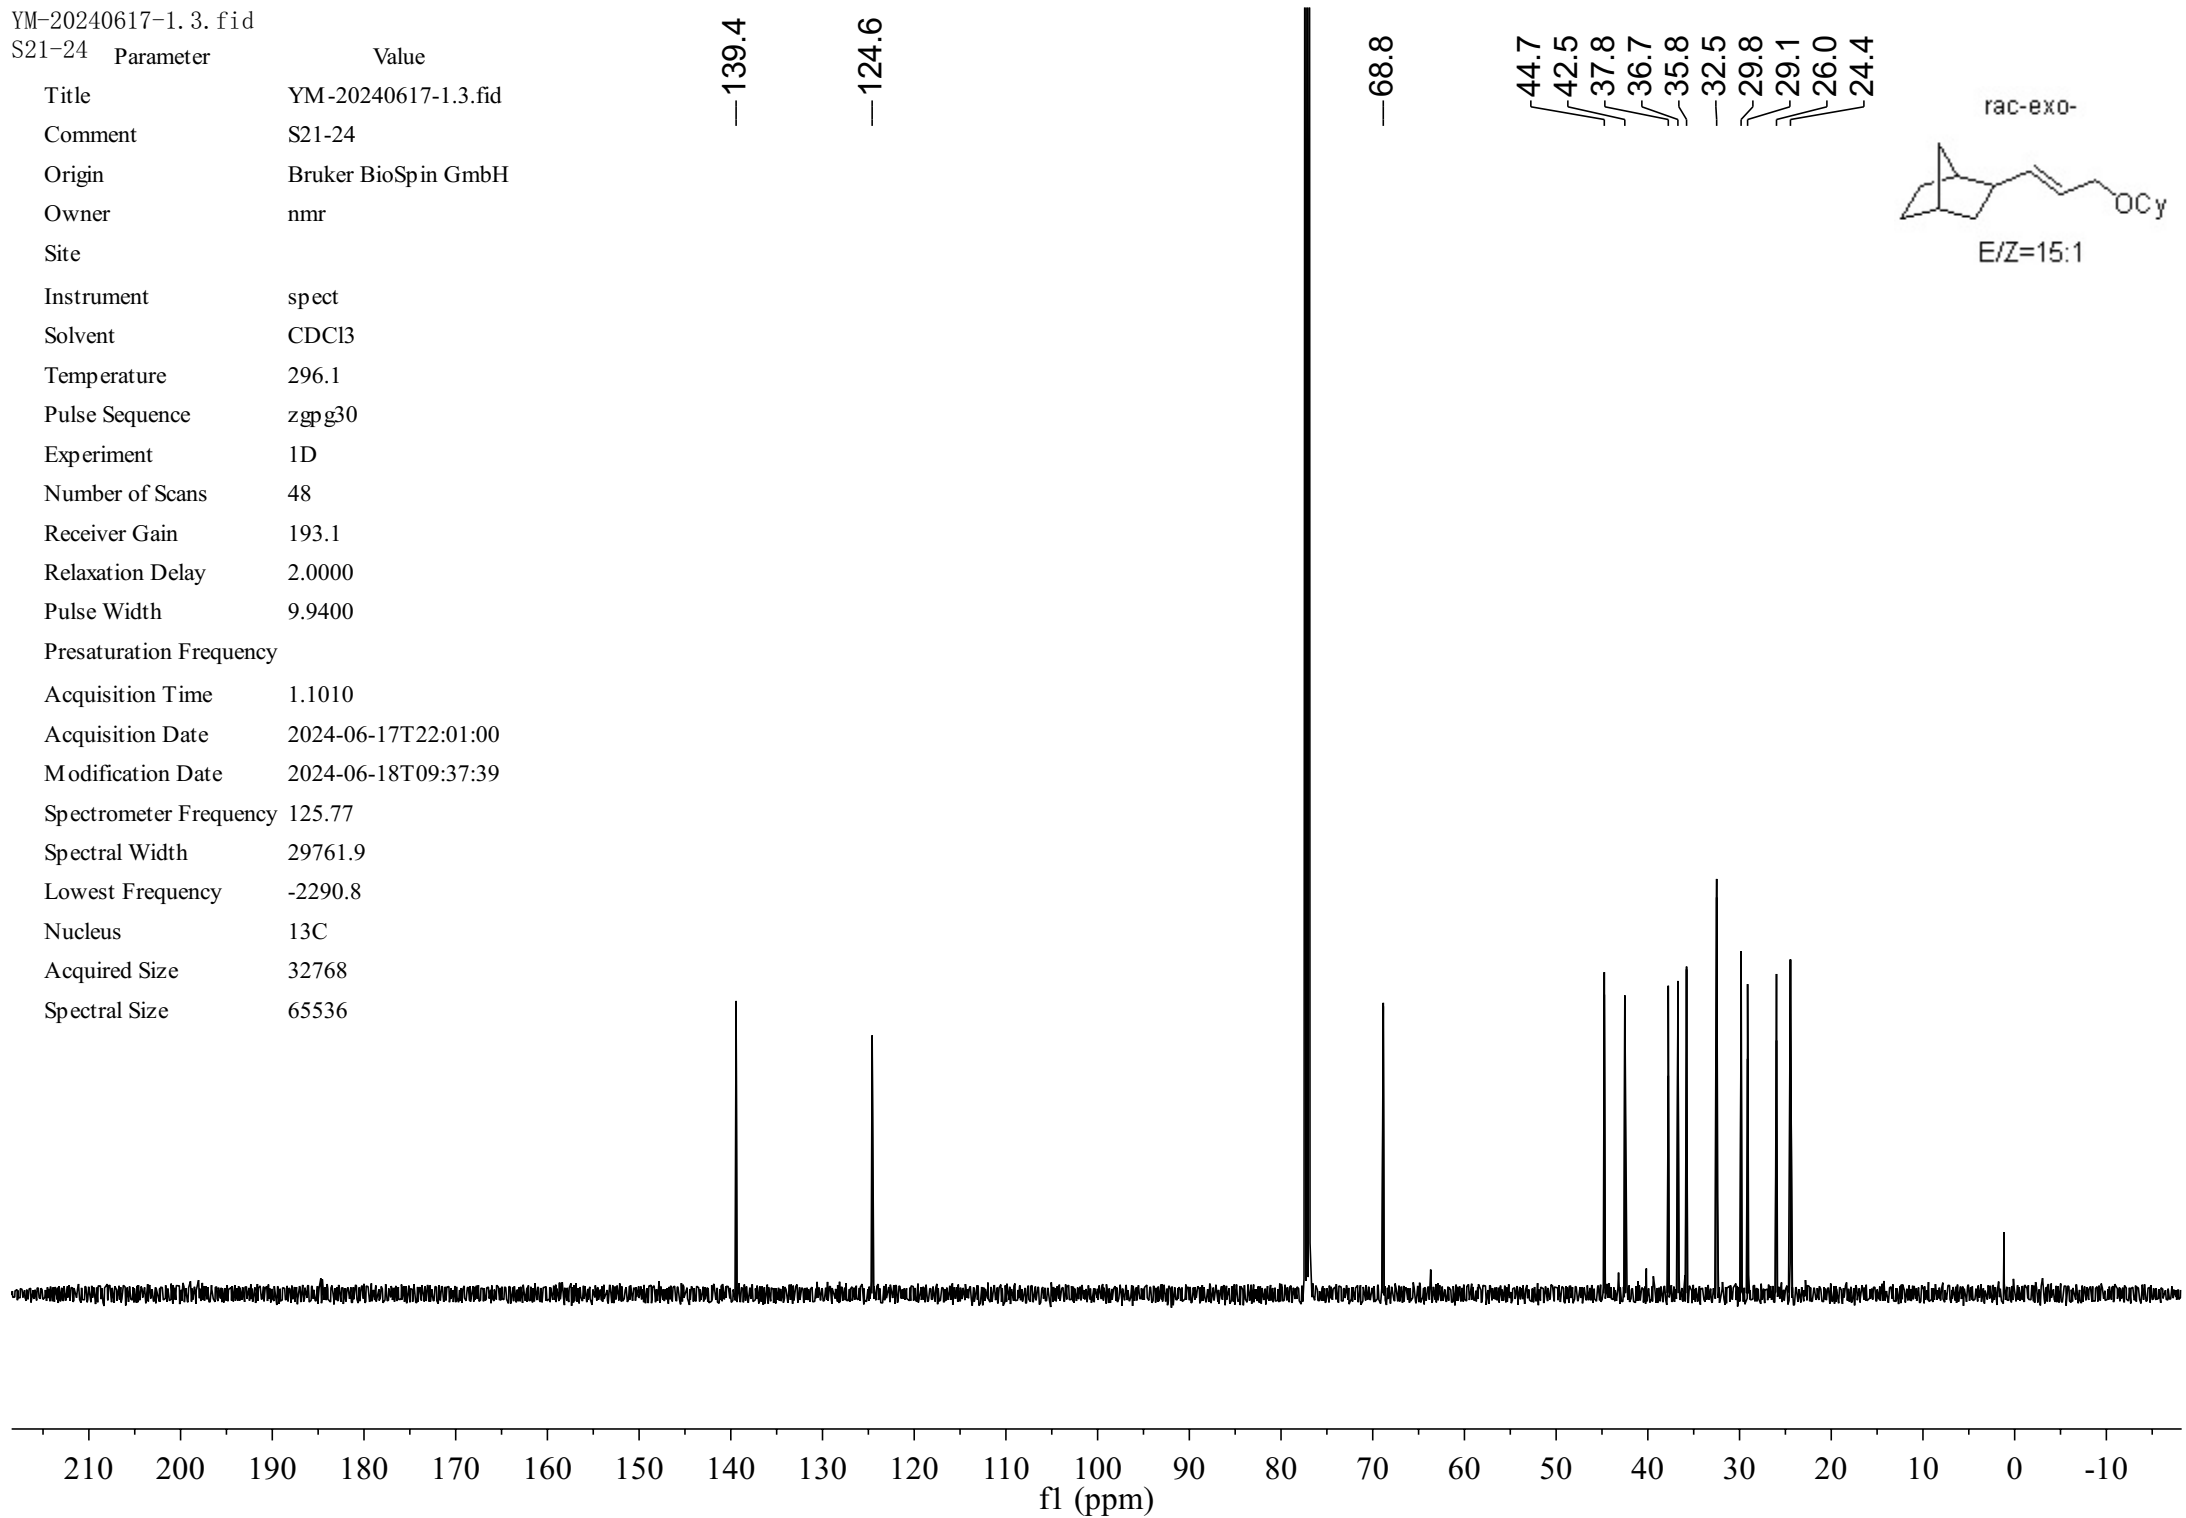



YM-20240511-1.1.fid

| Parameter               | Value               |
|-------------------------|---------------------|
| Title                   | YM-20240511-1.1.fid |
| Comment                 | s22-25              |
| Origin                  | Bruker BioSpin GmbH |
| Owner                   | nmr                 |
| Site                    |                     |
| Instrument              | spect               |
| Solvent                 | CDC13               |
| Temperature             | 296.1               |
| Pulse Sequence          | zg30                |
| Experiment              | 1D                  |
| Number of Scans         | 8                   |
| Receiver Gain           | 31.1                |
| Relaxation Delay        | 1.0000              |
| Pulse Width             | 11.3200             |
| Presaturation Frequency |                     |
| Acquisition Time        | 3.2768              |
| Acquisition Date        | 2024-05-13T13:44:03 |
| Modification Date       | 2024-05-13T14:38:10 |
| Spectrometer Frequency  | 500.13              |
| Spectral Width          | 10000.0             |
| Lowest Frequency        | -1924.0             |
| Nucleus                 | 1H                  |
| Acquired Size           | 32768               |
| Spectral Size           | 65536               |

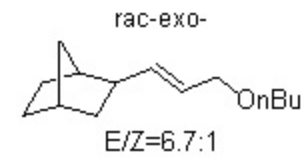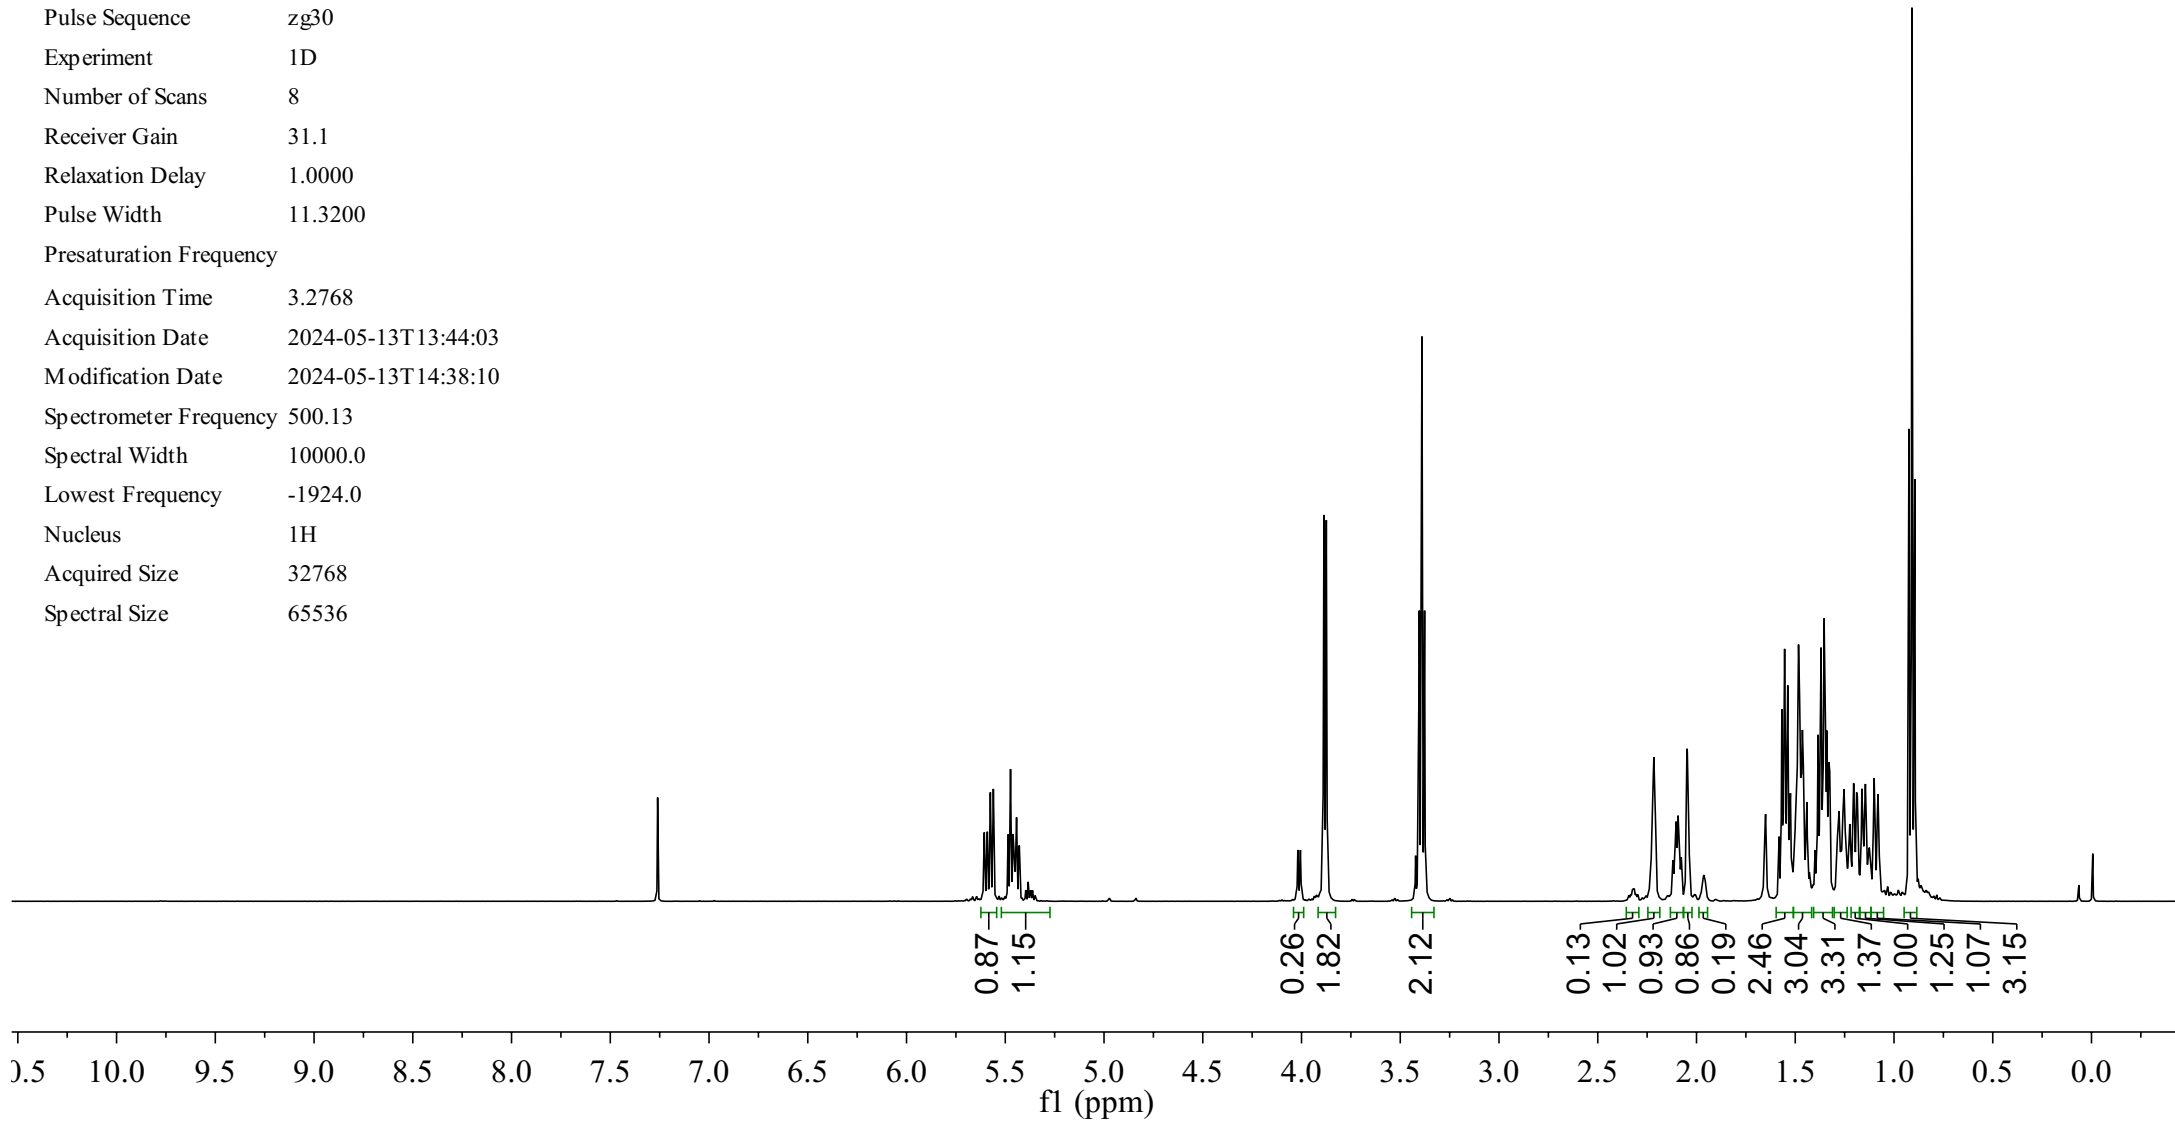

YM-20240511-1.2.fid

| Parameter               | Value               |
|-------------------------|---------------------|
| Title                   | YM-20240511-1.2.fid |
| Comment                 | s22-25              |
| Origin                  | Bruker BioSpin GmbH |
| Owner                   | nmr                 |
| Site                    |                     |
| Instrument              | spect               |
| Solvent                 | CDC13               |
| Temperature             | 296.2               |
| Pulse Sequence          | zgpg30              |
| Experiment              | 1D                  |
| Number of Scans         | 24                  |
| Receiver Gain           | 193.1               |
| Relaxation Delay        | 2.0000              |
| Pulse Width             | 9.9400              |
| Presaturation Frequency |                     |
| Acquisition Time        | 1.0486              |
| Acquisition Date        | 2024-05-13T13:46:39 |
| Modification Date       | 2024-05-13T14:38:10 |
| Spectrometer Frequency  | 125.77              |
| Spectral Width          | 31250.0             |
| Lowest Frequency        | -1775.6             |
| Nucleus                 | 13C                 |
| Acquired Size           | 32768               |
| Spectral Size           | 65536               |

—139.9

—124.0

~71.8  
~70.0

44.7  
42.5  
37.8  
36.7  
35.8  
32.0  
29.8  
29.1  
19.5  
14.1

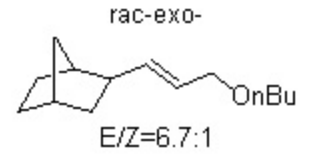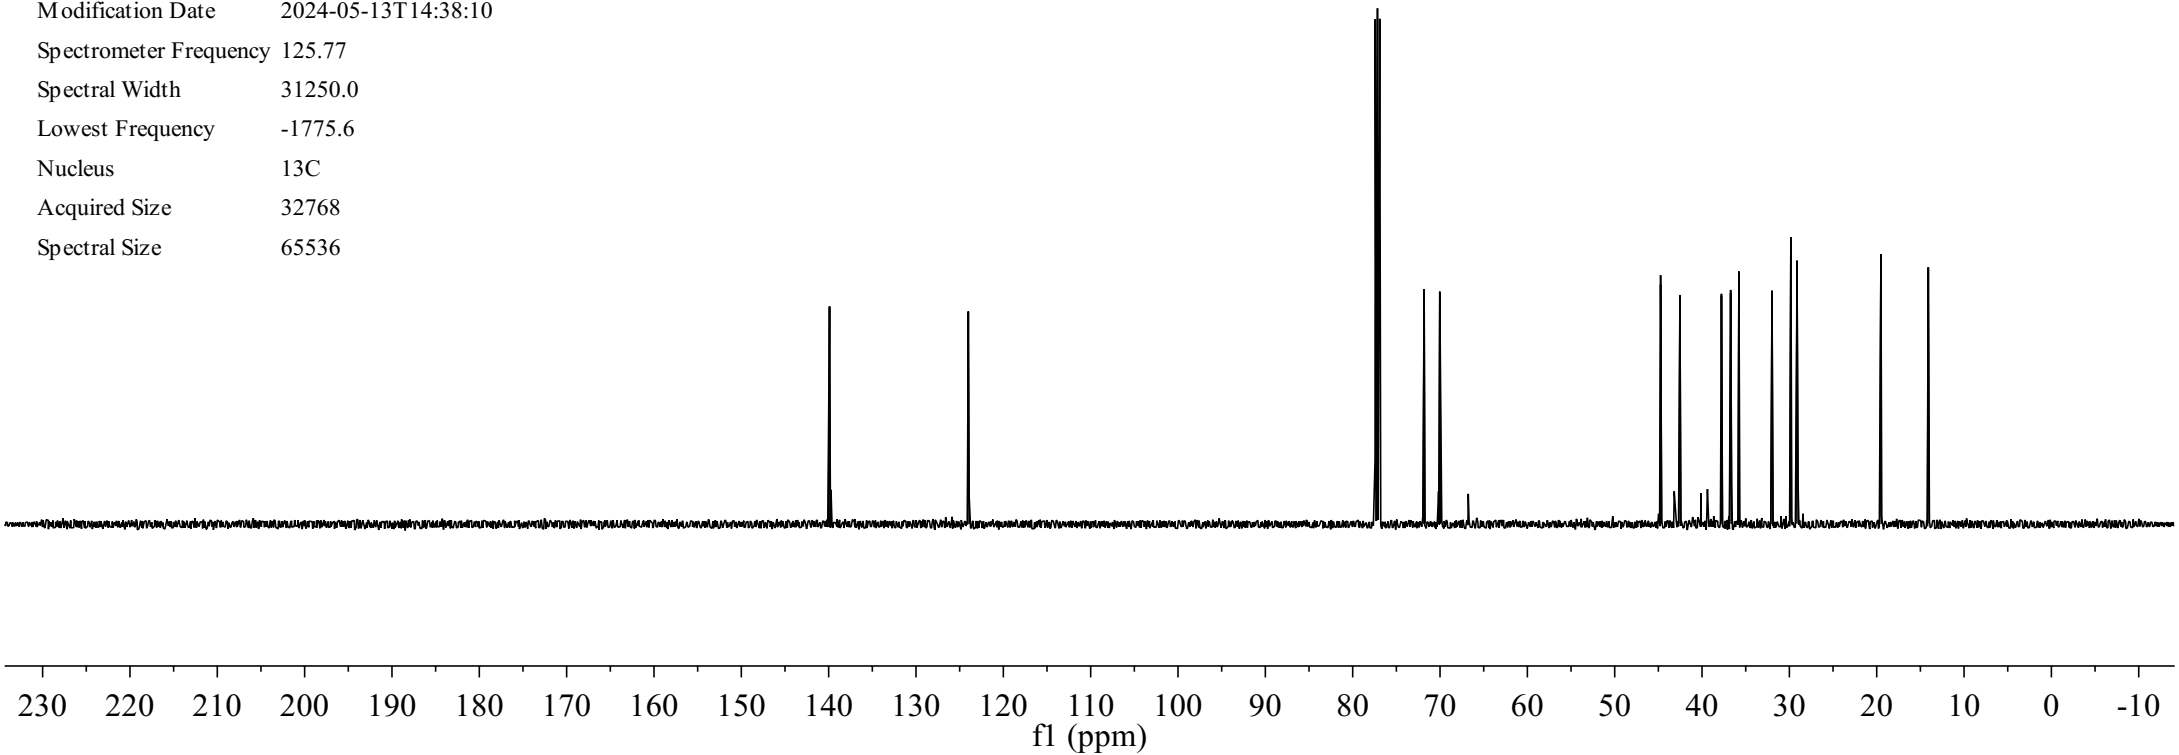

YM-20240614-1-iso.2.fid

| Parameter               | Value                   |
|-------------------------|-------------------------|
| Title                   | YM-20240614-1-iso.2.fid |
| Comment                 | S23-28                  |
| Origin                  | Bruker BioSpin GmbH     |
| Owner                   | nmrsu                   |
| Site                    |                         |
| Instrument              | Avance NEO 400          |
| Solvent                 | CDC13                   |
| Temperature             | 299.2                   |
| Pulse Sequence          | zg30                    |
| Experiment              | 1D                      |
| Number of Scans         | 8                       |
| Receiver Gain           | 101.0                   |
| Relaxation Delay        | 1.0000                  |
| Pulse Width             | 8.0000                  |
| Presaturation Frequency |                         |
| Acquisition Time        | 3.9977                  |
| Acquisition Date        | 2024-06-18T11:07:56     |
| Modification Date       | 2024-06-18T15:29:10     |
| Spectrometer Frequency  | 400.19                  |
| Spectral Width          | 8196.7                  |
| Lowest Frequency        | -1637.2                 |
| Nucleus                 | 1H                      |
| Acquired Size           | 32768                   |
| Spectral Size           | 65536                   |

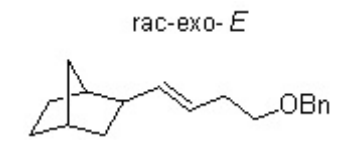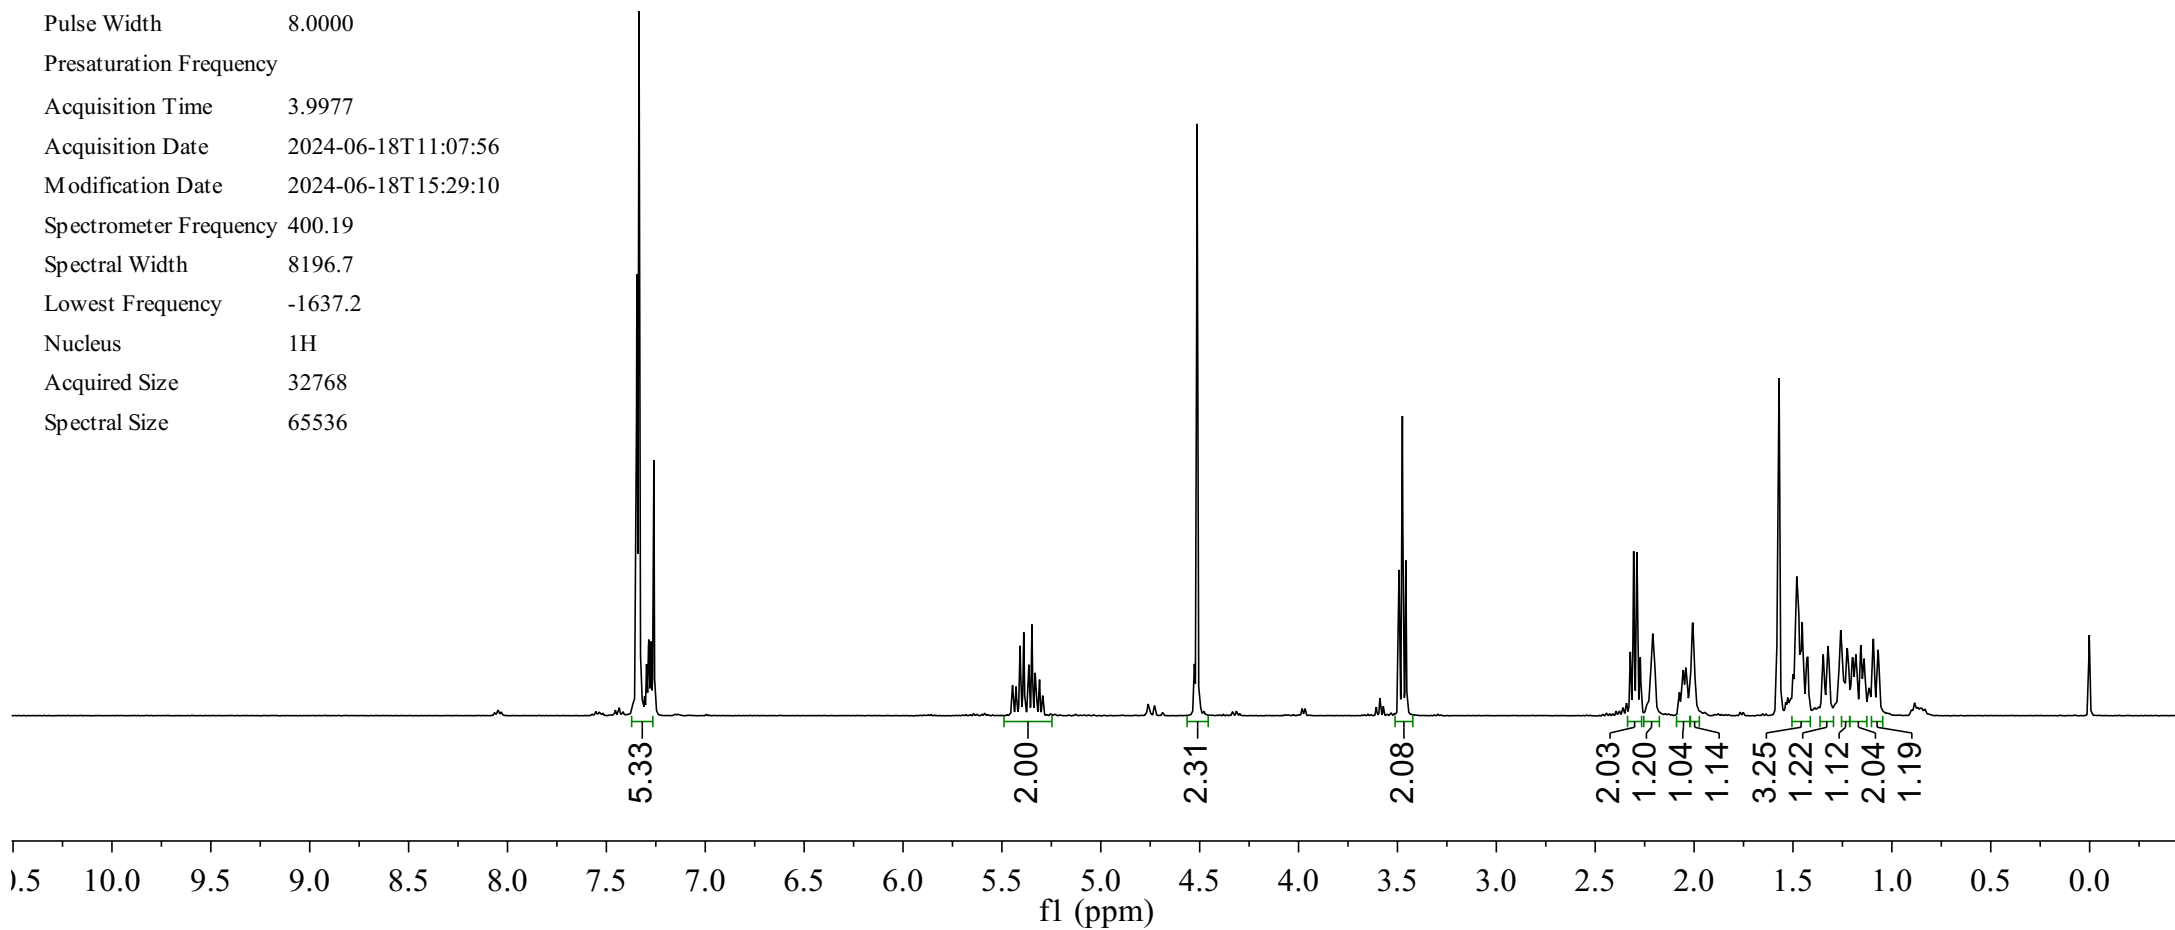

YM-20240614-1-iso. 3. fid

S23-28

| Parameter               | Value                   |
|-------------------------|-------------------------|
| Title                   | YM-20240614-1-iso.3.fid |
| Comment                 | S23-28                  |
| Origin                  | Bruker BioSpin GmbH     |
| Owner                   | nmrsu                   |
| Site                    |                         |
| Instrument              | Avance NEO 400          |
| Solvent                 | CDC13                   |
| Temperature             | 299.4                   |
| Pulse Sequence          | zgpg30                  |
| Experiment              | 1D                      |
| Number of Scans         | 64                      |
| Receiver Gain           | 101.0                   |
| Relaxation Delay        | 2.0000                  |
| Pulse Width             | 8.0000                  |
| Presaturation Frequency |                         |
| Acquisition Time        | 1.3763                  |
| Acquisition Date        | 2024-06-18T11:14:40     |
| Modification Date       | 2024-06-18T15:29:11     |
| Spectrometer Frequency  | 100.64                  |
| Spectral Width          | 23809.5                 |
| Lowest Frequency        | -1827.7                 |
| Nucleus                 | <sup>13</sup> C         |
| Acquired Size           | 32768                   |
| Spectral Size           | 65536                   |

138.7  
138.4  
128.5  
127.8  
127.6  
123.7

73.0  
70.5

45.1  
42.8  
38.0  
36.8  
35.8  
33.2  
29.9  
29.2

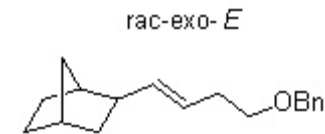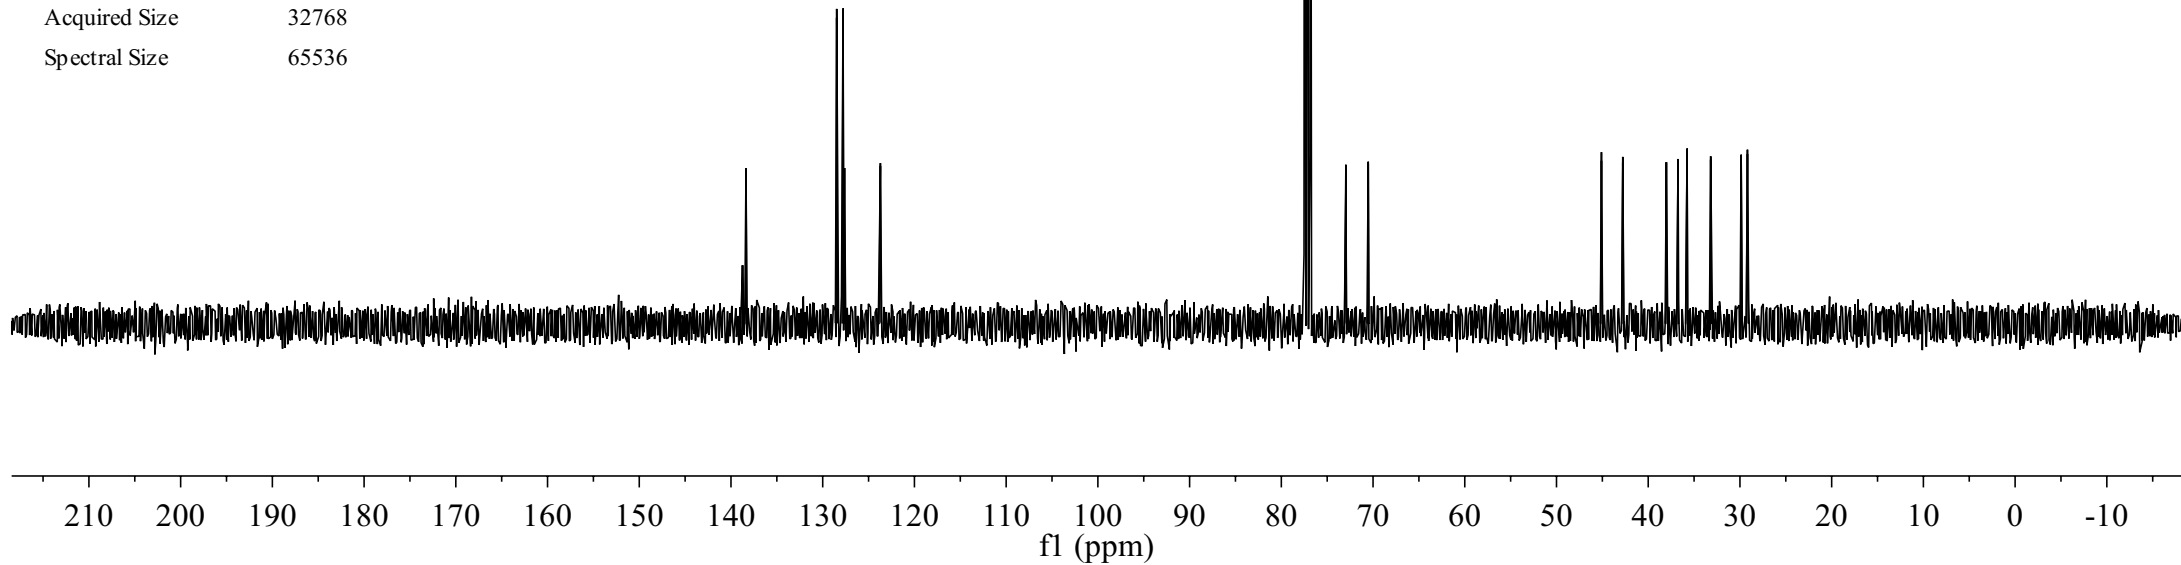

| s11 | Parameter               | Value                   |
|-----|-------------------------|-------------------------|
|     | Title                   | YM-20240619-9-iso.2.fid |
|     | Comment                 | s11                     |
|     | Origin                  | Bruker BioSpin GmbH     |
|     | Owner                   | PC                      |
|     | Site                    |                         |
|     | Instrument              | spect                   |
|     | Solvent                 | CDC13                   |
|     | Temperature             | 296.4                   |
|     | Pulse Sequence          | zg30                    |
|     | Experiment              | 1D                      |
|     | Number of Scans         | 8                       |
|     | Receiver Gain           | 62.3                    |
|     | Relaxation Delay        | 1.0000                  |
|     | Pulse Width             | 9.2600                  |
|     | Presaturation Frequency |                         |
|     | Acquisition Time        | 1.9999                  |
|     | Acquisition Date        | 2024-06-21T22:40:49     |
|     | Modification Date       | 2024-06-22T13:29:55     |
|     | Spectrometer Frequency  | 400.13                  |
|     | Spectral Width          | 8012.8                  |
|     | Lowest Frequency        | -1535.2                 |
|     | Nucleus                 | 1H                      |
|     | Acquired Size           | 16025                   |
|     | Spectral Size           | 65536                   |

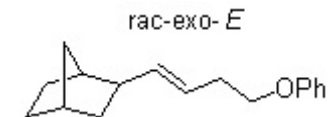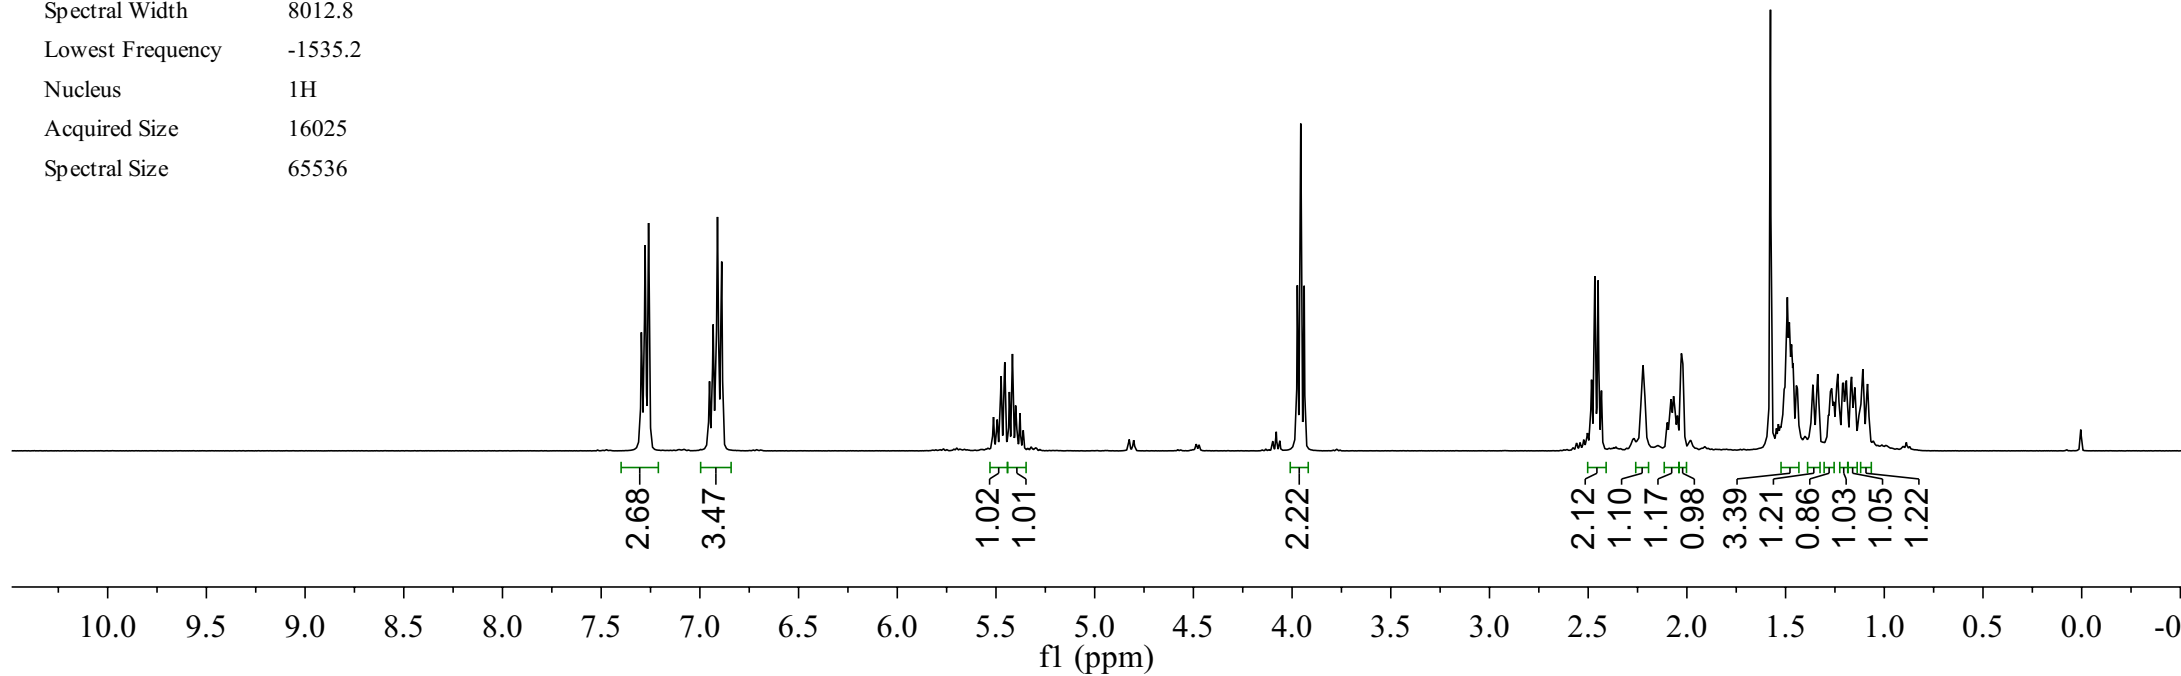

s11

| Parameter               | Value                   |
|-------------------------|-------------------------|
| Title                   | YM-20240619-9-iso.4.fid |
| Comment                 | s11                     |
| Origin                  | Bruker BioSpin GmbH     |
| Owner                   | PC                      |
| Site                    |                         |
| Instrument              | spect                   |
| Solvent                 | CDC13                   |
| Temperature             | 297.0                   |
| Pulse Sequence          | zgp30                   |
| Experiment              | 1D                      |
| Number of Scans         | 128                     |
| Receiver Gain           | 196.4                   |
| Relaxation Delay        | 2.0000                  |
| Pulse Width             | 10.2200                 |
| Presaturation Frequency |                         |
| Acquisition Time        | 1.3631                  |
| Acquisition Date        | 2024-06-23T03:43:51     |
| Modification Date       | 2024-06-23T12:52:30     |
| Spectrometer Frequency  | 100.62                  |
| Spectral Width          | 24038.5                 |
| Lowest Frequency        | -1944.6                 |
| Nucleus                 | 13C                     |
| Acquired Size           | 32768                   |
| Spectral Size           | 65536                   |

—159.1 —139.0 ~129.5 ~122.9 ~120.7 ~114.7 —67.9 45.1 42.8 38.0 36.8 35.8 32.7 29.9 29.2

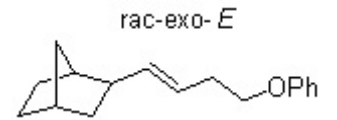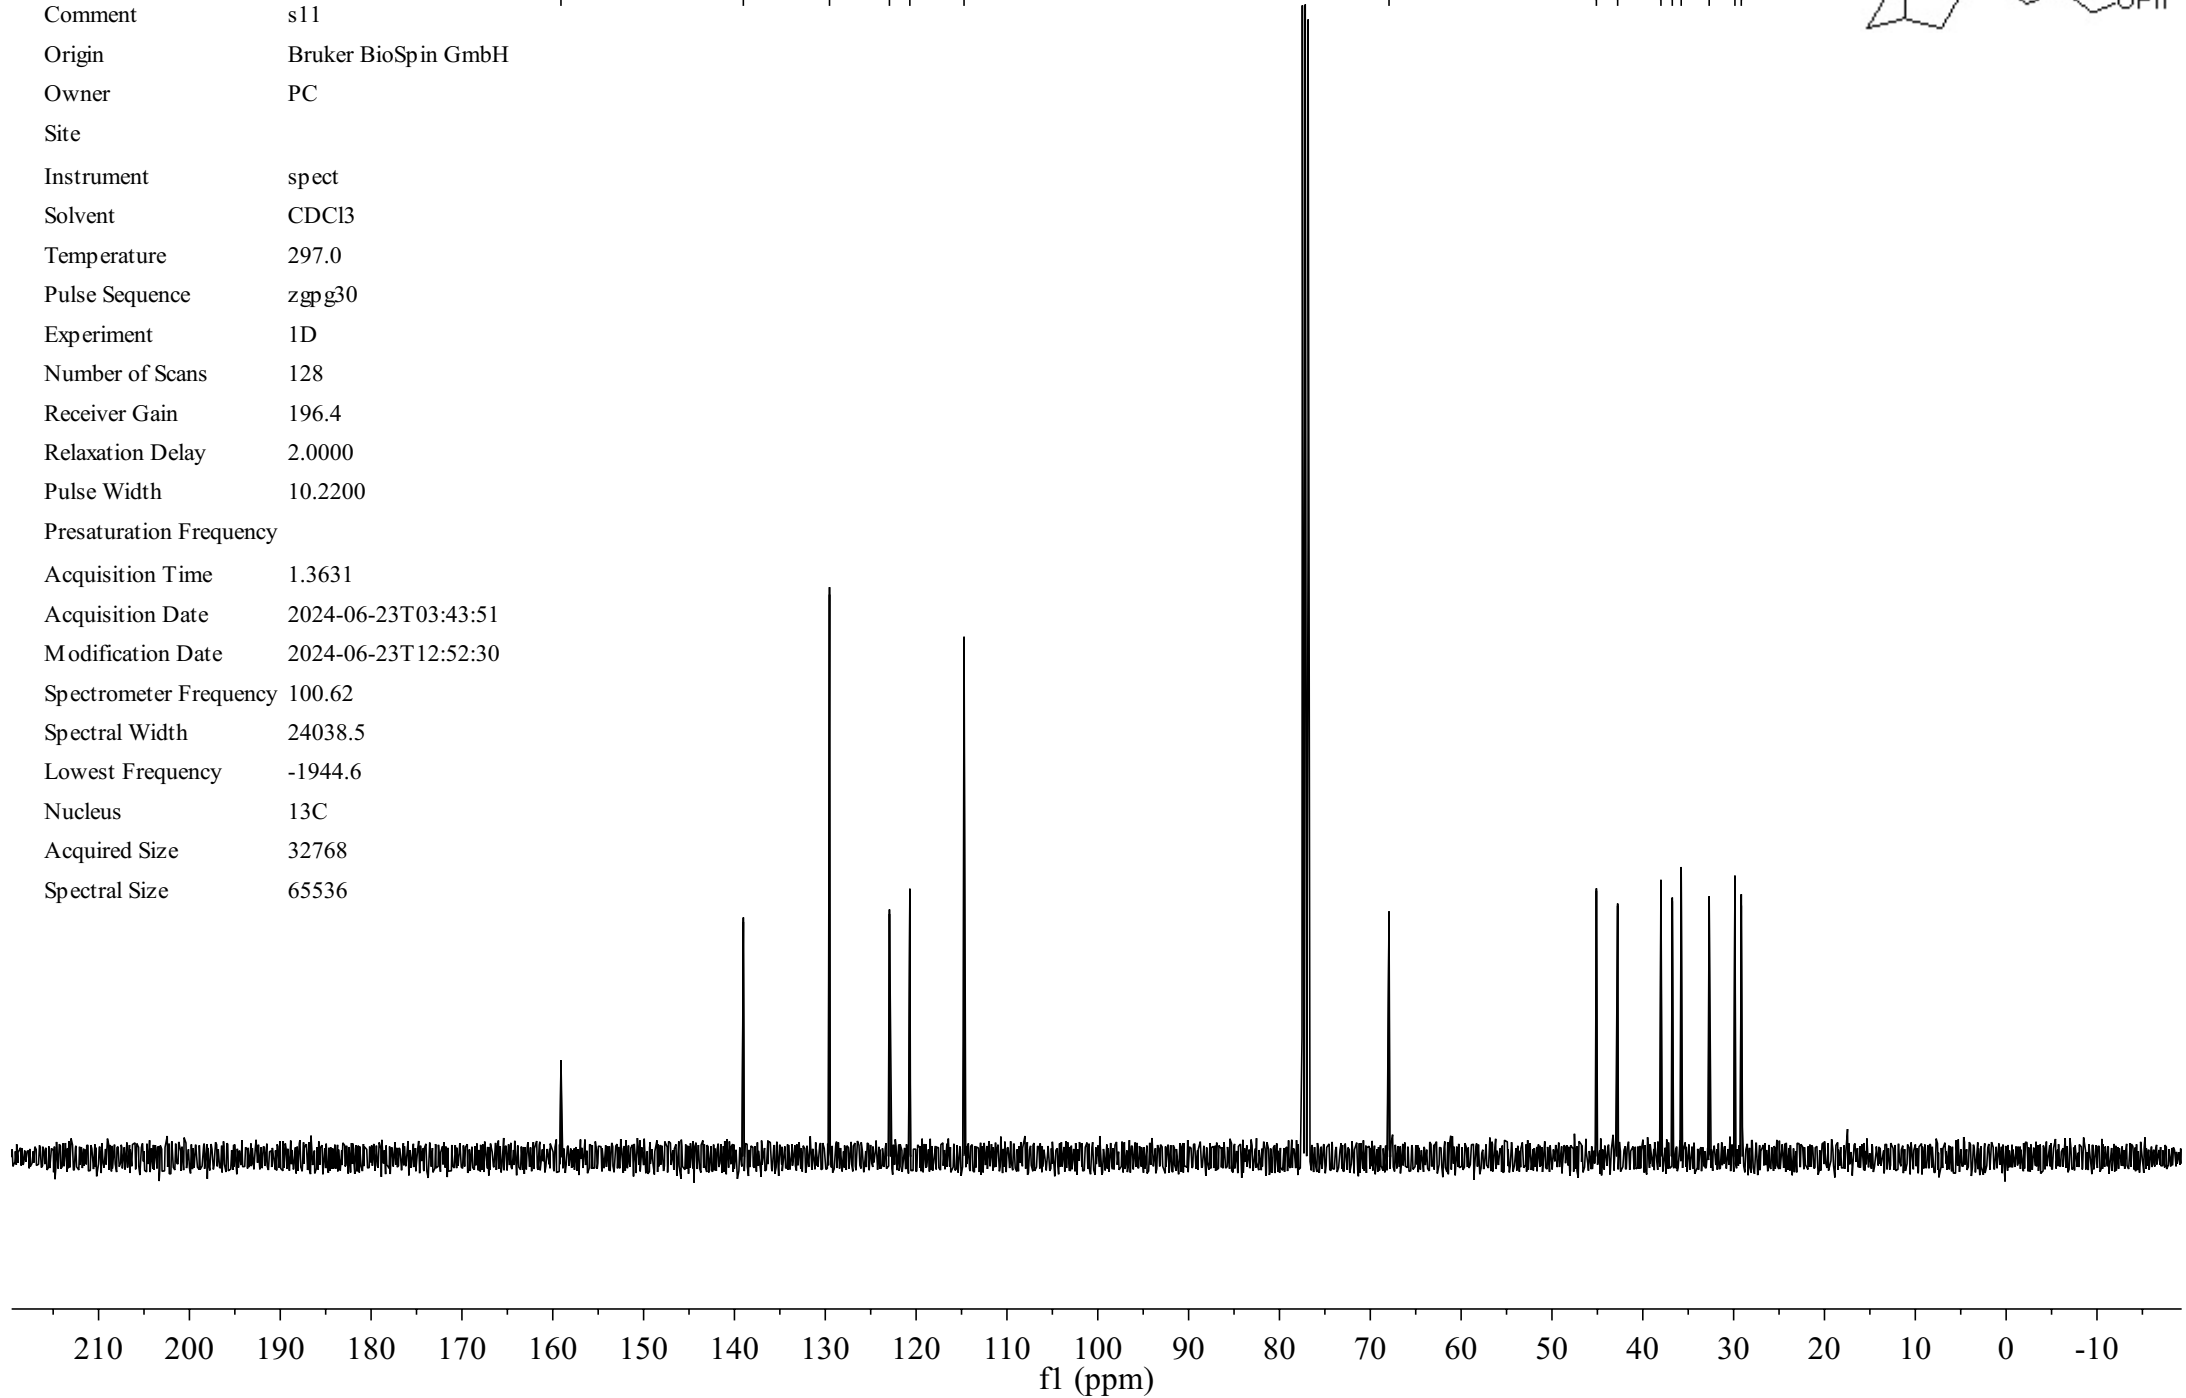

YM-20230414-1.3.fid

| Parameter               | Value               |
|-------------------------|---------------------|
| Title                   | YM-20230414-1.3.fid |
| Comment                 | S45-60              |
| Origin                  | Bruker BioSpin GmbH |
| Owner                   | PC                  |
| Site                    |                     |
| Instrument              | spect               |
| Solvent                 | CDC13               |
| Temperature             | 297.8               |
| Pulse Sequence          | zg30                |
| Experiment              | 1D                  |
| Number of Scans         | 8                   |
| Receiver Gain           | 142.1               |
| Relaxation Delay        | 1.0000              |
| Pulse Width             | 9.2600              |
| Presaturation Frequency |                     |
| Acquisition Time        | 1.9999              |
| Acquisition Date        | 2024-04-28T14:04:52 |
| Modification Date       | 2024-04-28T16:10:54 |
| Spectrometer Frequency  | 400.13              |
| Spectral Width          | 8012.8              |
| Lowest Frequency        | -1535.2             |
| Nucleus                 | 1H                  |
| Acquired Size           | 16025               |
| Spectral Size           | 65536               |

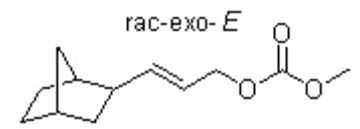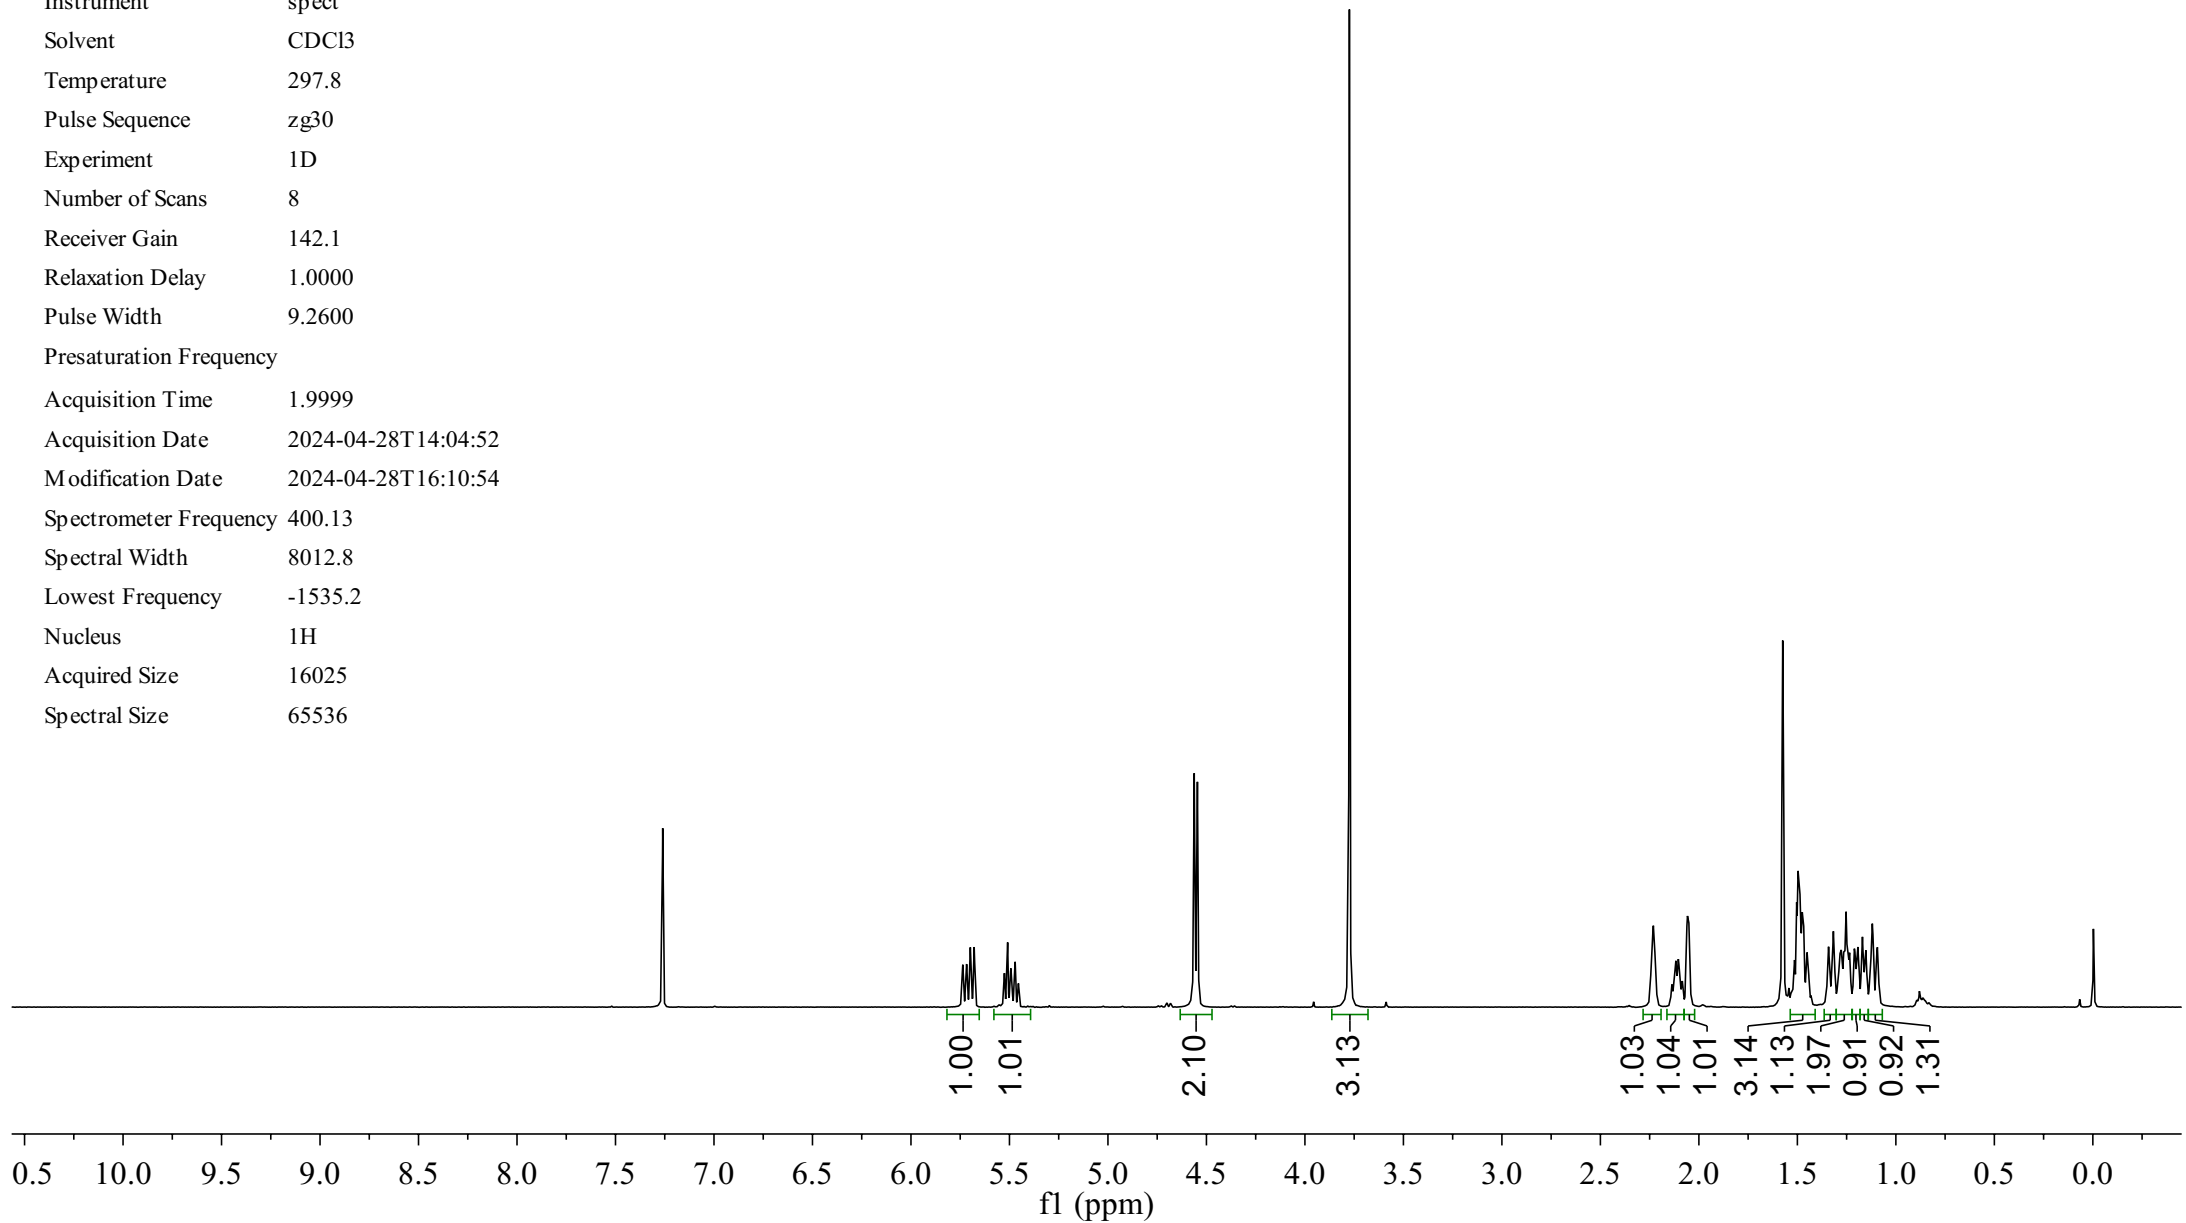

YM-20230414-1.2.fid

| Parameter               | Value               |
|-------------------------|---------------------|
| Title                   | YM-20230414-1.2.fid |
| Comment                 | S45-60              |
| Origin                  | Bruker BioSpin GmbH |
| Owner                   | nmr                 |
| Site                    |                     |
| Instrument              | spect               |
| Solvent                 | CDC13               |
| Temperature             | 296.1               |
| Pulse Sequence          | zgpg30              |
| Experiment              | 1D                  |
| Number of Scans         | 32                  |
| Receiver Gain           | 193.1               |
| Relaxation Delay        | 2.0000              |
| Pulse Width             | 9.9400              |
| Presaturation Frequency |                     |
| Acquisition Time        | 1.1010              |
| Acquisition Date        | 2024-04-27T17:51:32 |
| Modification Date       | 2024-04-27T20:10:58 |
| Spectrometer Frequency  | 125.77              |
| Spectral Width          | 29761.9             |
| Lowest Frequency        | -2289.3             |
| Nucleus                 | 13C                 |
| Acquired Size           | 32768               |
| Spectral Size           | 65536               |

—155.8

—142.8

—120.7

—69.0

—54.8

44.7

42.3

37.6

36.7

35.8

29.8

29.1

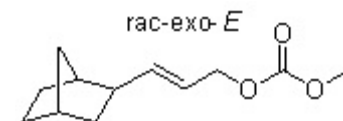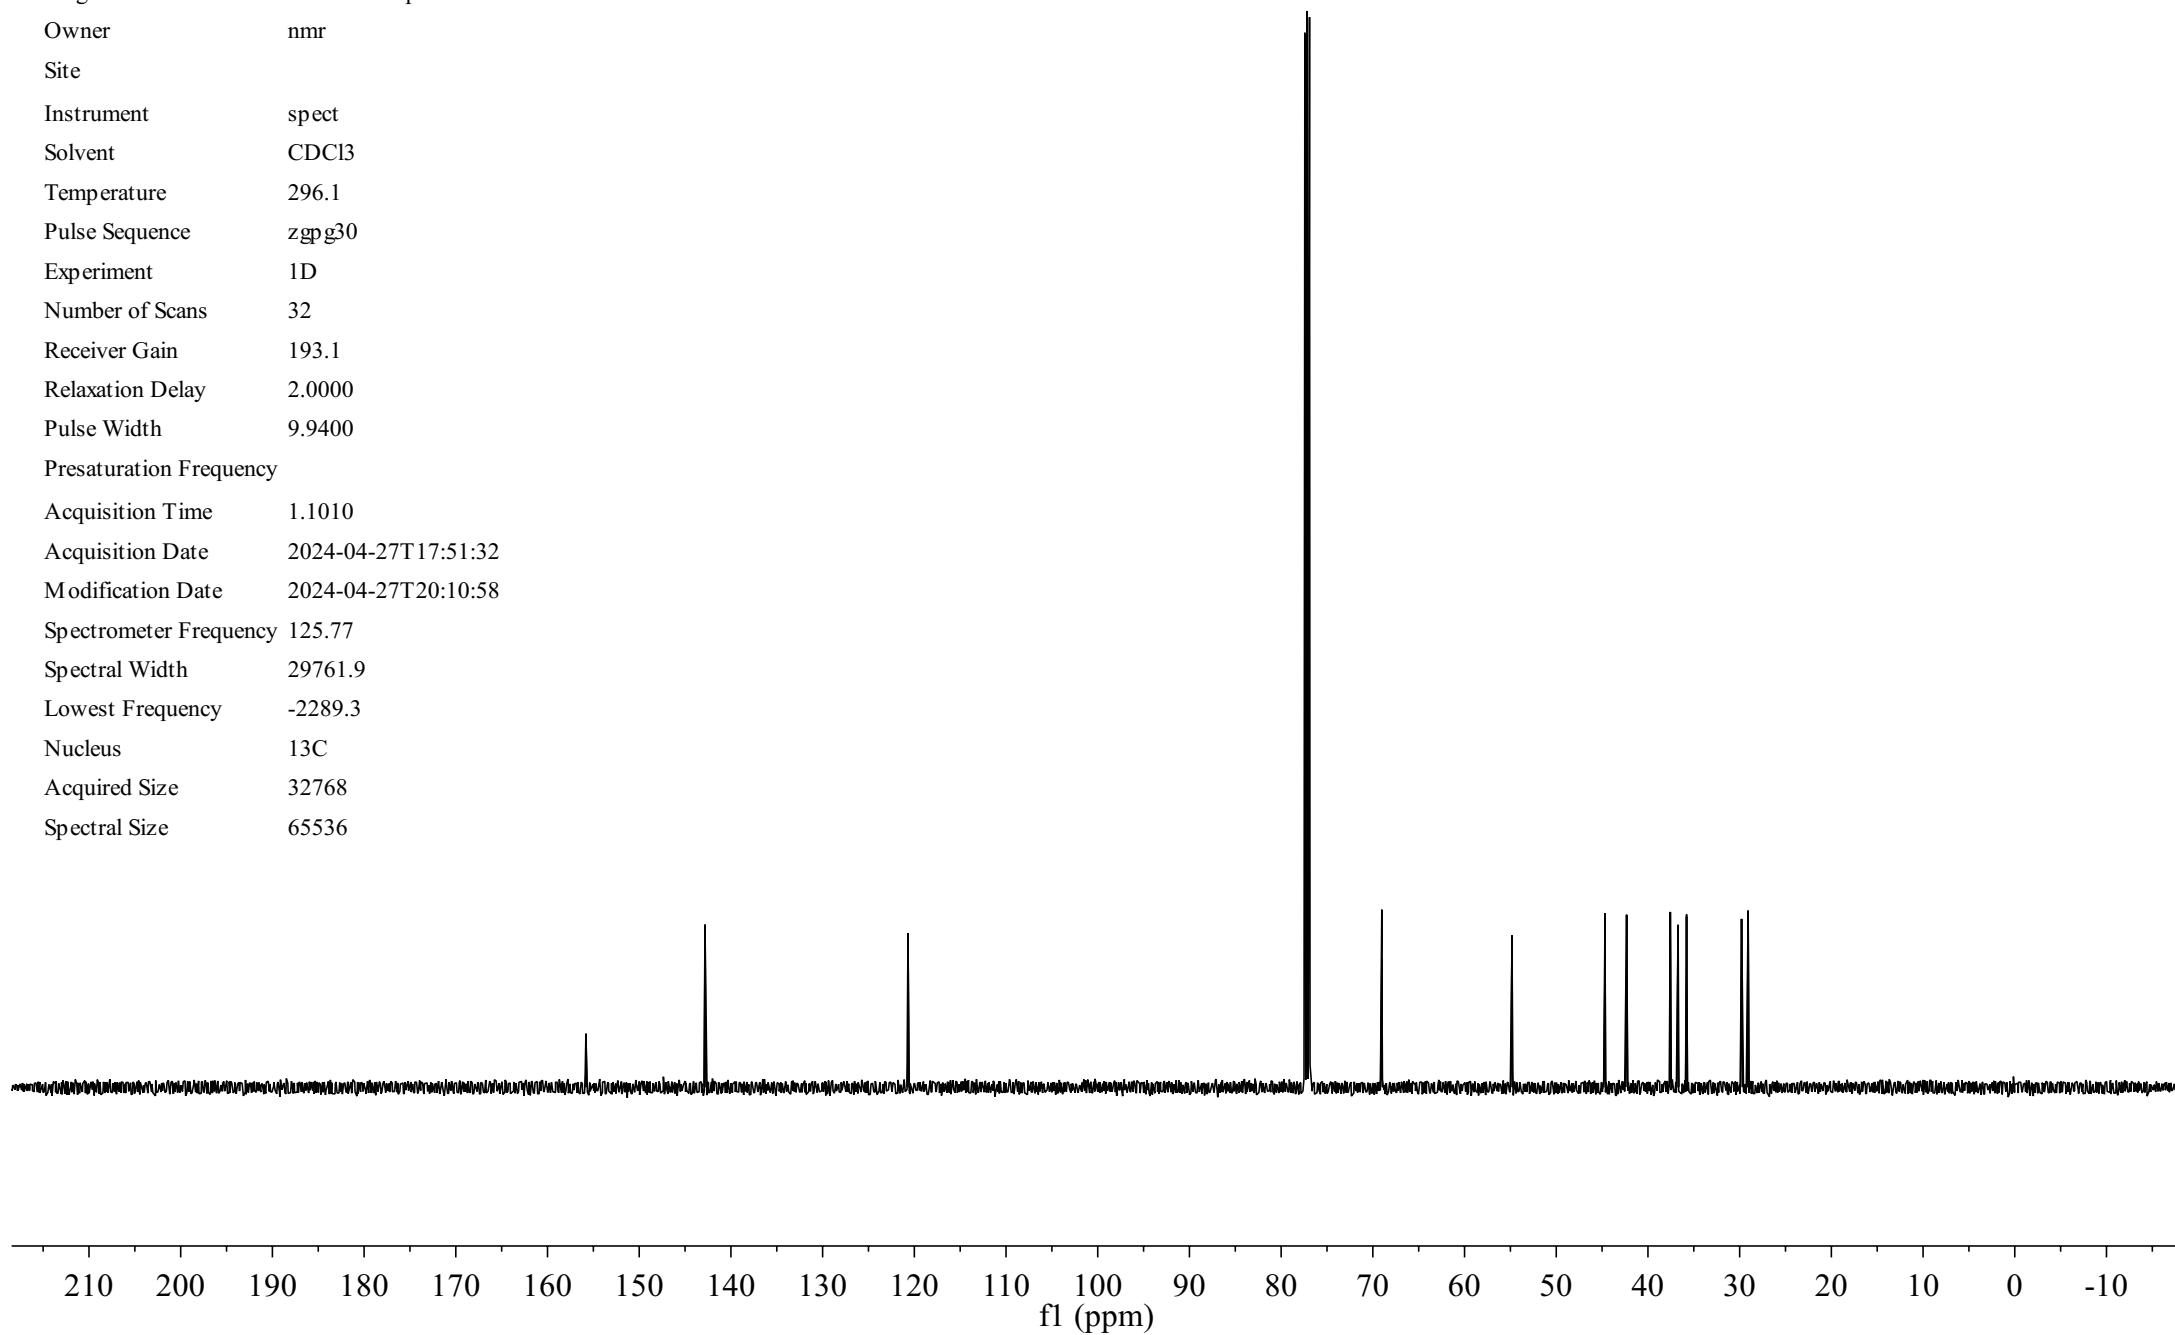



YM-20240422-5-iso. 3. fid

| Parameter               | Value                   |
|-------------------------|-------------------------|
| Title                   | YM-20240422-5-iso.3.fid |
| Comment                 | S50                     |
| Origin                  | Bruker BioSpin GmbH     |
| Owner                   | nmrsu                   |
| Site                    |                         |
| Instrument              | Avance NEO 600          |
| Solvent                 | CDC13                   |
| Temperature             | 293.2                   |
| Pulse Sequence          | zg30                    |
| Experiment              | 1D                      |
| Number of Scans         | 12                      |
| Receiver Gain           | 101.0                   |
| Relaxation Delay        | 1.0000                  |
| Pulse Width             | 9.2200                  |
| Presaturation Frequency |                         |
| Acquisition Time        | 2.7525                  |
| Acquisition Date        | 2024-04-27T13:11:29     |
| Modification Date       | 2024-04-27T13:19:50     |
| Spectrometer Frequency  | 600.20                  |
| Spectral Width          | 11904.8                 |
| Lowest Frequency        | -2260.0                 |
| Nucleus                 | 1H                      |
| Acquired Size           | 32768                   |
| Spectral Size           | 131072                  |

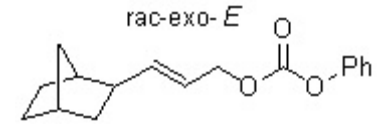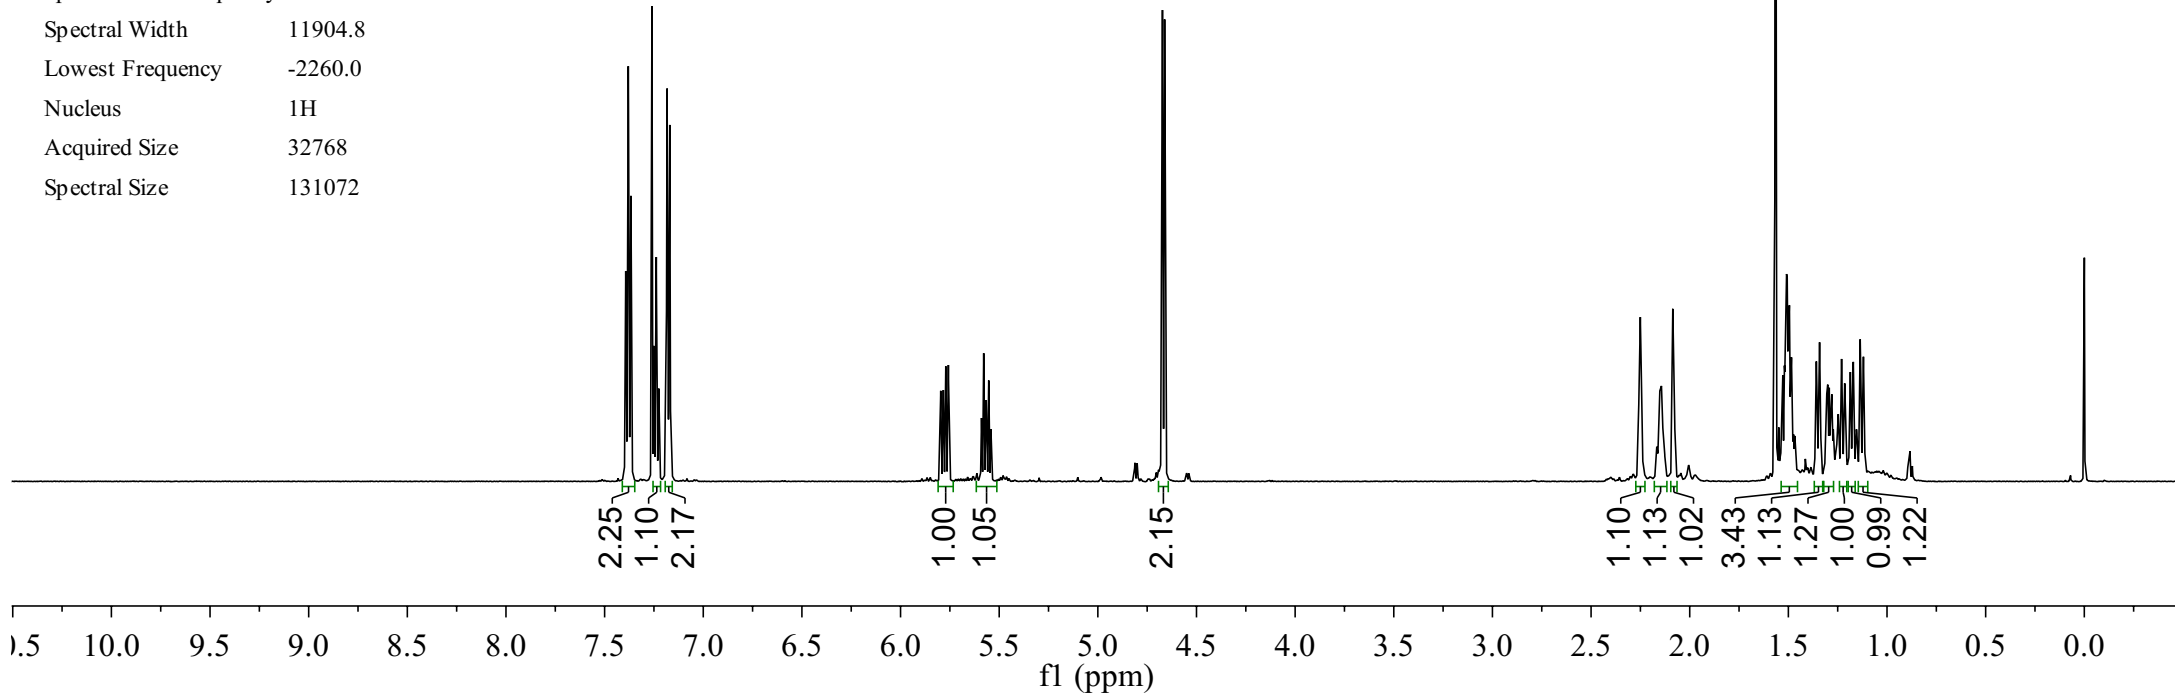

YM-20240422-5-iso. 2. fid

S51

| Parameter               | Value                   |
|-------------------------|-------------------------|
| Title                   | YM-20240422-5-iso.2.fid |
| Comment                 | S51                     |
| Origin                  | Bruker BioSpin GmbH     |
| Owner                   | nmrsu                   |
| Site                    |                         |
| Instrument              | Avance NEO 600          |
| Solvent                 | CDC13                   |
| Temperature             | 293.6                   |
| Pulse Sequence          | zgpg30                  |
| Experiment              | 1D                      |
| Number of Scans         | 32                      |
| Receiver Gain           | 101.0                   |
| Relaxation Delay        | 2.0000                  |
| Pulse Width             | 11.7300                 |
| Presaturation Frequency |                         |
| Acquisition Time        | 0.9175                  |
| Acquisition Date        | 2024-04-27T13:06:14     |
| Modification Date       | 2024-04-27T13:19:50     |
| Spectrometer Frequency  | 150.94                  |
| Spectral Width          | 35714.3                 |
| Lowest Frequency        | -2744.4                 |
| Nucleus                 | <sup>13</sup> C         |
| Acquired Size           | 32768                   |
| Spectral Size           | 65536                   |

153.7  
151.3  
143.5

129.6  
126.1  
121.2  
120.3

69.7

44.7  
42.3  
37.6  
36.7  
35.8  
29.8  
29.1

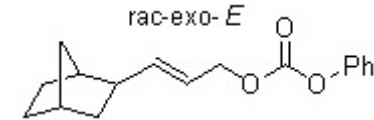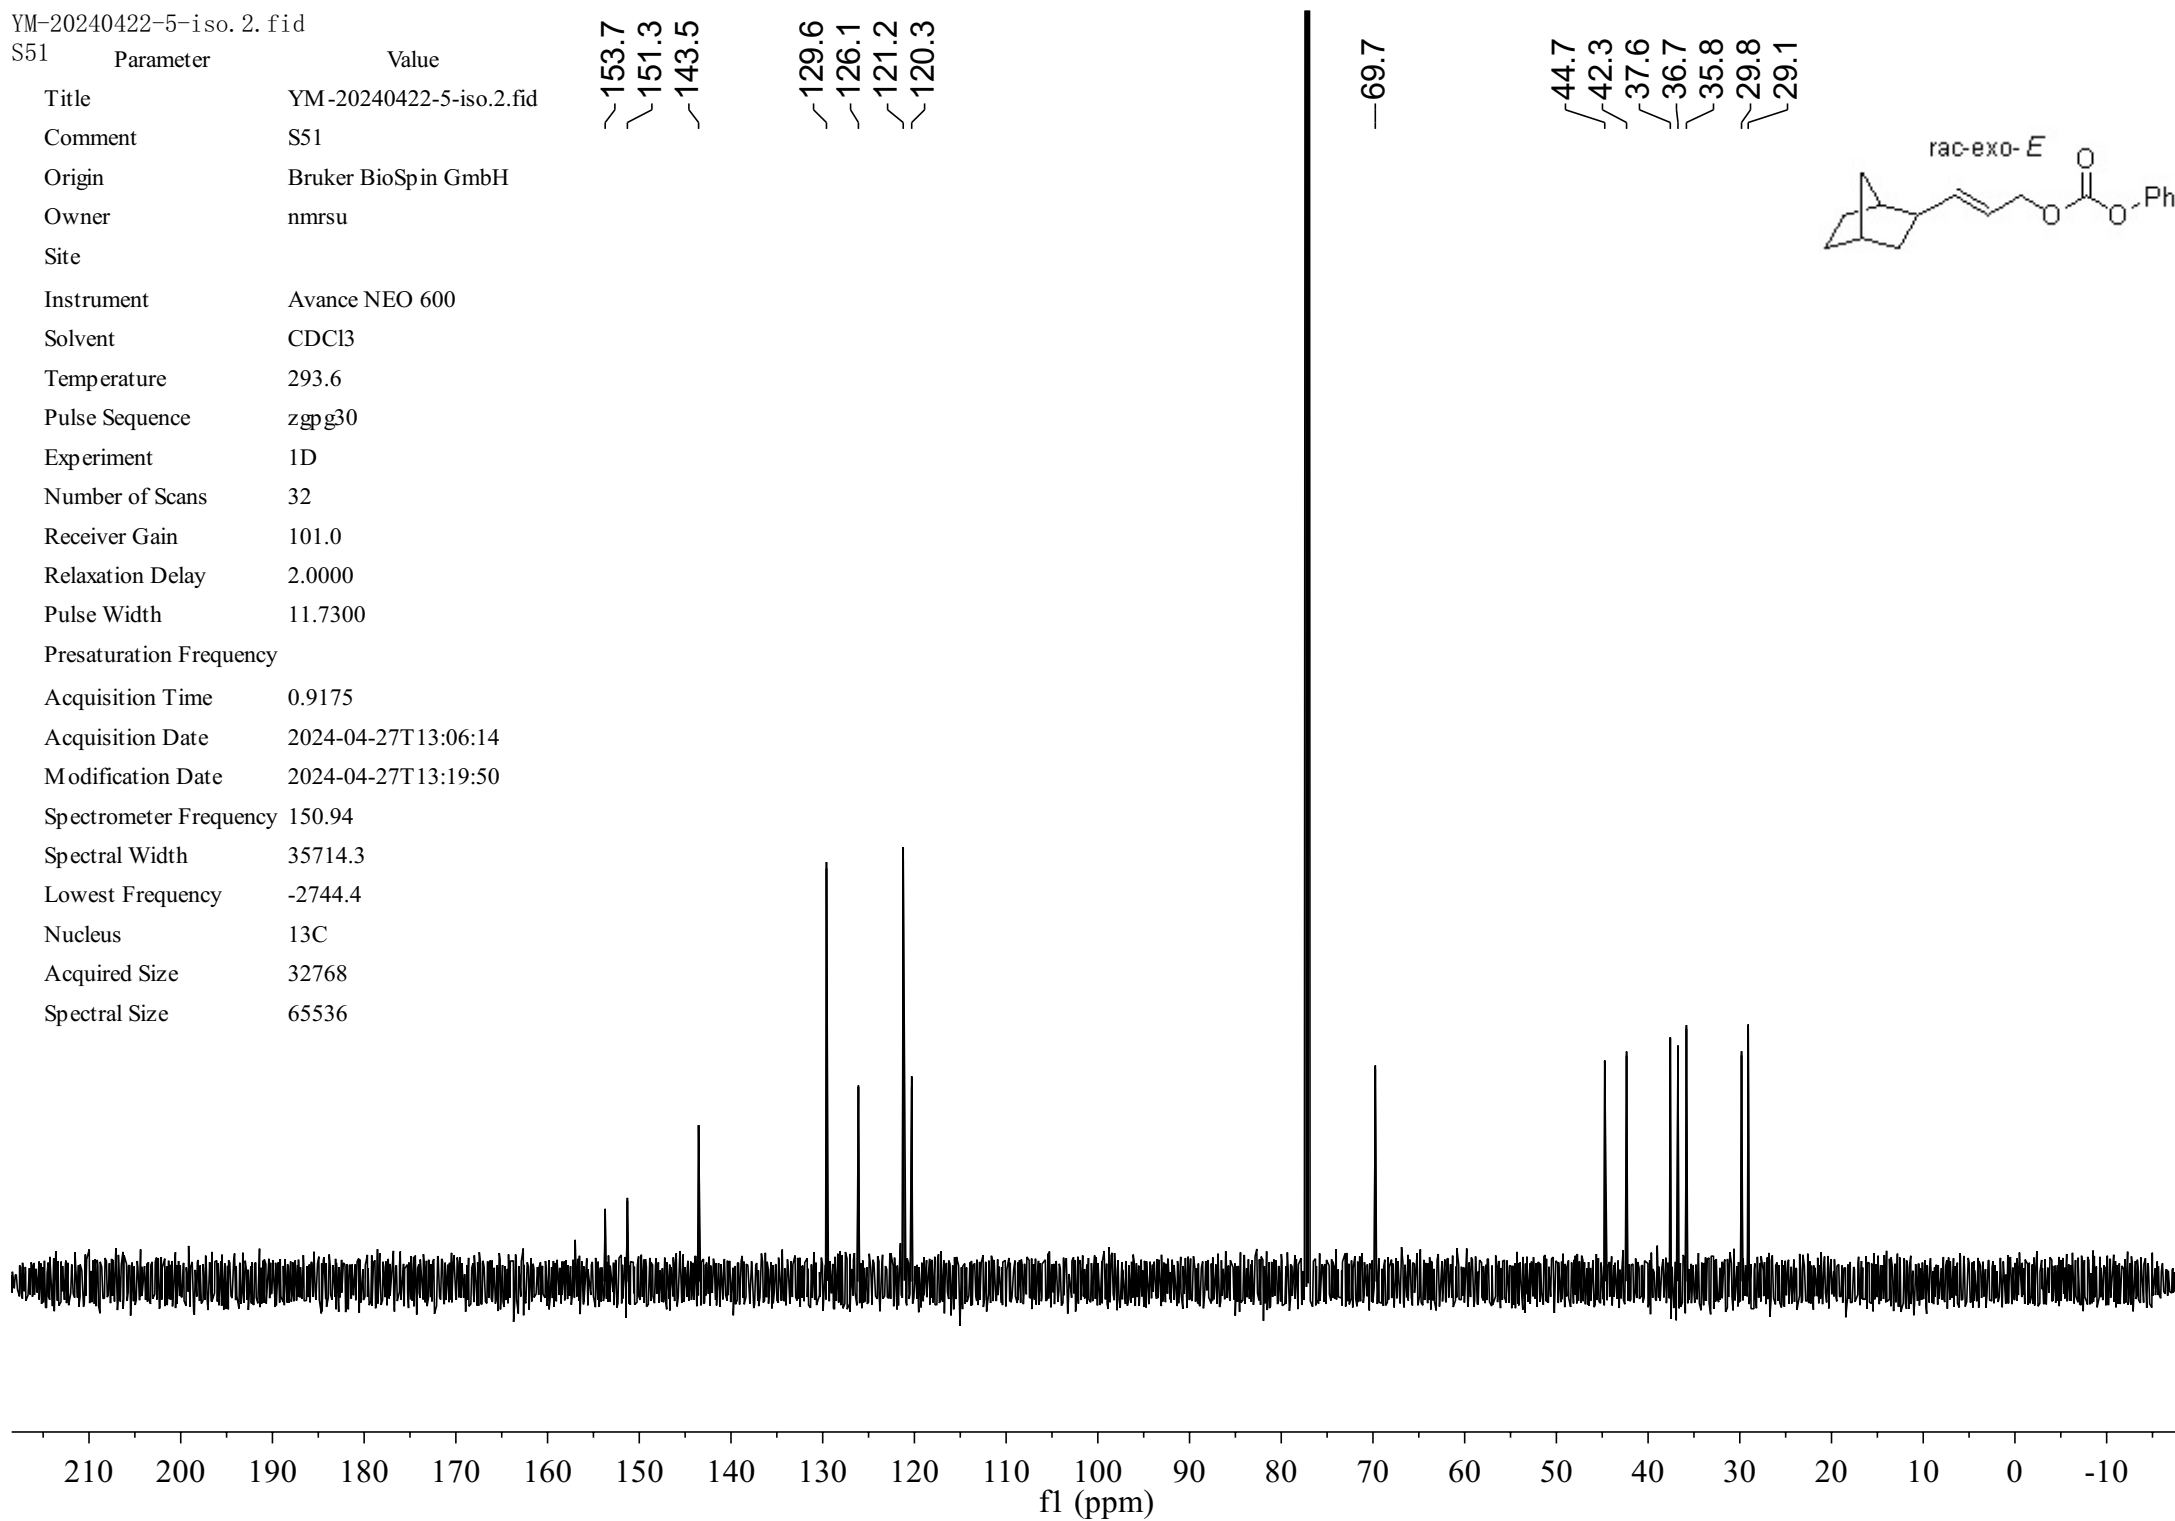

| Parameter               | Value                 |
|-------------------------|-----------------------|
| Title                   | YM-20210427-4-1.1.fid |
| Comment                 |                       |
| Origin                  | Bruker BioSpin GmbH   |
| Owner                   | nmr                   |
| Site                    |                       |
| Instrument              | spect                 |
| Solvent                 | CDCl3                 |
| Temperature             | 296.2                 |
| Pulse Sequence          | zg30                  |
| Experiment              | 1D                    |
| Number of Scans         | 16                    |
| Receiver Gain           | 54.3                  |
| Relaxation Delay        | 1.0000                |
| Pulse Width             | 11.3200               |
| Presaturation Frequency |                       |
| Acquisition Time        | 3.2768                |
| Acquisition Date        | 2021-05-12T19:55:00   |
| Modification Date       | 2021-05-12T20:43:01   |
| Spectrometer Frequency  | 500.13                |
| Spectral Width          | 10000.0               |
| Lowest Frequency        | -1923.7               |
| Nucleus                 | 1H                    |
| Acquired Size           | 32768                 |
| Spectral Size           | 65536                 |

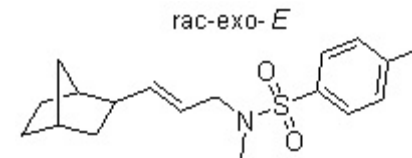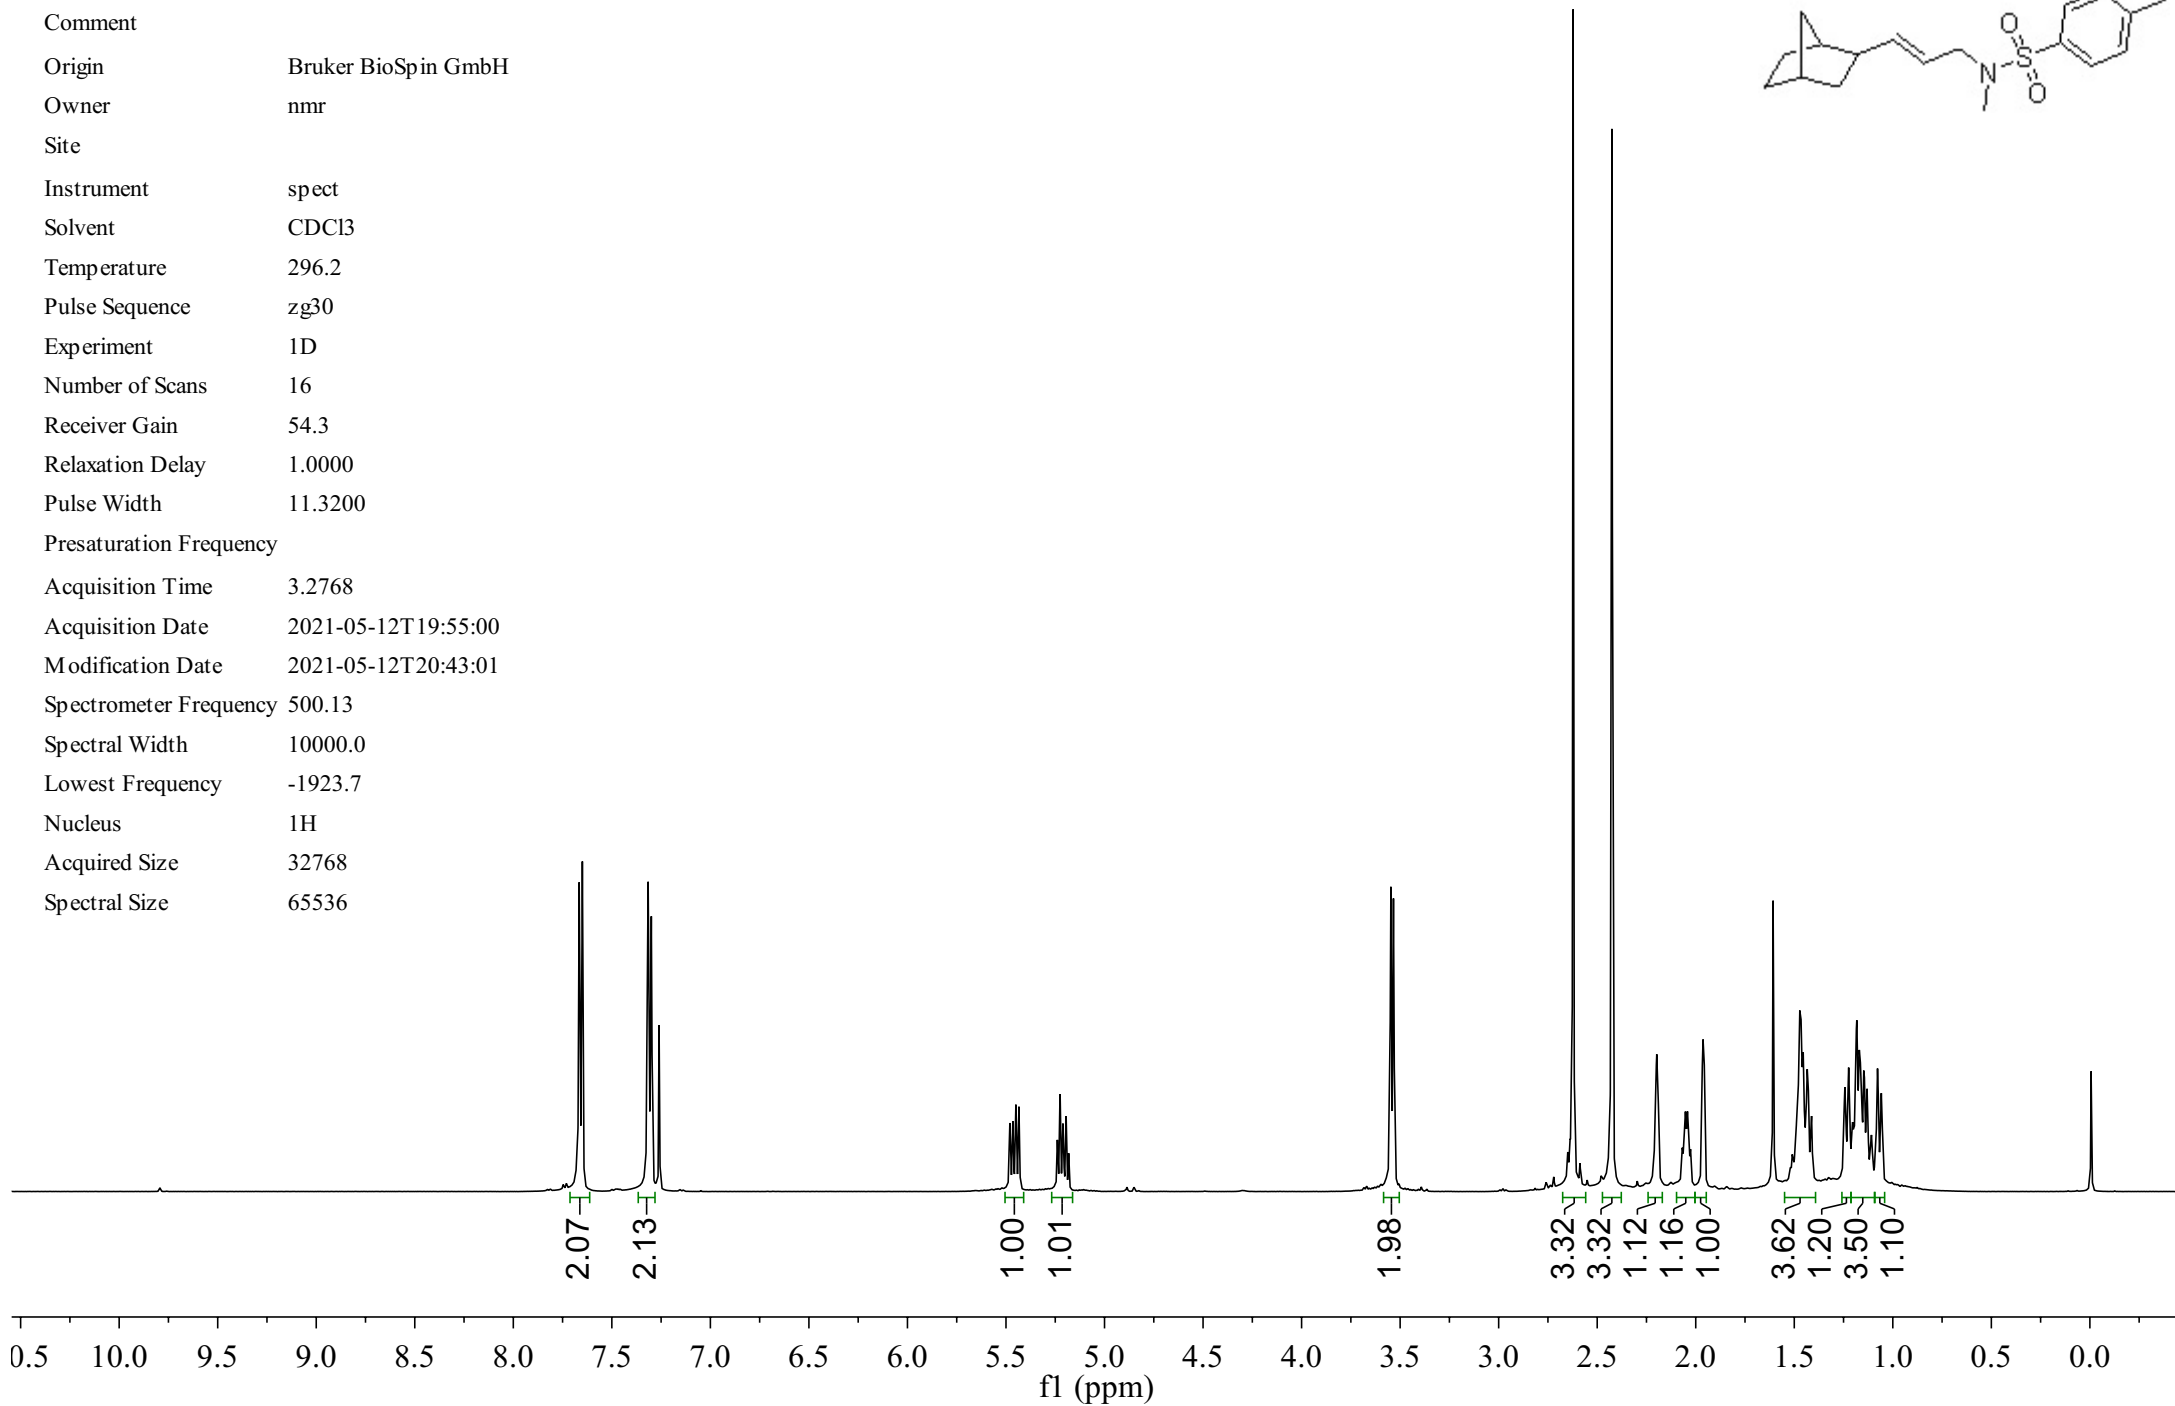

YM-20210427-4-1.2.fid

| Parameter               | Value                 |
|-------------------------|-----------------------|
| Title                   | YM-20210427-4-1.2.fid |
| Comment                 |                       |
| Origin                  | Bruker BioSpin GmbH   |
| Owner                   | nmr                   |
| Site                    |                       |
| Instrument              | spect                 |
| Solvent                 | CDC13                 |
| Temperature             | 296.1                 |
| Pulse Sequence          | zgpg30                |
| Experiment              | 1D                    |
| Number of Scans         | 39                    |
| Receiver Gain           | 193.1                 |
| Relaxation Delay        | 2.0000                |
| Pulse Width             | 9.9400                |
| Presaturation Frequency |                       |
| Acquisition Time        | 1.1010                |
| Acquisition Date        | 2021-05-12T19:57:00   |
| Modification Date       | 2022-01-07T20:27:04   |
| Spectrometer Frequency  | 125.77                |
| Spectral Width          | 29761.9               |
| Lowest Frequency        | -2290.8               |
| Nucleus                 | <sup>13</sup> C       |
| Acquired Size           | 32768                 |
| Spectral Size           | 65536                 |

143.4  
141.7  
134.6  
129.7  
127.6  
121.3

52.6  
44.5  
42.4  
37.7  
36.7  
35.7  
34.0  
29.7  
29.0  
21.6

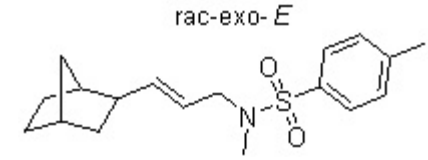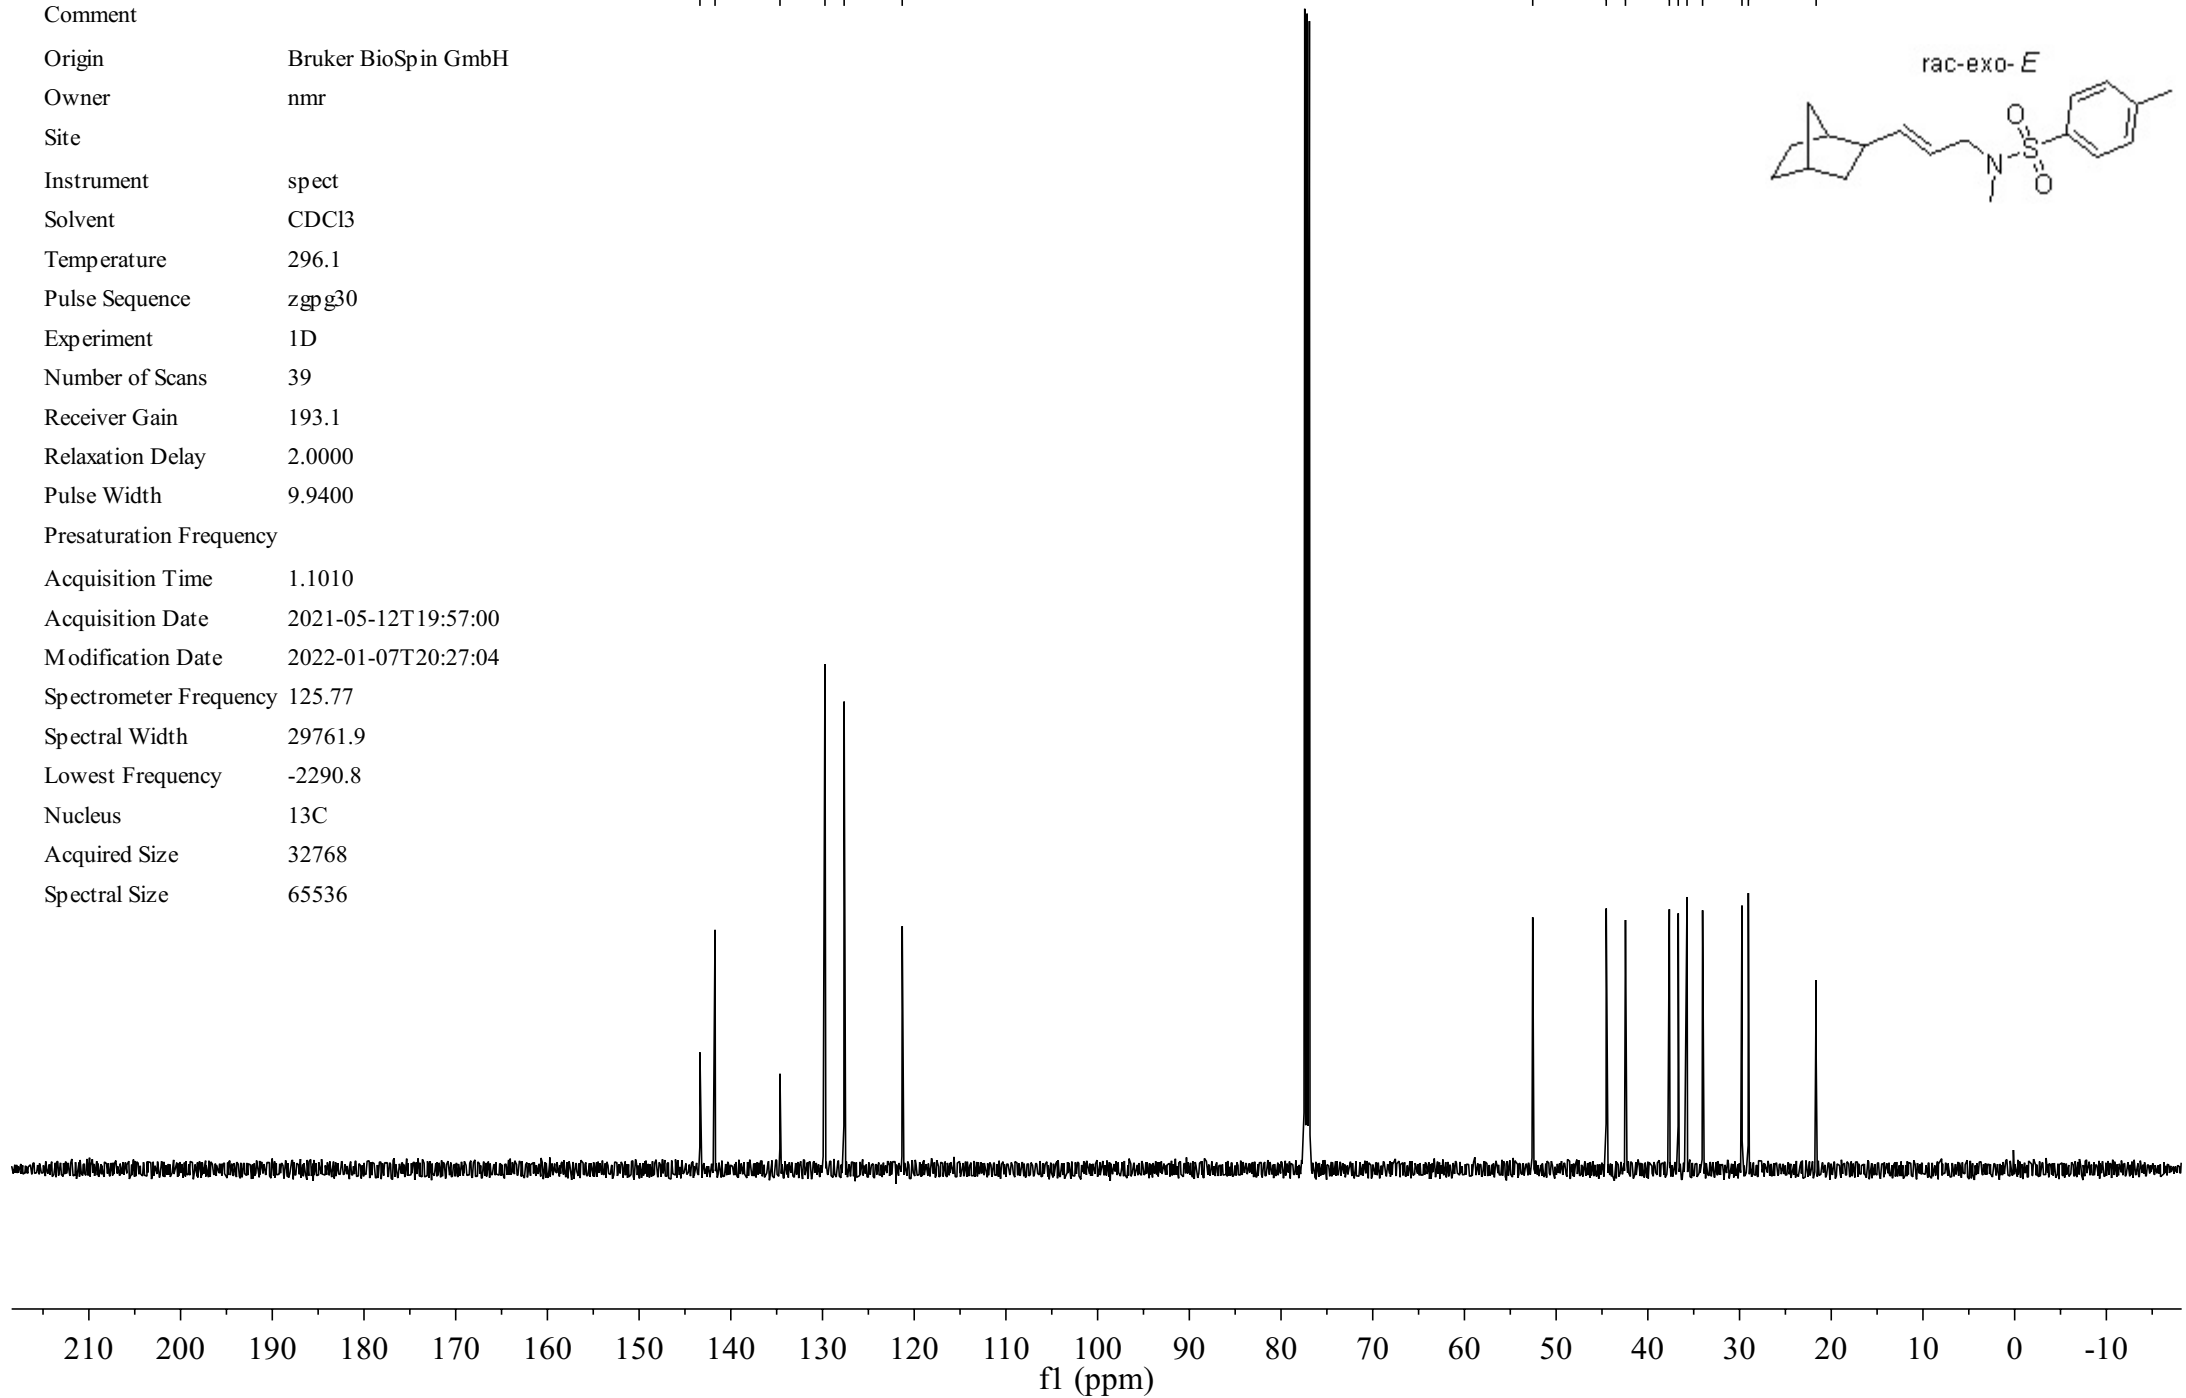

| Parameter               | Value               |
|-------------------------|---------------------|
| Title                   | YM-20240423-1.3.fid |
| Comment                 | s17                 |
| Origin                  | Bruker BioSpin GmbH |
| Owner                   | PC                  |
| Site                    |                     |
| Instrument              | spect               |
| Solvent                 | CDC13               |
| Temperature             | 297.8               |
| Pulse Sequence          | zg30                |
| Experiment              | 1D                  |
| Number of Scans         | 8                   |
| Receiver Gain           | 142.1               |
| Relaxation Delay        | 1.0000              |
| Pulse Width             | 9.2600              |
| Presaturation Frequency |                     |
| Acquisition Time        | 1.9999              |
| Acquisition Date        | 2024-04-23T20:58:02 |
| Modification Date       | 2024-04-23T21:46:01 |
| Spectrometer Frequency  | 400.13              |
| Spectral Width          | 8012.8              |
| Lowest Frequency        | -1535.2             |
| Nucleus                 | <sup>1</sup> H      |
| Acquired Size           | 16025               |
| Spectral Size           | 65536               |

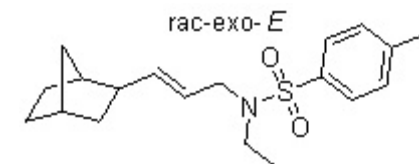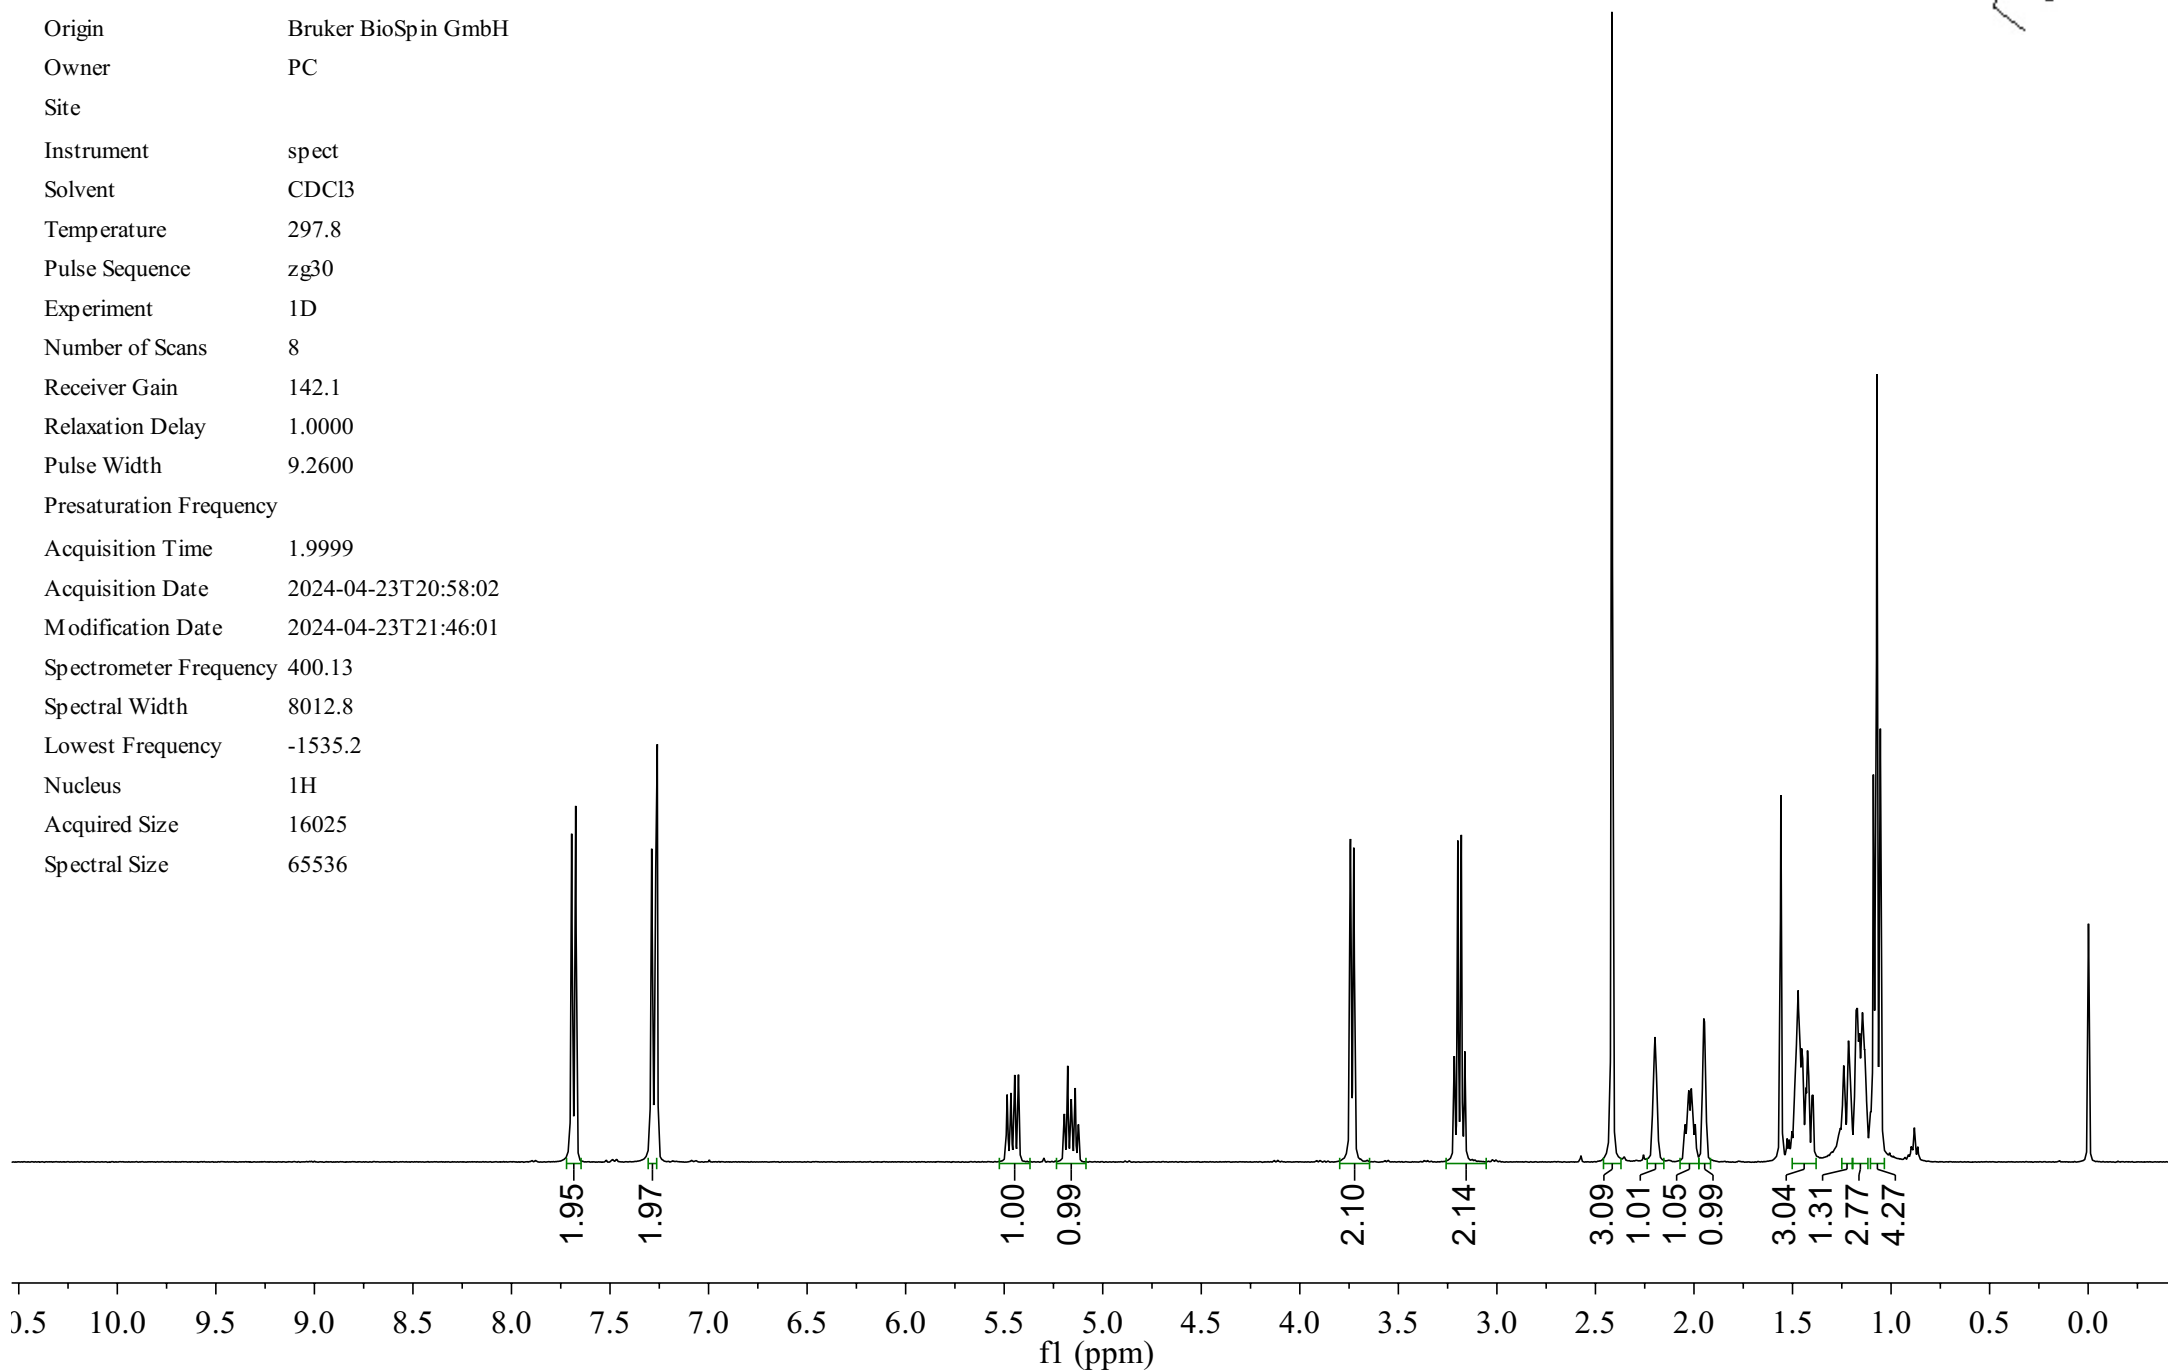

YM-20240423-1.4.fid

s17

| Parameter               | Value               |
|-------------------------|---------------------|
| Title                   | YM-20240423-1.4.fid |
| Comment                 | s17                 |
| Origin                  | Bruker BioSpin GmbH |
| Owner                   | PC                  |
| Site                    |                     |
| Instrument              | spect               |
| Solvent                 | CDC13               |
| Temperature             | 298.1               |
| Pulse Sequence          | zgpg30              |
| Experiment              | 1D                  |
| Number of Scans         | 128                 |
| Receiver Gain           | 196.4               |
| Relaxation Delay        | 2.0000              |
| Pulse Width             | 10.2200             |
| Presaturation Frequency |                     |
| Acquisition Time        | 1.2976              |
| Acquisition Date        | 2024-04-23T21:01:31 |
| Modification Date       | 2024-04-23T21:46:02 |
| Spectrometer Frequency  | 100.62              |
| Spectral Width          | 25252.5             |
| Lowest Frequency        | -539.1              |
| Nucleus                 | 13C                 |
| Acquired Size           | 32768               |
| Spectral Size           | 65536               |

143.0  
140.9  
137.7  
129.7  
127.3  
122.0

49.3  
44.5  
42.4  
41.6  
37.6  
36.7  
35.7  
29.8  
29.1  
21.6  
13.9

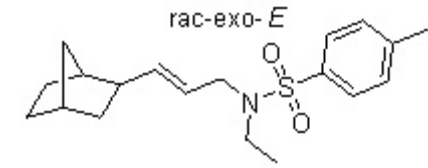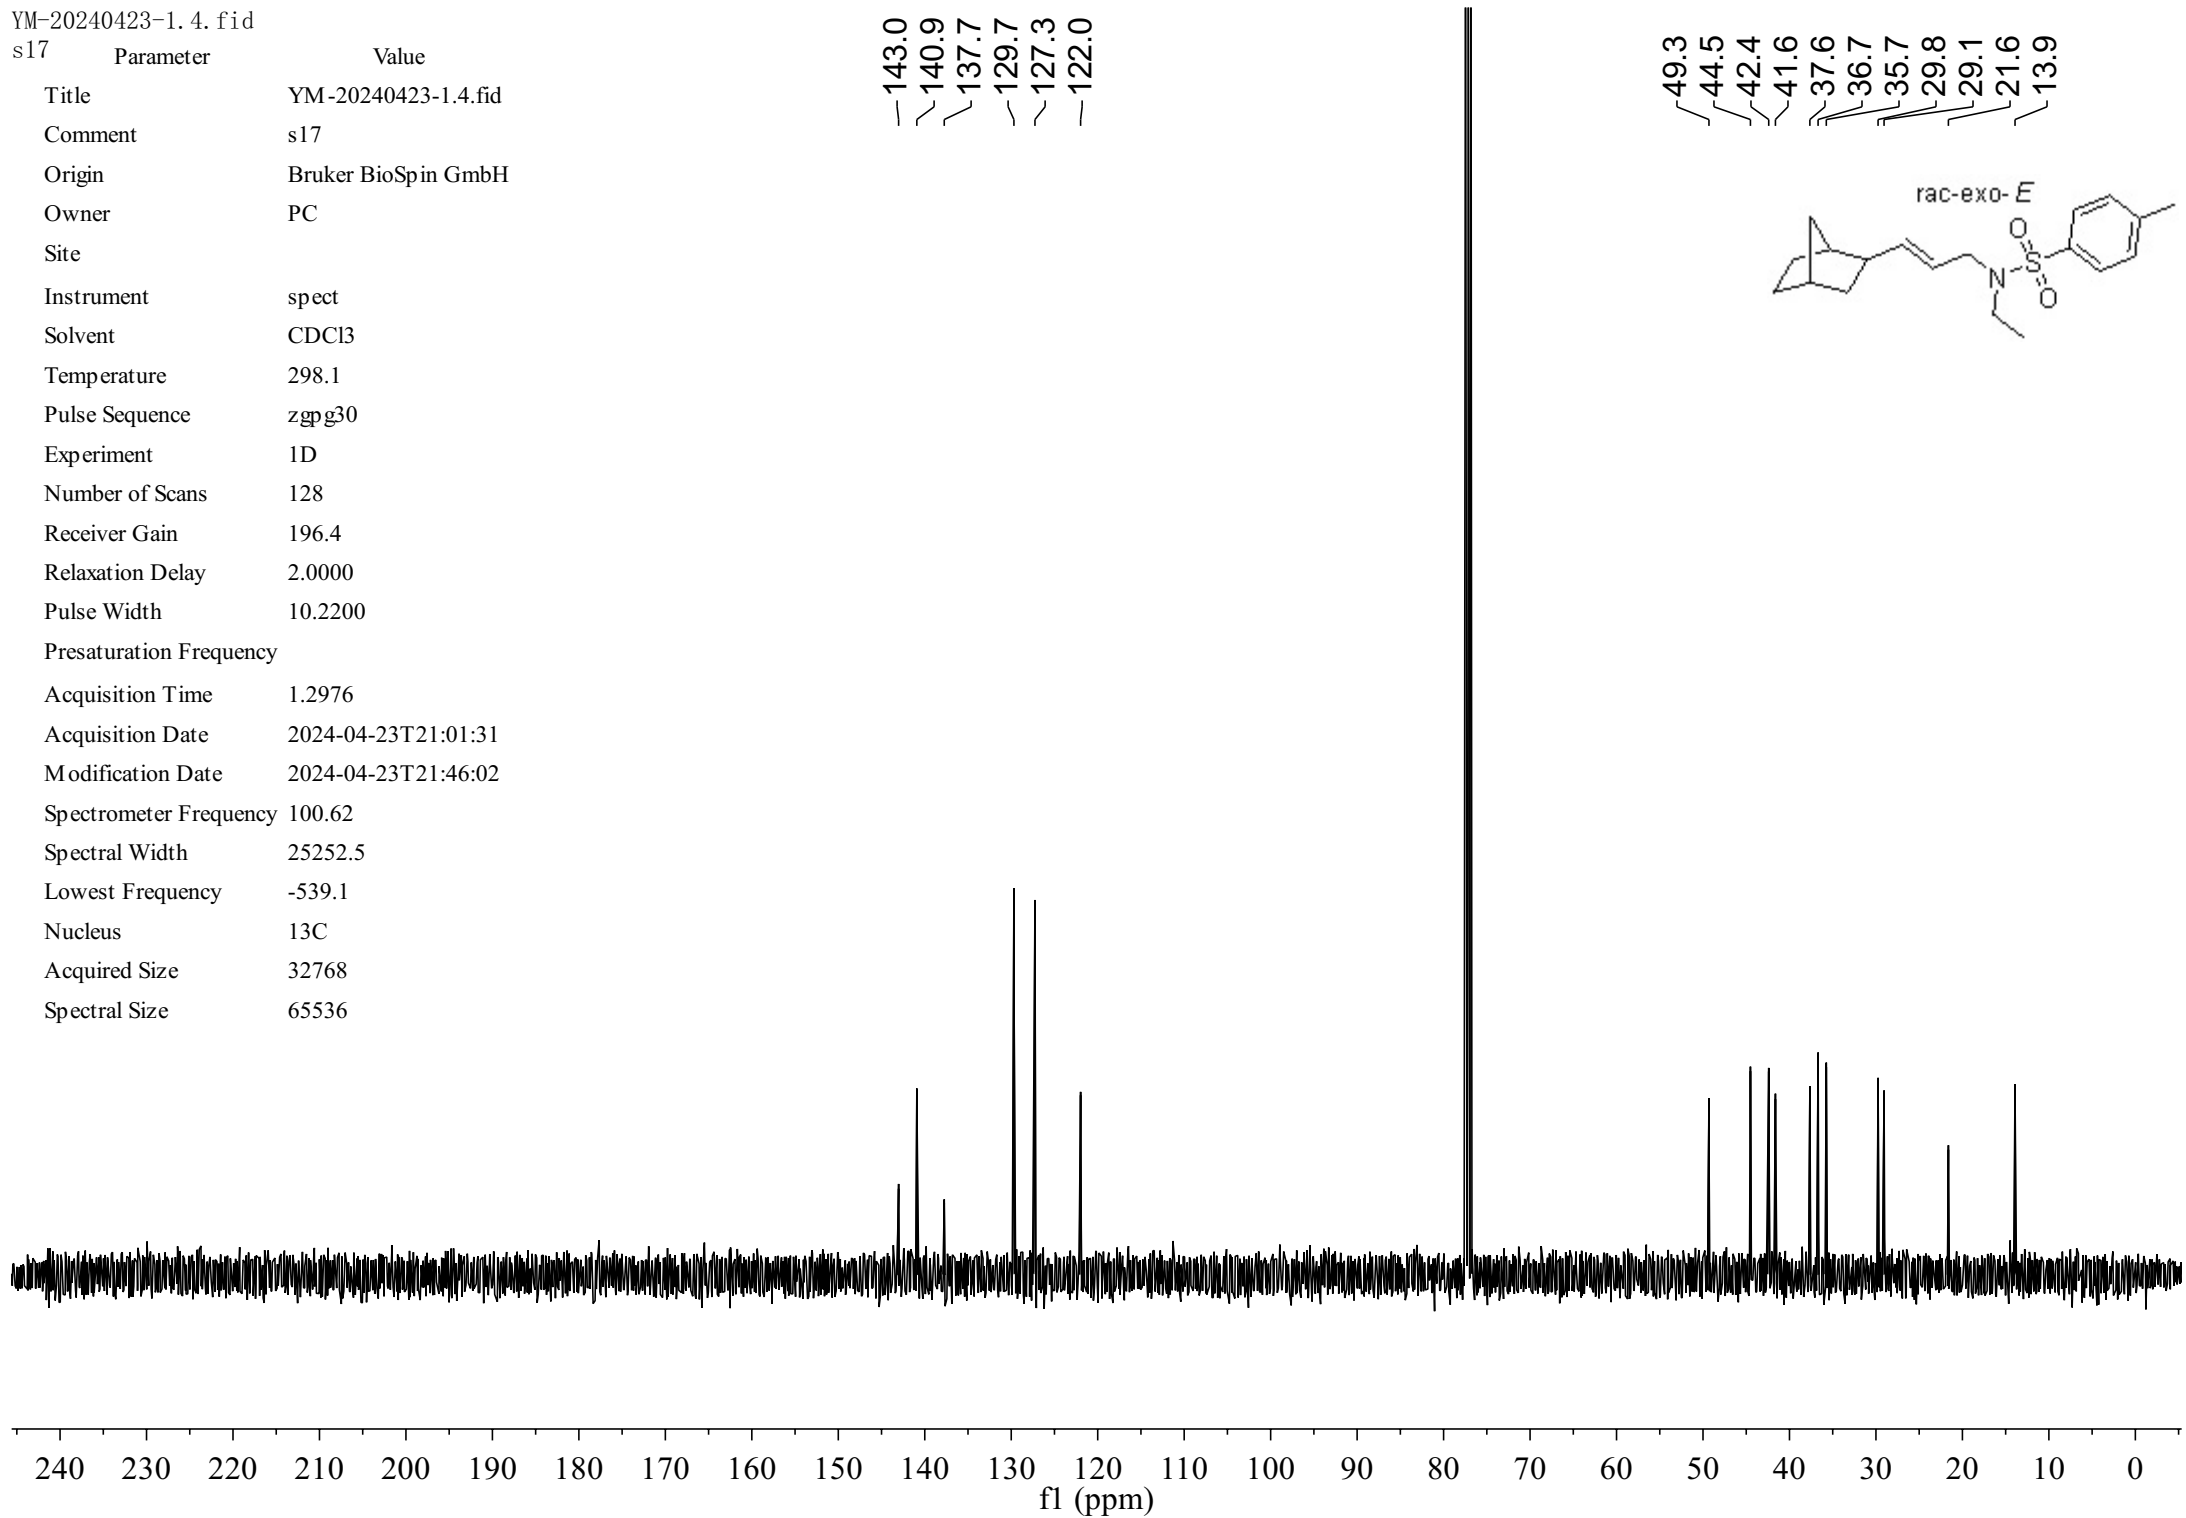

YM-20240422-4-iso.4.fid

| Parameter               | Value                   |
|-------------------------|-------------------------|
| Title                   | YM-20240422-4-iso.4.fid |
| Comment                 | s15                     |
| Origin                  | Bruker BioSpin GmbH     |
| Owner                   | PC                      |
| Site                    |                         |
| Instrument              | spect                   |
| Solvent                 | CDC13                   |
| Temperature             | 297.5                   |
| Pulse Sequence          | zg30                    |
| Experiment              | 1D                      |
| Number of Scans         | 8                       |
| Receiver Gain           | 62.3                    |
| Relaxation Delay        | 1.0000                  |
| Pulse Width             | 9.2600                  |
| Presaturation Frequency |                         |
| Acquisition Time        | 1.9999                  |
| Acquisition Date        | 2024-04-28T22:16:02     |
| Modification Date       | 2024-05-06T22:30:39     |
| Spectrometer Frequency  | 400.13                  |
| Spectral Width          | 8012.8                  |
| Lowest Frequency        | -1535.2                 |
| Nucleus                 | 1H                      |
| Acquired Size           | 16025                   |
| Spectral Size           | 65536                   |

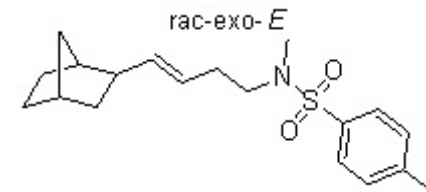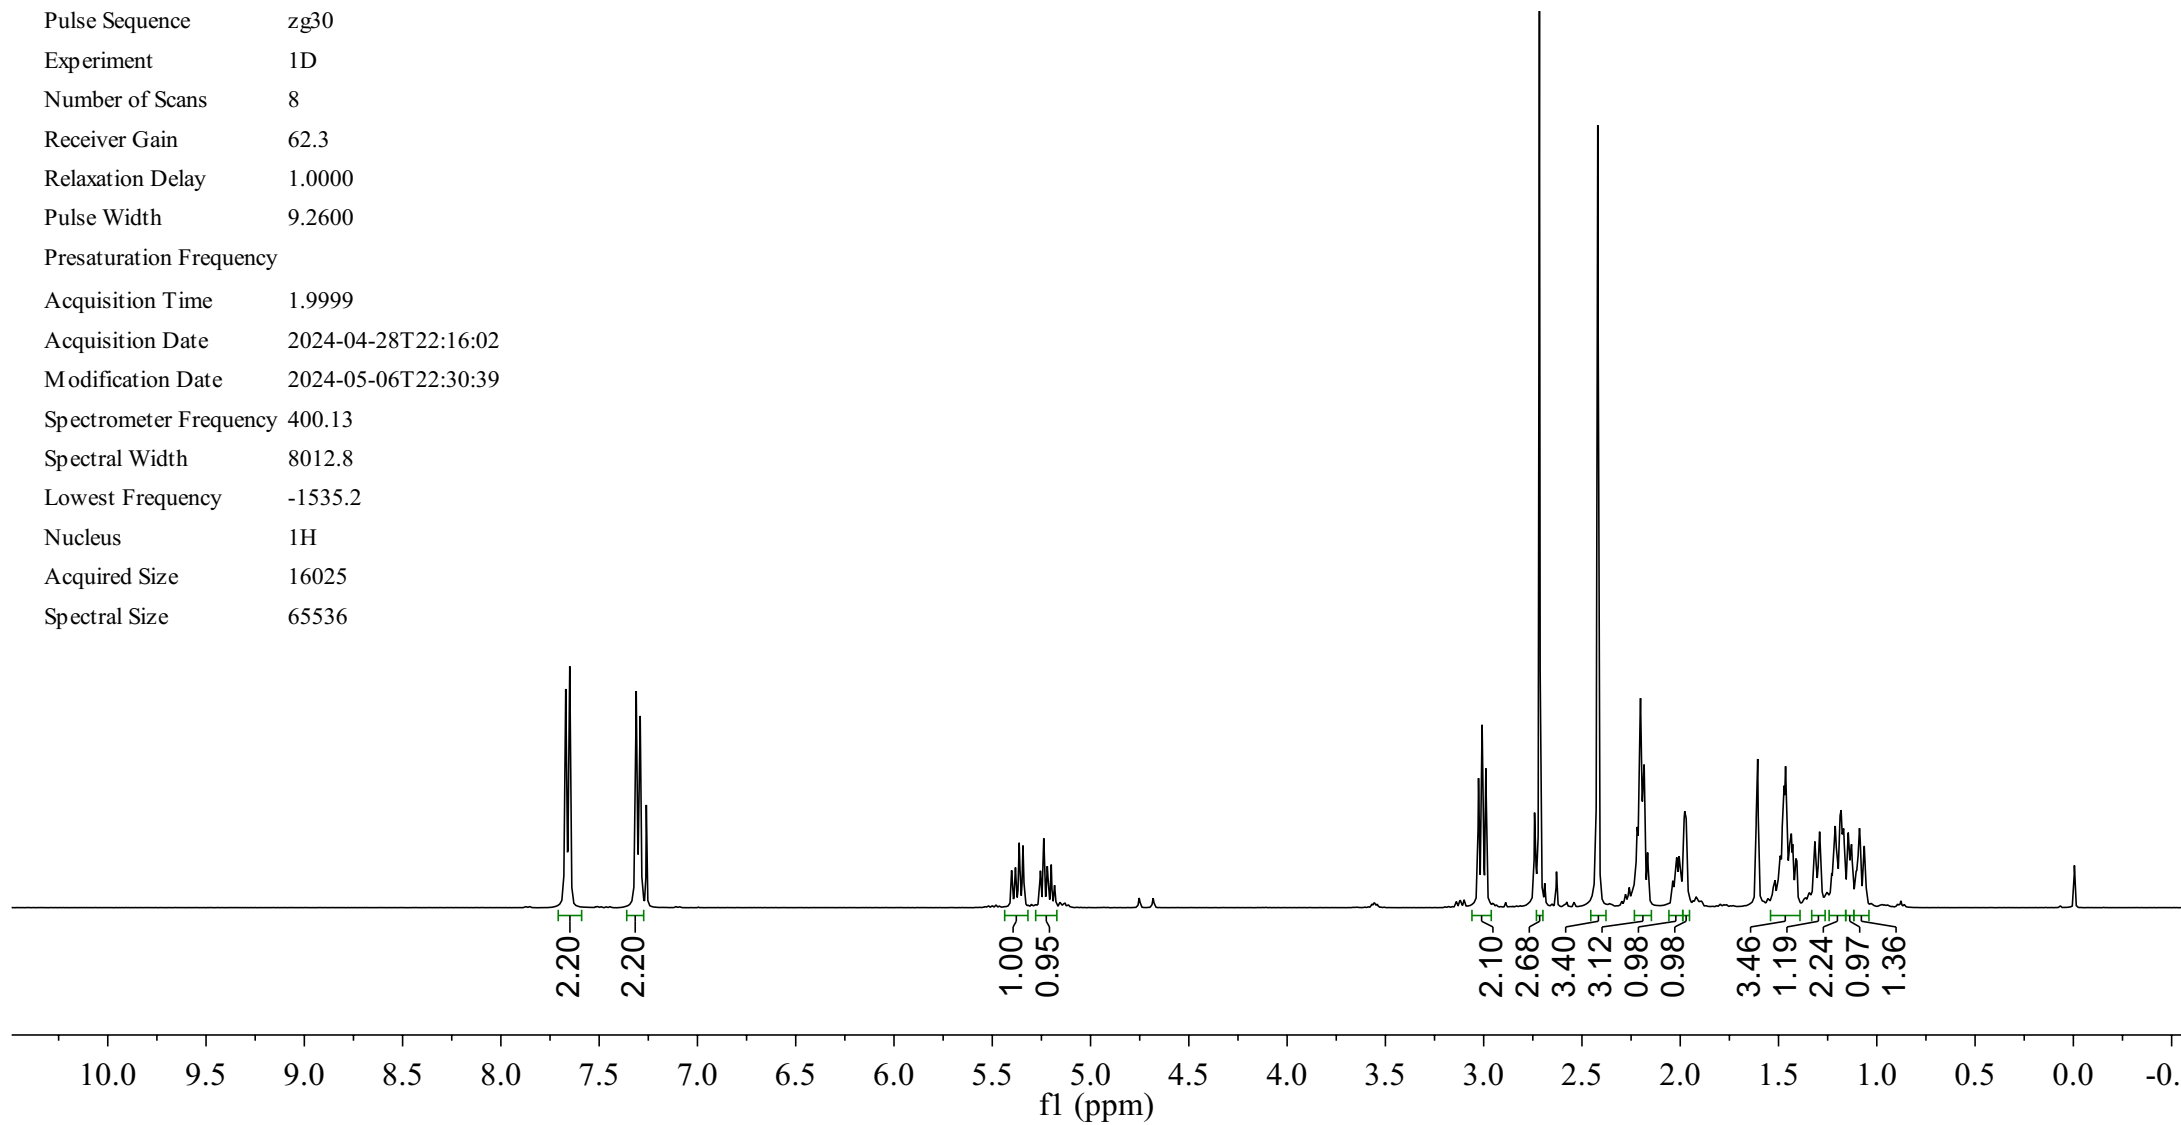

s15

| Parameter               | Value                     |
|-------------------------|---------------------------|
| Title                   | YM-20240422-4-iso. 5. fid |
| Comment                 | s15                       |
| Origin                  | Bruker BioSpin GmbH       |
| Owner                   | PC                        |
| Site                    |                           |
| Instrument              | spect                     |
| Solvent                 | CDC13                     |
| Temperature             | 297.7                     |
| Pulse Sequence          | zgpg30                    |
| Experiment              | 1D                        |
| Number of Scans         | 48                        |
| Receiver Gain           | 196.4                     |
| Relaxation Delay        | 2.0000                    |
| Pulse Width             | 10.2200                   |
| Presaturation Frequency |                           |
| Acquisition Time        | 1.2976                    |
| Acquisition Date        | 2024-04-28T22:18:47       |
| Modification Date       | 2024-05-06T22:30:39       |
| Spectrometer Frequency  | 100.62                    |
| Spectral Width          | 25252.5                   |
| Lowest Frequency        | -540.0                    |
| Nucleus                 | 13C                       |
| Acquired Size           | 32768                     |
| Spectral Size           | 65536                     |

~143.3  
~139.0  
~135.0  
~129.7  
~127.5  
~123.2

50.3  
45.0  
42.7  
37.9  
36.7  
35.7  
34.9  
31.4  
29.8  
29.1  
21.6

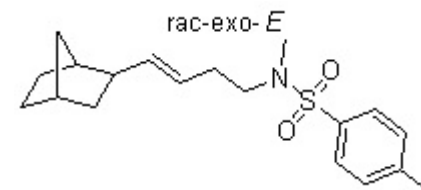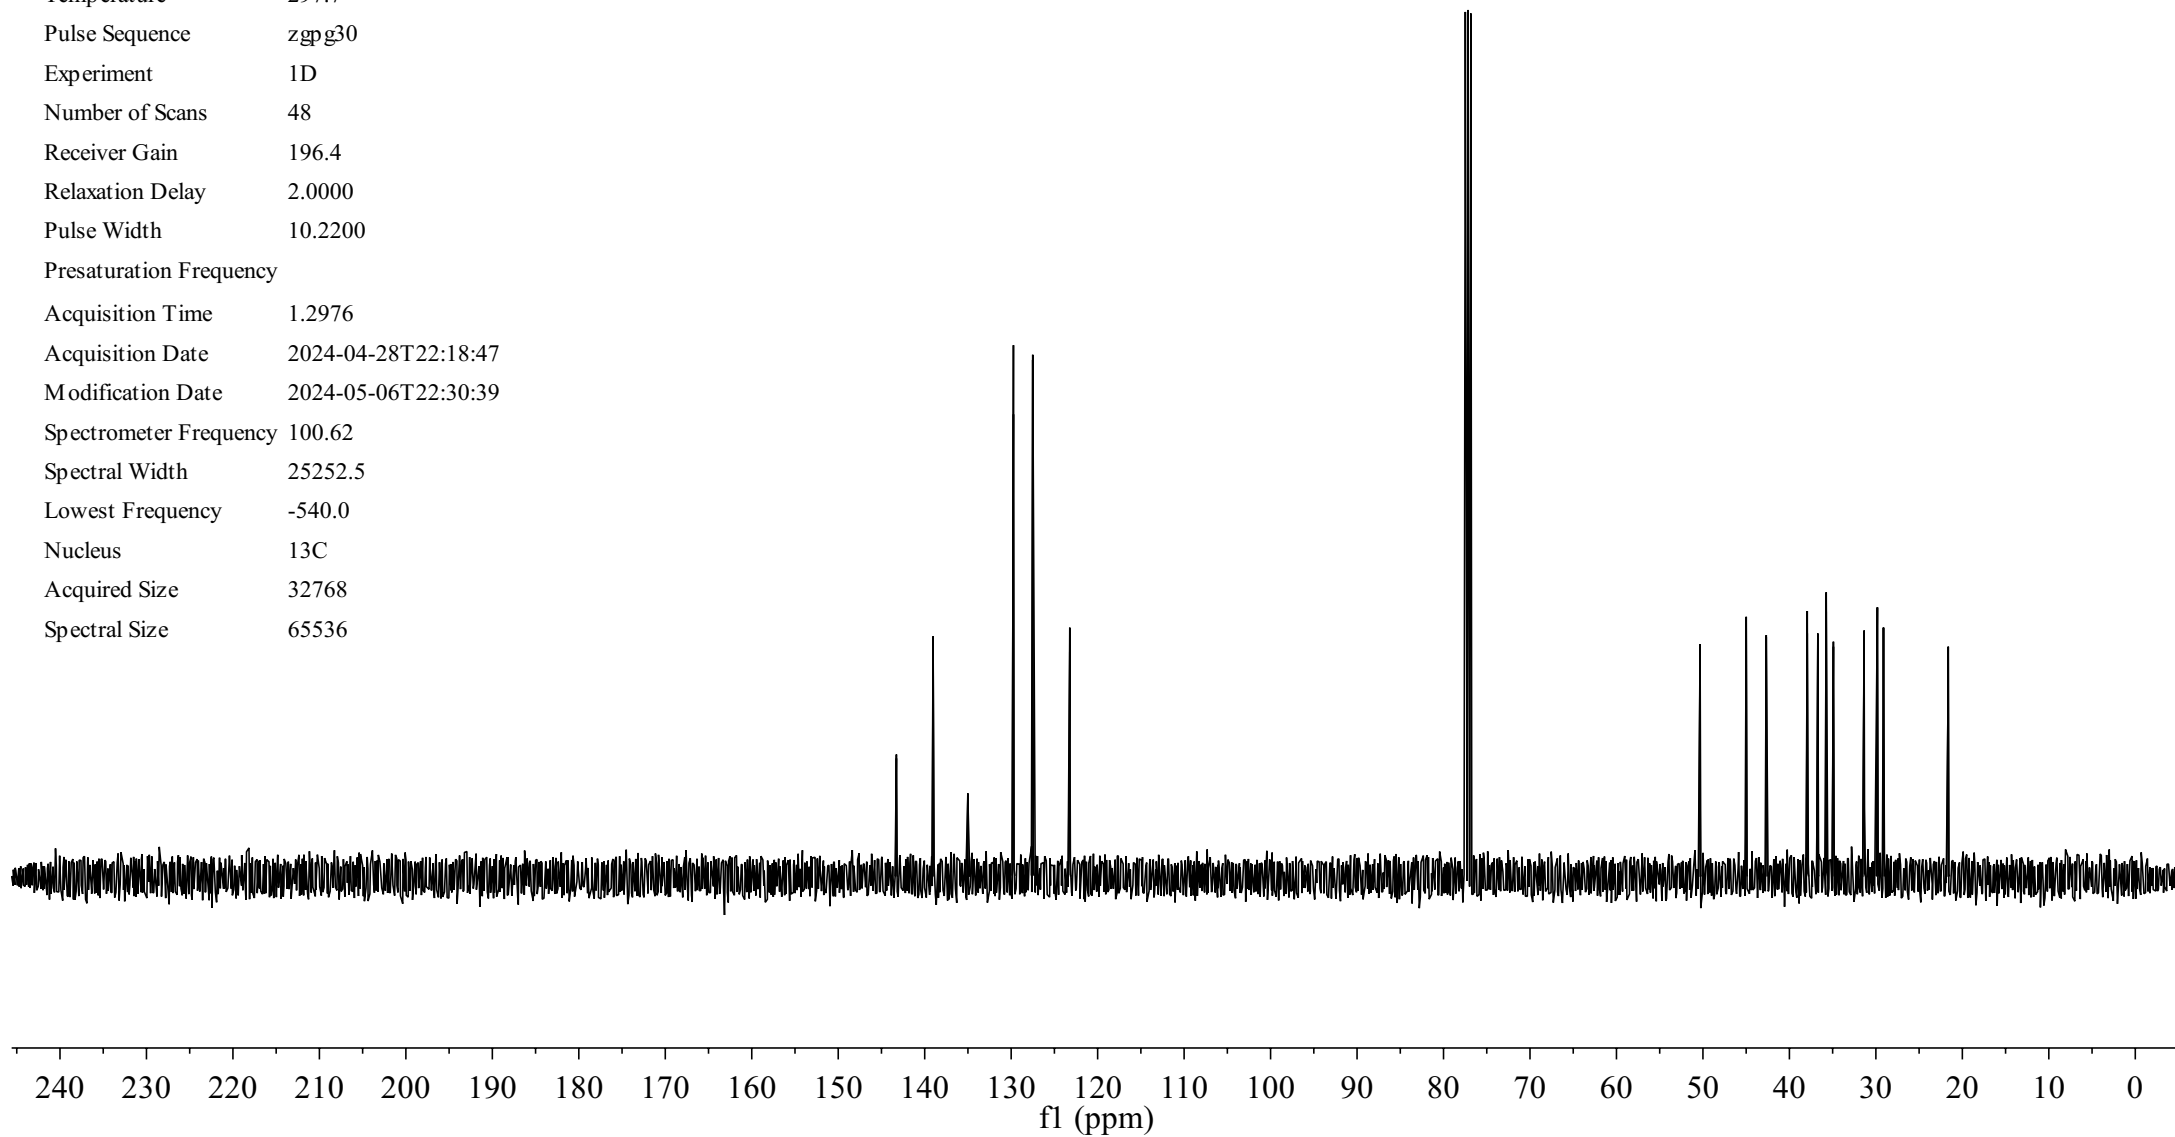



YM-20230602-1-iso.3.fid

| Parameter               | Value                   |
|-------------------------|-------------------------|
| Title                   | YM-20230602-1-iso.3.fid |
| Comment                 | s3-5                    |
| Origin                  | Bruker BioSpin GmbH     |
| Owner                   | nmr                     |
| Site                    |                         |
| Instrument              | spect                   |
| Solvent                 | CDC13                   |
| Temperature             | 296.1                   |
| Pulse Sequence          | zg30                    |
| Experiment              | 1D                      |
| Number of Scans         | 8                       |
| Receiver Gain           | 95.3                    |
| Relaxation Delay        | 1.0000                  |
| Pulse Width             | 11.3200                 |
| Presaturation Frequency |                         |
| Acquisition Time        | 3.2768                  |
| Acquisition Date        | 2023-06-05T11:32:28     |
| Modification Date       | 2023-06-05T14:41:01     |
| Spectrometer Frequency  | 500.13                  |
| Spectral Width          | 10000.0                 |
| Lowest Frequency        | -1924.5                 |
| Nucleus                 | 1H                      |
| Acquired Size           | 32768                   |
| Spectral Size           | 65536                   |

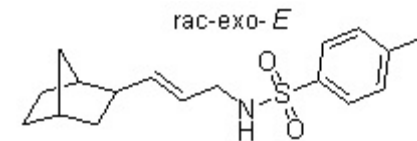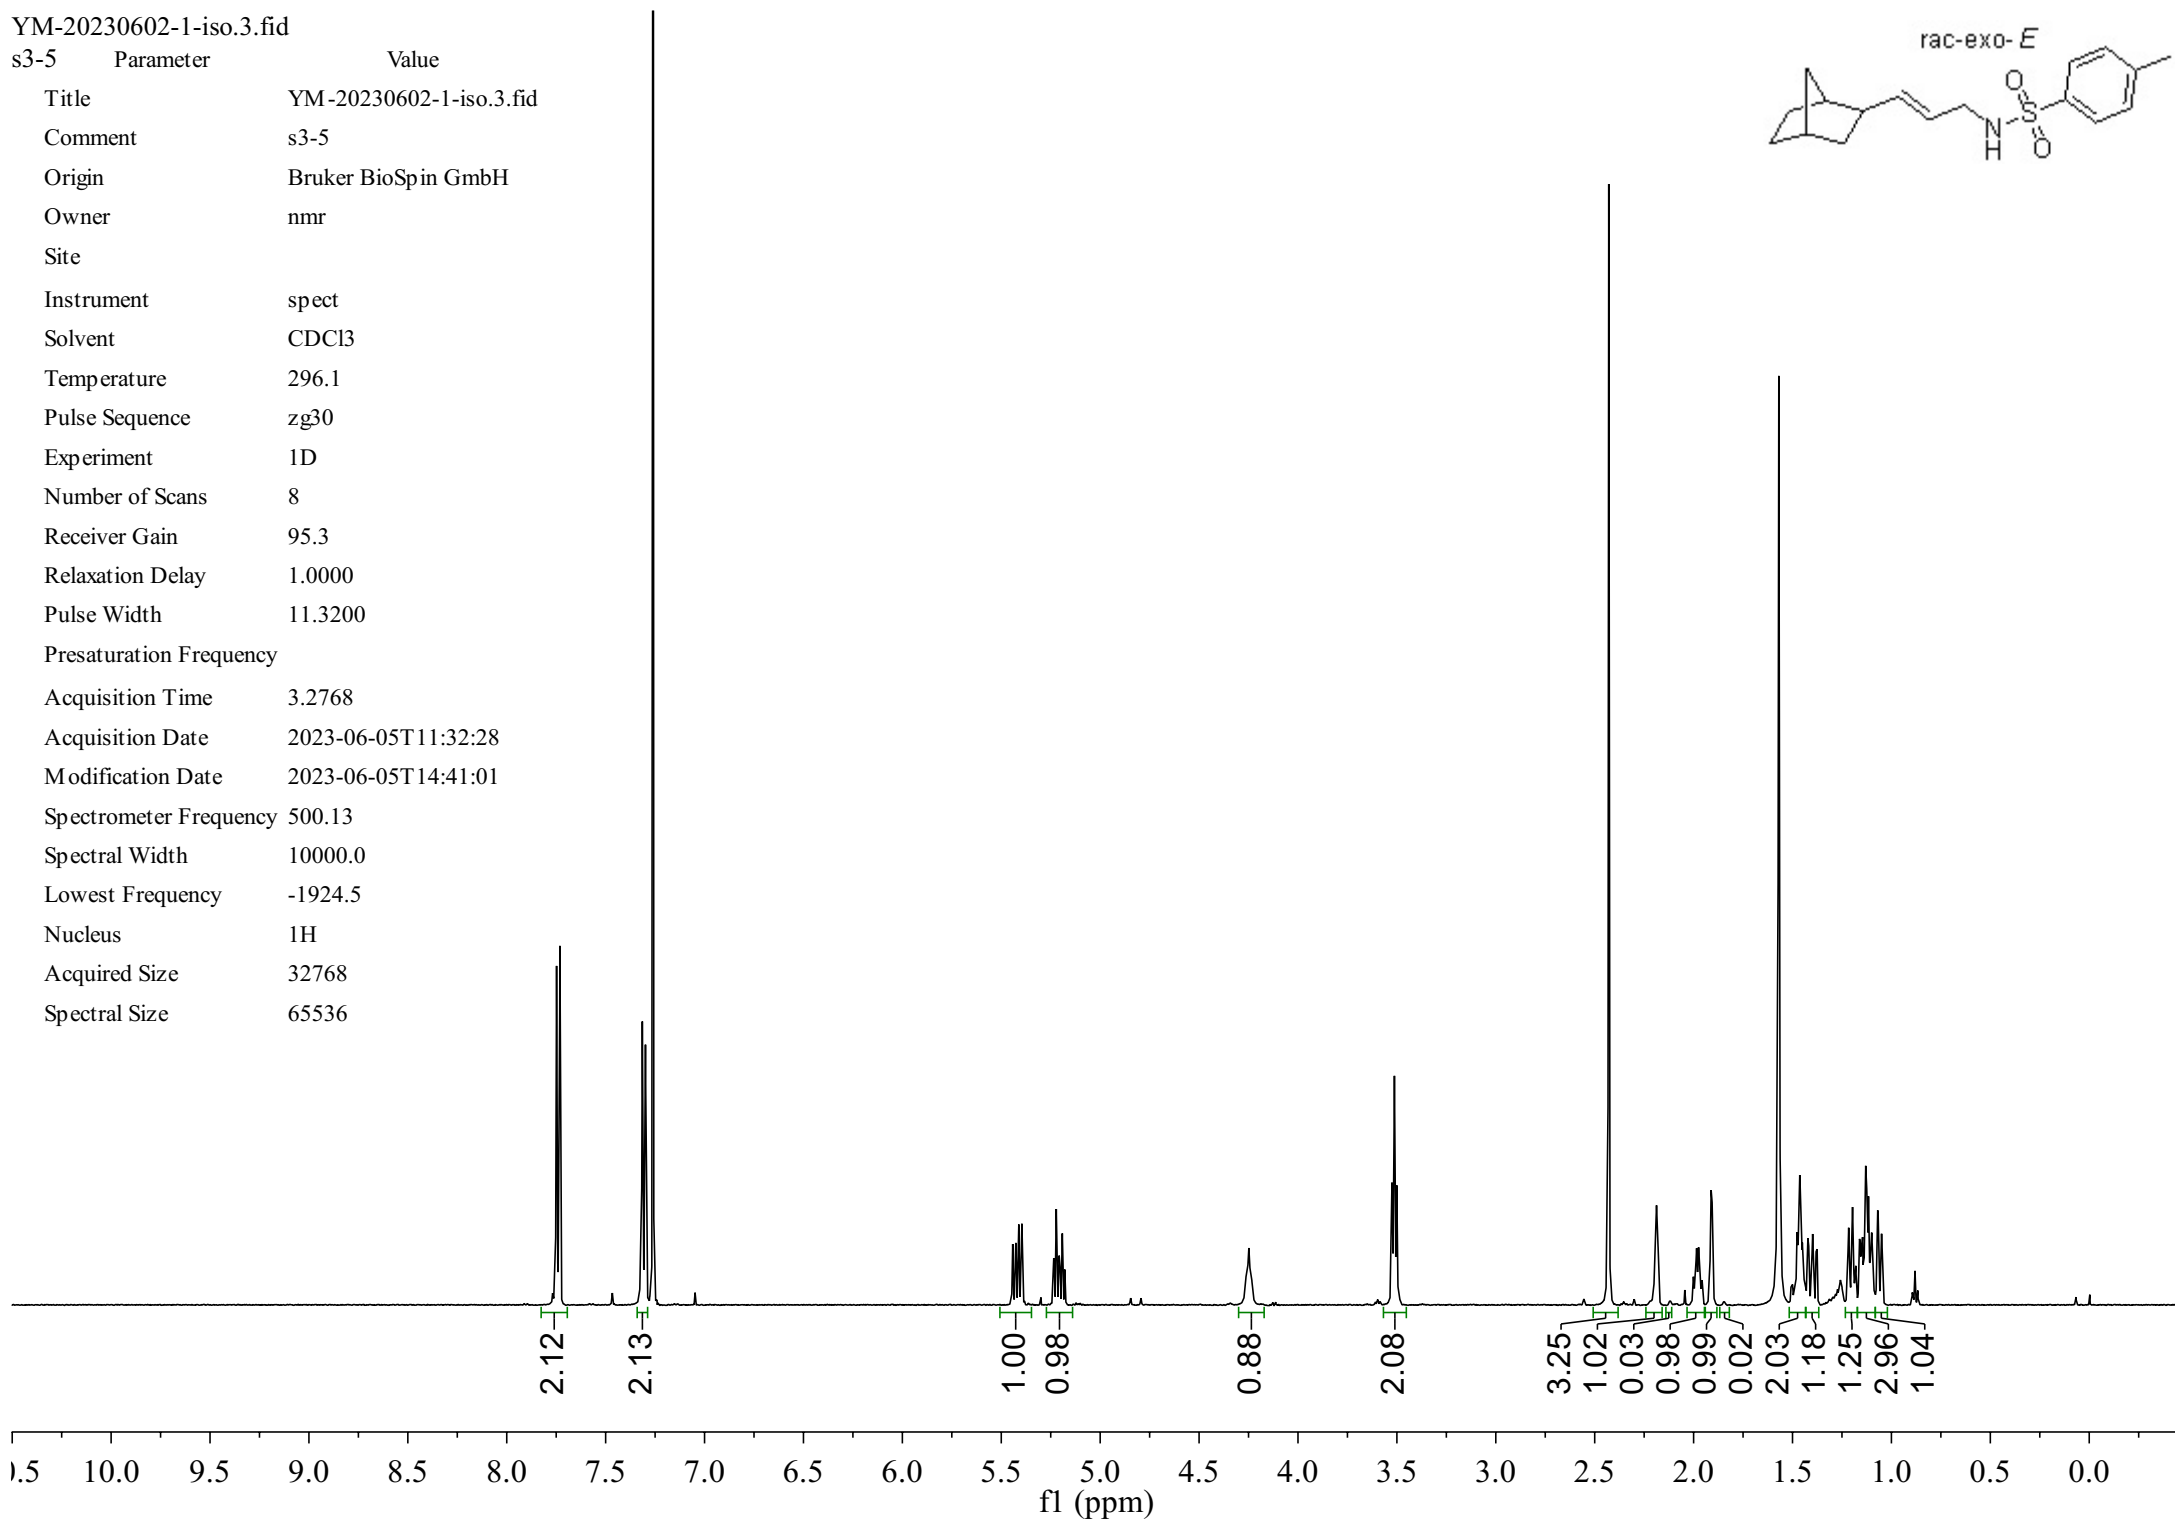

YM-20230602-1-iso.4.fid

| Parameter               | Value                   |
|-------------------------|-------------------------|
| Title                   | YM-20230602-1-iso.4.fid |
| Comment                 | s3-5                    |
| Origin                  | Bruker BioSpin GmbH     |
| Owner                   | nmr                     |
| Site                    |                         |
| Instrument              | spect                   |
| Solvent                 | CDC13                   |
| Temperature             | 296.2                   |
| Pulse Sequence          | zgpg30                  |
| Experiment              | 1D                      |
| Number of Scans         | 86                      |
| Receiver Gain           | 193.1                   |
| Relaxation Delay        | 2.0000                  |
| Pulse Width             | 9.9400                  |
| Presaturation Frequency |                         |
| Acquisition Time        | 1.1010                  |
| Acquisition Date        | 2023-06-05T11:37:23     |
| Modification Date       | 2023-06-05T14:41:01     |
| Spectrometer Frequency  | 125.77                  |
| Spectral Width          | 29761.9                 |
| Lowest Frequency        | -2289.0                 |
| Nucleus                 | 13C                     |
| Acquired Size           | 32768                   |
| Spectral Size           | 65536                   |

~143.6  
~140.5  
~137.3  
~129.8  
~127.3  
~121.9

45.6  
44.5  
42.4  
37.6  
36.7  
35.7  
29.7  
29.0  
21.7

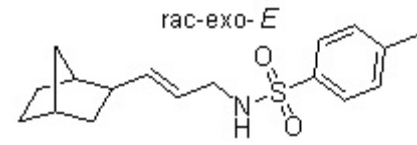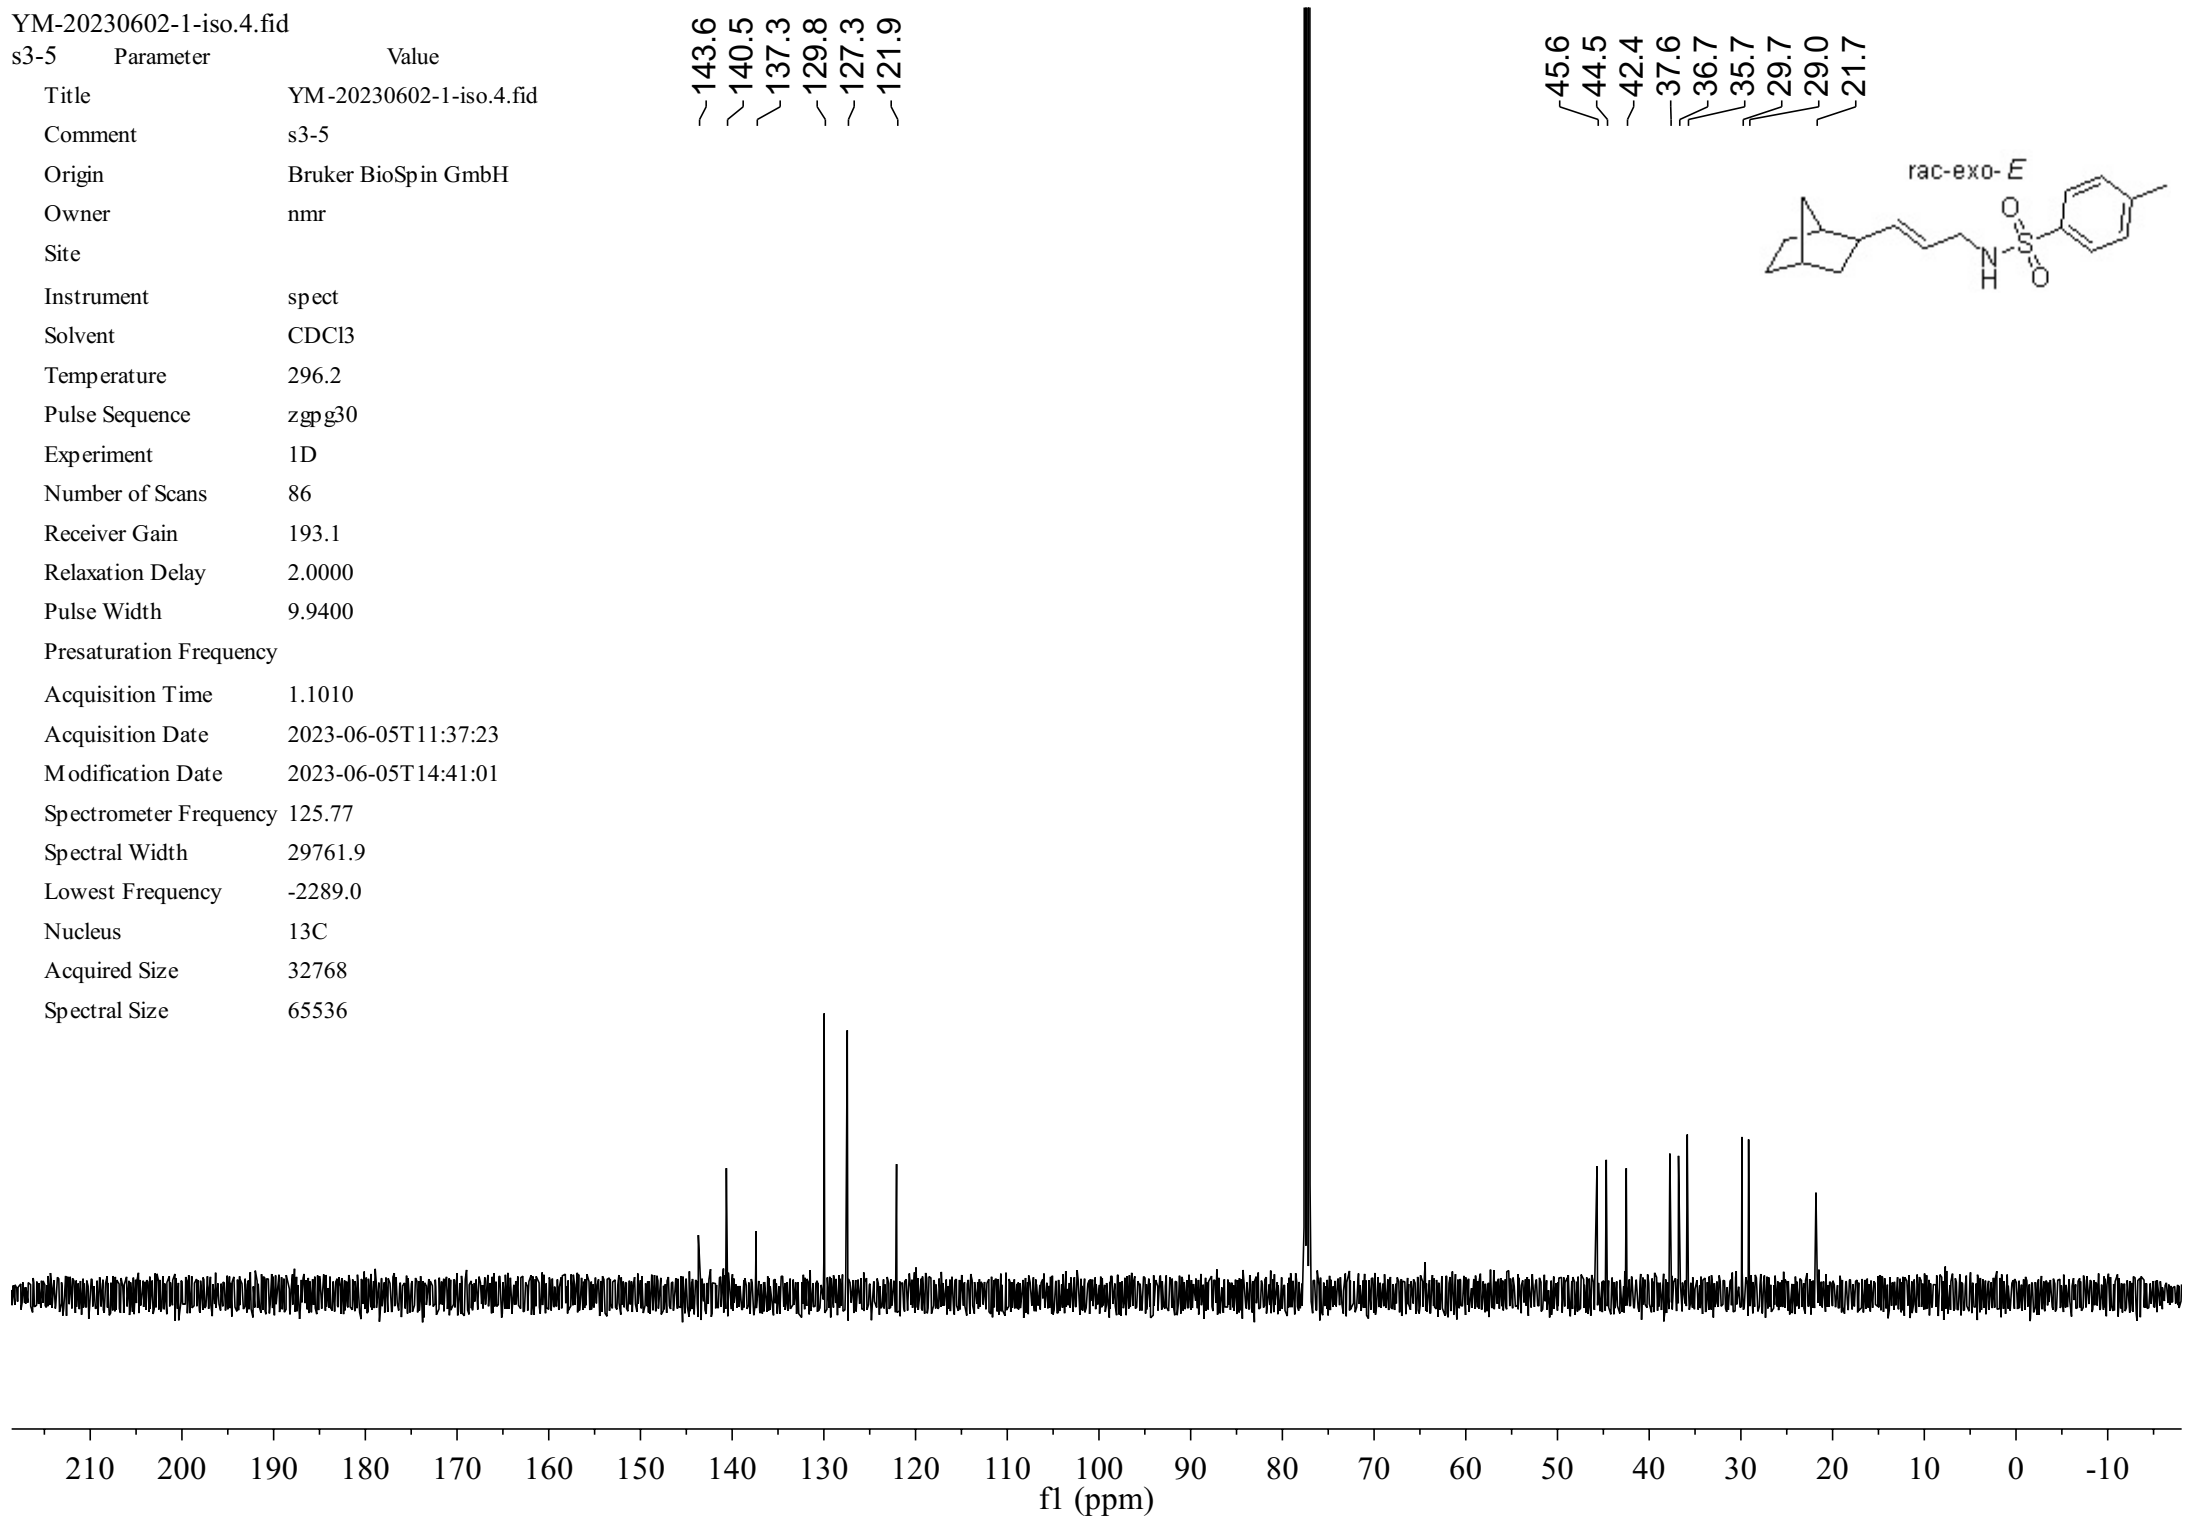

YM-20240425-2.11.fid

| (2) | Parameter               | Value                |
|-----|-------------------------|----------------------|
|     | Title                   | YM-20240425-2.11.fid |
|     | Comment                 | (2)                  |
|     | Origin                  | Bruker BioSpin GmbH  |
|     | Owner                   | nmrsu                |
|     | Site                    |                      |
|     | Instrument              | Avance NEO 400       |
|     | Solvent                 | CDC13                |
|     | Temperature             | 298.0                |
|     | Pulse Sequence          | zg30                 |
|     | Experiment              | 1D                   |
|     | Number of Scans         | 16                   |
|     | Receiver Gain           | 101.0                |
|     | Relaxation Delay        | 1.0000               |
|     | Pulse Width             | 8.0000               |
|     | Presaturation Frequency |                      |
|     | Acquisition Time        | 3.9977               |
|     | Acquisition Date        | 2024-04-26T17:46:13  |
|     | Modification Date       | 2024-04-26T19:09:52  |
|     | Spectrometer Frequency  | 400.14               |
|     | Spectral Width          | 8196.7               |
|     | Lowest Frequency        | -1637.1              |
|     | Nucleus                 | 1H                   |
|     | Acquired Size           | 32768                |
|     | Spectral Size           | 65536                |

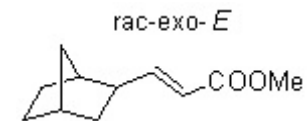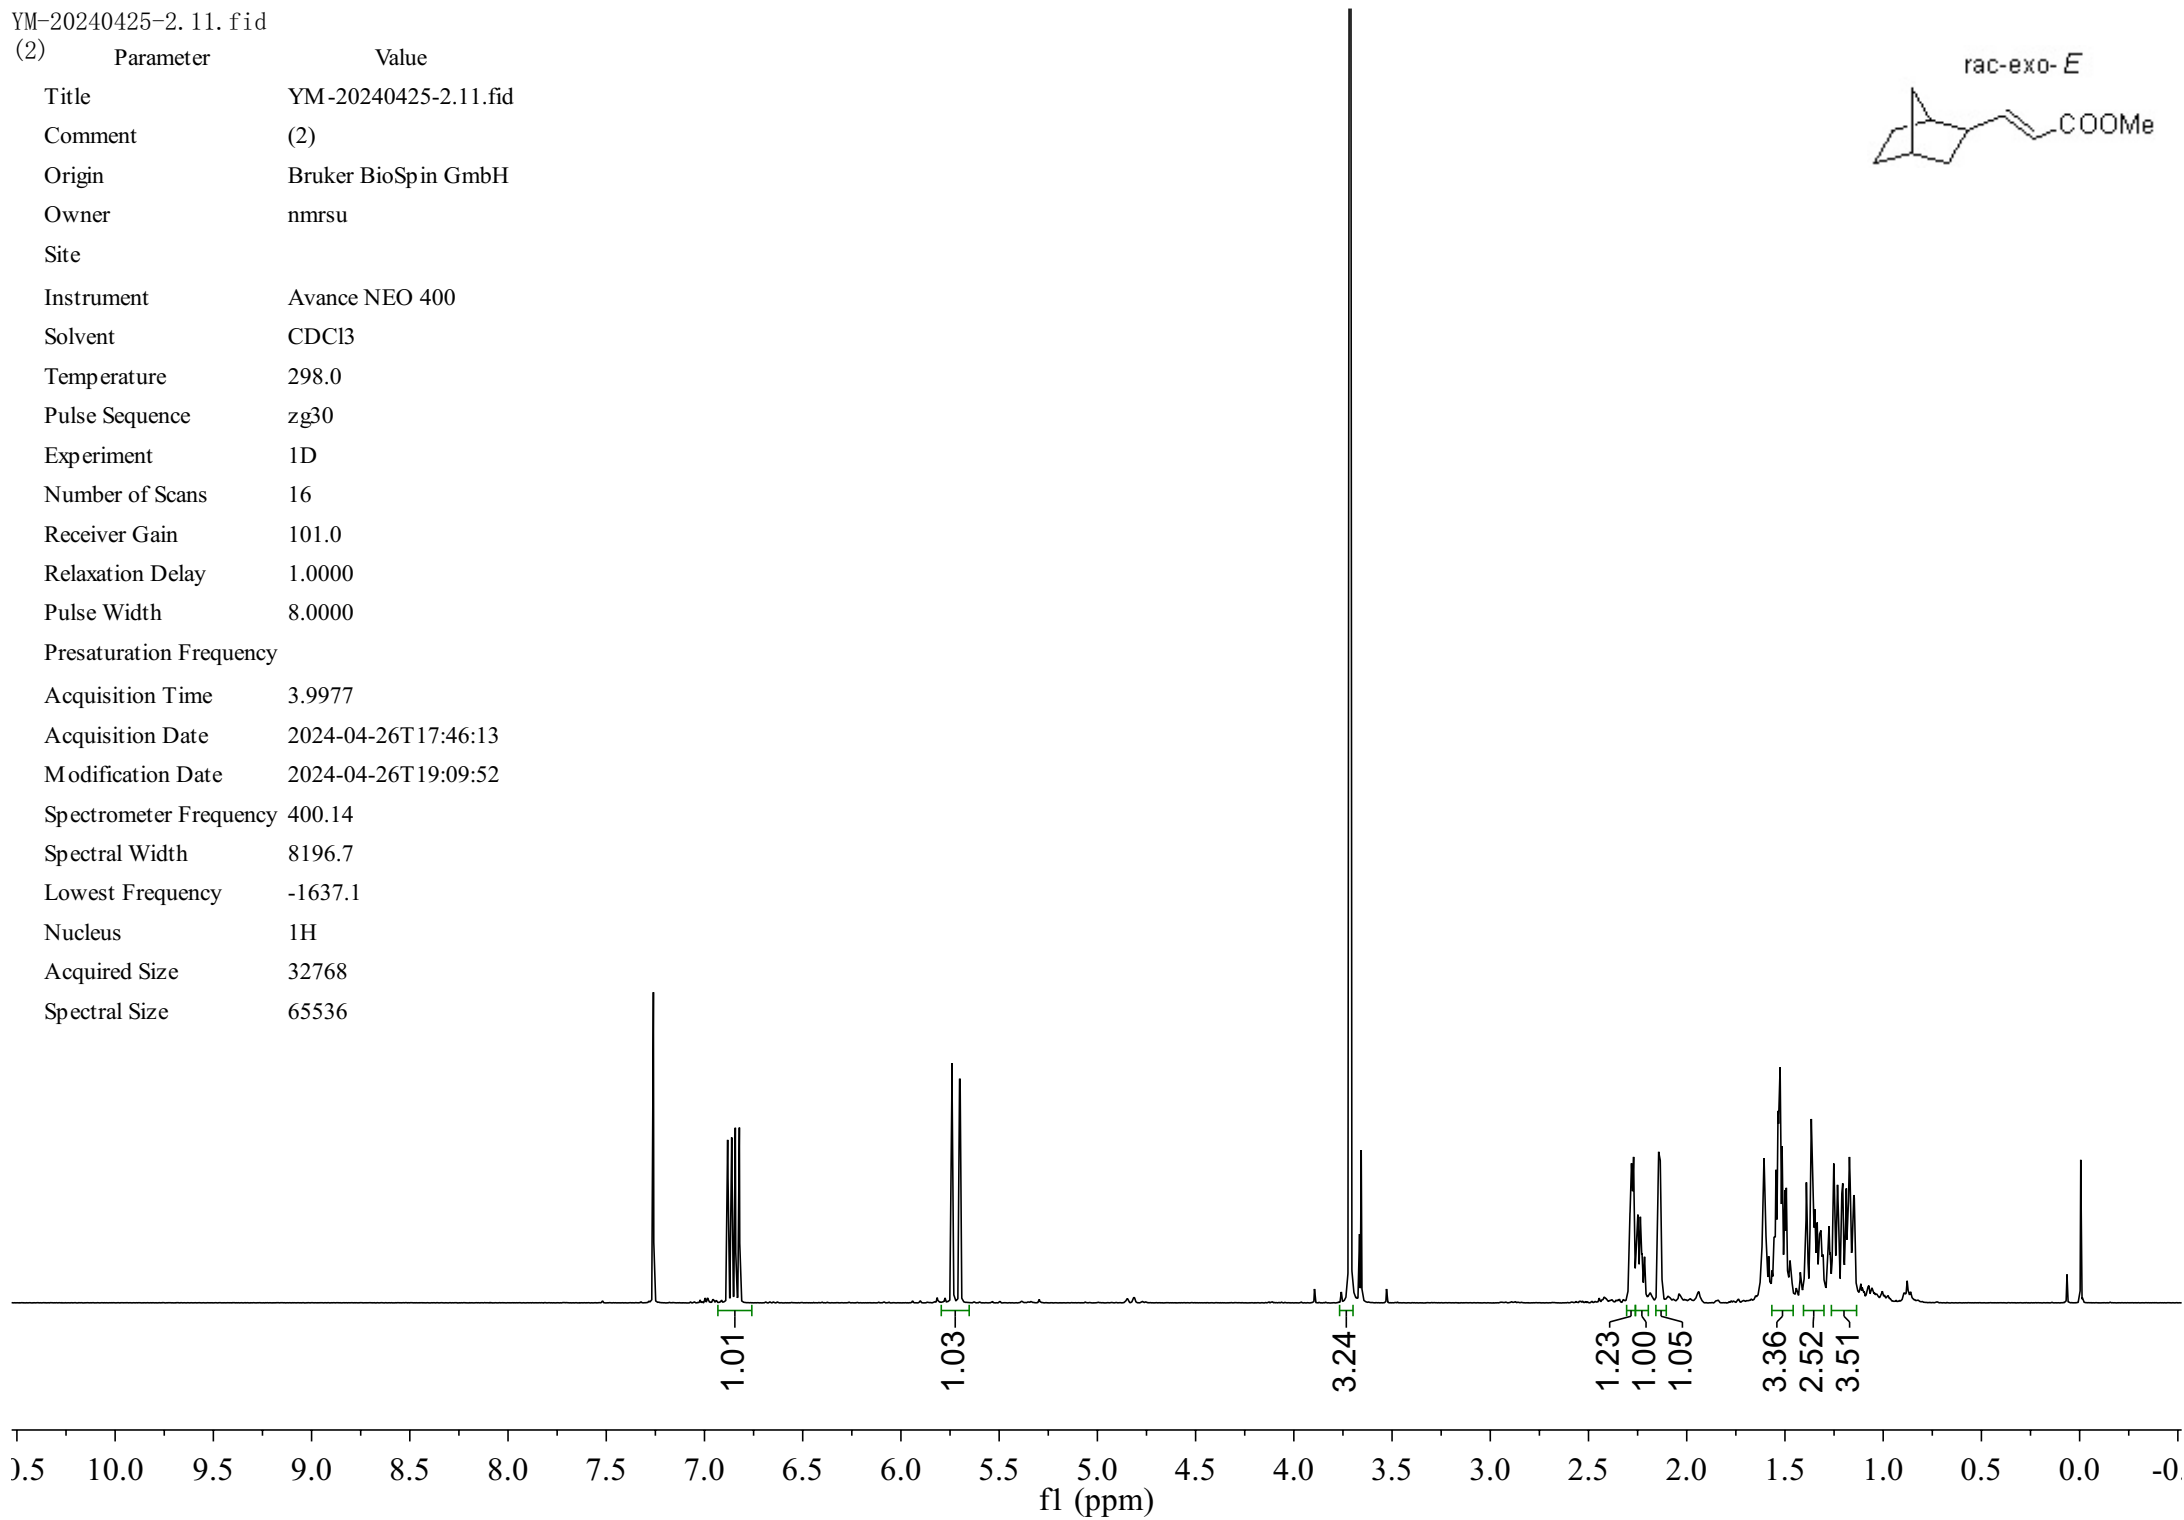

YM-20240425-2.12.fid

(2) E

—167.7

—154.3

—118.4

51.5  
44.8  
42.0  
37.1  
36.7  
35.9  
29.8  
29.0

rac-exo-*E*

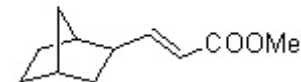

| Parameter               | Value                |
|-------------------------|----------------------|
| Title                   | YM-20240425-2.12.fid |
| Comment                 | (2) E                |
| Origin                  | Bruker BioSpin GmbH  |
| Owner                   | nmr                  |
| Site                    |                      |
| Instrument              | spect                |
| Solvent                 | CDC13                |
| Temperature             | 296.1                |
| Pulse Sequence          | zgpg30               |
| Experiment              | 1D                   |
| Number of Scans         | 32                   |
| Receiver Gain           | 193.1                |
| Relaxation Delay        | 2.0000               |
| Pulse Width             | 9.9400               |
| Presaturation Frequency |                      |
| Acquisition Time        | 1.1010               |
| Acquisition Date        | 2024-04-26T21:14:33  |
| Modification Date       | 2024-04-26T22:44:06  |
| Spectrometer Frequency  | 125.77               |
| Spectral Width          | 29761.9              |
| Lowest Frequency        | -2289.4              |
| Nucleus                 | 13C                  |
| Acquired Size           | 32768                |
| Spectral Size           | 65536                |

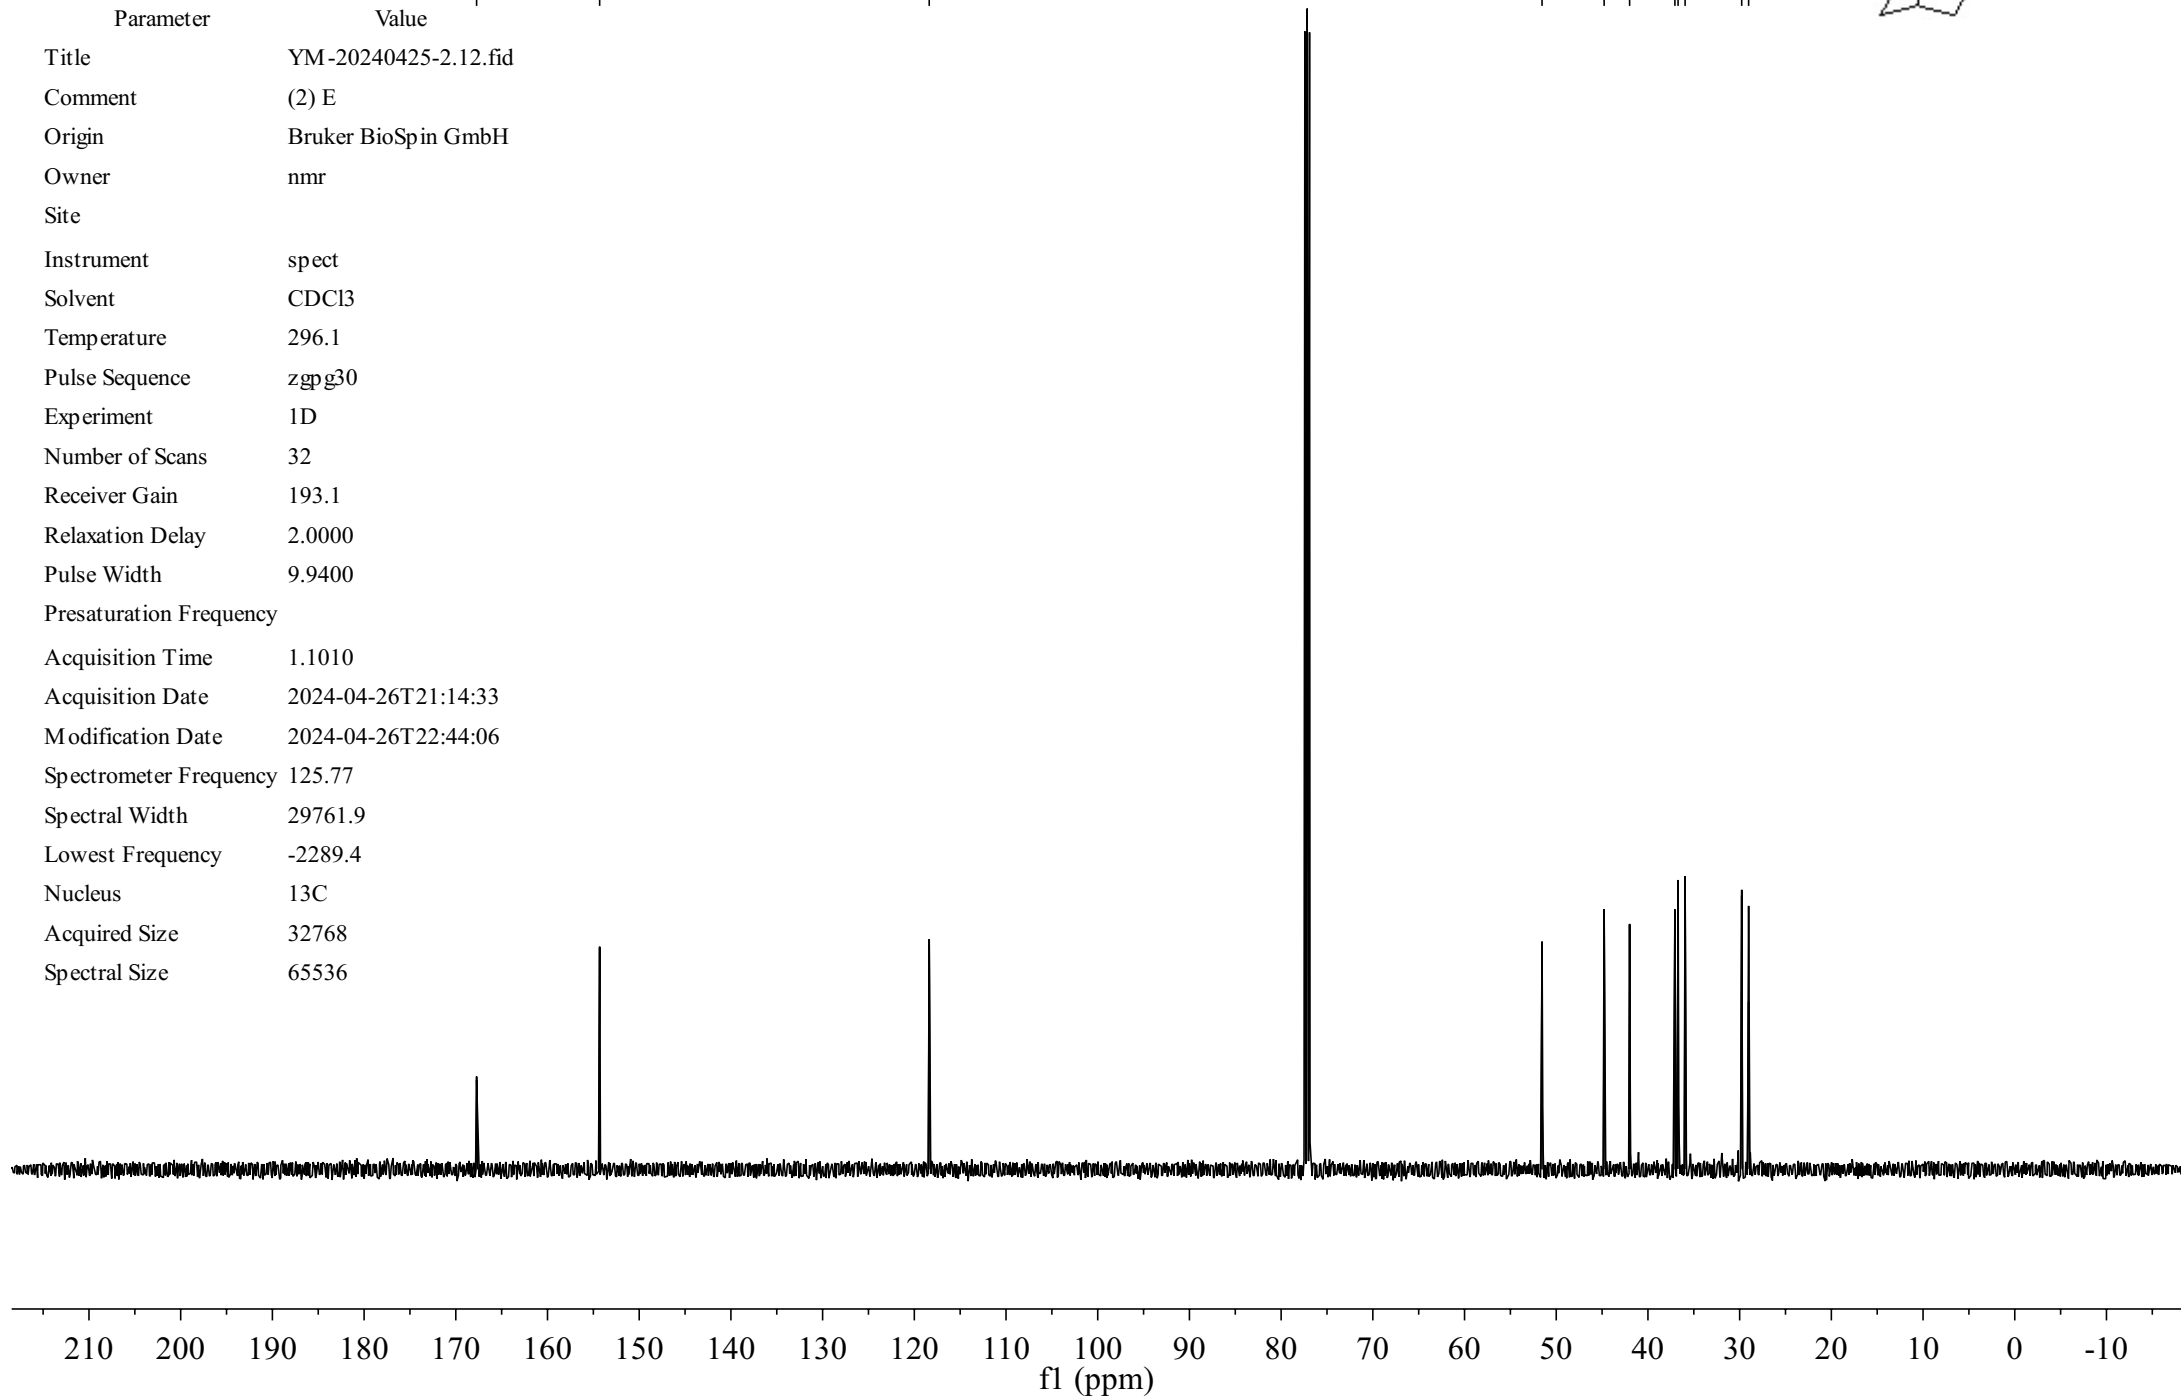

| (1) Parameter           | Value               |
|-------------------------|---------------------|
| Title                   | YM-20240425-2.1.fid |
| Comment                 | (1)                 |
| Origin                  | Bruker BioSpin GmbH |
| Owner                   | nmrsu               |
| Site                    |                     |
| Instrument              | Avance NEO 400      |
| Solvent                 | CDC13               |
| Temperature             | 298.1               |
| Pulse Sequence          | zg30                |
| Experiment              | 1D                  |
| Number of Scans         | 16                  |
| Receiver Gain           | 101.0               |
| Relaxation Delay        | 1.0000              |
| Pulse Width             | 8.0000              |
| Presaturation Frequency |                     |
| Acquisition Time        | 3.9977              |
| Acquisition Date        | 2024-04-26T17:41:16 |
| Modification Date       | 2024-04-26T19:09:52 |
| Spectrometer Frequency  | 400.14              |
| Spectral Width          | 8196.7              |
| Lowest Frequency        | -1637.1             |
| Nucleus                 | <sup>1</sup> H      |
| Acquired Size           | 32768               |
| Spectral Size           | 65536               |

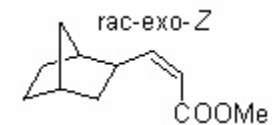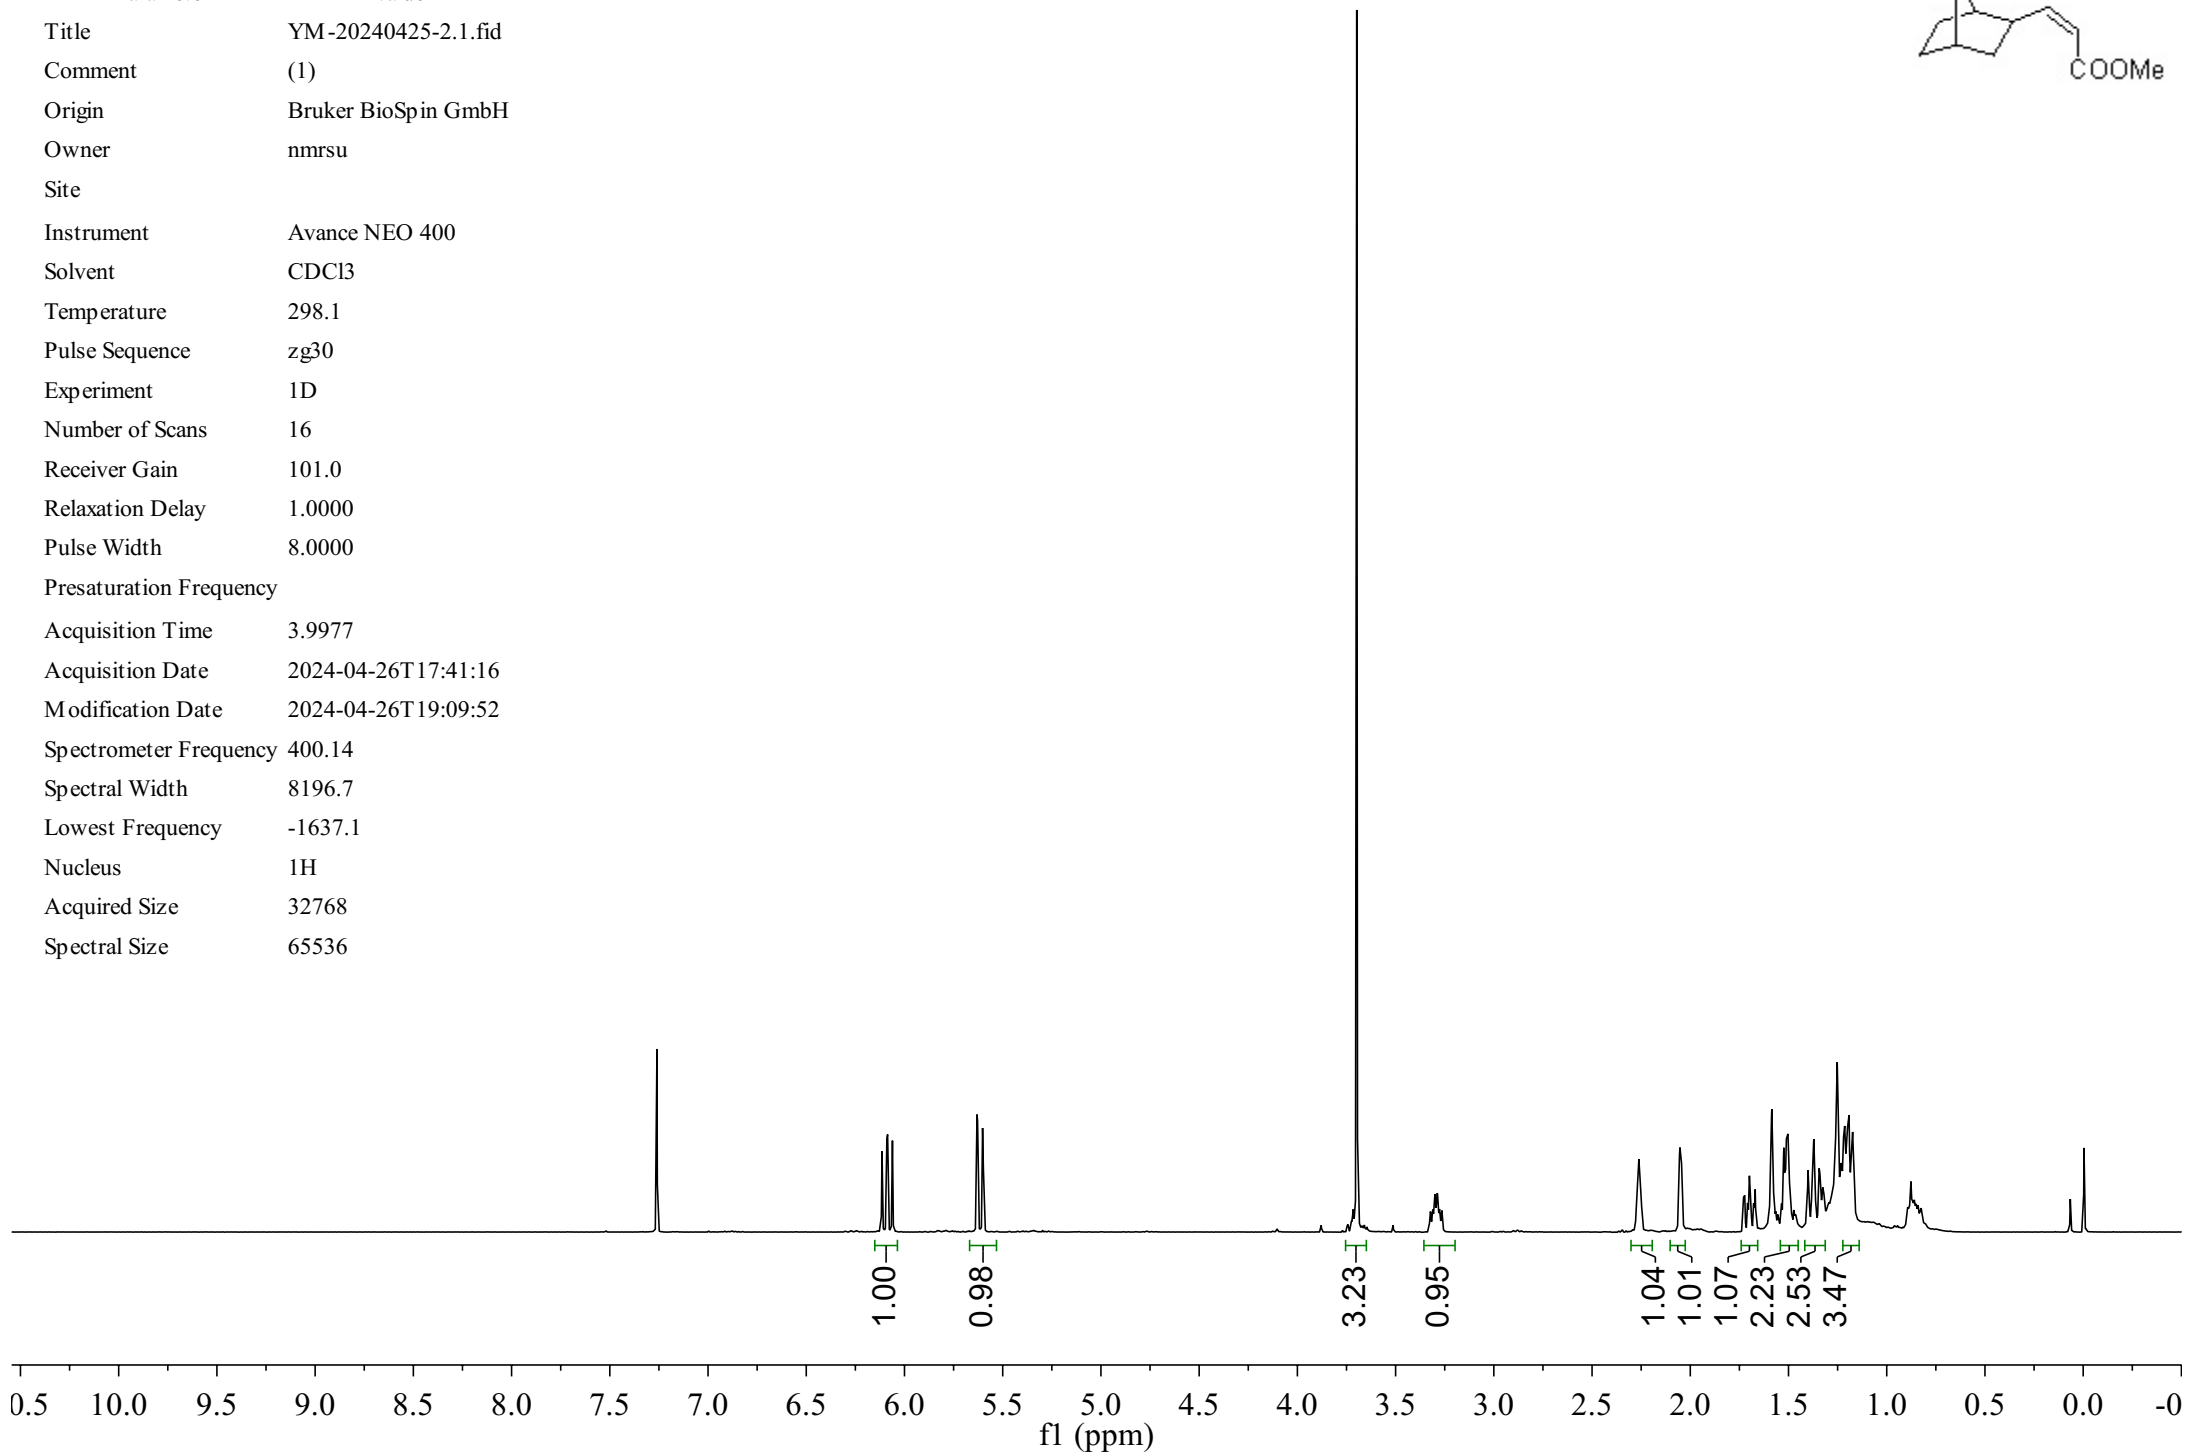

YM-20240425-2.2.fid

(1) Z

—167.0

—156.4

—116.5

51.1  
43.1  
41.0  
38.9  
36.6  
36.2  
29.7  
28.9

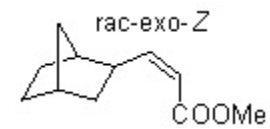

| Parameter               | Value               |
|-------------------------|---------------------|
| Title                   | YM-20240425-2.2.fid |
| Comment                 | (1) Z               |
| Origin                  | Bruker BioSpin GmbH |
| Owner                   | nmr                 |
| Site                    |                     |
| Instrument              | spect               |
| Solvent                 | CDC13               |
| Temperature             | 296.2               |
| Pulse Sequence          | zgpg30              |
| Experiment              | 1D                  |
| Number of Scans         | 32                  |
| Receiver Gain           | 193.1               |
| Relaxation Delay        | 2.0000              |
| Pulse Width             | 9.9400              |
| Presaturation Frequency |                     |
| Acquisition Time        | 1.1010              |
| Acquisition Date        | 2024-04-26T21:10:24 |
| Modification Date       | 2024-04-26T22:44:07 |
| Spectrometer Frequency  | 125.77              |
| Spectral Width          | 29761.9             |
| Lowest Frequency        | -2289.2             |
| Nucleus                 | 13C                 |
| Acquired Size           | 32768               |
| Spectral Size           | 65536               |

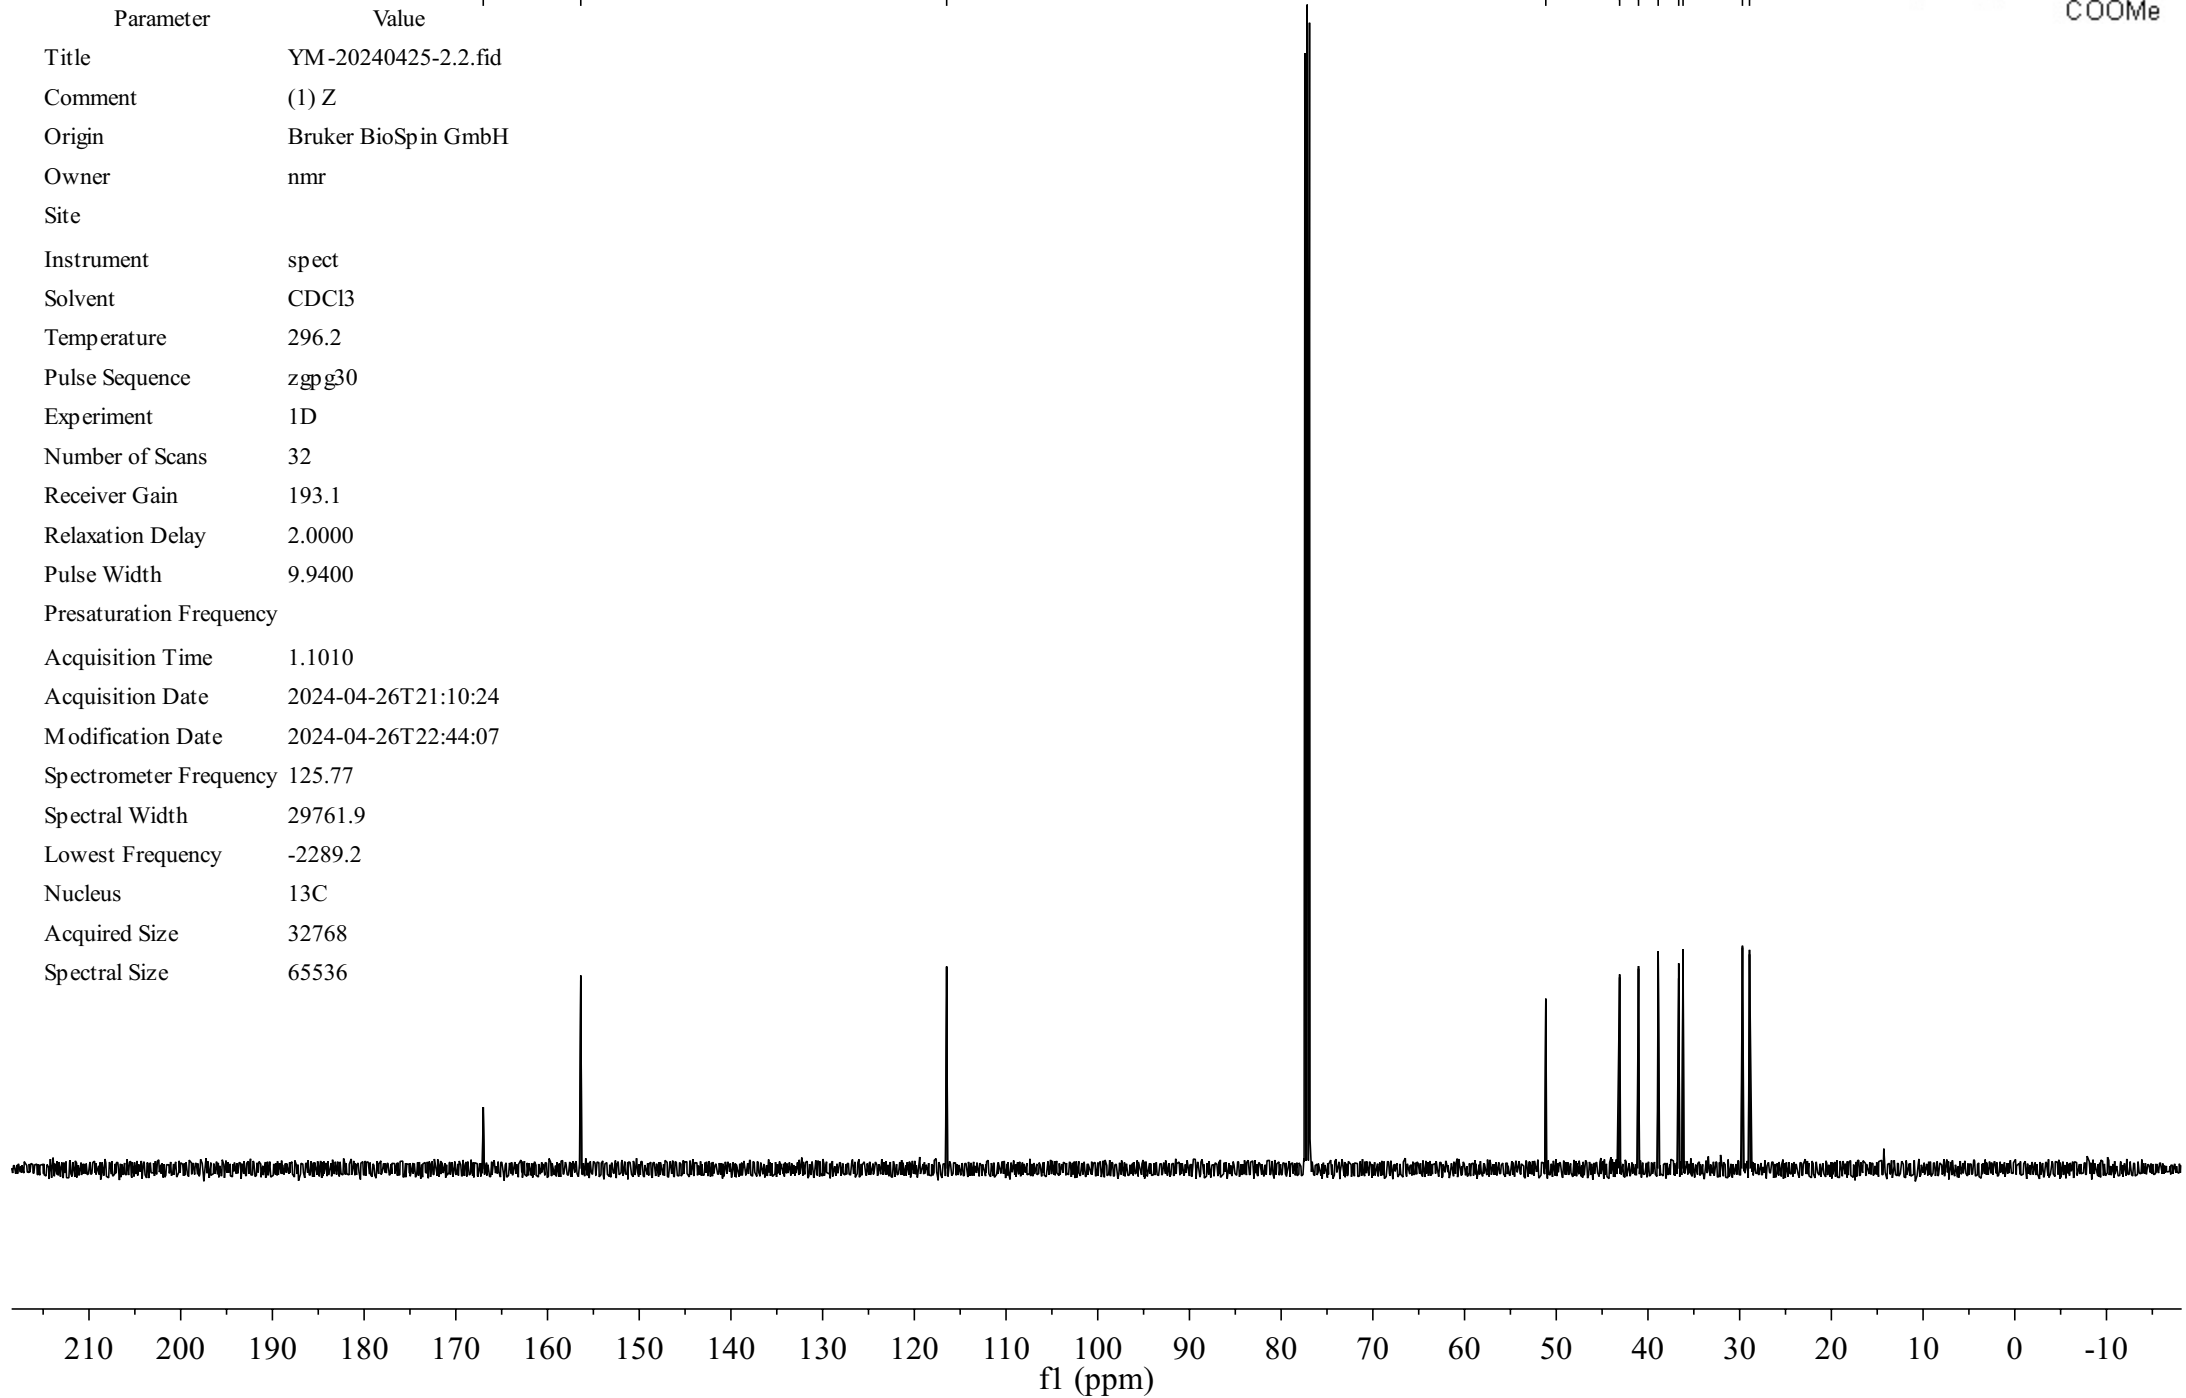

cwh-20210223.1.fid

| Parameter               | Value               |
|-------------------------|---------------------|
| Title                   | cwh-20210223.1.fid  |
| Comment                 |                     |
| Origin                  | Bruker BioSpin GmbH |
| Owner                   | nmr                 |
| Site                    |                     |
| Instrument              | spect               |
| Solvent                 | CDC13               |
| Temperature             | 296.1               |
| Pulse Sequence          | zg30                |
| Experiment              | 1D                  |
| Number of Scans         | 8                   |
| Receiver Gain           | 108.2               |
| Relaxation Delay        | 1.0000              |
| Pulse Width             | 11.3200             |
| Presaturation Frequency |                     |
| Acquisition Time        | 3.2768              |
| Acquisition Date        | 2021-02-23T11:15:00 |
| Modification Date       | 2021-02-23T11:15:00 |
| Spectrometer Frequency  | 500.13              |
| Spectral Width          | 10000.0             |
| Lowest Frequency        | -1923.6             |
| Nucleus                 | 1H                  |
| Acquired Size           | 32768               |
| Spectral Size           | 65536               |

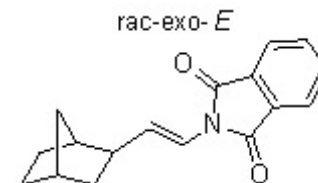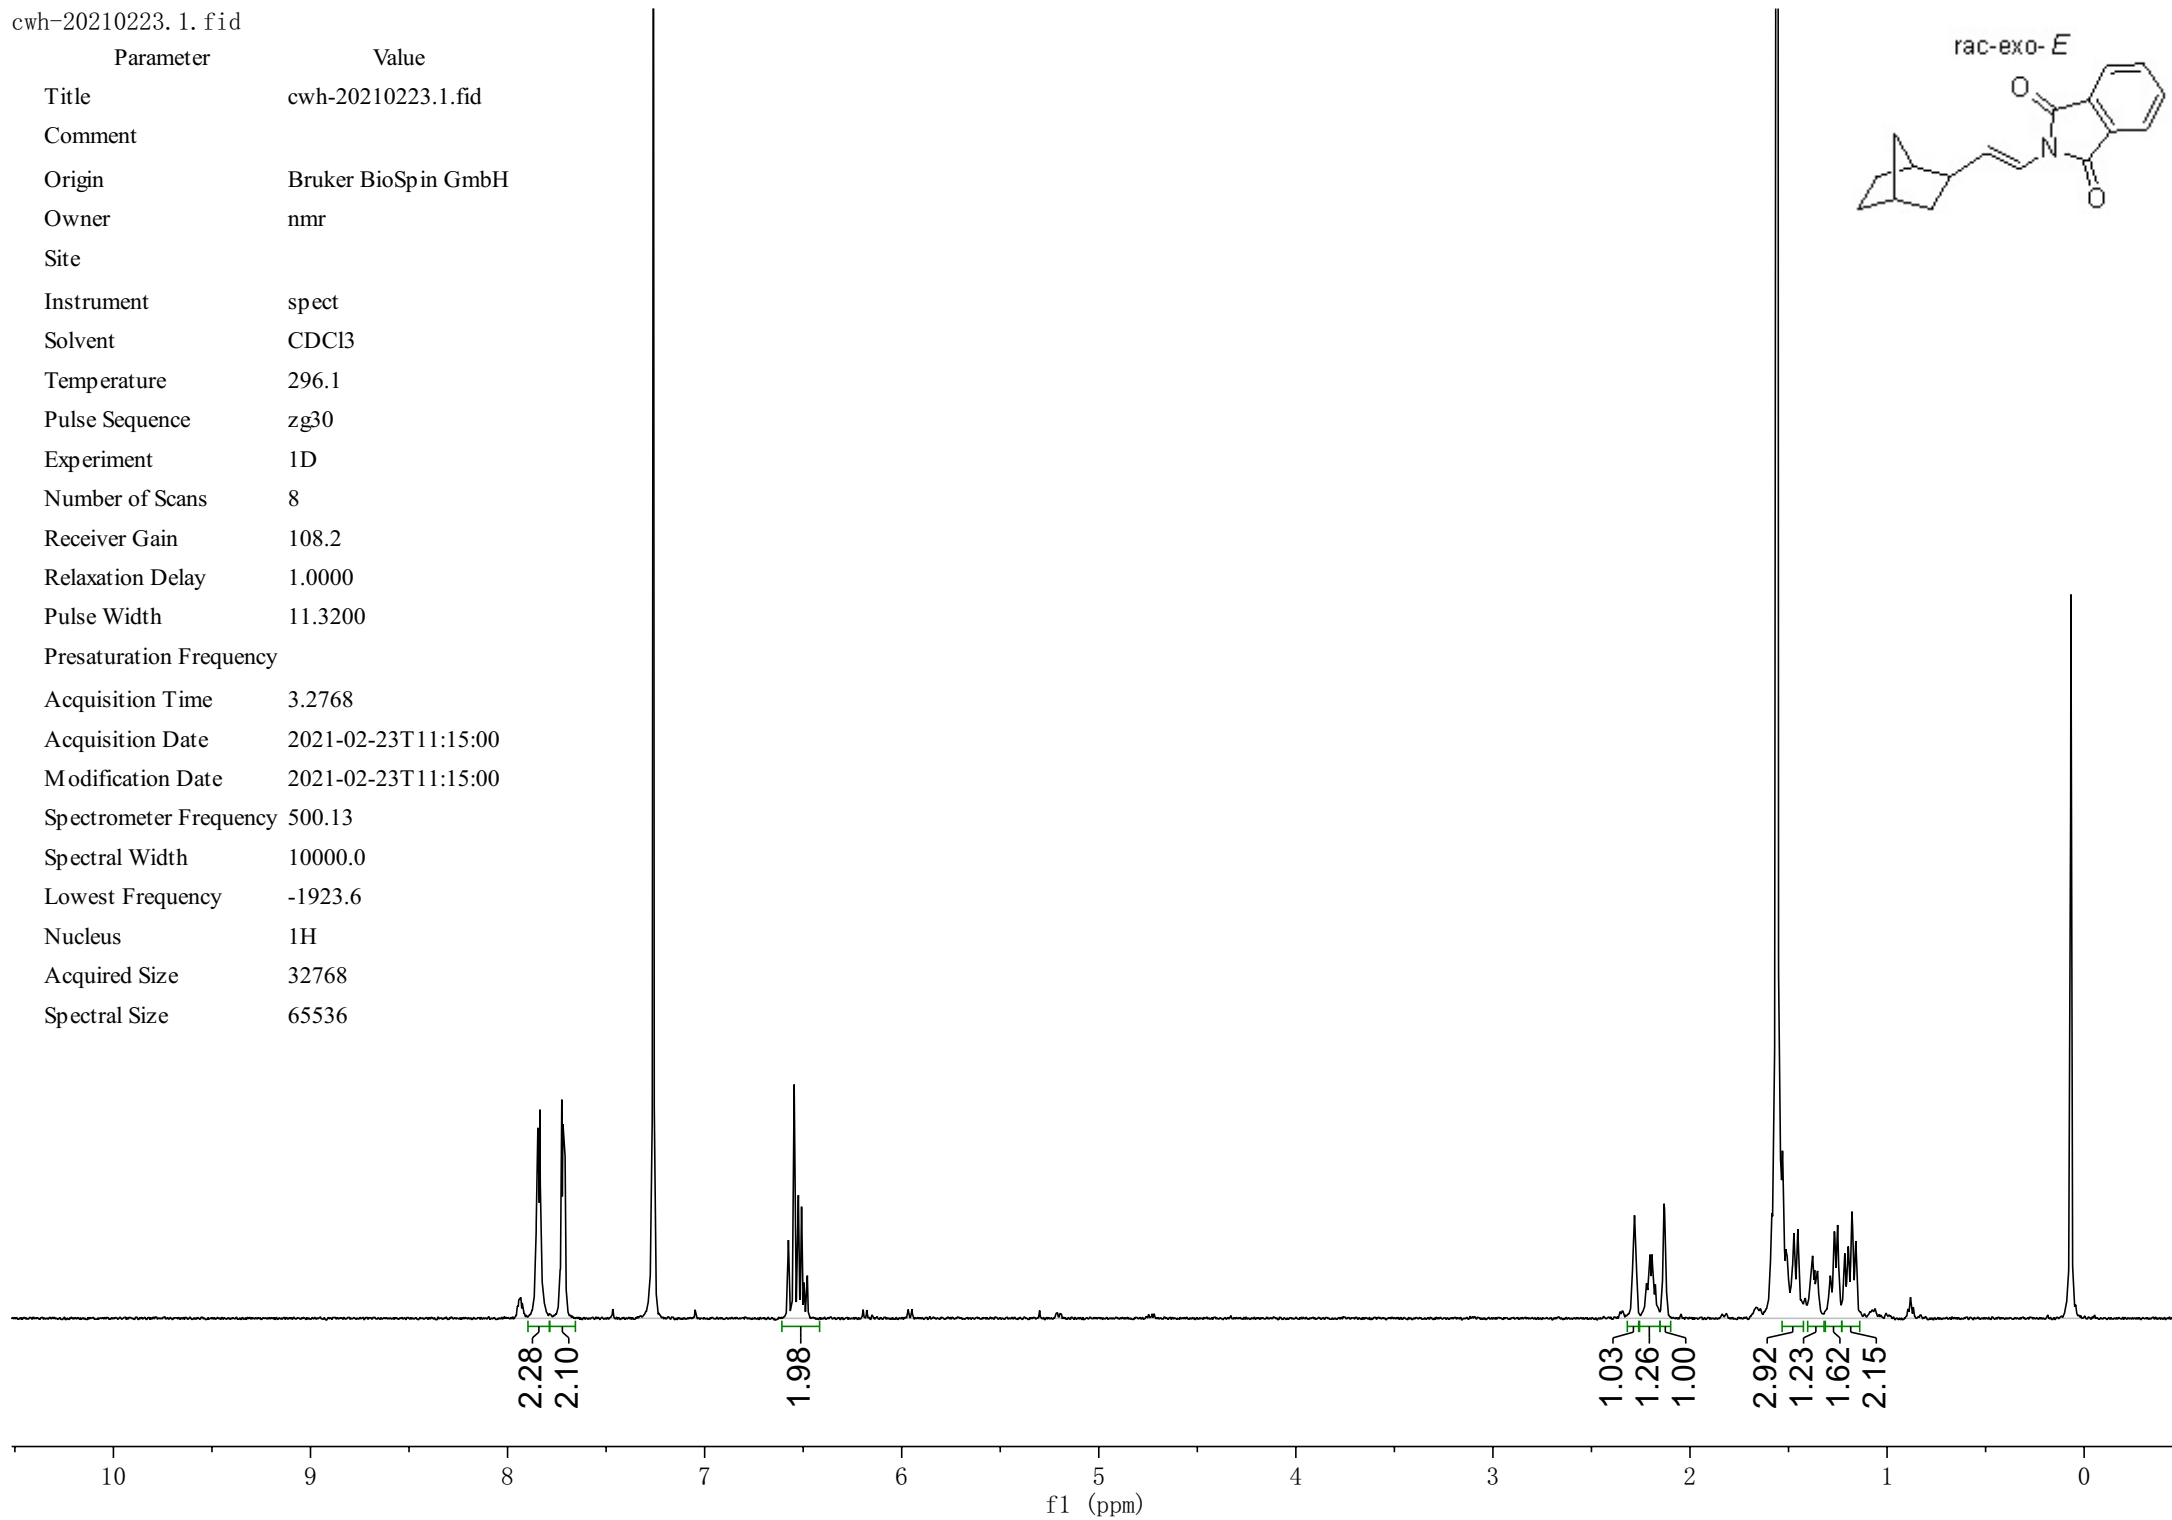

—166.9

~134.4  
~131.9  
~128.2  
~123.5  
~116.0

~44.1  
~42.9  
~38.2  
~36.8  
~35.9  
~29.9  
~29.1

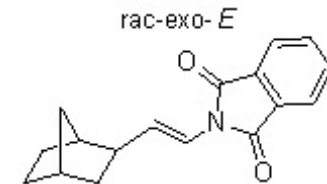

| Parameter               | Value                   |
|-------------------------|-------------------------|
| Title                   | cwh-20210203-1098.1.fid |
| Comment                 |                         |
| Origin                  | Bruker BioSpin GmbH     |
| Owner                   | nmr                     |
| Site                    |                         |
| Instrument              | spect                   |
| Solvent                 | CDC13                   |
| Temperature             | 296.1                   |
| Pulse Sequence          | zgp30                   |
| Experiment              | 1D                      |
| Number of Scans         | 256                     |
| Receiver Gain           | 193.1                   |
| Relaxation Delay        | 2.0000                  |
| Pulse Width             | 9.6000                  |
| Presaturation Frequency |                         |
| Acquisition Time        | 1.1010                  |
| Acquisition Date        | 2021-02-03T13:44:54     |
| Modification Date       | 2021-02-03T13:58:00     |
| Spectrometer Frequency  | 125.77                  |
| Spectral Width          | 29761.9                 |
| Lowest Frequency        | -2288.8                 |
| Nucleus                 | 13C                     |
| Acquired Size           | 32768                   |
| Spectral Size           | 65536                   |

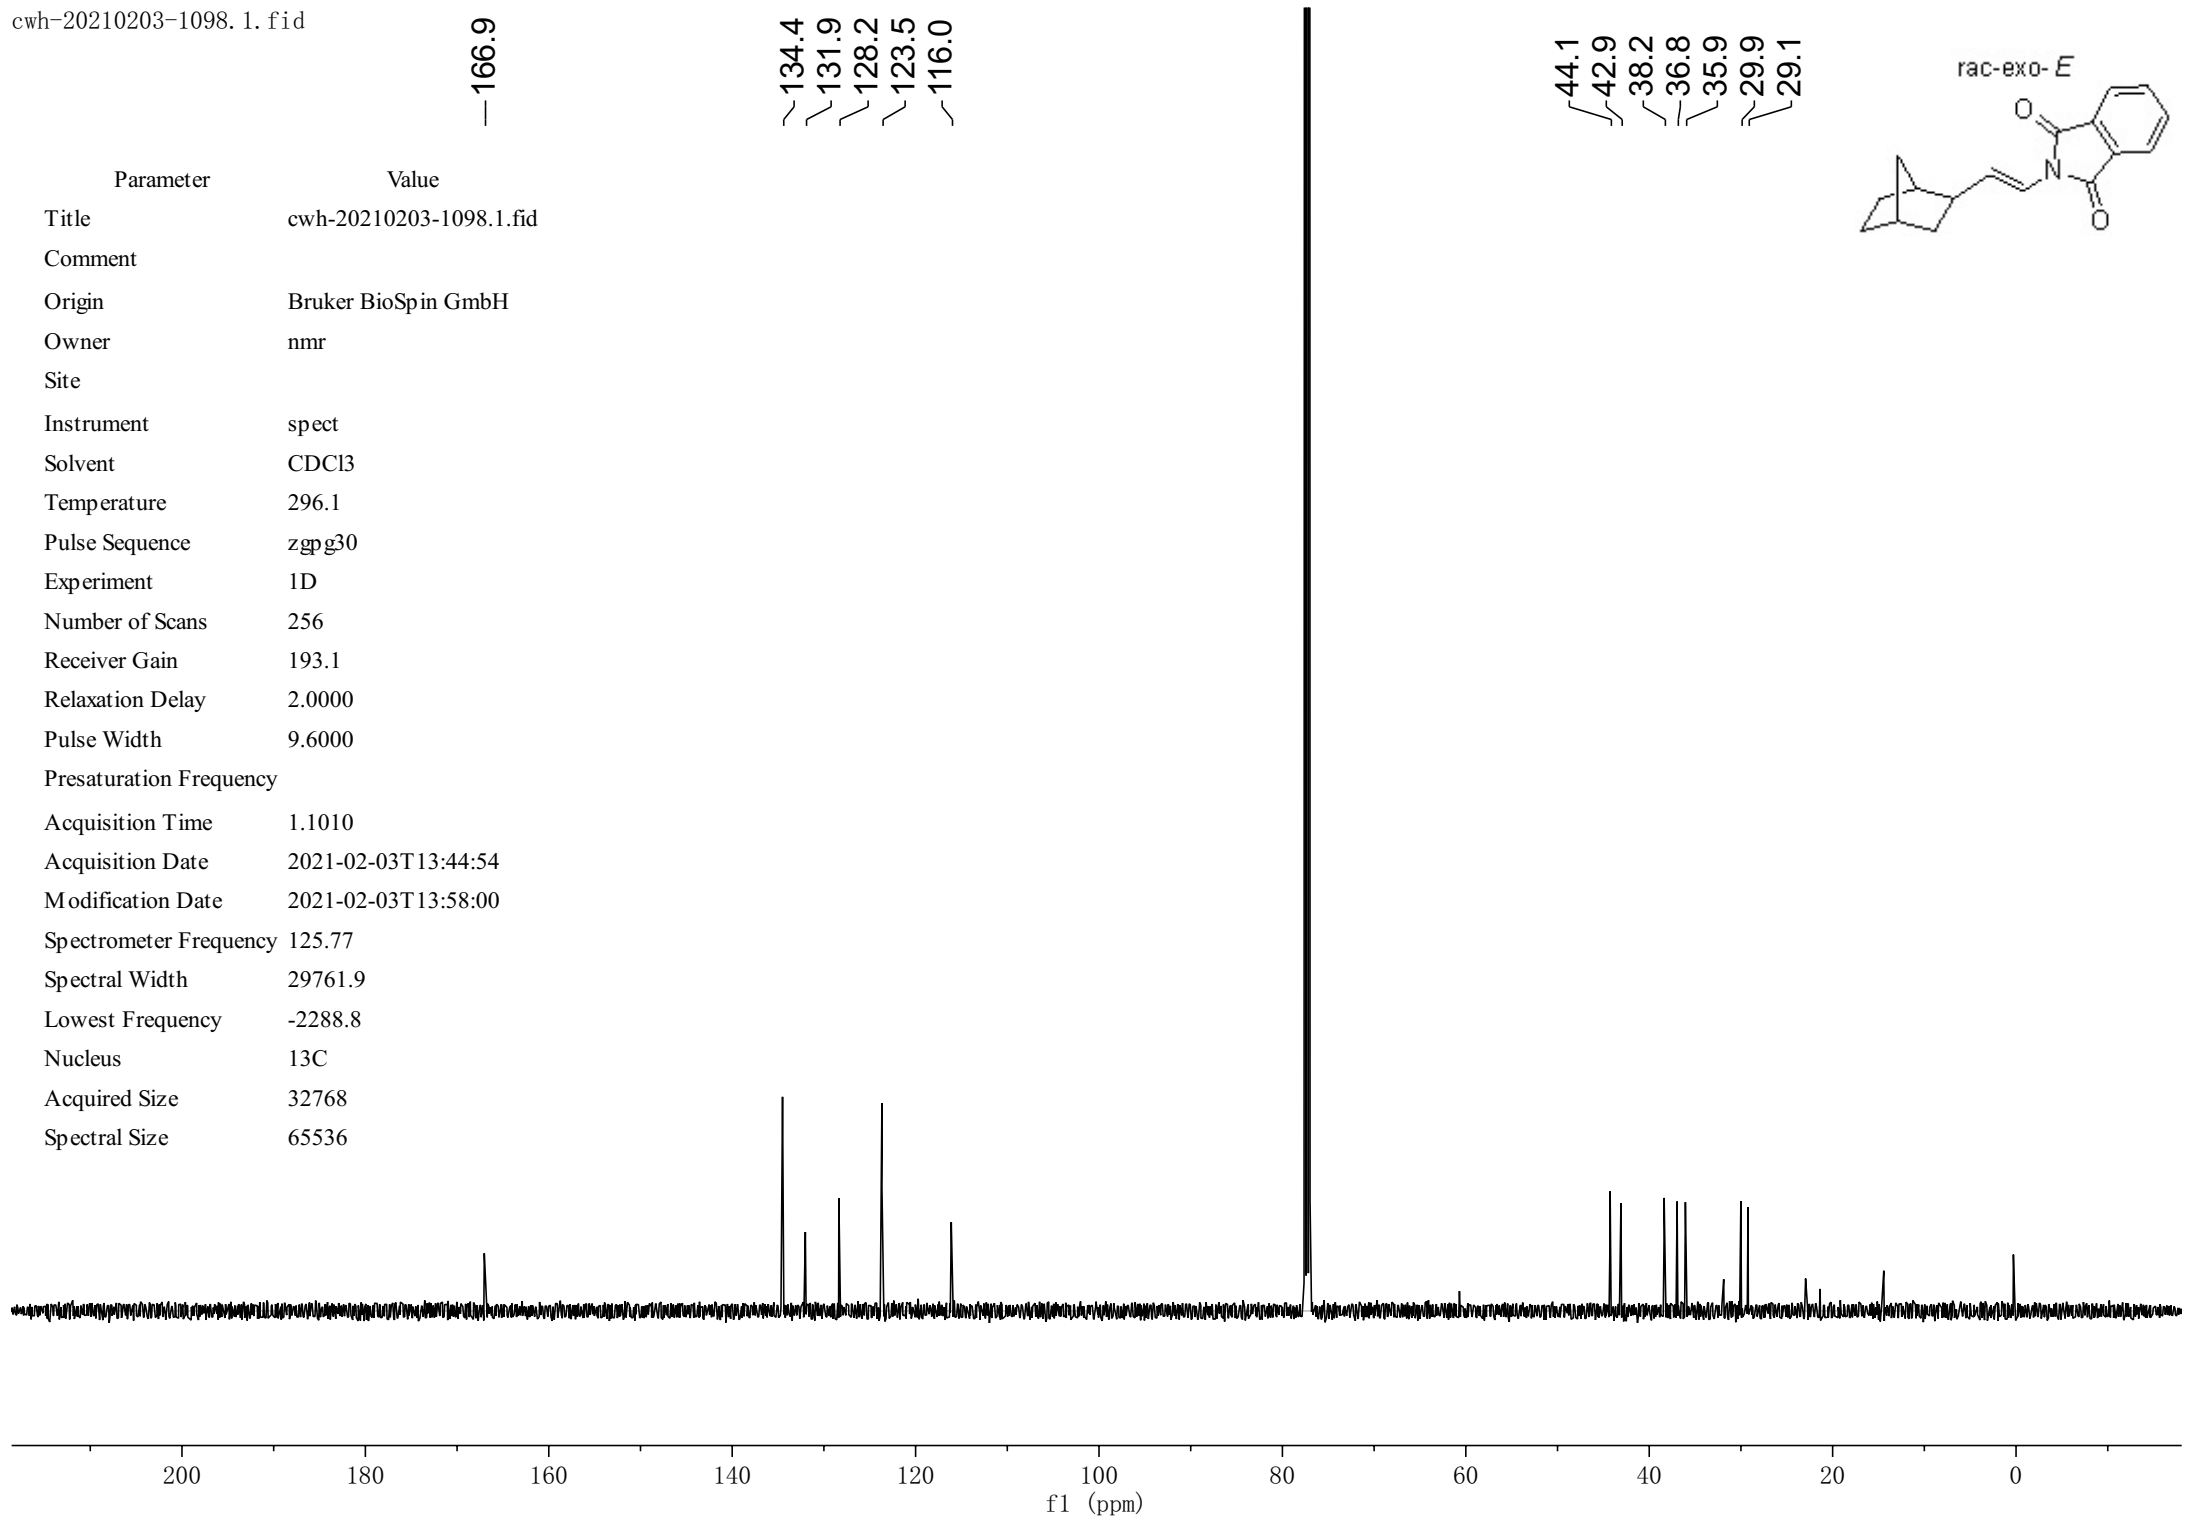



| Parameter               | Value                 |
|-------------------------|-----------------------|
| Title                   | YM-20210203-2-1.1.fid |
| Comment                 |                       |
| Origin                  | Bruker BioSpin GmbH   |
| Owner                   | nmr                   |
| Site                    |                       |
| Instrument              | spect                 |
| Solvent                 | CDC13                 |
| Temperature             | 296.2                 |
| Pulse Sequence          | zg30                  |
| Experiment              | 1D                    |
| Number of Scans         | 5                     |
| Receiver Gain           | 62.9                  |
| Relaxation Delay        | 10.0000               |
| Pulse Width             | 10.7100               |
| Presaturation Frequency |                       |
| Acquisition Time        | 3.2768                |
| Acquisition Date        | 2021-02-03T17:49:02   |
| Modification Date       | 2021-02-03T18:43:01   |
| Spectrometer Frequency  | 500.13                |
| Spectral Width          | 10000.0               |
| Lowest Frequency        | -1924.0               |
| Nucleus                 | <sup>1</sup> H        |
| Acquired Size           | 32768                 |
| Spectral Size           | 65536                 |

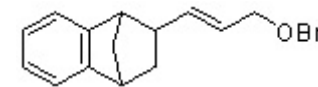

rac-exo-  
E/Z=10:1

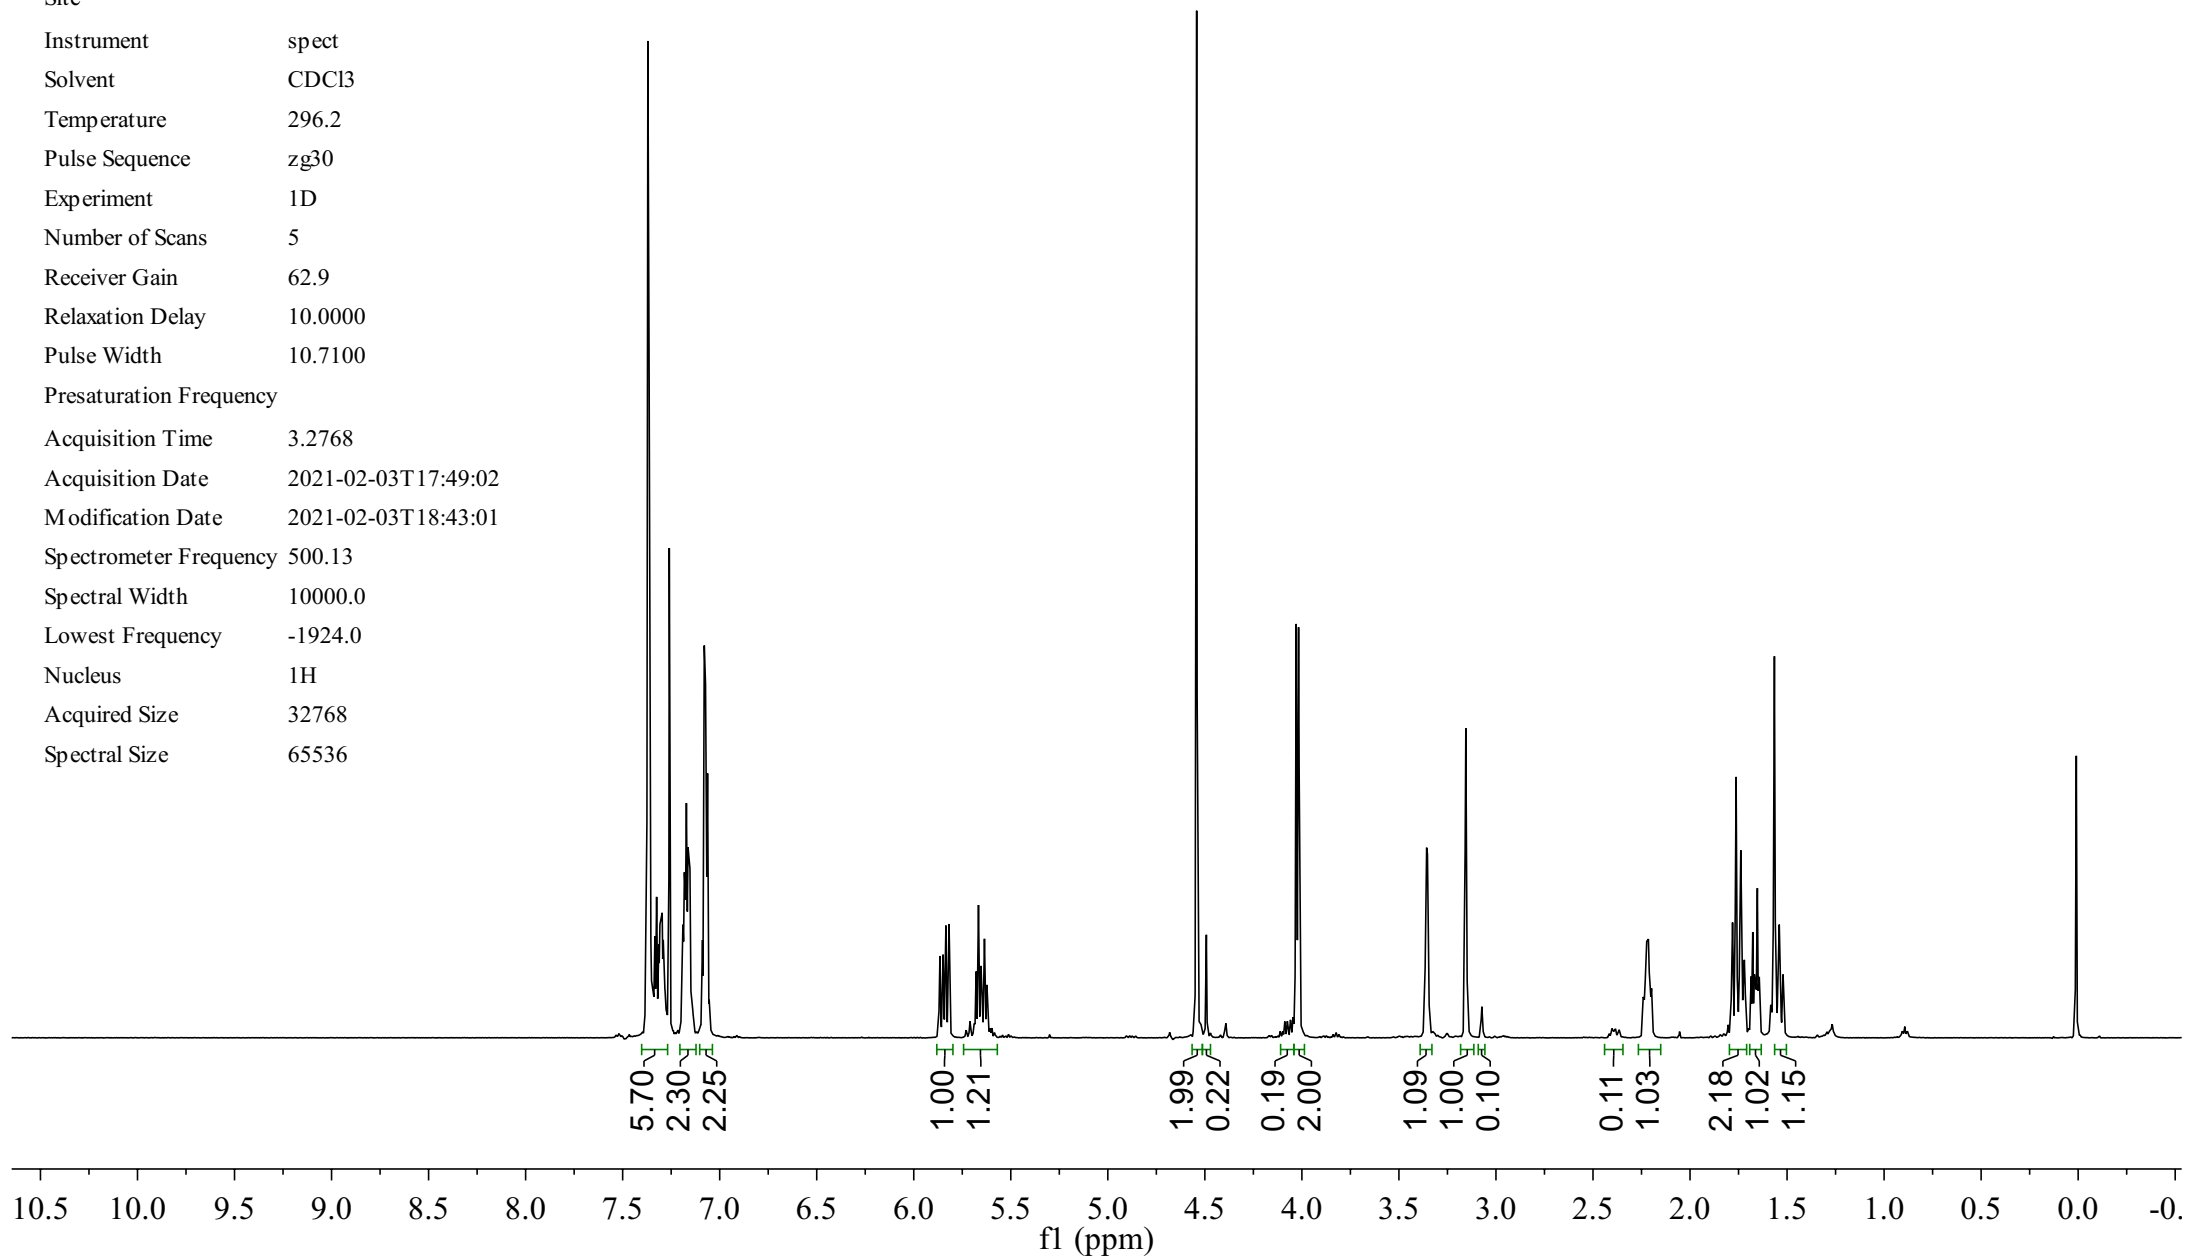

YM-20210203-2-1.2.fid

| Parameter               | Value                 |
|-------------------------|-----------------------|
| Title                   | YM-20210203-2-1.2.fid |
| Comment                 |                       |
| Origin                  | Bruker BioSpin GmbH   |
| Owner                   | nmr                   |
| Site                    |                       |
| Instrument              | spect                 |
| Solvent                 | CDC13                 |
| Temperature             | 296.1                 |
| Pulse Sequence          | zgpg30                |
| Experiment              | 1D                    |
| Number of Scans         | 54                    |
| Receiver Gain           | 193.1                 |
| Relaxation Delay        | 2.0000                |
| Pulse Width             | 9.6000                |
| Presaturation Frequency |                       |
| Acquisition Time        | 1.1010                |
| Acquisition Date        | 2021-02-04T14:36:29   |
| Modification Date       | 2021-03-03T14:33:55   |
| Spectrometer Frequency  | 125.77                |
| Spectral Width          | 29761.9               |
| Lowest Frequency        | -2291.3               |
| Nucleus                 | <sup>13</sup> C       |
| Acquired Size           | 32768                 |
| Spectral Size           | 65536                 |

148.6  
148.3  
139.1  
138.5  
128.5  
128.0  
127.7  
125.8  
125.7  
125.5  
120.8  
120.7

72.2  
71.1

49.9  
46.4  
44.2  
43.1  
35.3

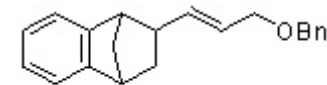

rac-exo-  
E/Z=10:1

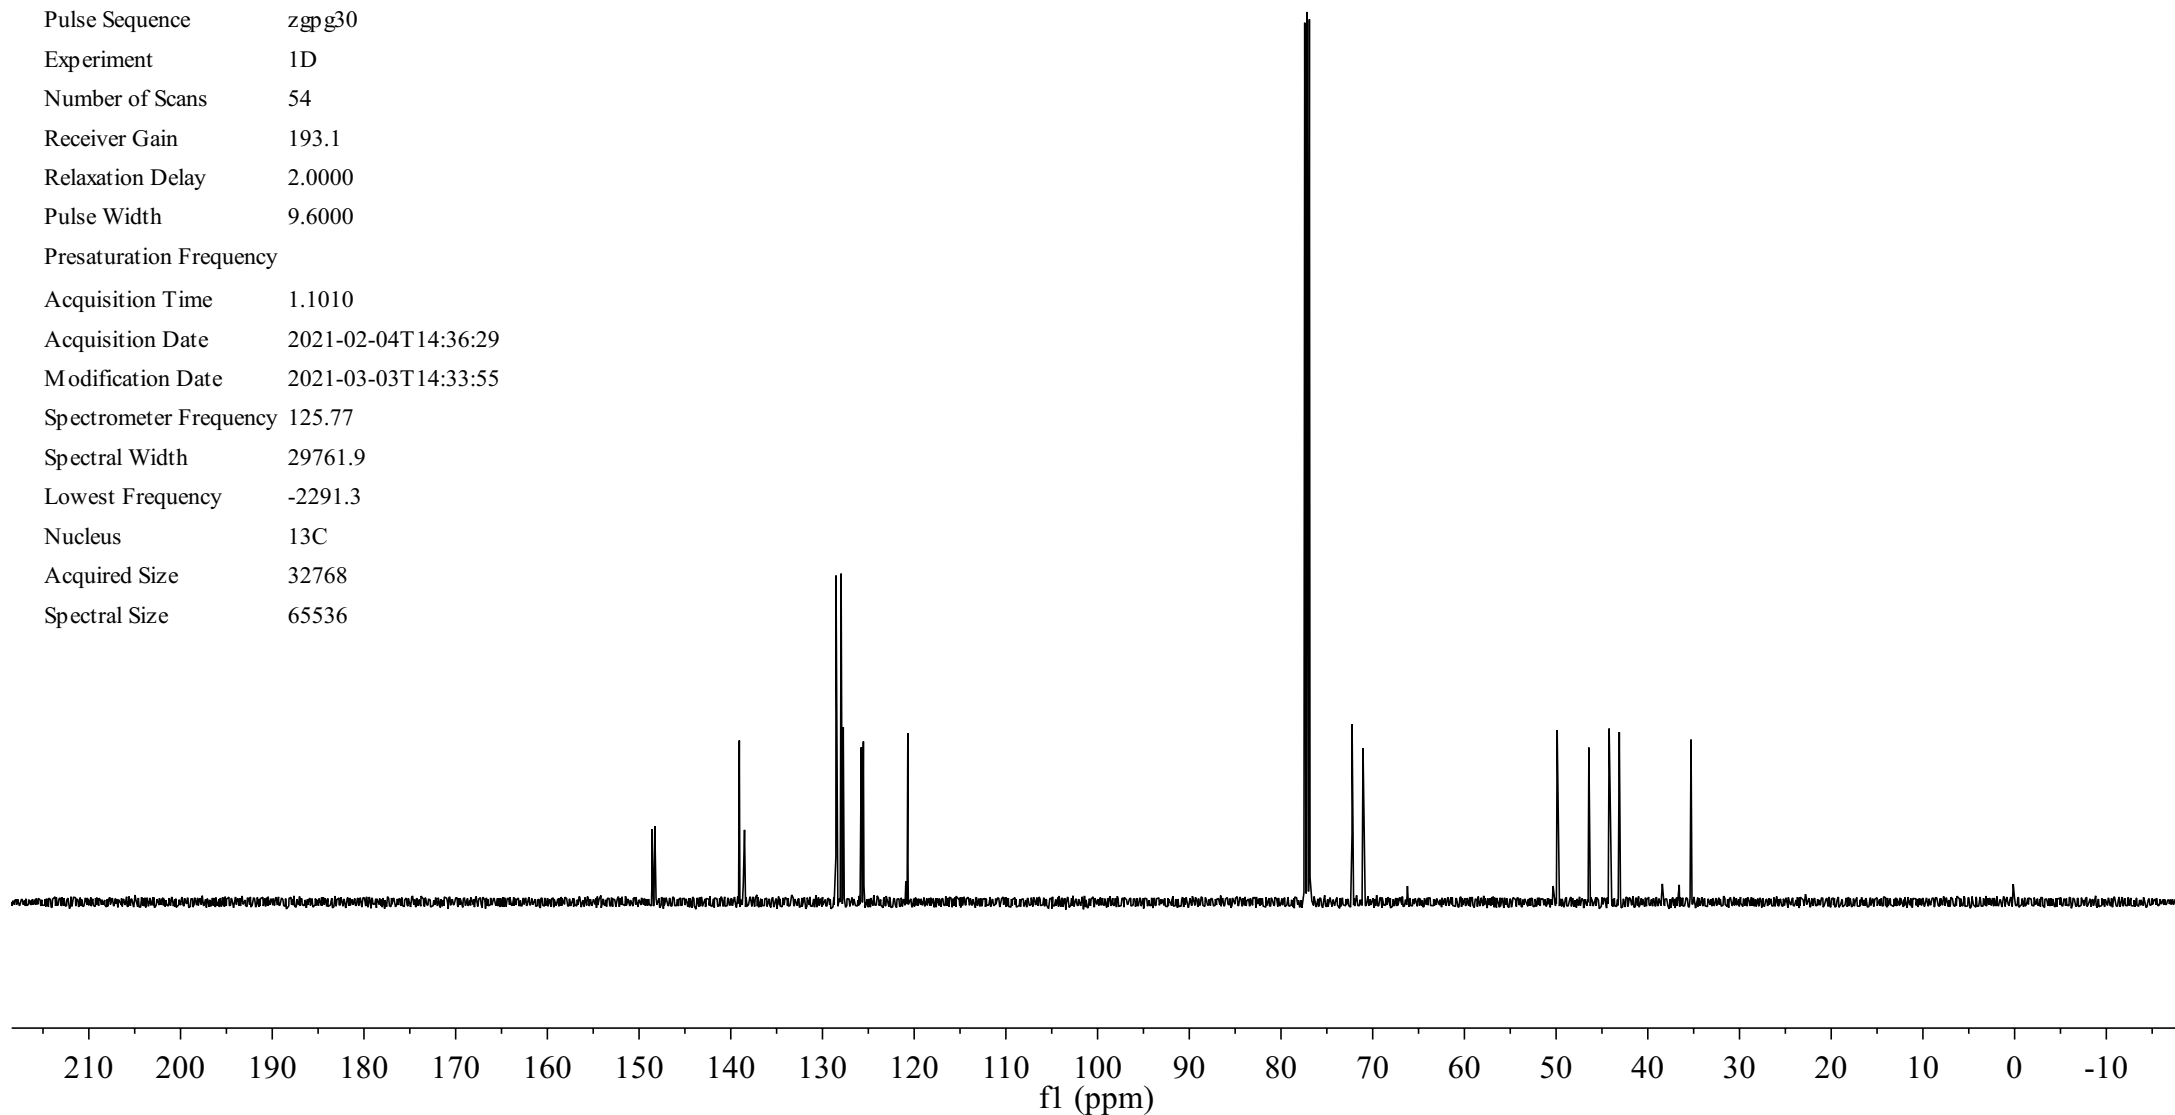

YM-20210901-5-5.1.fid

| Parameter               | Value                 |
|-------------------------|-----------------------|
| Title                   | YM-20210901-5-5.1.fid |
| Comment                 |                       |
| Origin                  | Bruker BioSpin GmbH   |
| Owner                   | nmr                   |
| Site                    |                       |
| Instrument              | spect                 |
| Solvent                 | CDC13                 |
| Temperature             | 295.5                 |
| Pulse Sequence          | zg30                  |
| Experiment              | 1D                    |
| Number of Scans         | 16                    |
| Receiver Gain           | 97.6                  |
| Relaxation Delay        | 1.0000                |
| Pulse Width             | 9.1500                |
| Presaturation Frequency |                       |
| Acquisition Time        | 1.9999                |
| Acquisition Date        | 2021-09-12T21:28:39   |
| Modification Date       | 2021-09-13T09:55:50   |
| Spectrometer Frequency  | 400.13                |
| Spectral Width          | 8012.8                |
| Lowest Frequency        | -1542.3               |
| Nucleus                 | 1H                    |
| Acquired Size           | 16025                 |
| Spectral Size           | 65536                 |

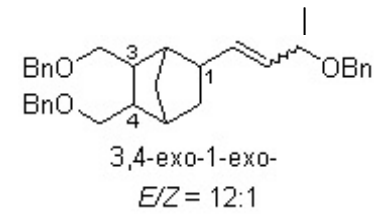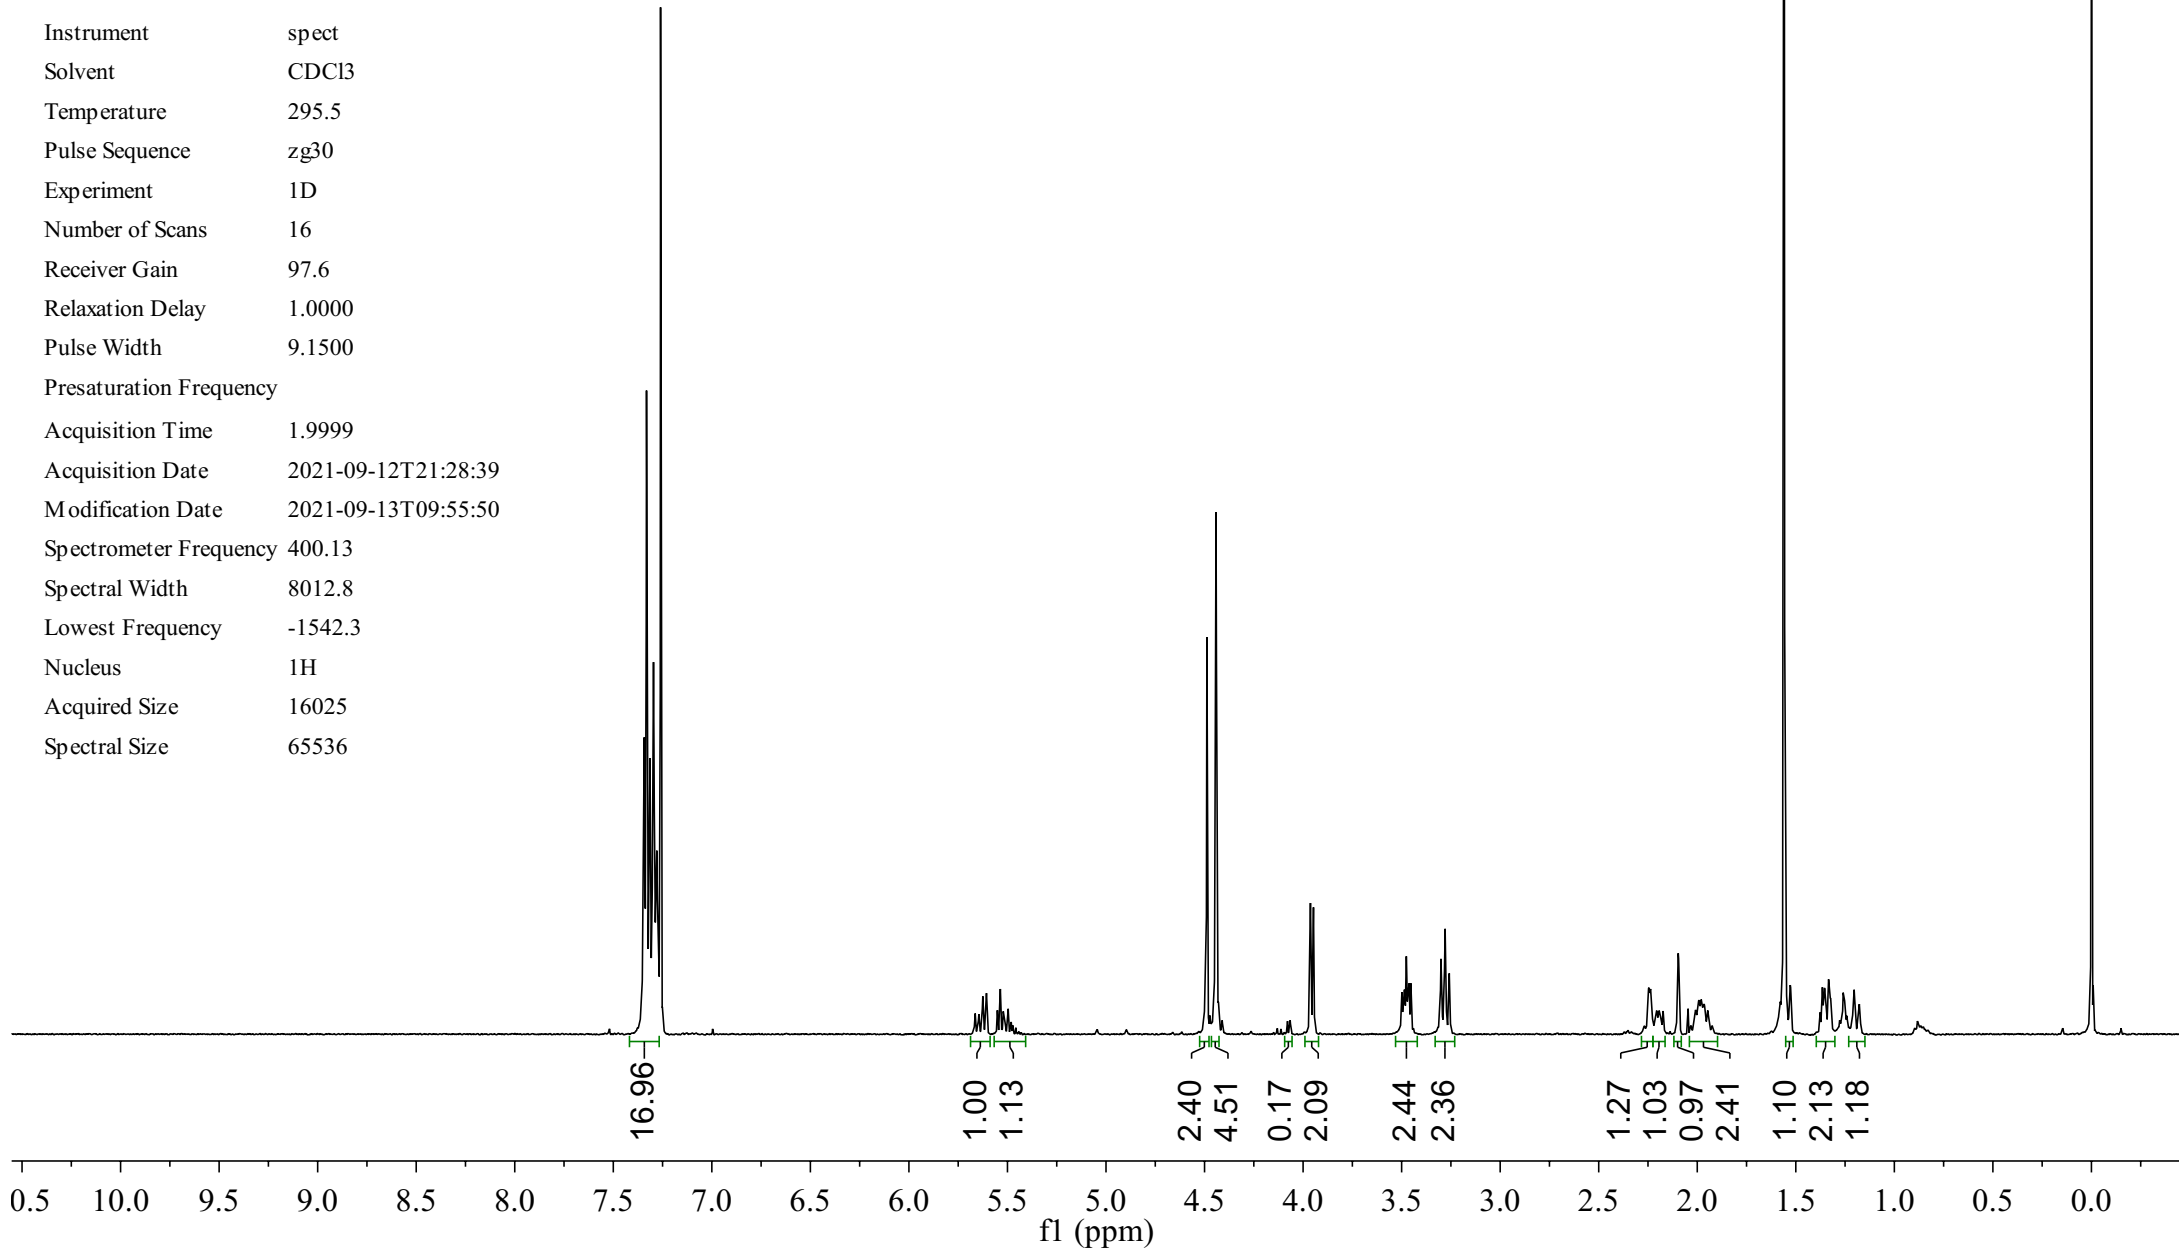

YM-20210901-5-5.2.fid

| Parameter               | Value                 |
|-------------------------|-----------------------|
| Title                   | YM-20210901-5-5.2.fid |
| Comment                 |                       |
| Origin                  | Bruker BioSpin GmbH   |
| Owner                   | nmr                   |
| Site                    |                       |
| Instrument              | spect                 |
| Solvent                 | CDC13                 |
| Temperature             | 296.2                 |
| Pulse Sequence          | zgpg30                |
| Experiment              | 1D                    |
| Number of Scans         | 183                   |
| Receiver Gain           | 193.1                 |
| Relaxation Delay        | 2.0000                |
| Pulse Width             | 9.9400                |
| Presaturation Frequency |                       |
| Acquisition Time        | 1.1010                |
| Acquisition Date        | 2021-09-13T14:44:34   |
| Modification Date       | 2021-09-13T16:24:12   |
| Spectrometer Frequency  | 125.77                |
| Spectral Width          | 29761.9               |
| Lowest Frequency        | -2288.9               |
| Nucleus                 | <sup>13</sup> C       |
| Acquired Size           | 32768                 |
| Spectral Size           | 65536                 |

139.7  
138.7  
138.7  
138.6  
128.5  
128.0  
127.8  
127.7  
127.6  
124.2

73.2  
73.2  
72.0  
71.1  
70.6  
70.4

45.9  
45.5  
45.0  
44.7  
40.2  
37.5  
31.1

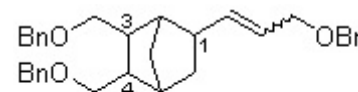

3,4-exo-1-exo-  
*E/Z* = 12:1

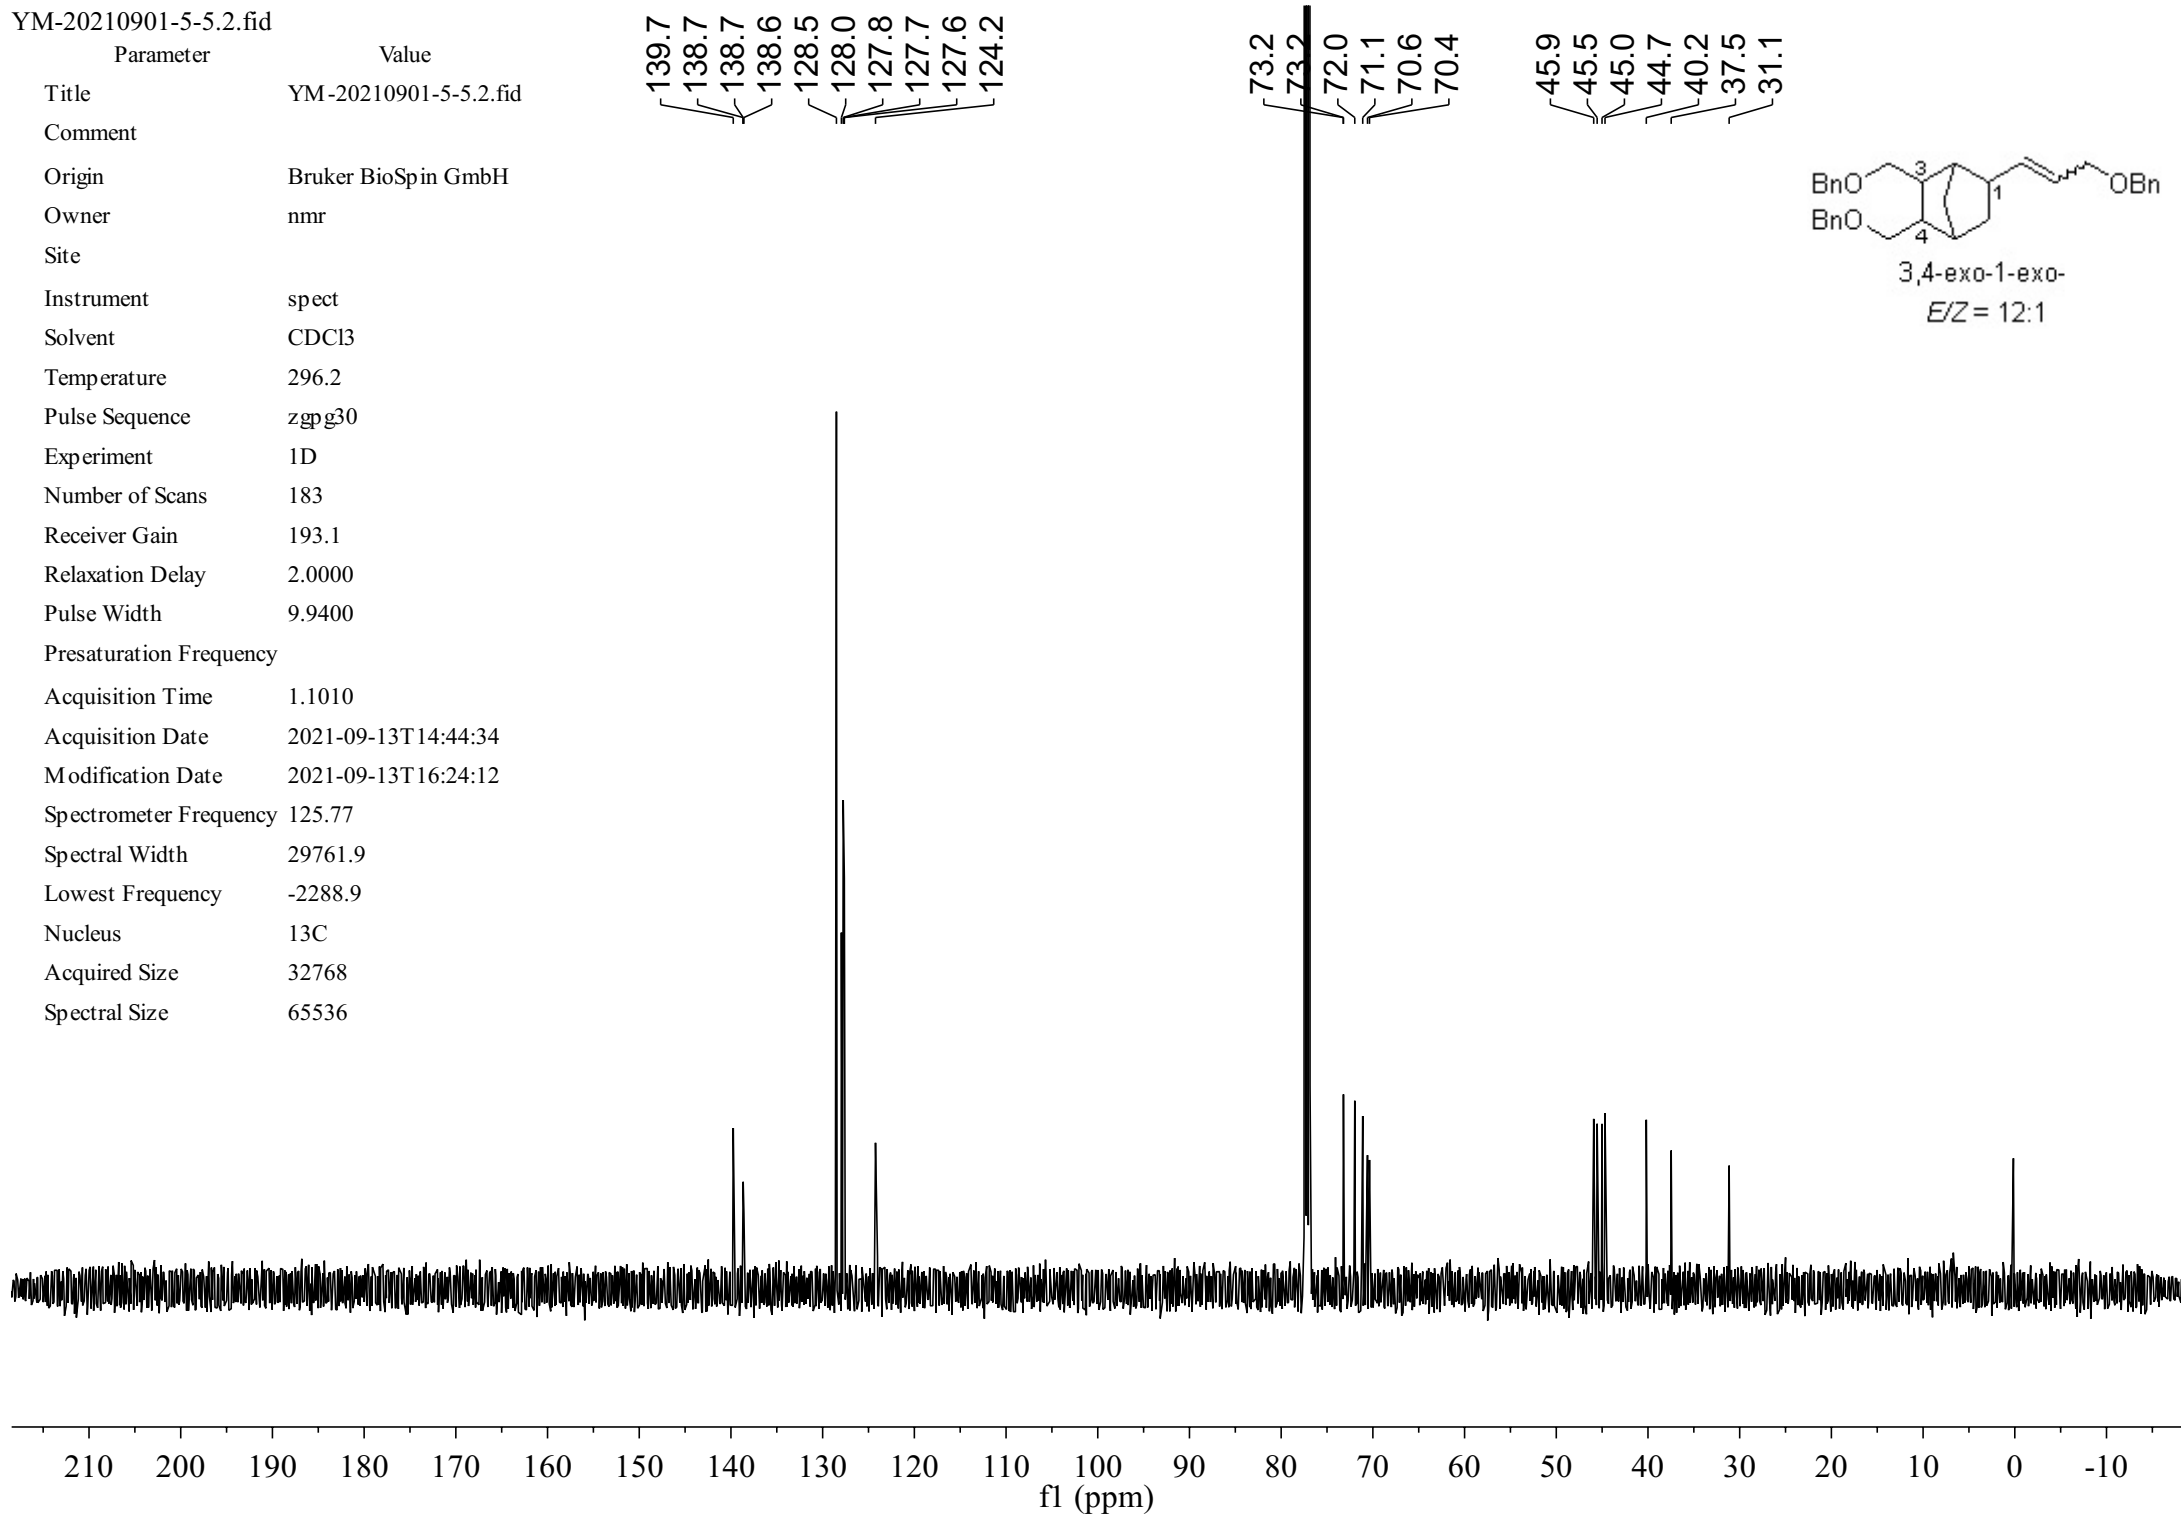

YM-20210707-10-4.3.fid

| Parameter               | Value                  |
|-------------------------|------------------------|
| Title                   | YM-20210707-10-4.3.fid |
| Comment                 |                        |
| Origin                  | Bruker BioSpin GmbH    |
| Owner                   | nmr                    |
| Site                    |                        |
| Instrument              | spect                  |
| Solvent                 | CDC13                  |
| Temperature             | 296.1                  |
| Pulse Sequence          | zg30                   |
| Experiment              | 1D                     |
| Number of Scans         | 16                     |
| Receiver Gain           | 77.6                   |
| Relaxation Delay        | 1.0000                 |
| Pulse Width             | 11.3200                |
| Presaturation Frequency |                        |
| Acquisition Time        | 3.2768                 |
| Acquisition Date        | 2021-07-15T18:04:49    |
| Modification Date       | 2021-07-15T19:17:47    |
| Spectrometer Frequency  | 500.13                 |
| Spectral Width          | 10000.0                |
| Lowest Frequency        | -1923.5                |
| Nucleus                 | 1H                     |
| Acquired Size           | 32768                  |
| Spectral Size           | 65536                  |

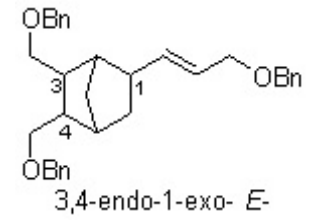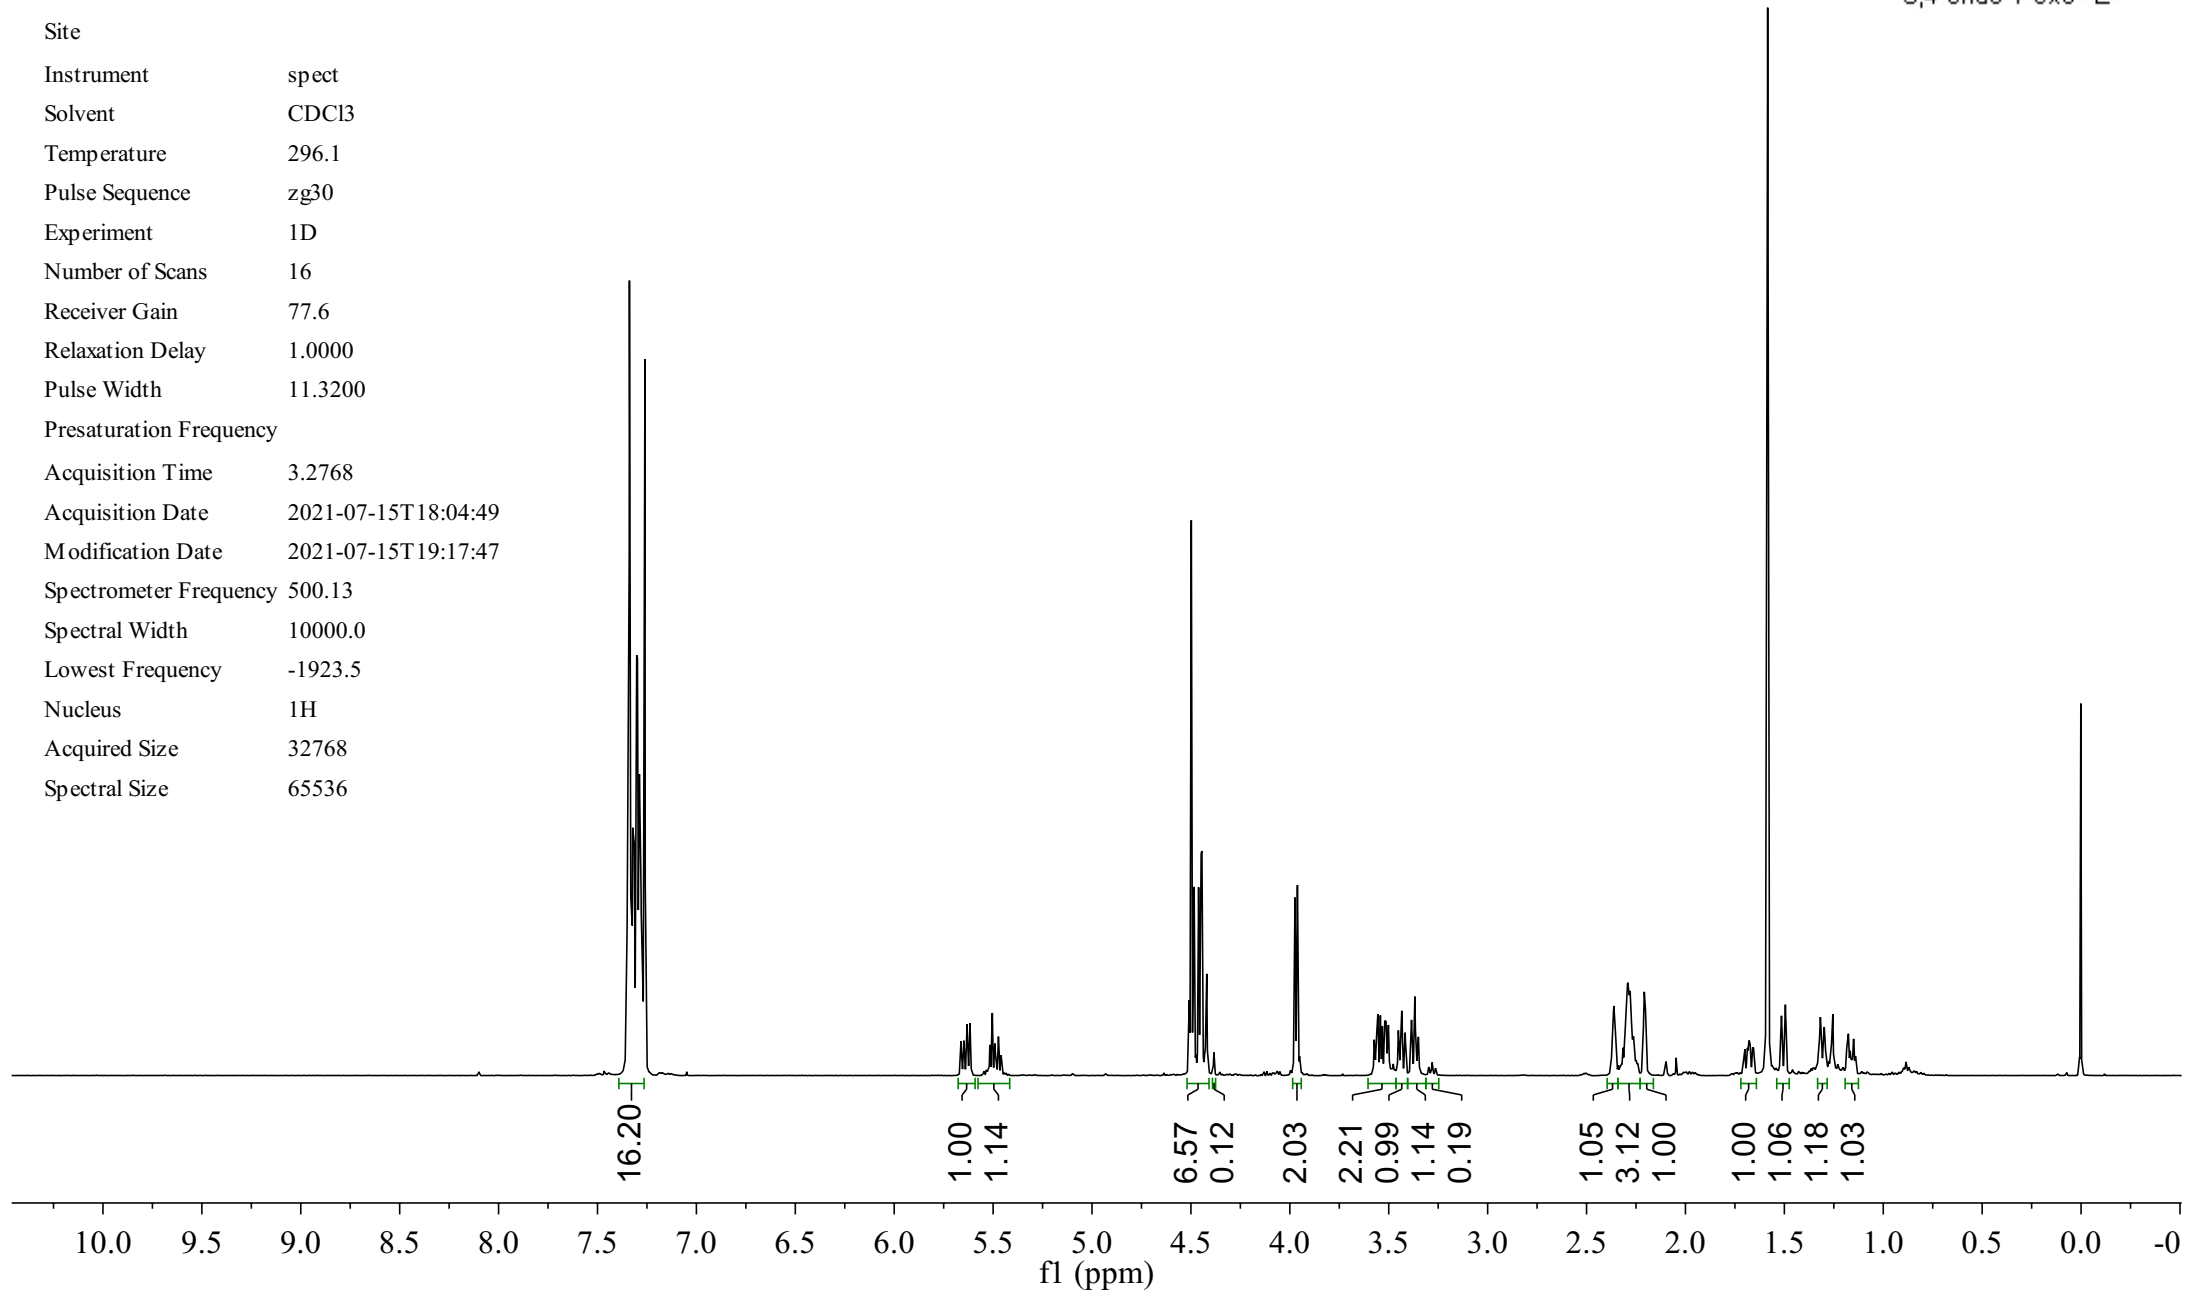

YM-20210707-10-4.7.fid

| Parameter               | Value                  |
|-------------------------|------------------------|
| Title                   | YM-20210707-10-4.7.fid |
| Comment                 |                        |
| Origin                  | Bruker BioSpin GmbH    |
| Owner                   | nmr                    |
| Site                    |                        |
| Instrument              | spect                  |
| Solvent                 | CDC13                  |
| Temperature             | 296.1                  |
| Pulse Sequence          | zgpg30                 |
| Experiment              | 1D                     |
| Number of Scans         | 164                    |
| Receiver Gain           | 193.1                  |
| Relaxation Delay        | 2.0000                 |
| Pulse Width             | 9.9400                 |
| Presaturation Frequency |                        |
| Acquisition Time        | 1.1010                 |
| Acquisition Date        | 2021-07-16T11:48:11    |
| Modification Date       | 2021-07-16T12:36:57    |
| Spectrometer Frequency  | 125.77                 |
| Spectral Width          | 29761.9                |
| Lowest Frequency        | -2289.7                |
| Nucleus                 | <sup>13</sup> C        |
| Acquired Size           | 32768                  |
| Spectral Size           | 65536                  |

140.1  
138.7  
138.7  
138.6  
128.5  
128.5  
128.0  
127.8  
127.8  
127.7  
127.7  
127.6  
124.3  
73.3  
72.0  
71.1  
68.5  
68.0  
45.9  
40.9  
40.3  
39.6  
37.0  
36.5  
31.4  
30.7

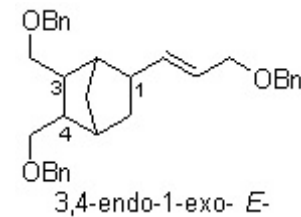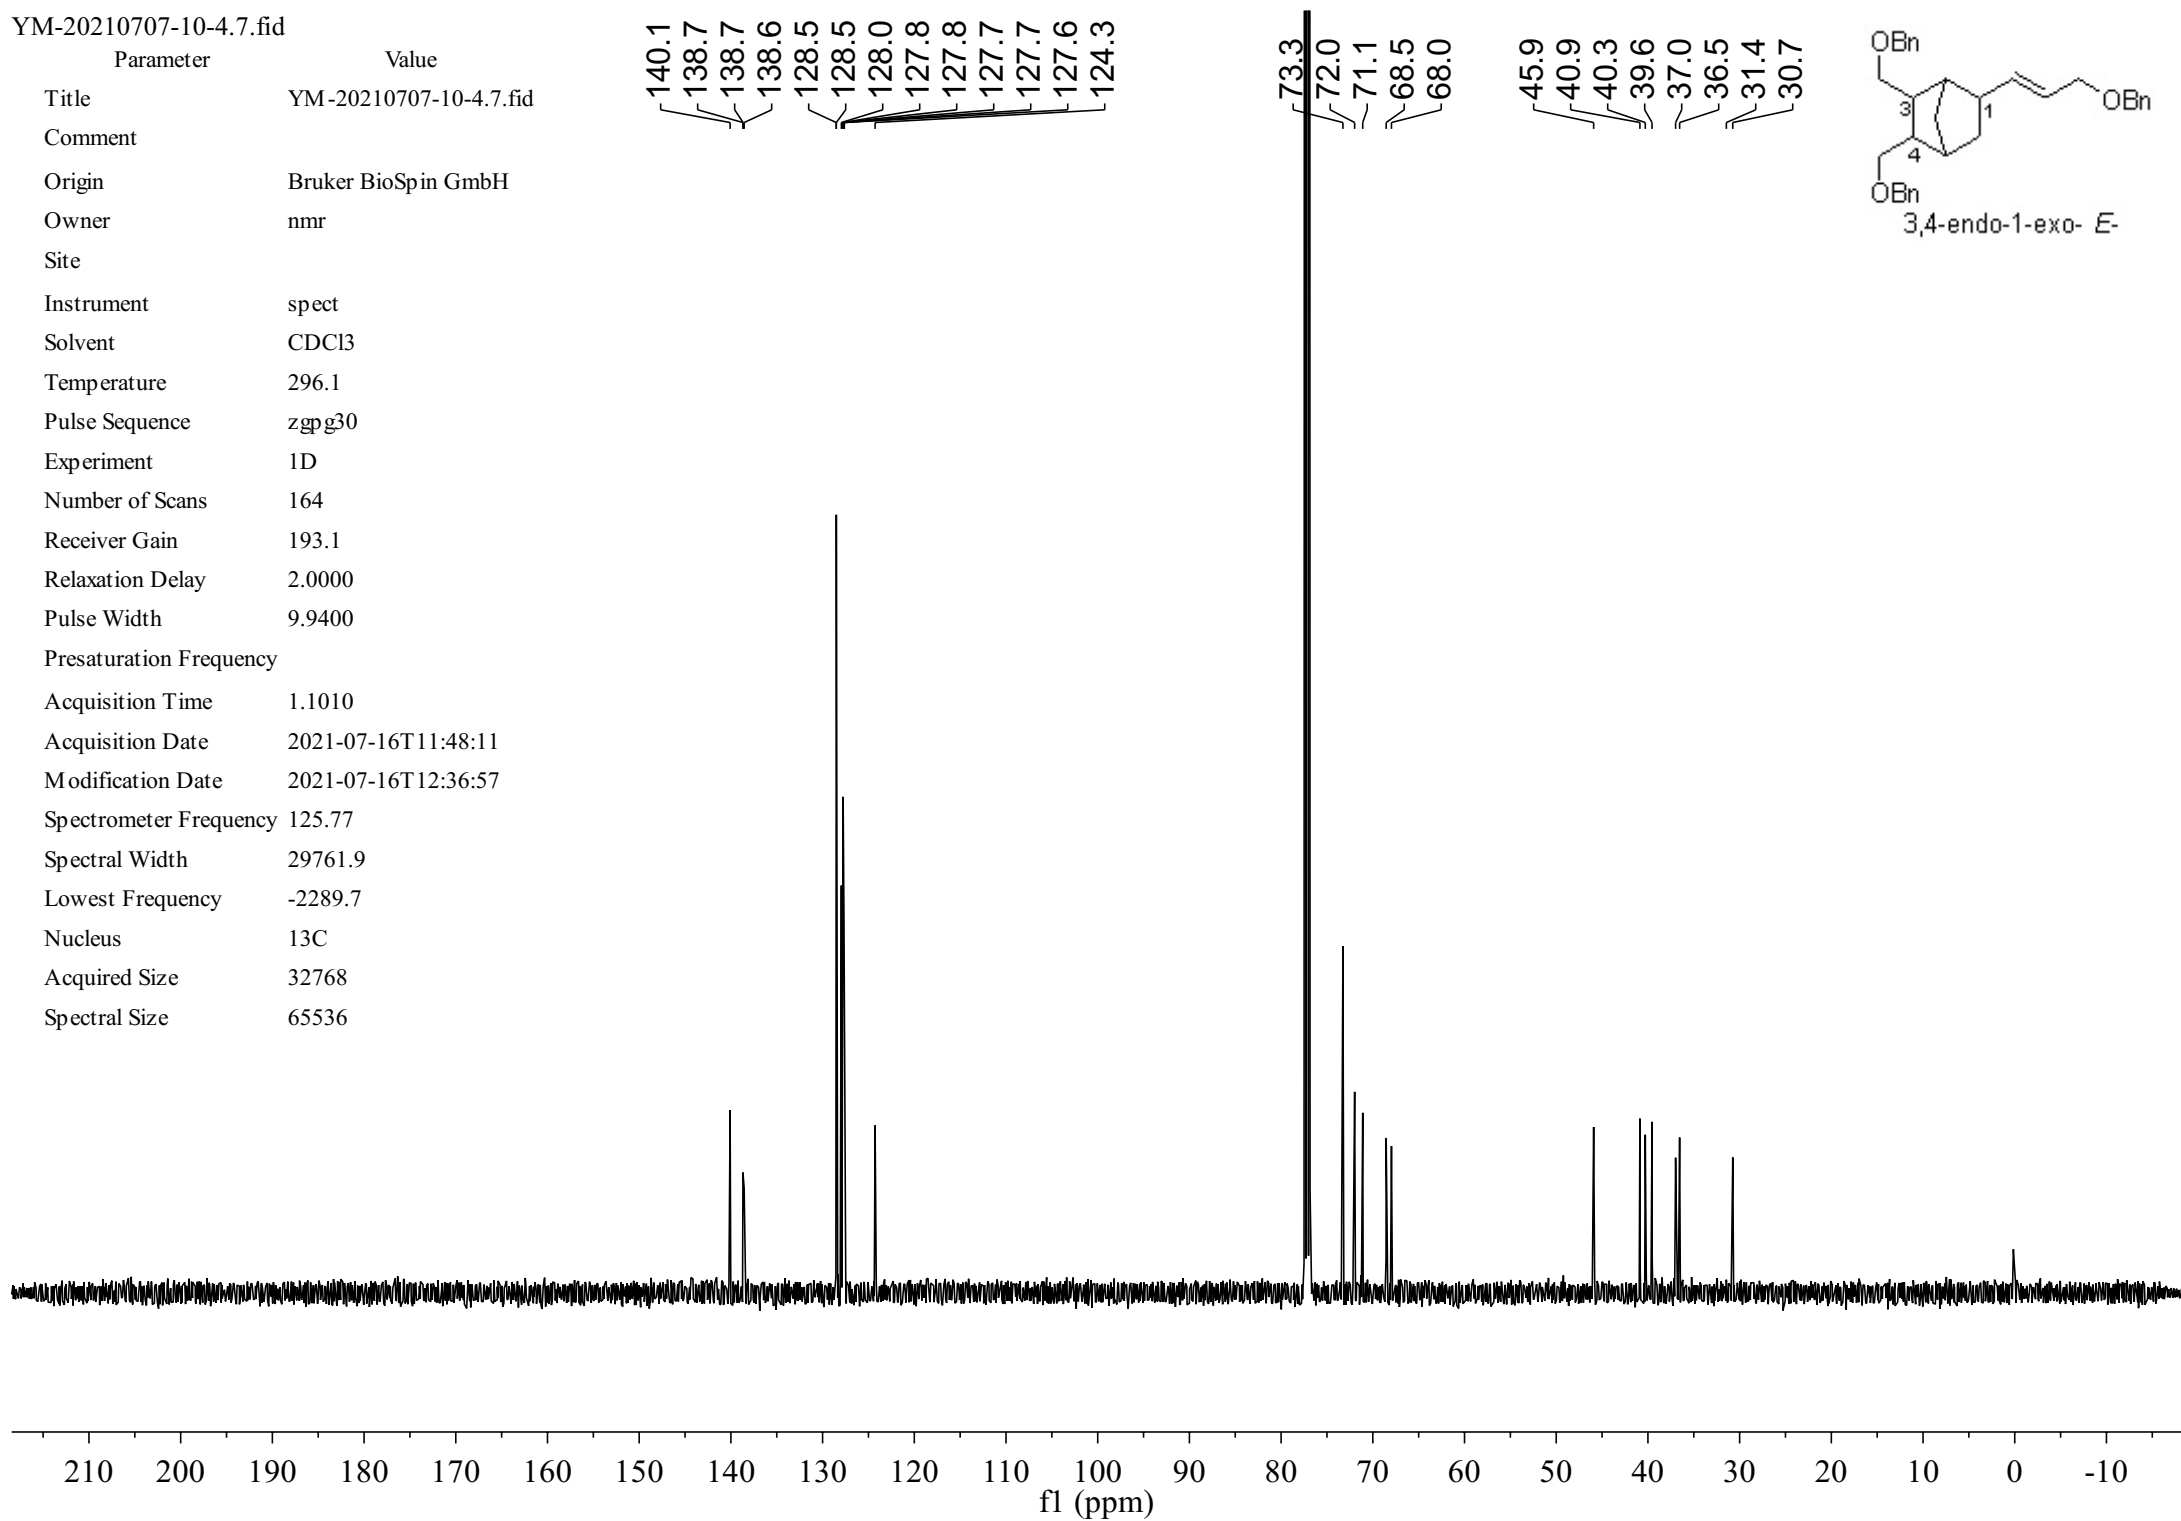

YM-20210707-10-3.2.fid

| Parameter               | Value                  |
|-------------------------|------------------------|
| Title                   | YM-20210707-10-3.2.fid |
| Comment                 |                        |
| Origin                  | Bruker BioSpin GmbH    |
| Owner                   | nmr                    |
| Site                    |                        |
| Instrument              | spect                  |
| Solvent                 | CDC13                  |
| Temperature             | 296.1                  |
| Pulse Sequence          | zg30                   |
| Experiment              | 1D                     |
| Number of Scans         | 9                      |
| Receiver Gain           | 62.9                   |
| Relaxation Delay        | 1.0000                 |
| Pulse Width             | 11.3200                |
| Presaturation Frequency |                        |
| Acquisition Time        | 3.2768                 |
| Acquisition Date        | 2021-08-02T13:23:06    |
| Modification Date       | 2021-08-02T18:52:47    |
| Spectrometer Frequency  | 500.13                 |
| Spectral Width          | 10000.0                |
| Lowest Frequency        | -1923.5                |
| Nucleus                 | 1H                     |
| Acquired Size           | 32768                  |
| Spectral Size           | 65536                  |

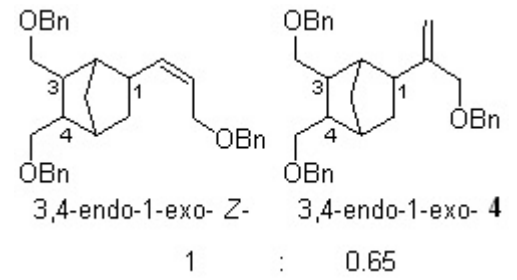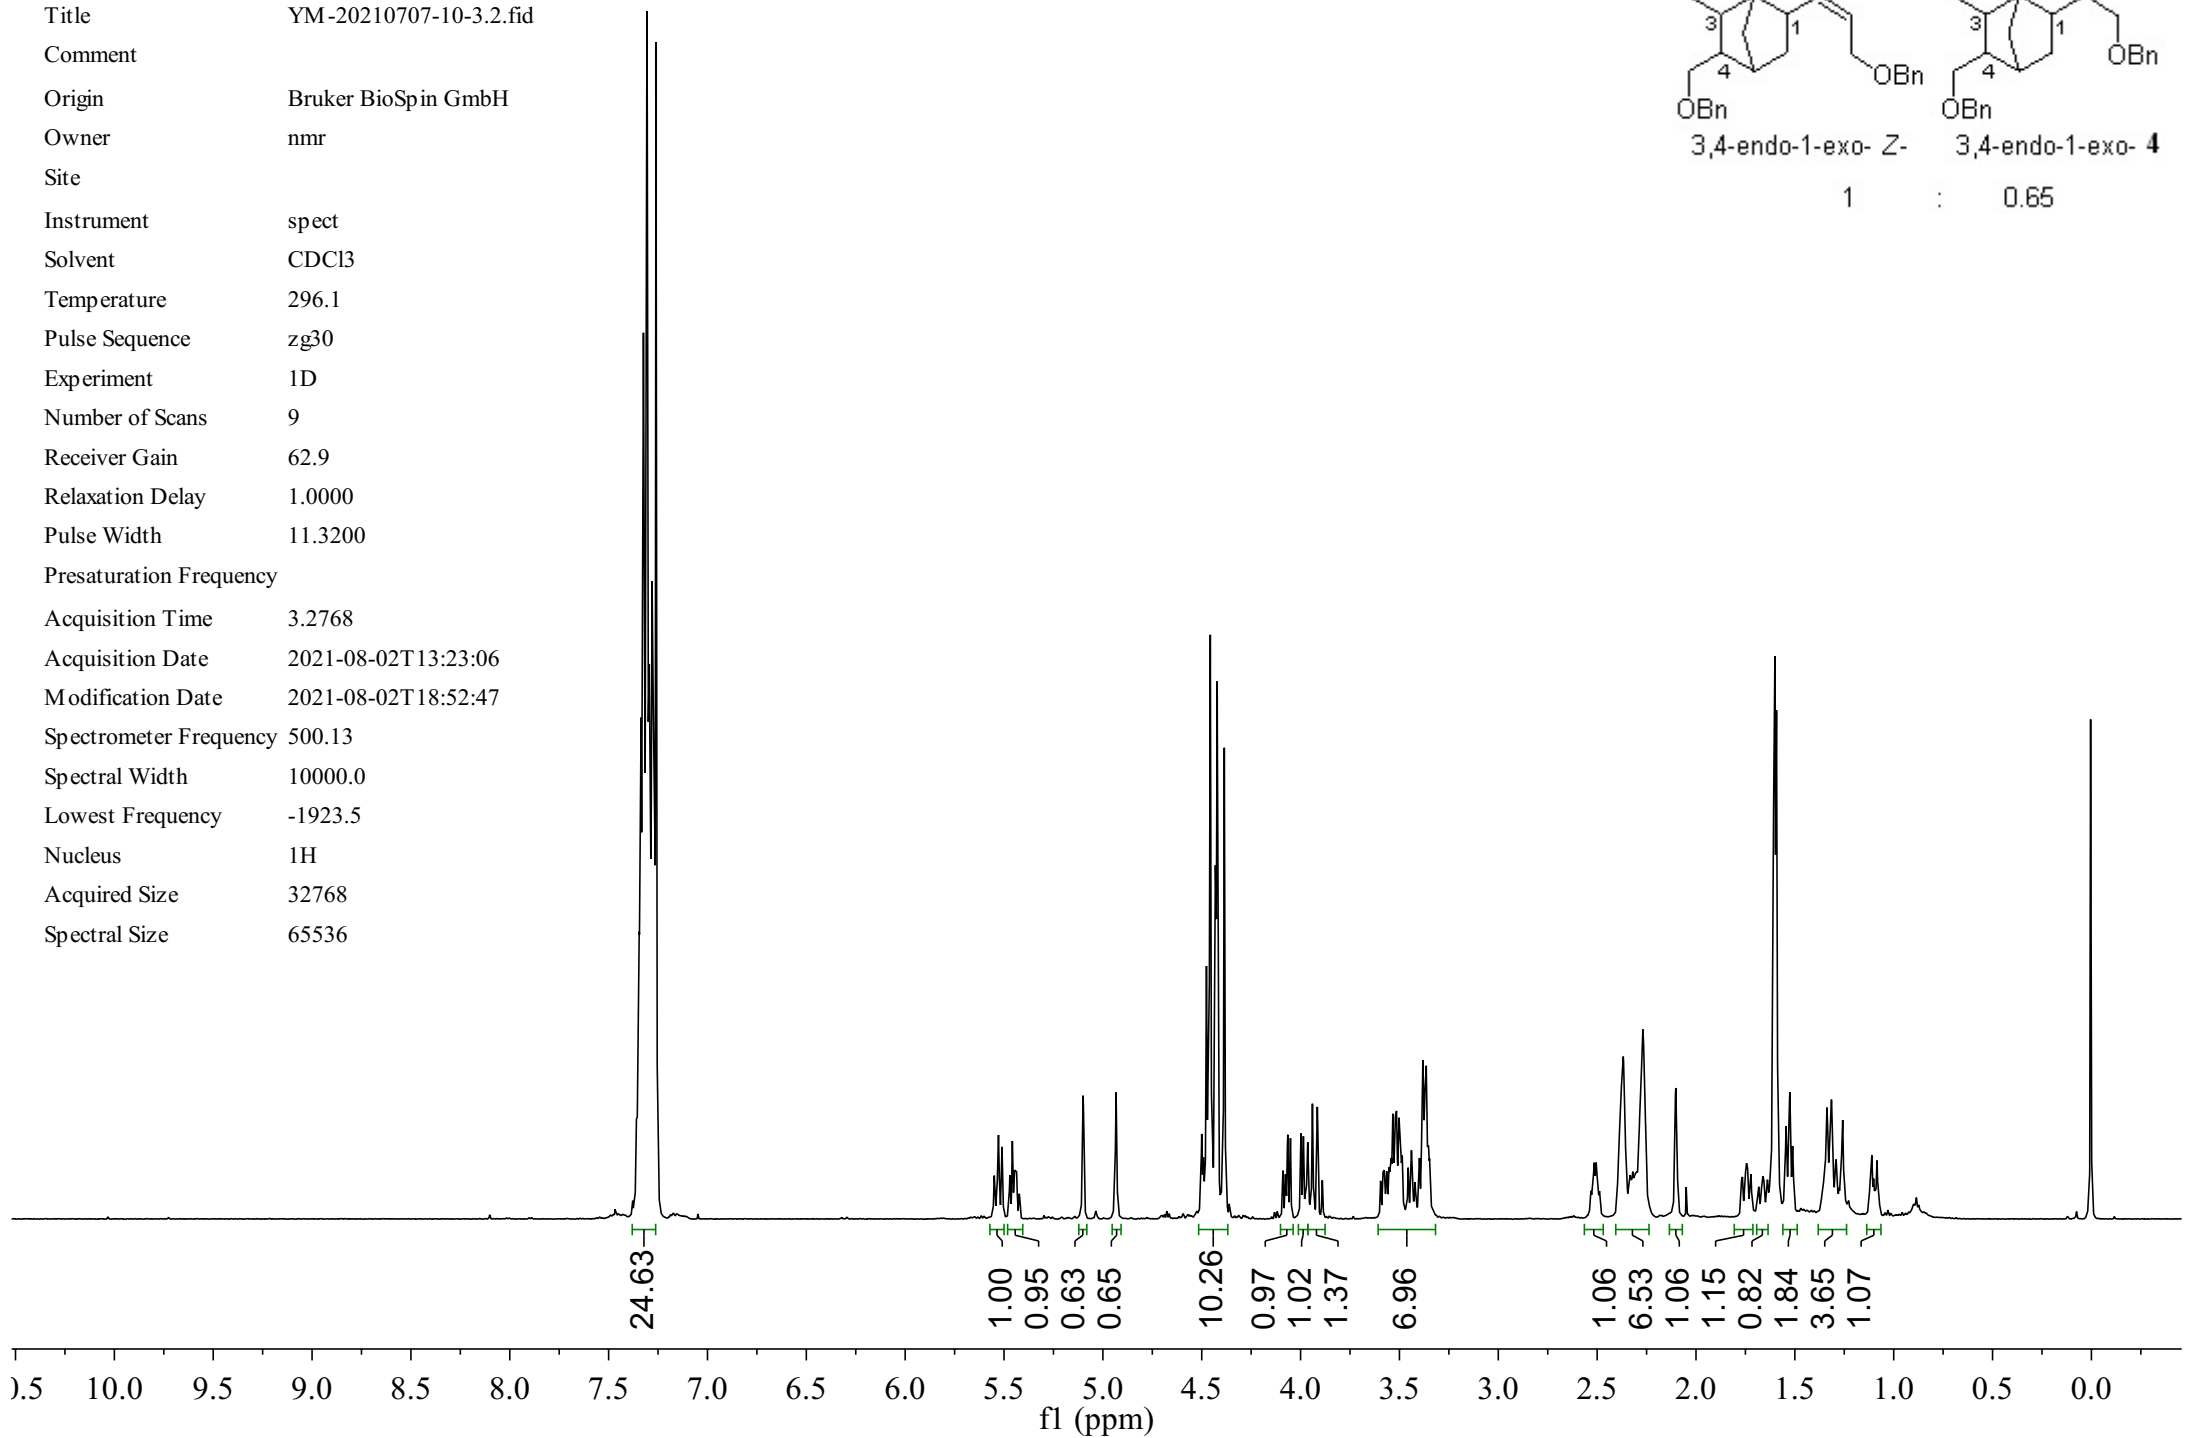

YM-20210707-10-3.5.fid

| Parameter               | Value                  |
|-------------------------|------------------------|
| Title                   | YM-20210707-10-3.5.fid |
| Comment                 |                        |
| Origin                  | Bruker BioSpin GmbH    |
| Owner                   | nmr                    |
| Site                    |                        |
| Instrument              | spect                  |
| Solvent                 | CDC13                  |
| Temperature             | 296.1                  |
| Pulse Sequence          | zgpg30                 |
| Experiment              | 1D                     |
| Number of Scans         | 100                    |
| Receiver Gain           | 193.1                  |
| Relaxation Delay        | 2.0000                 |
| Pulse Width             | 9.9400                 |
| Presaturation Frequency |                        |
| Acquisition Time        | 1.1010                 |
| Acquisition Date        | 2021-08-02T14:23:00    |
| Modification Date       | 2021-08-02T18:52:47    |
| Spectrometer Frequency  | 125.77                 |
| Spectral Width          | 29761.9                |
| Lowest Frequency        | -2290.3                |
| Nucleus                 | 13C                    |
| Acquired Size           | 32768                  |
| Spectral Size           | 65536                  |

149.7 140.2 138.6 138.6 138.6 128.5 128.5 128.5 127.9 127.8 127.8 127.7 127.7 127.6 124.4 109.3 73.3 73.3 73.3 72.1 71.9 68.7 68.5 68.0 67.9 66.0 46.9 43.9 41.2 40.8 40.2 40.2 39.5 39.5 37.2 35.9 32.4 32.1 29.5

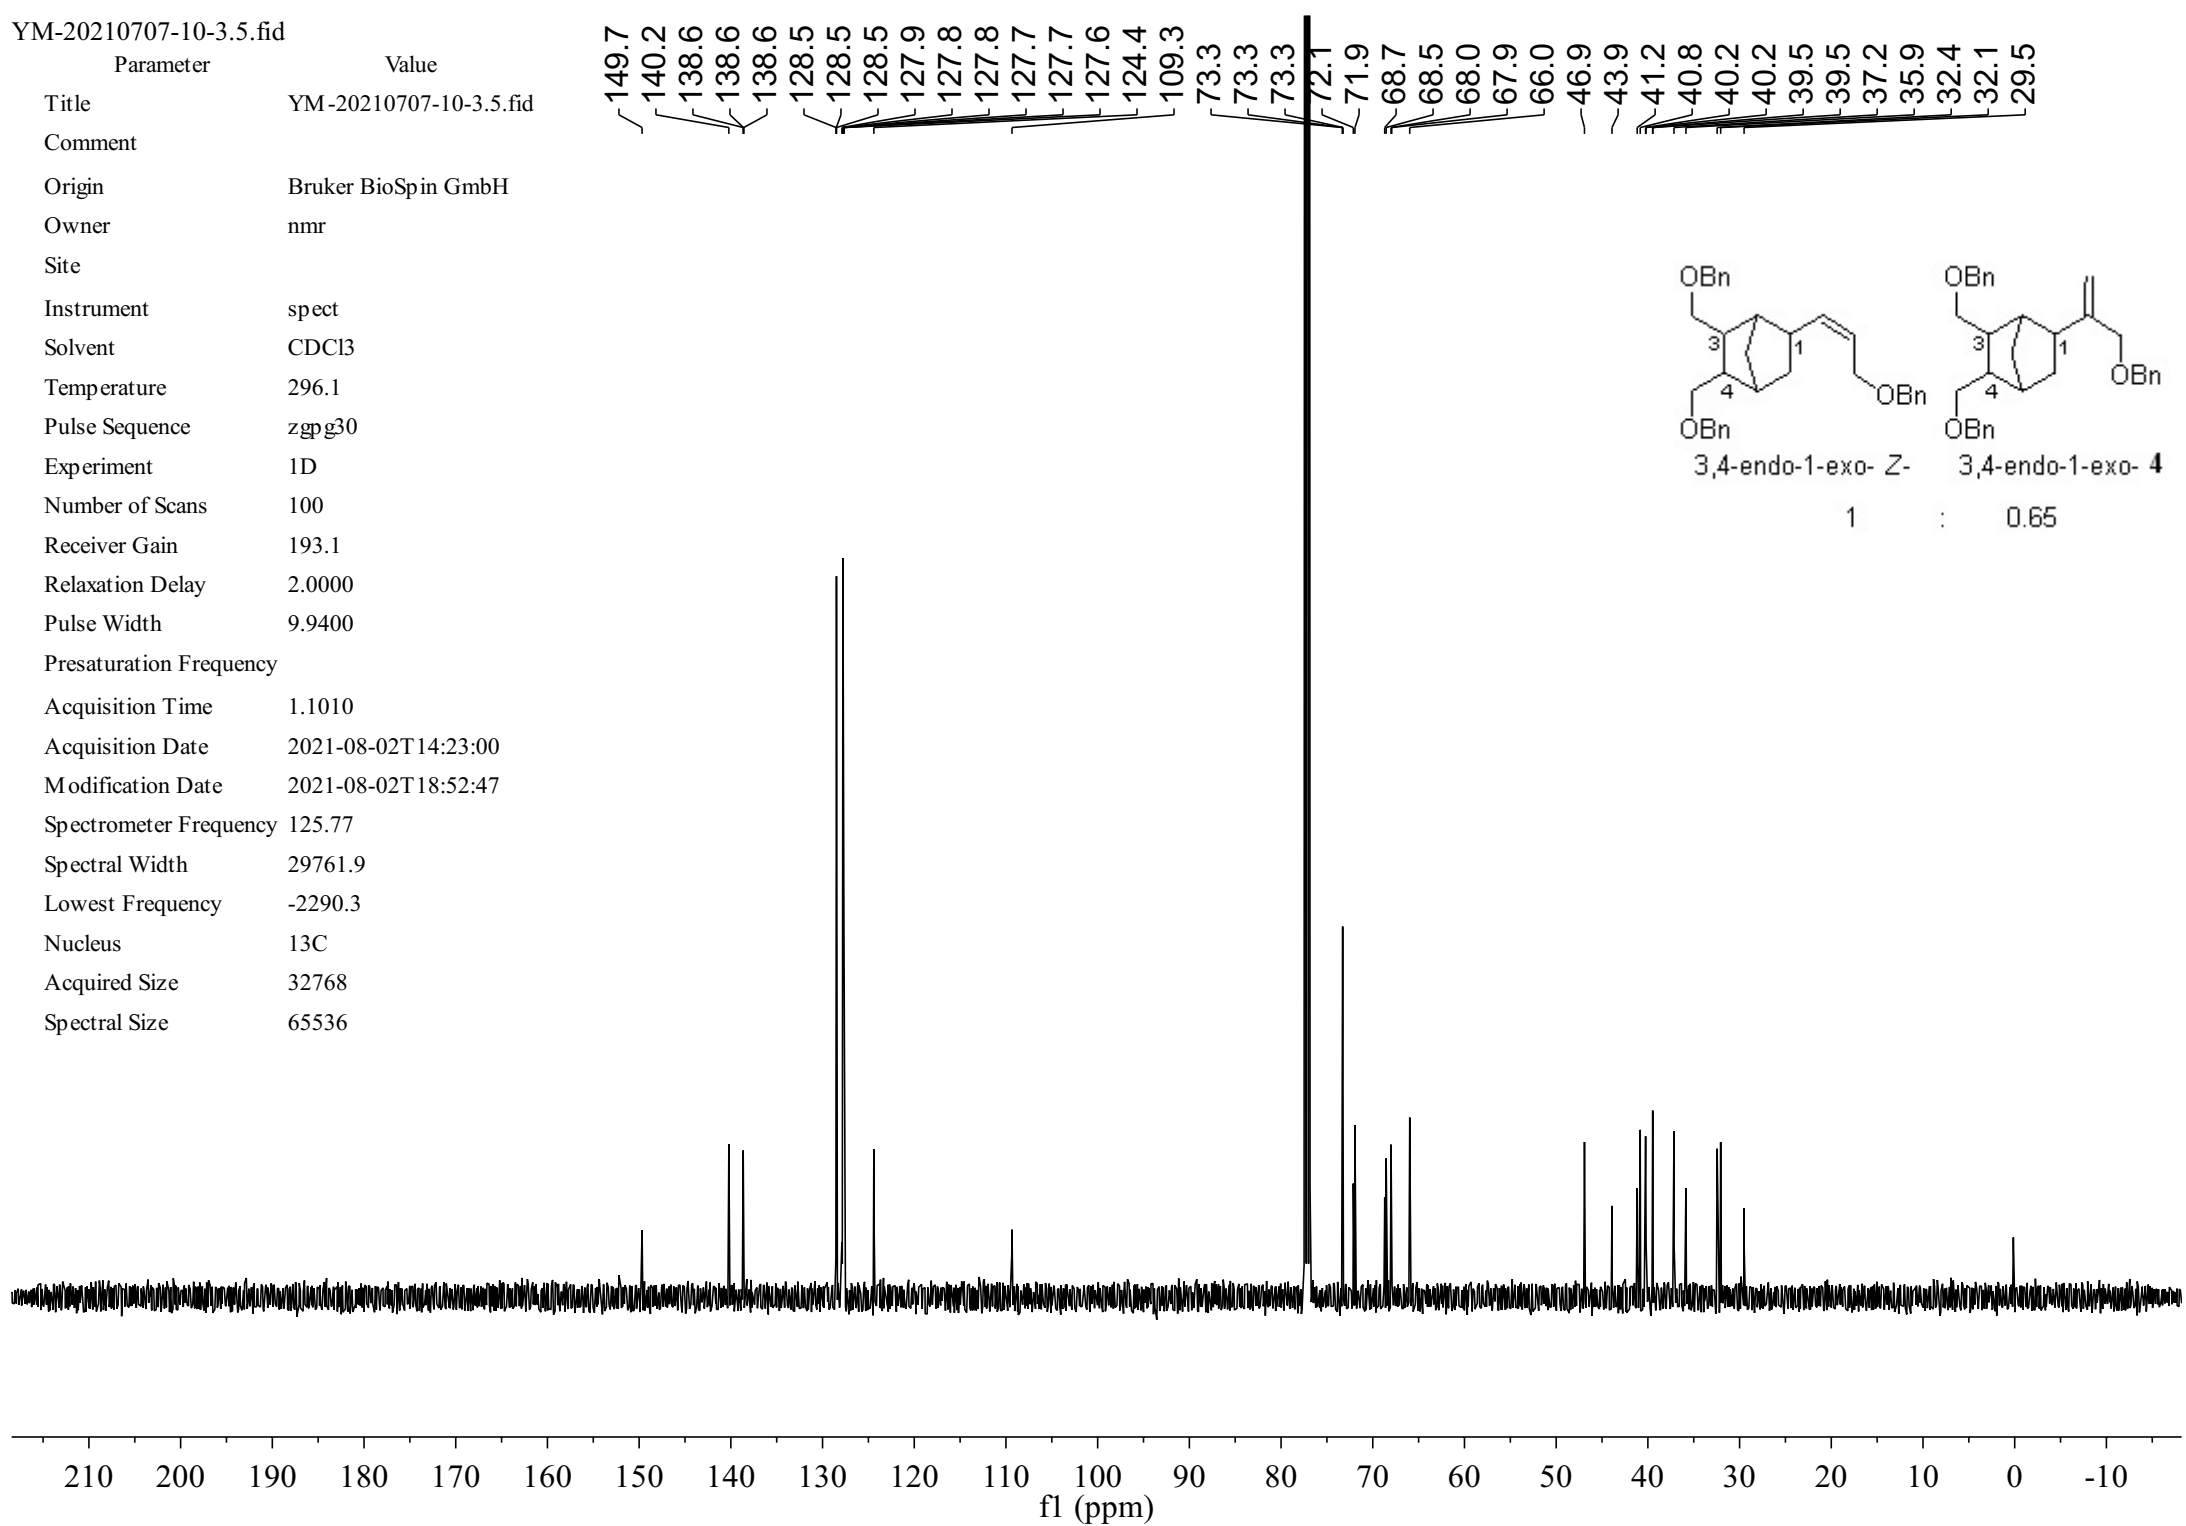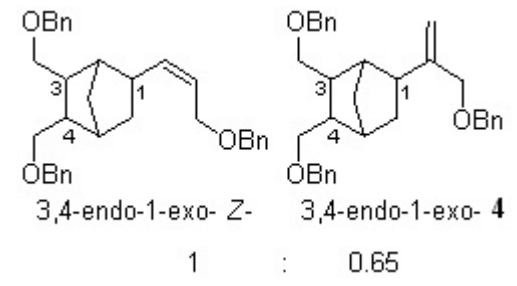



Cross hydroalkenylation Major Products in Table 3

YM-20240626-1.1.fid  
gx 26-27

| Parameter               | Value               |
|-------------------------|---------------------|
| Title                   | YM-20240626-1.1.fid |
| Comment                 | gx 26-27            |
| Origin                  | Bruker BioSpin GmbH |
| Owner                   | nmrsu               |
| Site                    |                     |
| Instrument              | Avance NEO 400      |
| Solvent                 | CDCl3               |
| Temperature             | 300.8               |
| Pulse Sequence          | zg30                |
| Experiment              | 1D                  |
| Number of Scans         | 8                   |
| Receiver Gain           | 101.0               |
| Relaxation Delay        | 1.0000              |
| Pulse Width             | 8.0000              |
| Presaturation Frequency |                     |
| Acquisition Time        | 3.9977              |
| Acquisition Date        | 2024-06-27T13:35:02 |
| Modification Date       | 2024-06-28T05:05:11 |
| Spectrometer Frequency  | 400.19              |
| Spectral Width          | 8196.7              |
| Lowest Frequency        | -1627.2             |
| Nucleus                 | 1H                  |
| Acquired Size           | 32768               |
| Spectral Size           | 65536               |

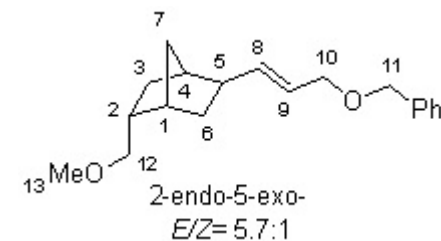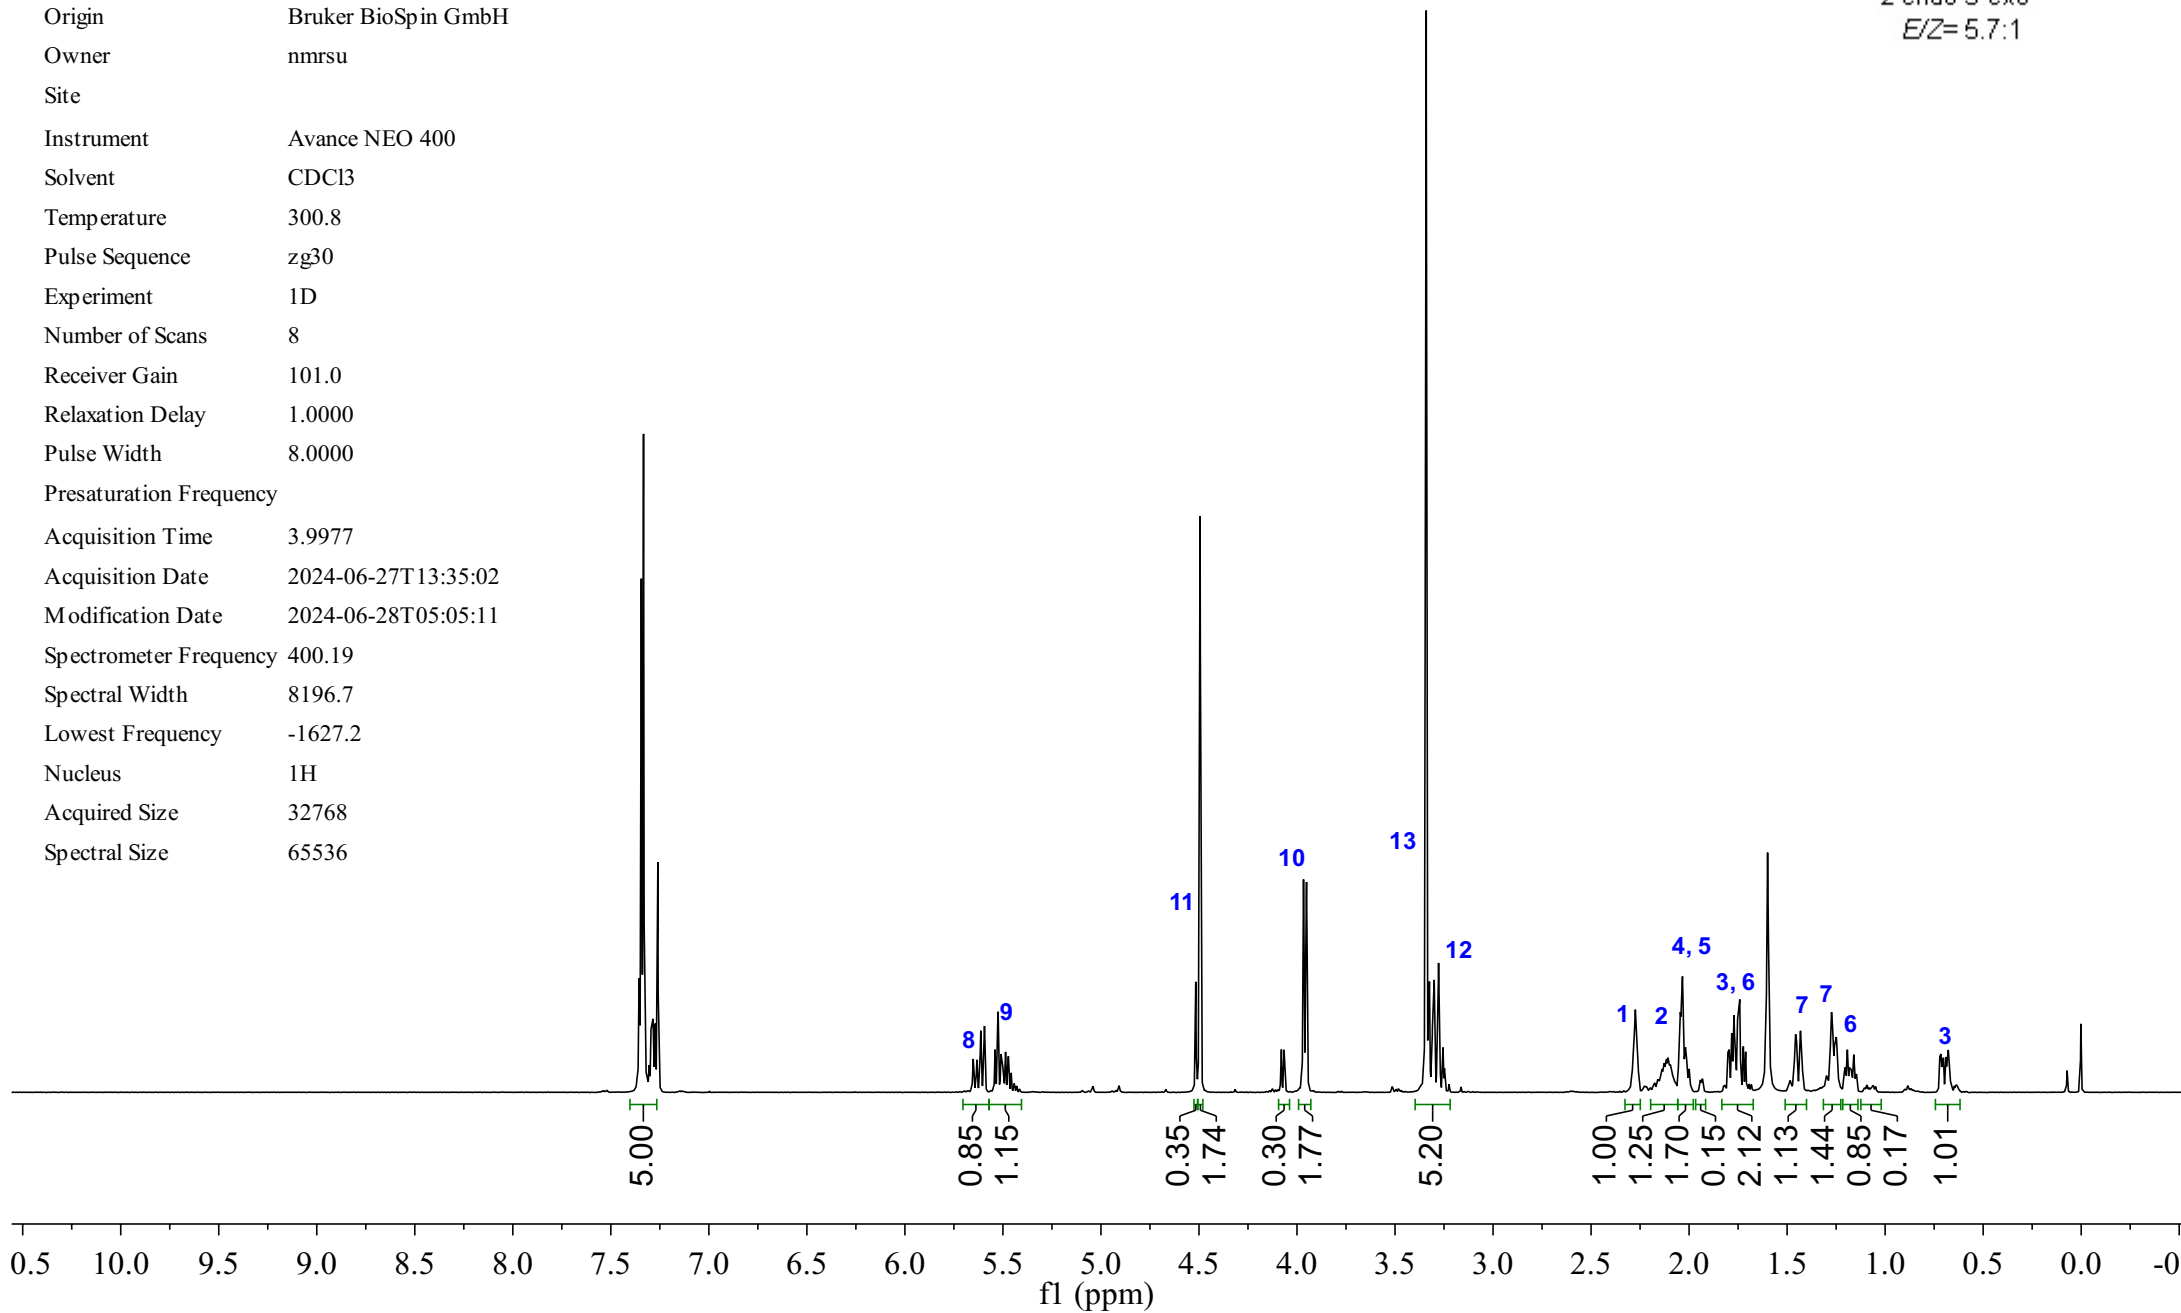

YM-20240626-1.2.fid  
CH2OMe+AOB

| Parameter               | Value               |
|-------------------------|---------------------|
| Title                   | YM-20240626-1.2.fid |
| Comment                 | CH2OMe+AOB          |
| Origin                  | Bruker BioSpin GmbH |
| Owner                   | nmr                 |
| Site                    |                     |
| Instrument              | spect               |
| Solvent                 | CDC13               |
| Temperature             | 296.2               |
| Pulse Sequence          | zgpg30              |
| Experiment              | 1D                  |
| Number of Scans         | 24                  |
| Receiver Gain           | 193.1               |
| Relaxation Delay        | 2.0000              |
| Pulse Width             | 9.9400              |
| Presaturation Frequency |                     |
| Acquisition Time        | 1.1010              |
| Acquisition Date        | 2024-06-28T01:00:46 |
| Modification Date       | 2024-06-28T05:05:11 |
| Spectrometer Frequency  | 125.77              |
| Spectral Width          | 29761.9             |
| Lowest Frequency        | -2305.8             |
| Nucleus                 | <sup>13</sup> C     |
| Acquired Size           | 32768               |
| Spectral Size           | 65536               |

140.1  
138.5  
128.5  
128.0  
127.7  
124.0  
75.1  
72.0  
71.1  
59.0  
45.1  
42.9  
39.1  
38.8  
37.3  
34.1  
30.9

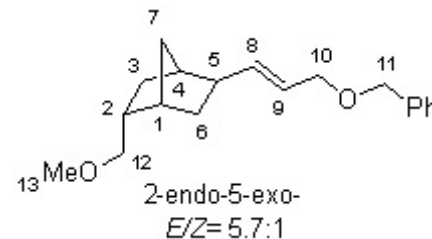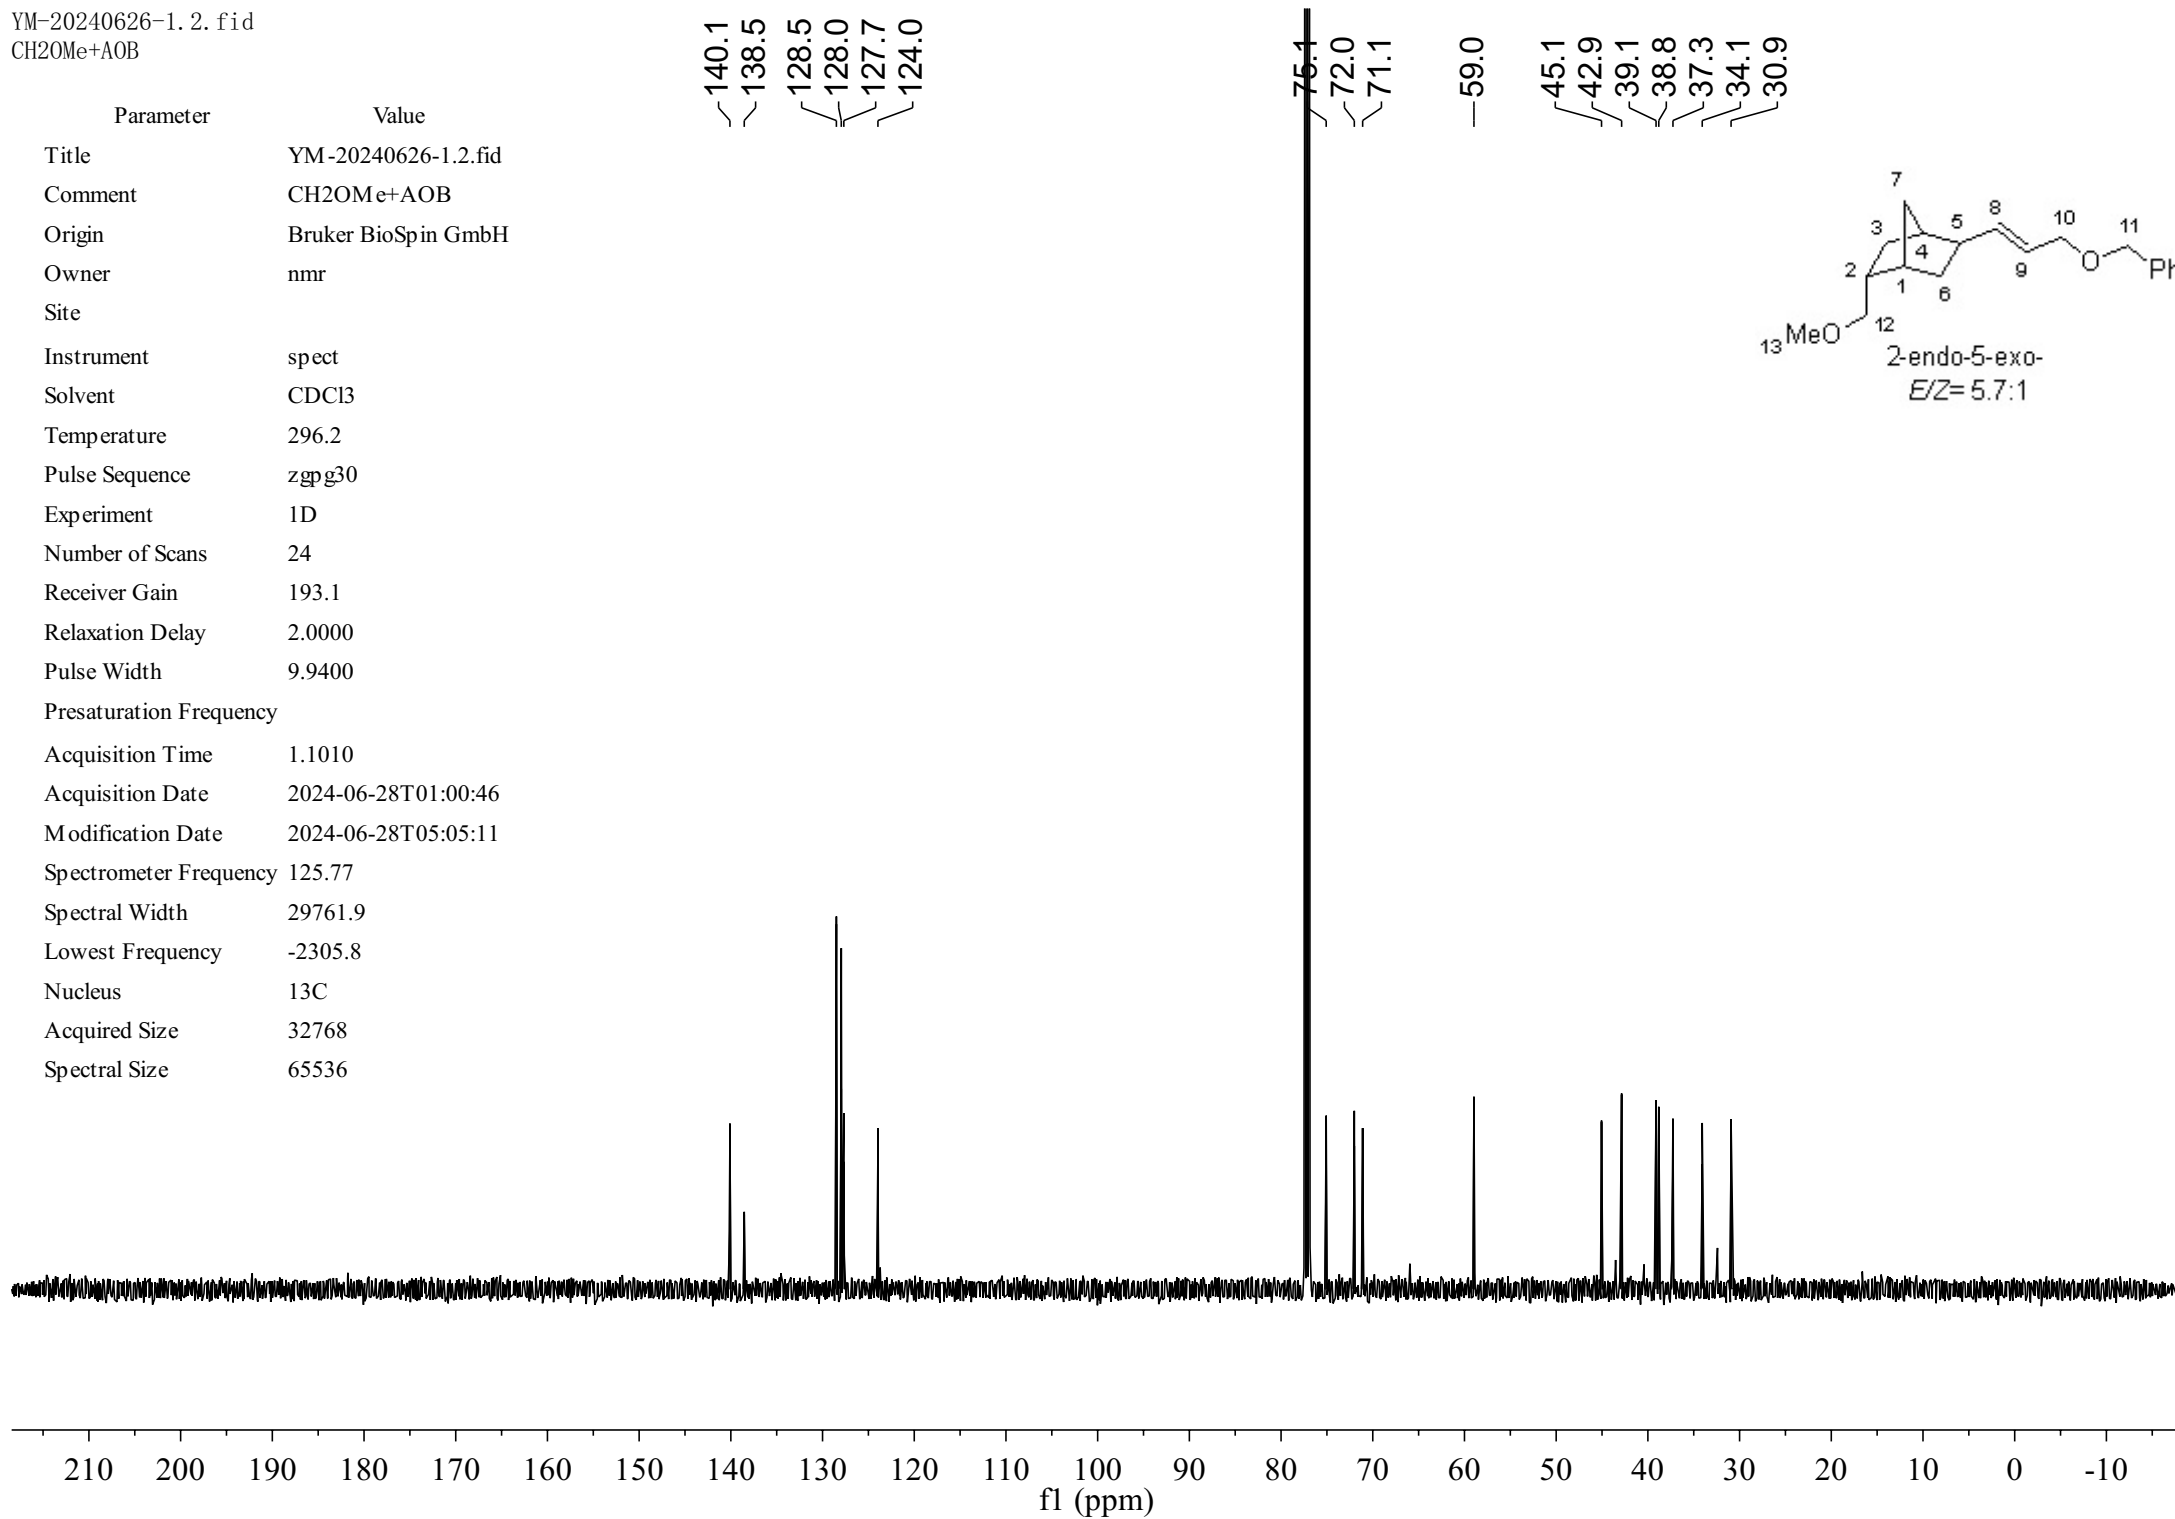

YM-20240626-1.3.fid

| Parameter               | Value               |
|-------------------------|---------------------|
| Title                   | YM-20240626-1.3.fid |
| Comment                 | CH2OMe+AOB          |
| Origin                  | Bruker BioSpin GmbH |
| Owner                   | nmr                 |
| Site                    |                     |
| Instrument              | spect               |
| Solvent                 | CDC13               |
| Temperature             | 296.2               |
| Pulse Sequence          | depts135            |
| Experiment              | DEPT-135            |
| Number of Scans         | 19                  |
| Receiver Gain           | 193.1               |
| Relaxation Delay        | 2.0000              |
| Pulse Width             | 9.9400              |
| Presaturation Frequency |                     |
| Acquisition Time        | 1.0486              |
| Acquisition Date        | 2024-06-28T01:03:07 |
| Modification Date       | 2024-06-28T05:05:12 |
| Spectrometer Frequency  | 125.77              |
| Spectral Width          | 31250.0             |
| Lowest Frequency        | -534.1              |
| Nucleus                 | <sup>13</sup> C     |
| Acquired Size           | 32768               |
| Spectral Size           | 65536               |

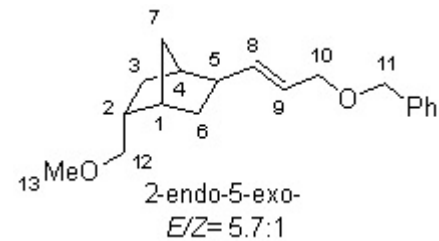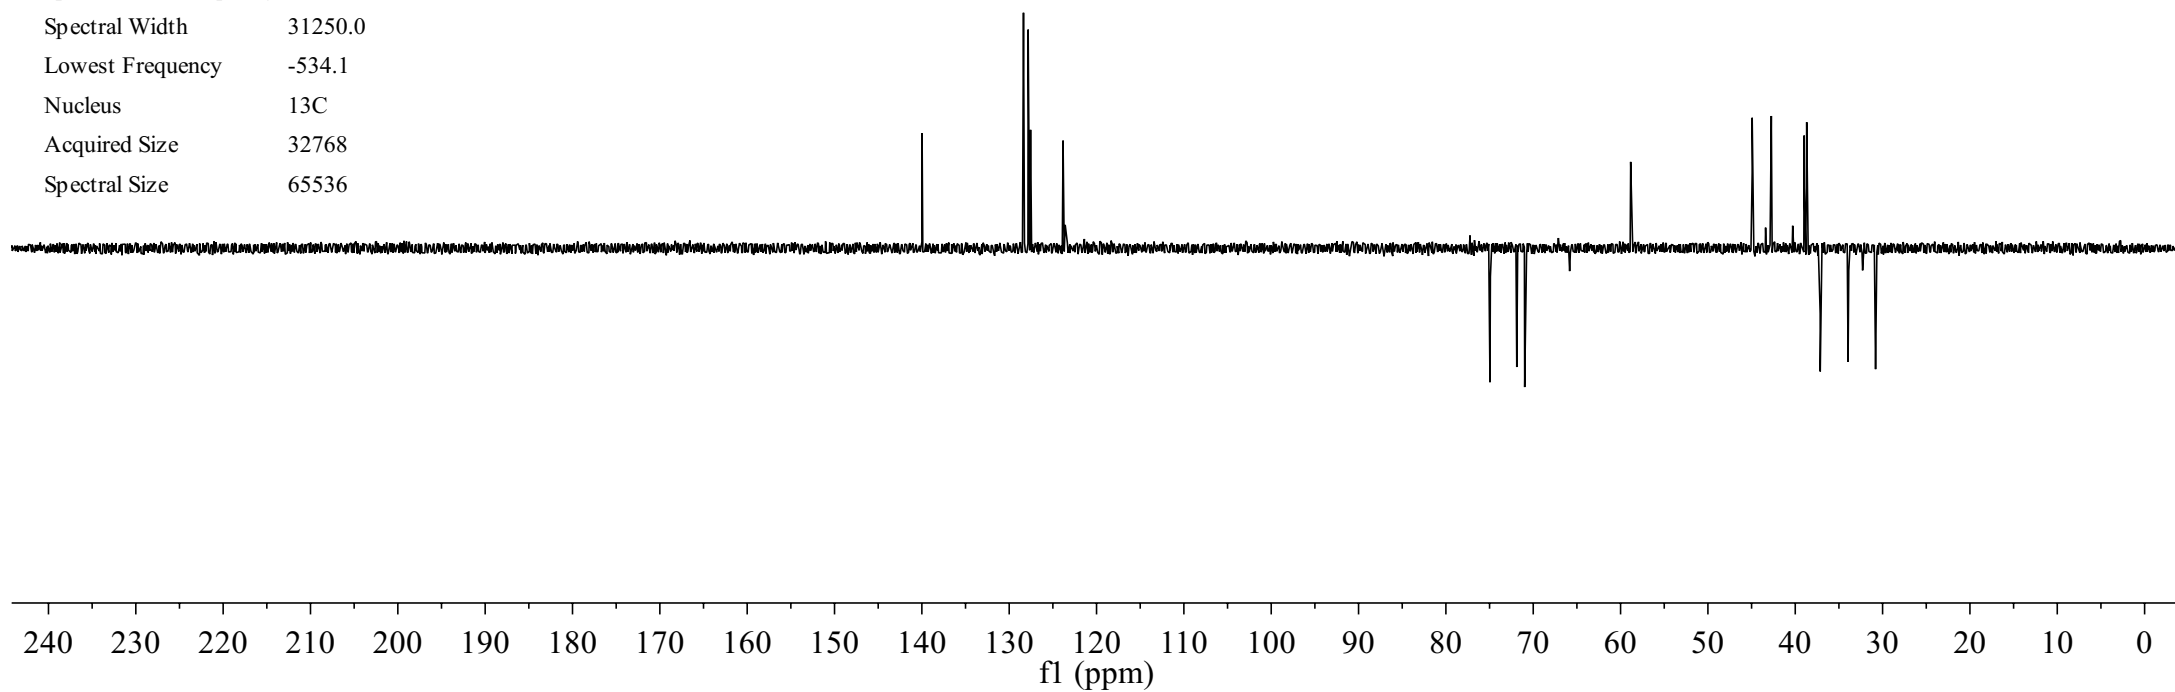

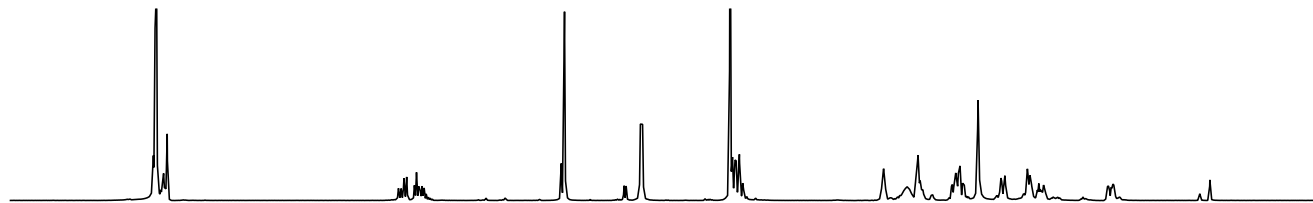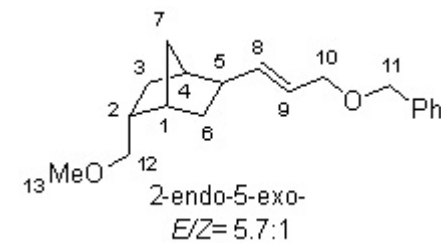

YM-20240626-1.13.ser

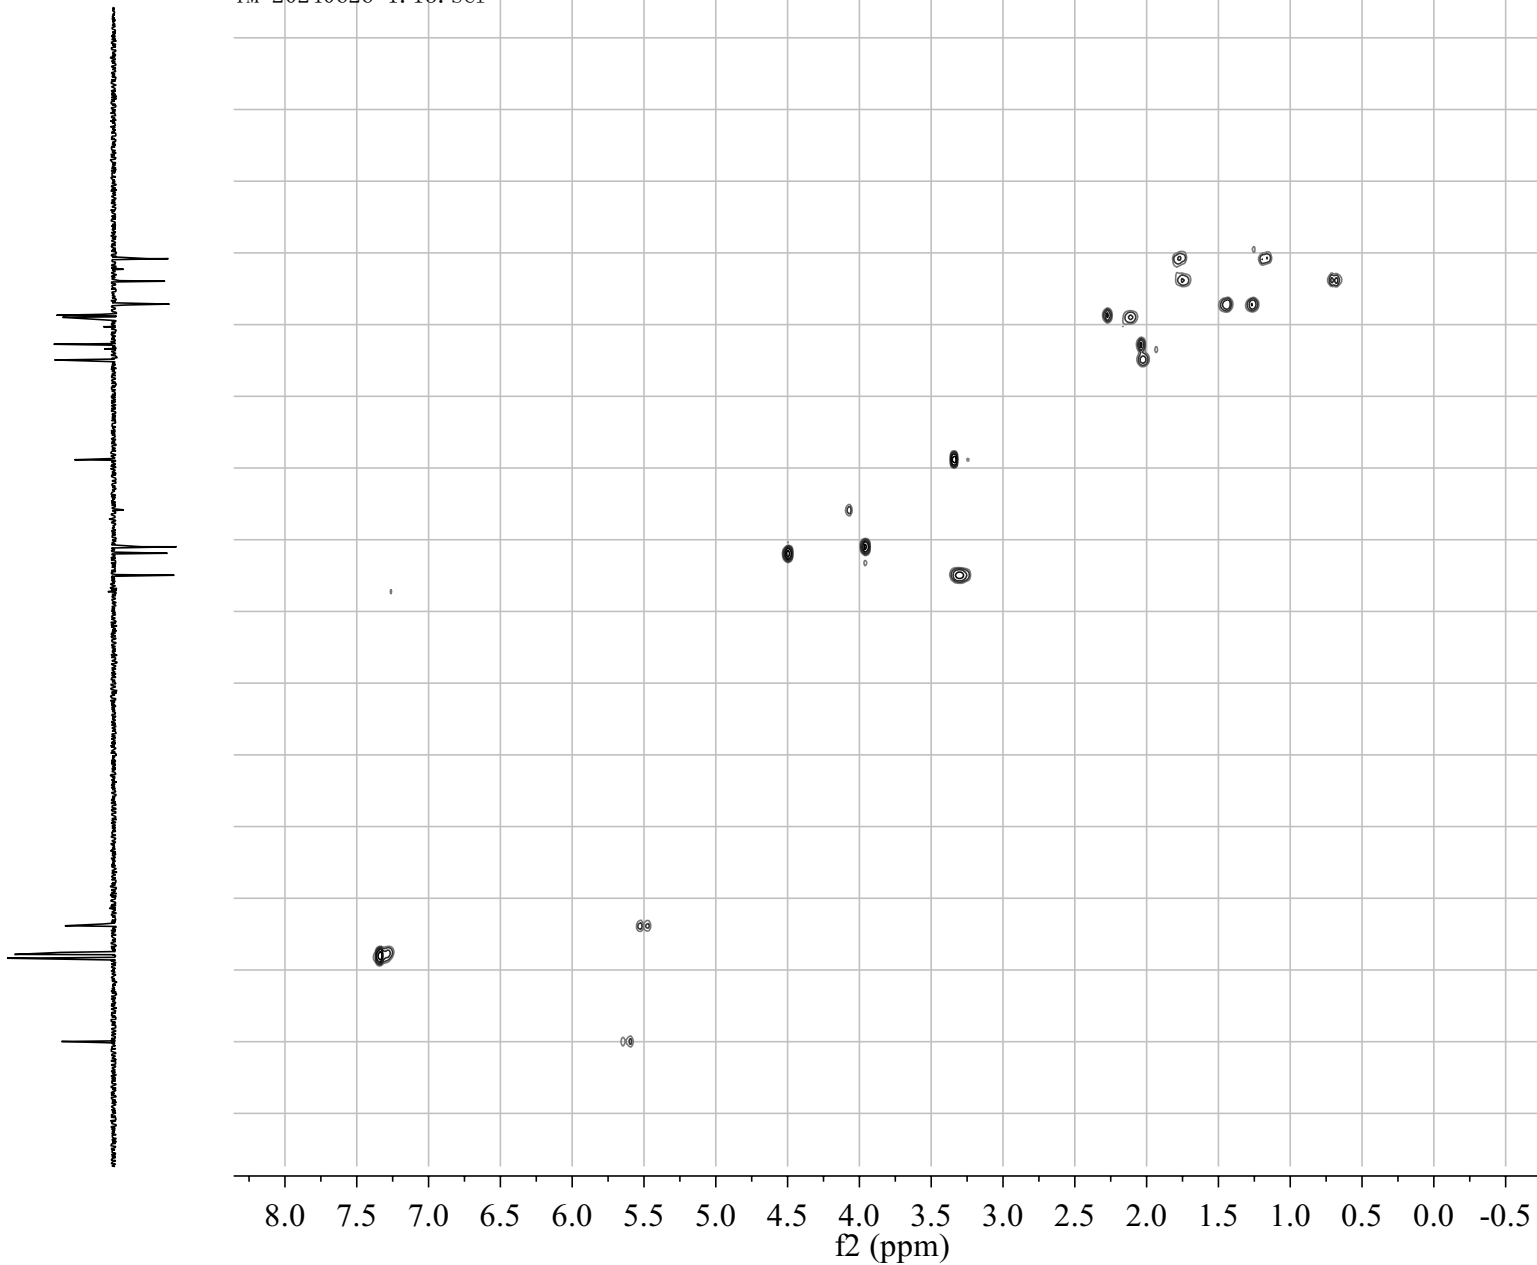

| Parameter               | Value                              |
|-------------------------|------------------------------------|
| Title                   | YM-20240626-1.13.ser               |
| Comment                 |                                    |
| Origin                  | Bruker BioSpin GmbH                |
| Owner                   | PC                                 |
| Site                    |                                    |
| Instrument              | spect                              |
| Solvent                 | CDCl <sub>3</sub>                  |
| Temperature             | 297.1                              |
| Pulse Sequence          | hsqcetgp                           |
| Experiment              | HSQC                               |
| Number of Scans         | 2                                  |
| Receiver Gain           | 196.4                              |
| Relaxation Delay        | 1.4592                             |
| Pulse Width             | 9.2600                             |
| Presaturation Frequency |                                    |
| Acquisition Time        | 0.1393                             |
| Acquisition Date        | 2024-06-28T12:33:32                |
| Modification Date       | 2024-06-28T13:53:56                |
| Spectrometer Frequency  | (400.13, 100.62)                   |
| Spectral Width          | (3676.5, 16666.7)                  |
| Lowest Frequency        | (-332.5, -829.1)                   |
| Nucleus                 | ( <sup>1</sup> H, <sup>13</sup> C) |
| Acquired Size           | (512, 256)                         |
| Spectral Size           | (512, 512)                         |

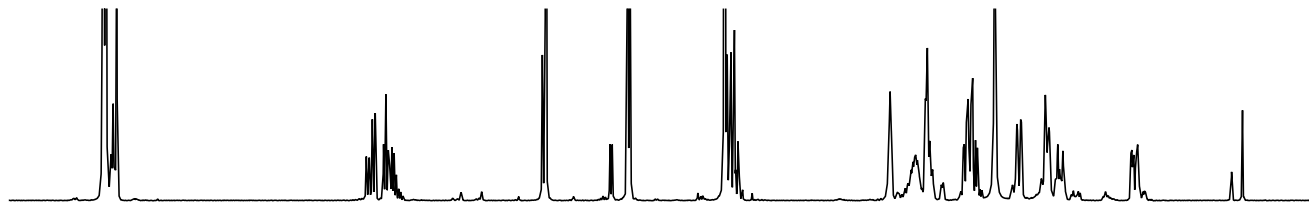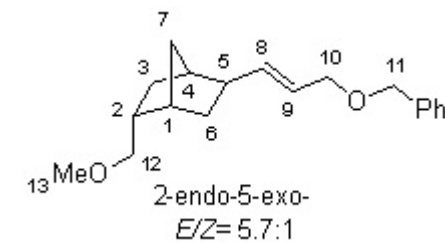

YM-20240626-1.4.ser  
CH2OMe+AOB

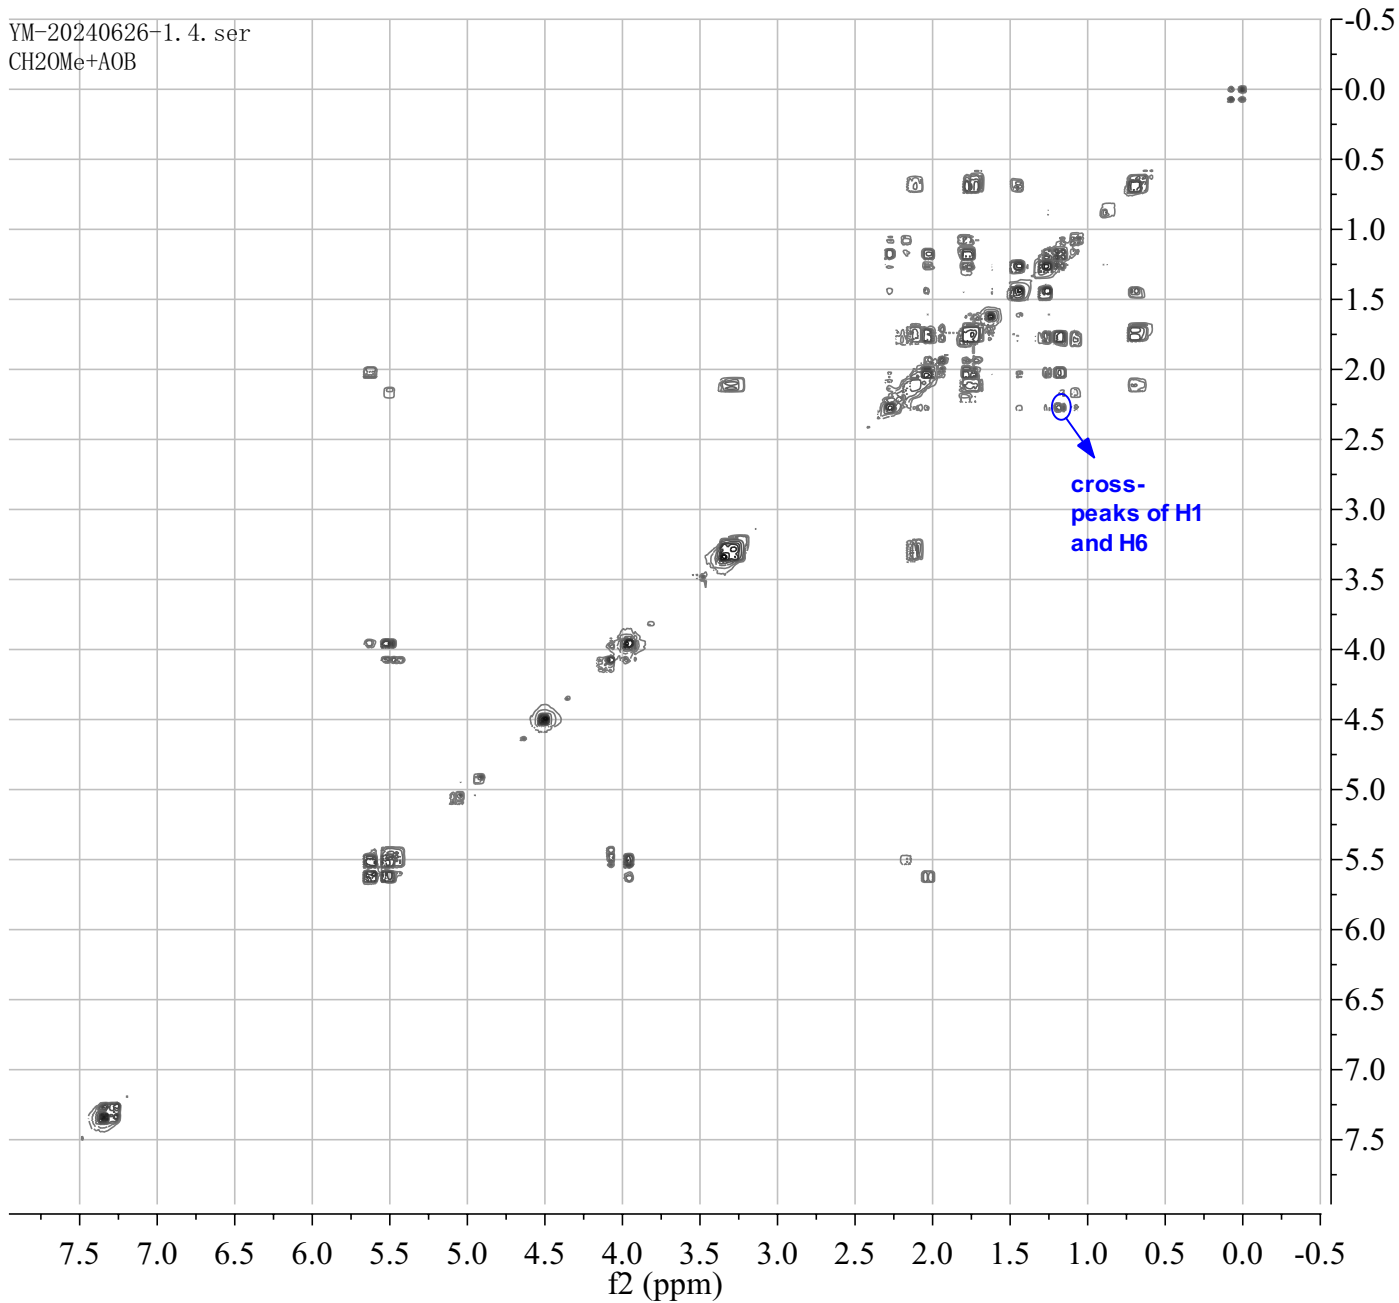

| Parameter               | Value               |
|-------------------------|---------------------|
| Title                   | YM-20240626-1.4.ser |
| Comment                 | CH2OMe+AOB          |
| Origin                  | Bruker BioSpin GmbH |
| Owner                   | nmr                 |
| Site                    |                     |
| Instrument              | spect               |
| Solvent                 | CDCl3               |
| Temperature             | 296.2               |
| Pulse Sequence          | cosygpppqf          |
| Experiment              | COSY                |
| Number of Scans         | 1                   |
| Receiver Gain           | 48.5                |
| Relaxation Delay        | 1.9115              |
| Pulse Width             | 11.3200             |
| Presaturation Frequency |                     |
| Acquisition Time        | 0.2417              |
| Acquisition Date        | 2024-06-28T01:05:07 |
| Modification Date       | 2024-06-28T05:05:12 |
| Spectrometer Frequency  | (500.13, 500.13)    |
| Spectral Width          | (4237.3, 4237.3)    |
| Lowest Frequency        | (-247.6, -247.6)    |
| Nucleus                 | (1H, 1H)            |
| Acquired Size           | (1024, 128)         |
| Spectral Size           | (1024, 1024)        |

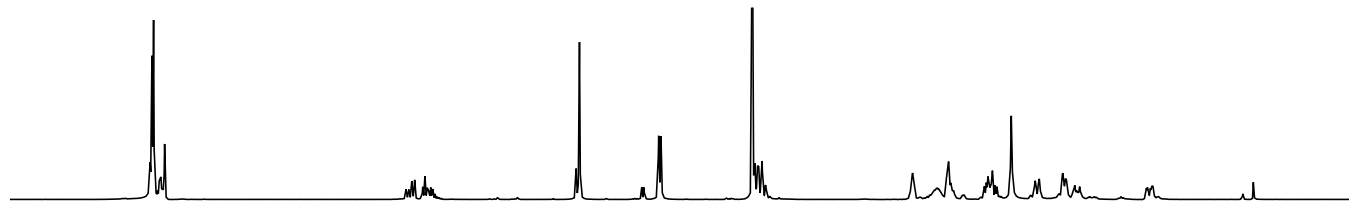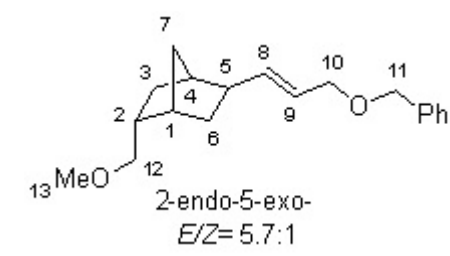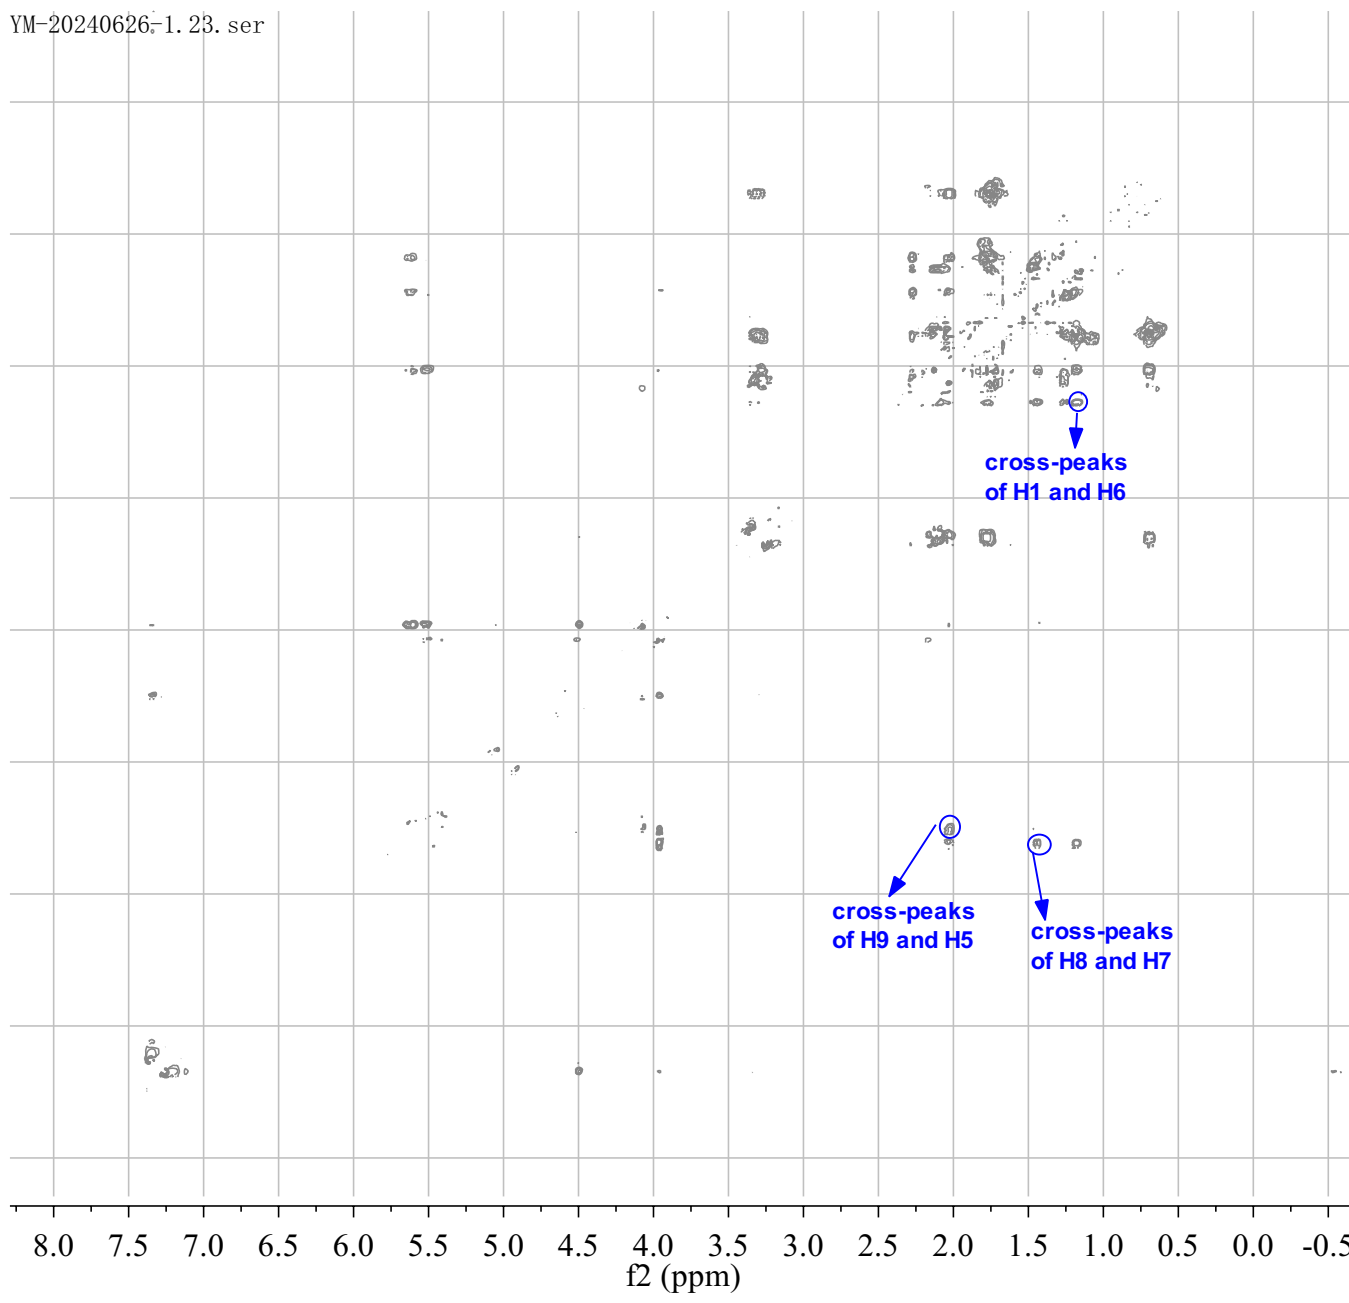

| Parameter               | Value                |
|-------------------------|----------------------|
| Title                   | YM-20240626-1.23.ser |
| Comment                 |                      |
| Origin                  | Bruker BioSpin GmbH  |
| Owner                   | PC                   |
| Site                    |                      |
| Instrument              | spect                |
| Solvent                 | CDCl3                |
| Temperature             | 296.8                |
| Pulse Sequence          | noesygp.php          |
| Experiment              | NOESY                |
| Number of Scans         | 4                    |
| Receiver Gain           | 31.7                 |
| Relaxation Delay        | 1.9713               |
| Pulse Width             | 9.2600               |
| Presaturation Frequency |                      |
| Acquisition Time        | 0.2847               |
| Acquisition Date        | 2024-06-29T18:59:32  |
| Modification Date       | 2024-06-29T20:23:38  |
| Spectrometer Frequency  | (400.13, 400.13)     |
| Spectral Width          | (3597.1, 3597.1)     |
| Lowest Frequency        | (-279.4, -279.4)     |
| Nucleus                 | (1H, 1H)             |
| Acquired Size           | (1024, 256)          |
| Spectral Size           | (1024, 1024)         |

YM-20210807-1-3-s2.2.fid

| Parameter               | Value                    |
|-------------------------|--------------------------|
| Title                   | YM-20210807-1-3-s2.2.fid |
| Comment                 |                          |
| Origin                  | Bruker BioSpin GmbH      |
| Owner                   | nmr                      |
| Site                    |                          |
| Instrument              | spect                    |
| Solvent                 | CDC13                    |
| Temperature             | 296.1                    |
| Pulse Sequence          | zg30                     |
| Experiment              | 1D                       |
| Number of Scans         | 13                       |
| Receiver Gain           | 48.5                     |
| Relaxation Delay        | 1.0000                   |
| Pulse Width             | 11.3200                  |
| Presaturation Frequency |                          |
| Acquisition Time        | 3.2768                   |
| Acquisition Date        | 2021-08-09T13:24:00      |
| Modification Date       | 2021-08-09T17:00:07      |
| Spectrometer Frequency  | 500.13                   |
| Spectral Width          | 10000.0                  |
| Lowest Frequency        | -1923.5                  |
| Nucleus                 | 1H                       |
| Acquired Size           | 32768                    |
| Spectral Size           | 65536                    |

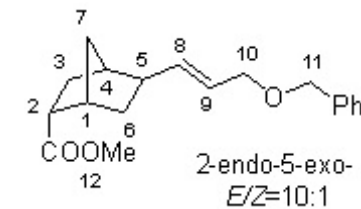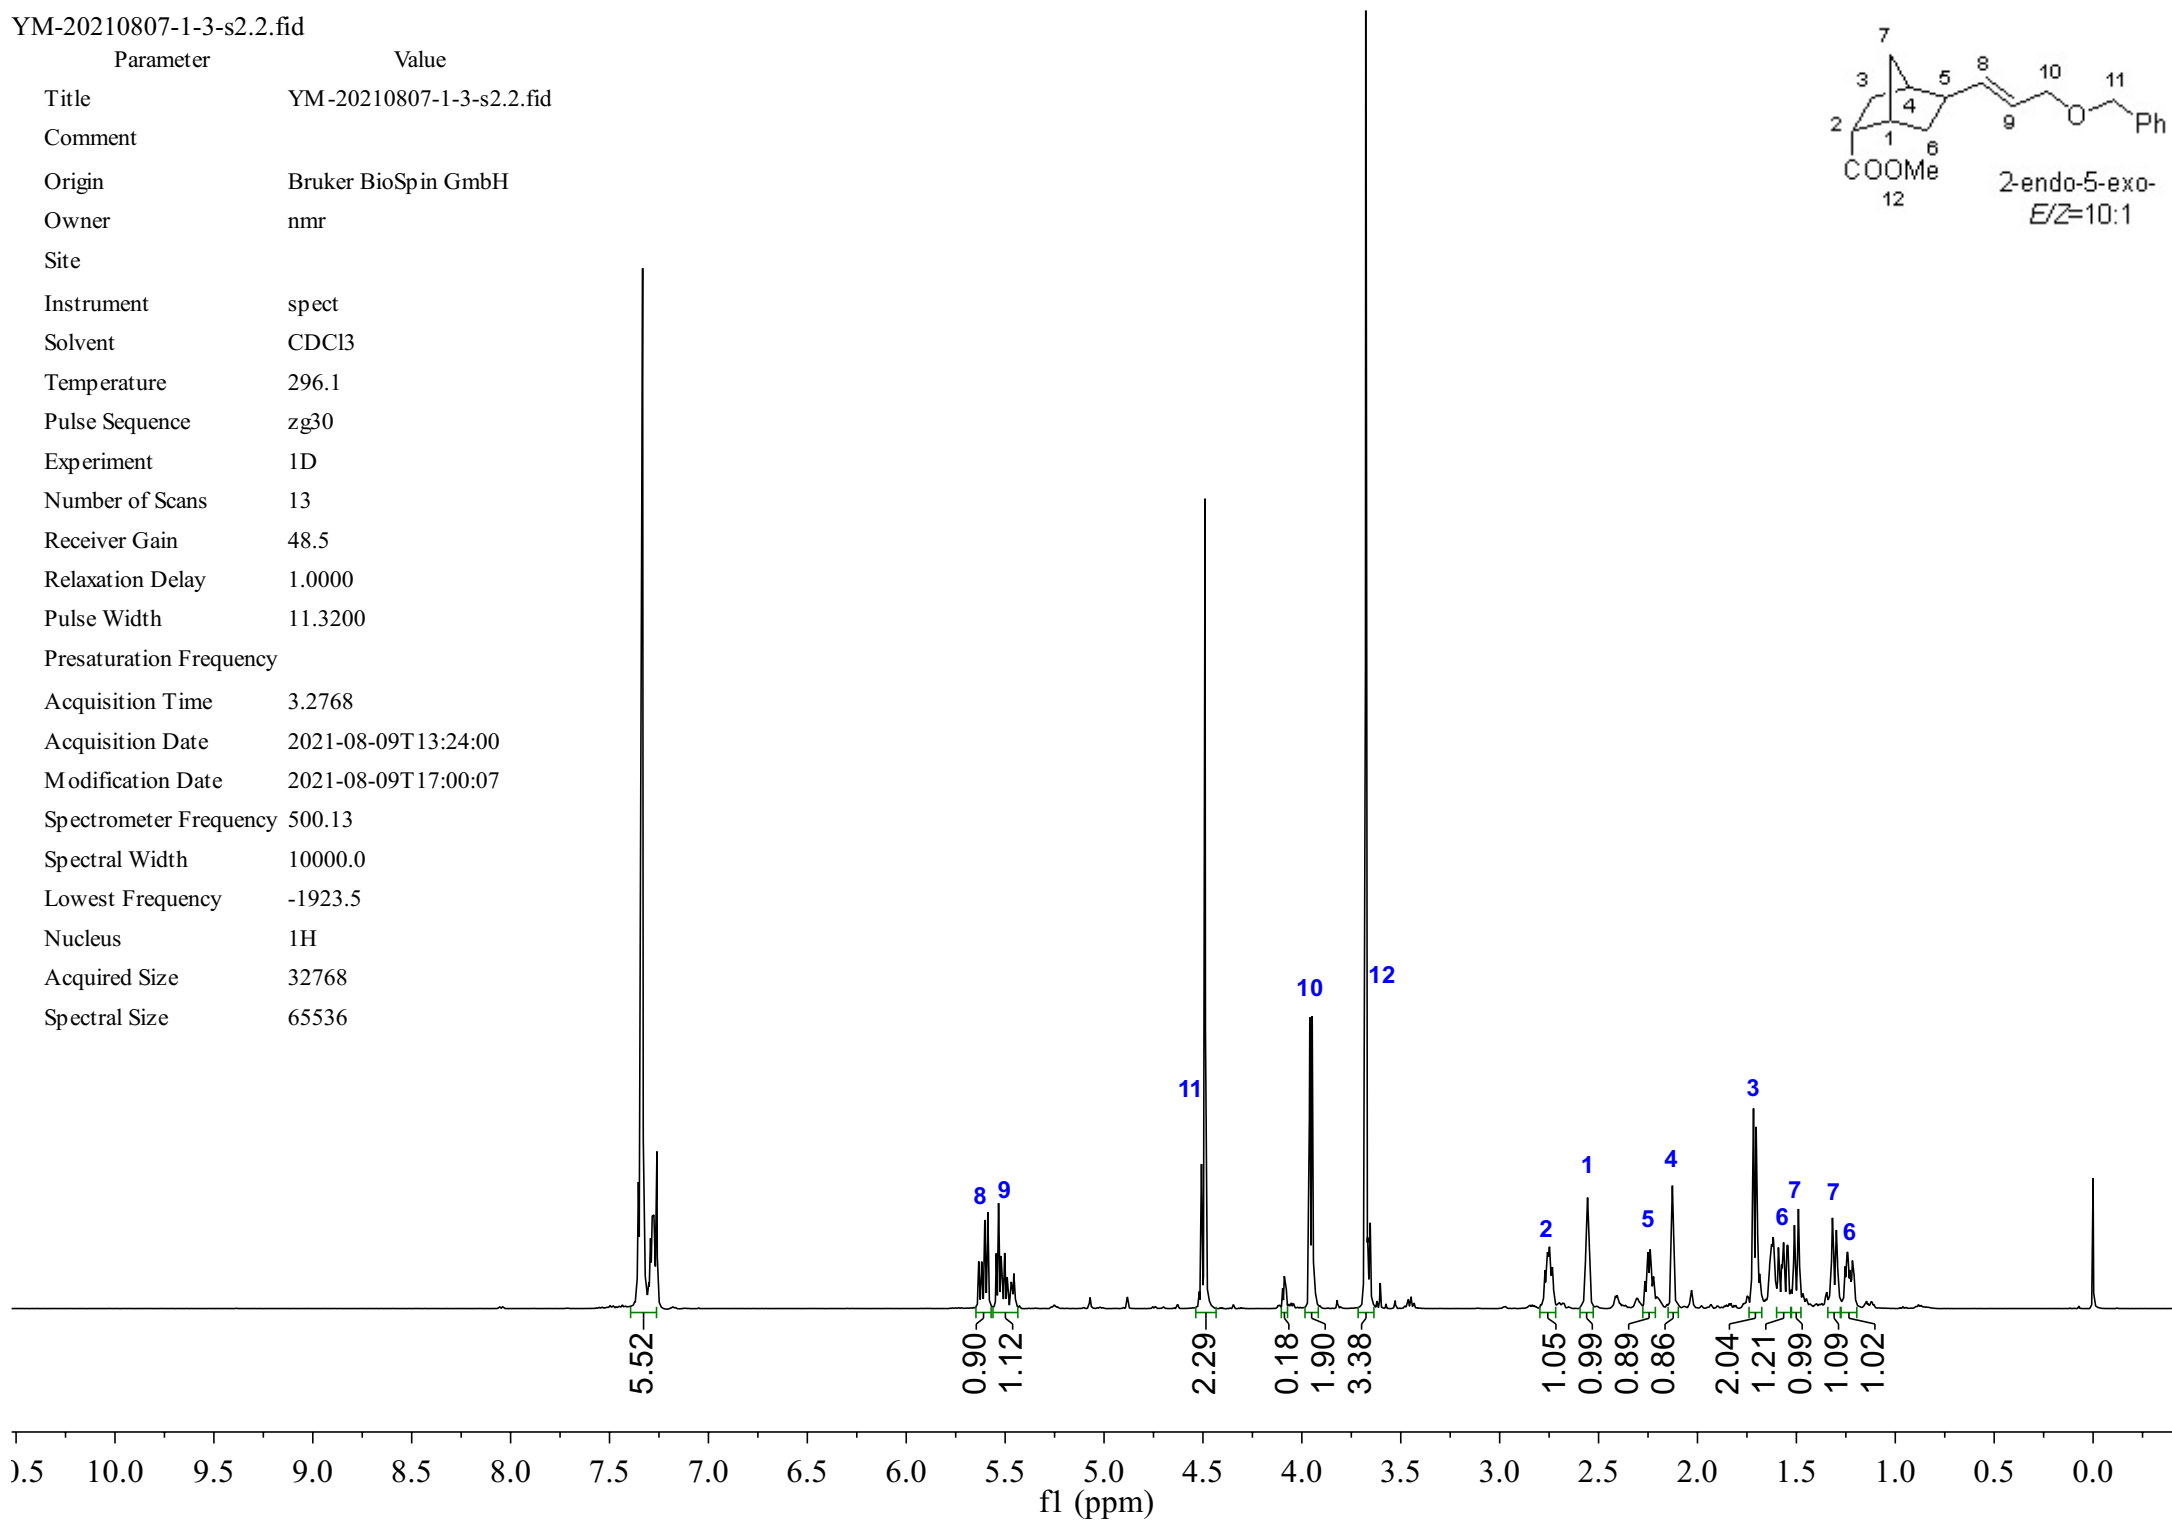



YM-210807-1-3.3.fid  
s2

—175.5

139.4  
138.5  
128.5  
127.9  
127.7  
124.3

72.0  
71.0

51.7  
45.3  
44.0  
43.0  
40.8  
37.6  
33.0  
32.2

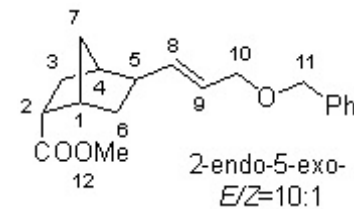

| Parameter               | Value               |
|-------------------------|---------------------|
| Title                   | YM-210807-1-3.3.fid |
| Comment                 | s2                  |
| Origin                  | Bruker BioSpin GmbH |
| Owner                   | PC                  |
| Site                    |                     |
| Instrument              | spect               |
| Solvent                 | CDC13               |
| Temperature             | 296.8               |
| Pulse Sequence          | zgpg30              |
| Experiment              | 1D                  |
| Number of Scans         | 108                 |
| Receiver Gain           | 196.4               |
| Relaxation Delay        | 2.0000              |
| Pulse Width             | 10.2200             |
| Presaturation Frequency |                     |
| Acquisition Time        | 1.3631              |
| Acquisition Date        | 2024-06-23T00:11:57 |
| Modification Date       | 2024-06-23T12:52:20 |
| Spectrometer Frequency  | 100.62              |
| Spectral Width          | 24038.5             |
| Lowest Frequency        | -1946.0             |
| Nucleus                 | <sup>13</sup> C     |
| Acquired Size           | 32768               |
| Spectral Size           | 65536               |

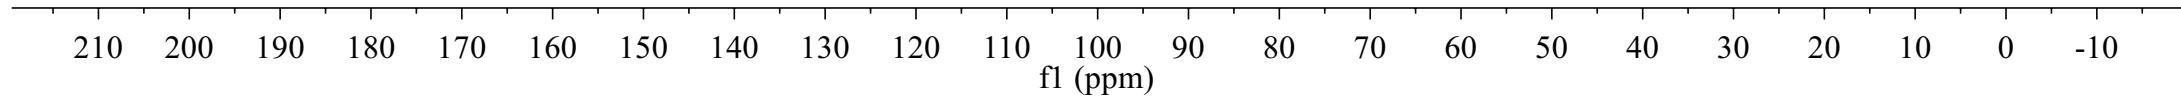

YM-210807-1-3.6.fid

| s2 | Parameter               | Value               |
|----|-------------------------|---------------------|
|    | Title                   | YM-210807-1-3.6.fid |
|    | Comment                 | s2                  |
|    | Origin                  | Bruker BioSpin GmbH |
|    | Owner                   | PC                  |
|    | Site                    |                     |
|    | Instrument              | spect               |
|    | Solvent                 | CDC13               |
|    | Temperature             | 296.9               |
|    | Pulse Sequence          | depts135            |
|    | Experiment              | DEPT-135            |
|    | Number of Scans         | 32                  |
|    | Receiver Gain           | 196.4               |
|    | Relaxation Delay        | 2.0000              |
|    | Pulse Width             | 10.2200             |
|    | Presaturation Frequency |                     |
|    | Acquisition Time        | 1.3631              |
|    | Acquisition Date        | 2024-06-23T12:09:04 |
|    | Modification Date       | 2024-06-23T12:52:23 |
|    | Spectrometer Frequency  | 100.62              |
|    | Spectral Width          | 24038.5             |
|    | Lowest Frequency        | -1958.0             |
|    | Nucleus                 | 13C                 |
|    | Acquired Size           | 32768               |
|    | Spectral Size           | 65536               |

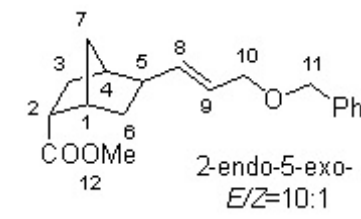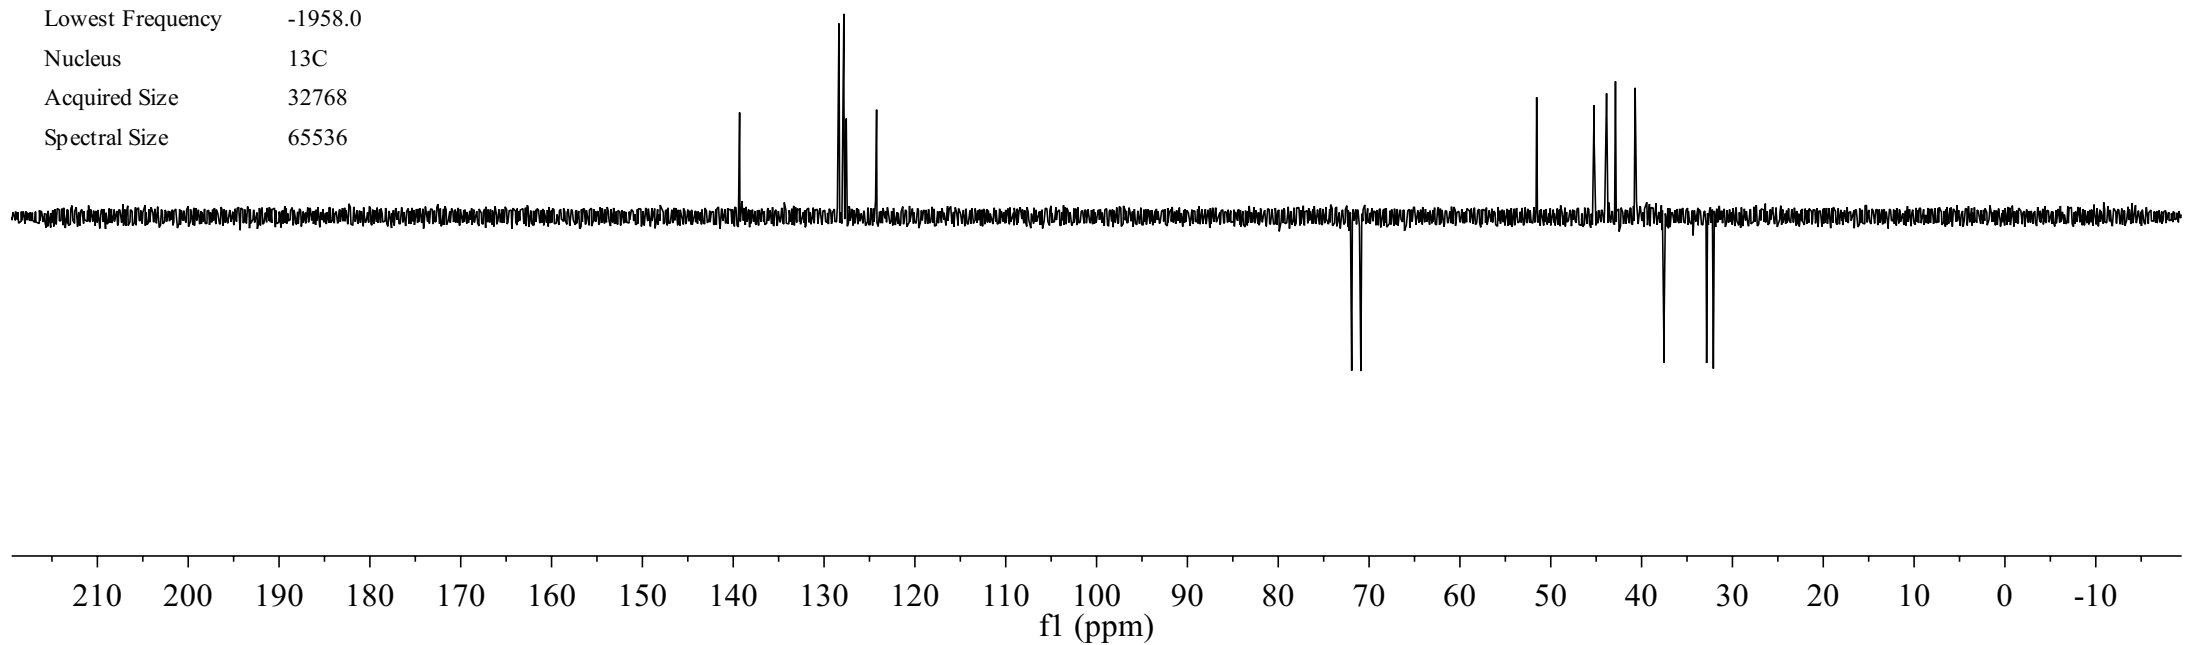

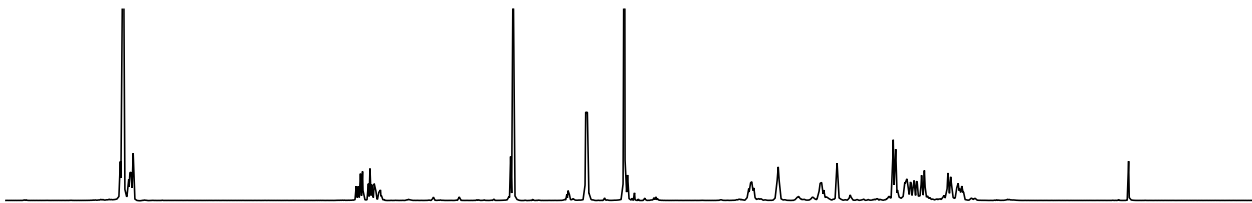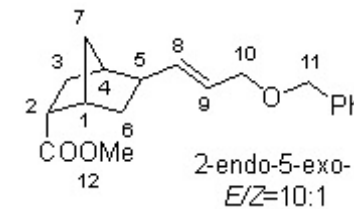

YM-210807-1-3.5.ser  
s2

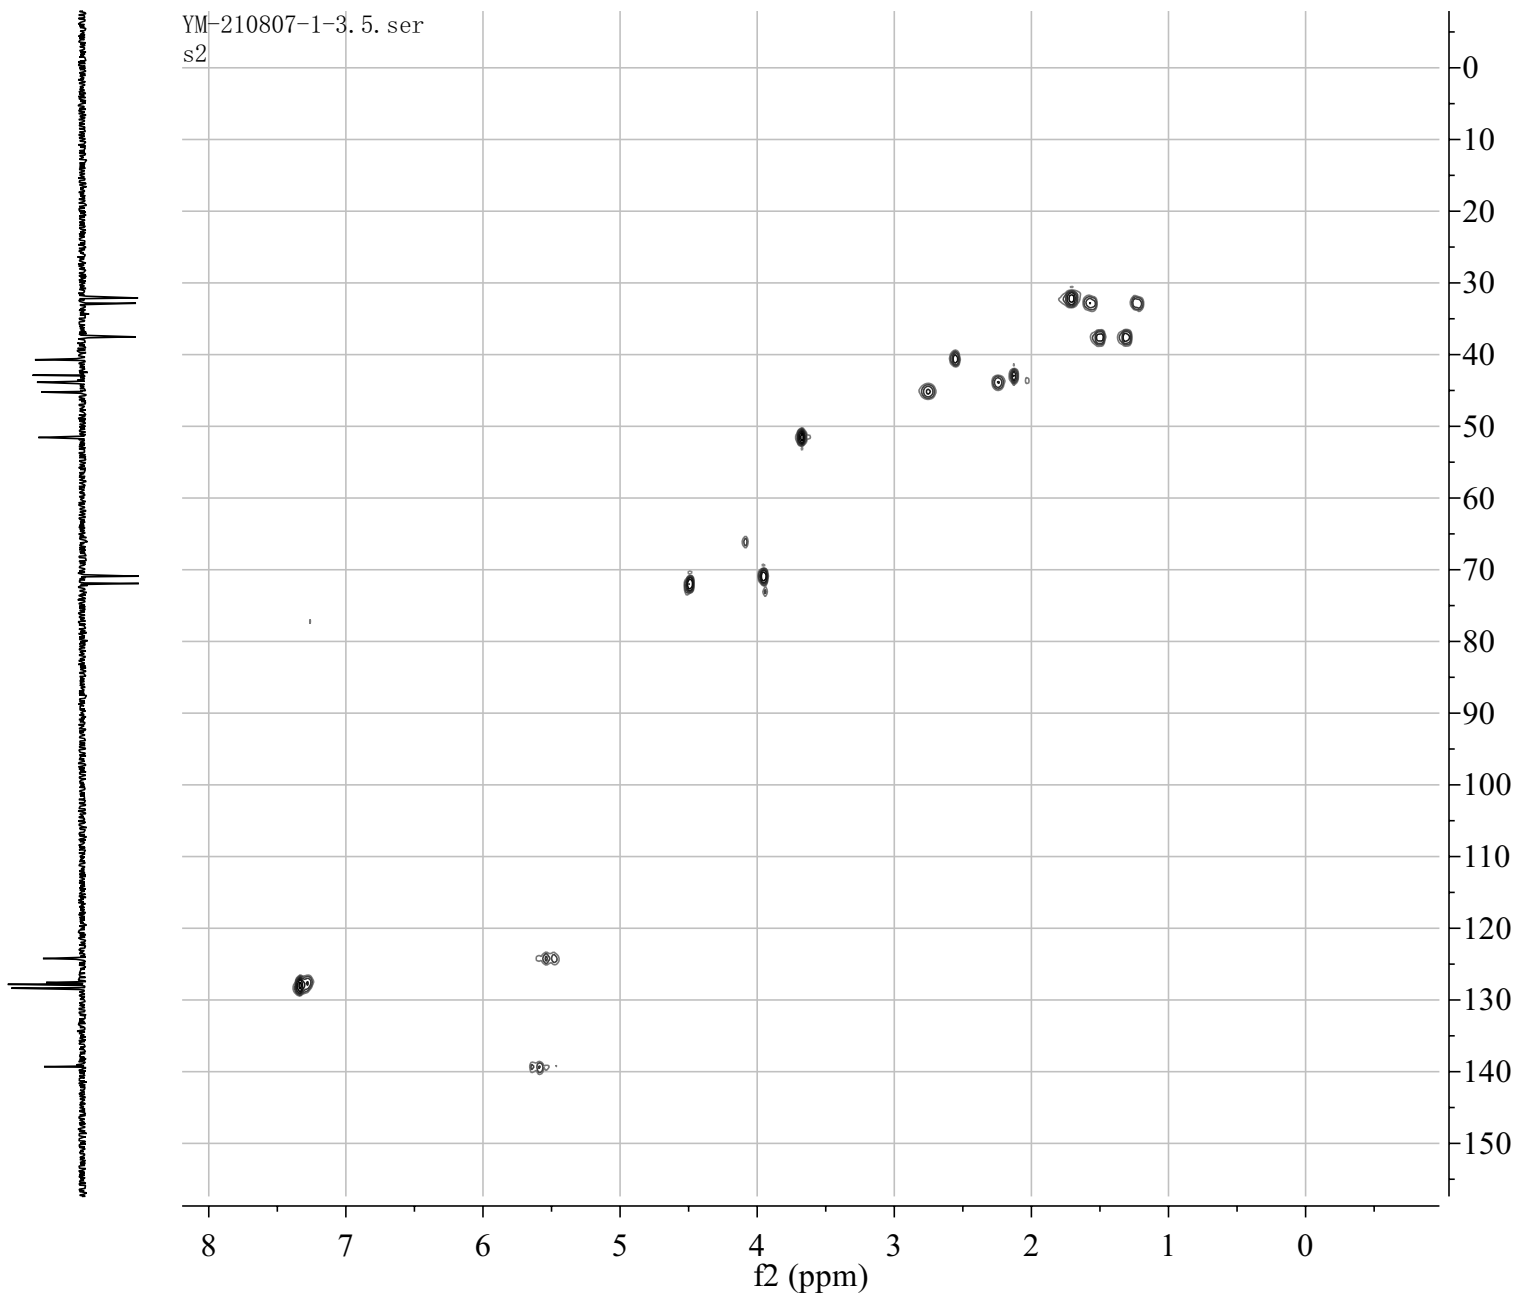

| Parameter               | Value               |
|-------------------------|---------------------|
| Title                   | YM-210807-1-3.5.ser |
| Comment                 | s2                  |
| Origin                  | Bruker BioSpin GmbH |
| Owner                   | PC                  |
| Site                    |                     |
| Instrument              | spect               |
| Solvent                 | CDCl3               |
| Temperature             | 296.9               |
| Pulse Sequence          | hsqcetgp            |
| Experiment              | HSQC                |
| Number of Scans         | 2                   |
| Receiver Gain           | 196.4               |
| Relaxation Delay        | 1.4592              |
| Pulse Width             | 9.2600              |
| Presaturation Frequency |                     |
| Acquisition Time        | 0.1393              |
| Acquisition Date        | 2024-06-23T00:19:12 |
| Modification Date       | 2024-06-23T12:52:20 |
| Spectrometer Frequency  | (400.13, 100.62)    |
| Spectral Width          | (3676.5, 16666.7)   |
| Lowest Frequency        | (-397.7, -829.1)    |
| Nucleus                 | (1H, 13C)           |
| Acquired Size           | (512, 256)          |
| Spectral Size           | (512, 512)          |

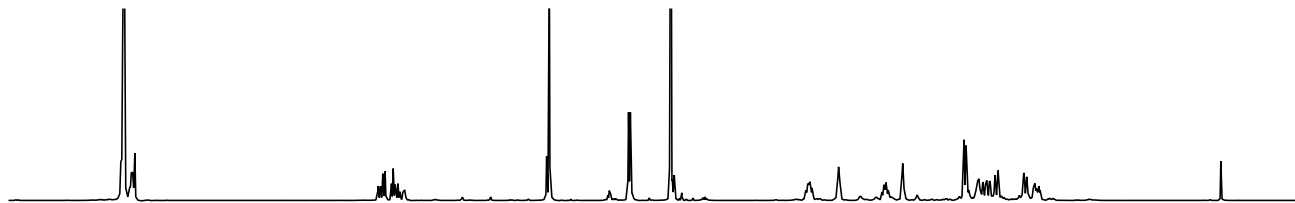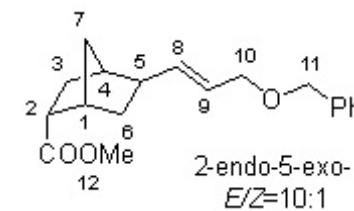

YM-20210807-1-3-s2.3.ser

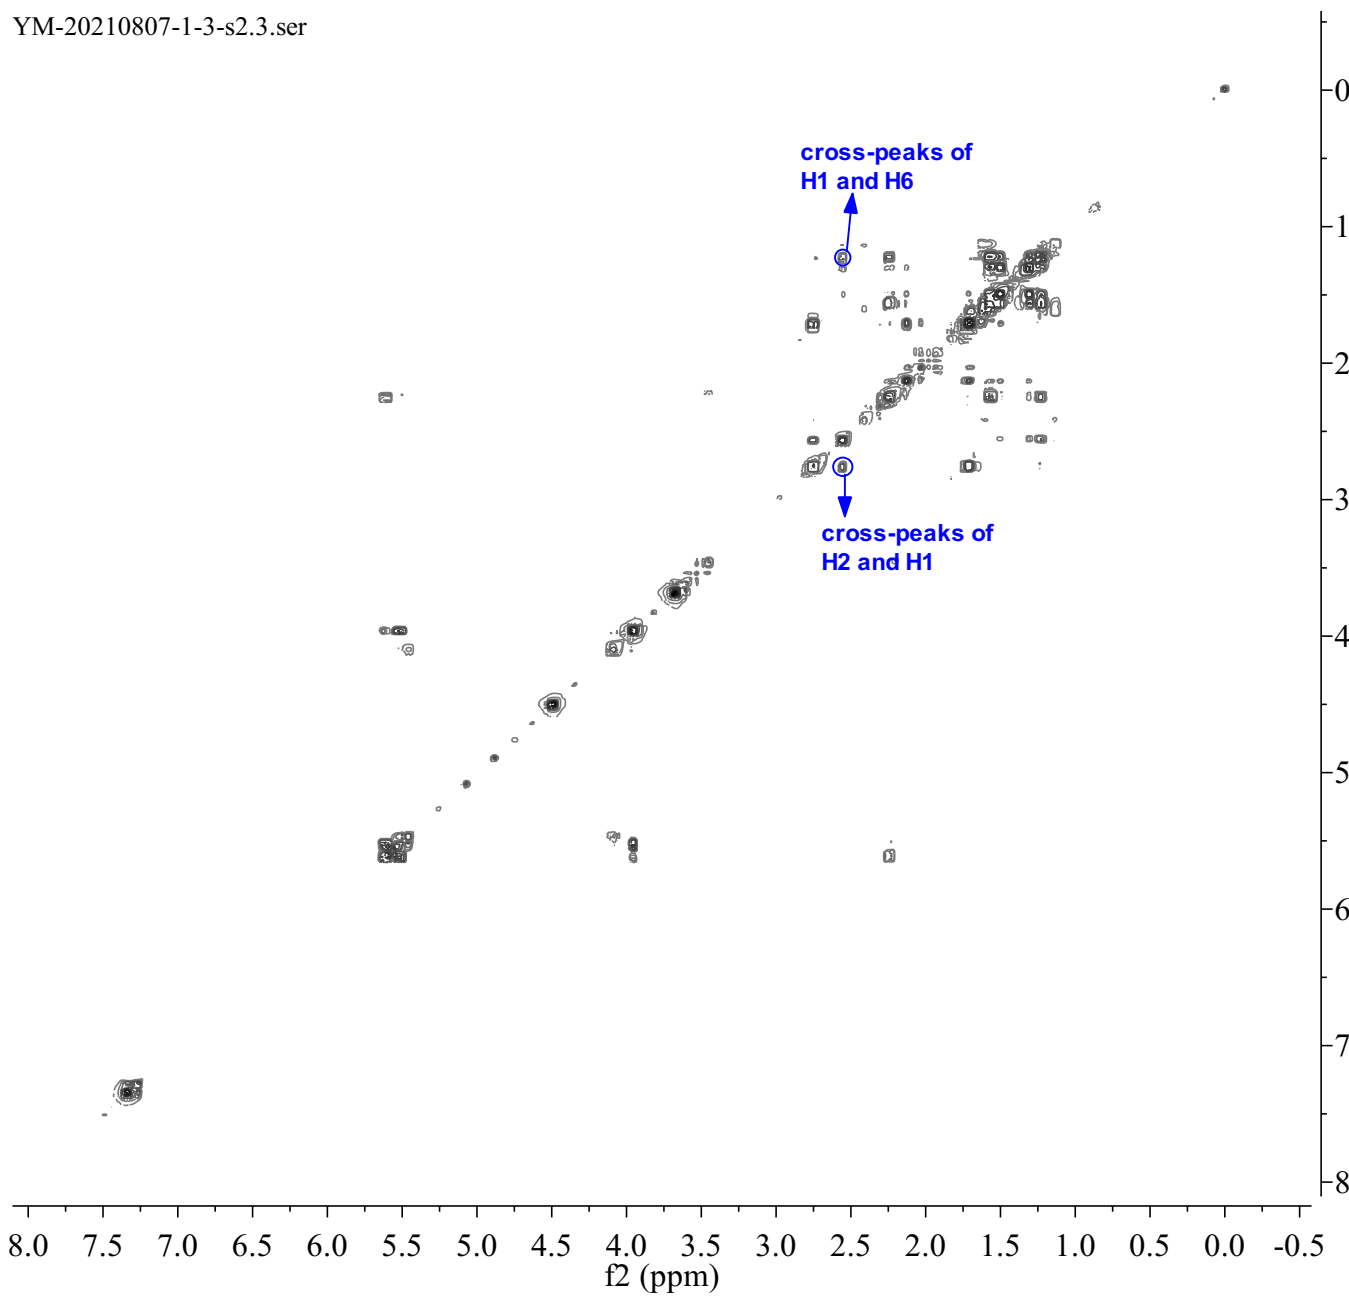

| Parameter         | Value                    |
|-------------------|--------------------------|
| Title             | YM-20210807-1-3-s2.3.ser |
| Comment           |                          |
| Origin            | Bruker BioSpin GmbH      |
| Owner             | nmr                      |
| Site              |                          |
| Instrument        | spect                    |
| Solvent           | CDC13                    |
| Temperature       | 296.1                    |
| Pulse Sequence    | cosy gpppqf              |
| Experiment        | COSY                     |
| Number of Scans   | 1                        |
| Receiver Gain     | 25.2                     |
| Relaxation Delay  | 1.9177                   |
| Pulse Width       | 11.3200                  |
| Presaturation     |                          |
| Frequency         |                          |
| Acquisition Time  | 0.2355                   |
| Acquisition Date  | 2021-08-09T13:25:00      |
| Modification Date | 2021-08-09T17:00:07      |
| Spectrometer      | (500.13, 500.13)         |
| Frequency         |                          |
| Spectral Width    | (4347.8, 4347.8)         |
| Lowest Frequency  | (-294.2, -294.2)         |
| Nucleus           | (1H, 1H)                 |
| Acquired Size     | (1024, 128)              |

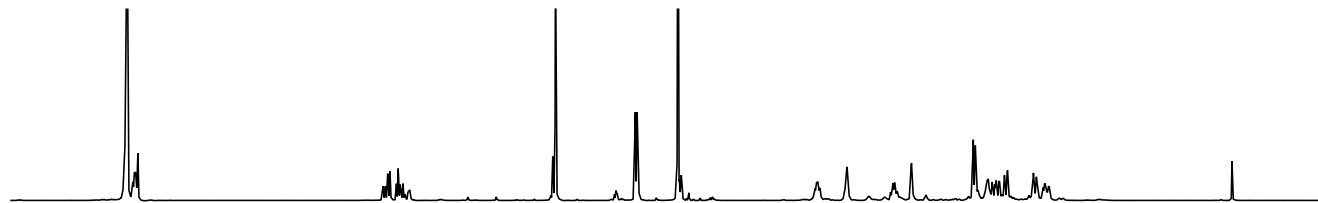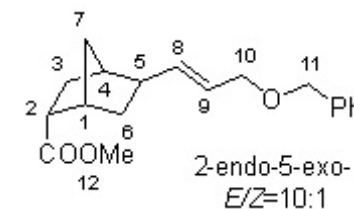

YM-20210807-1-3-s2.4.ser

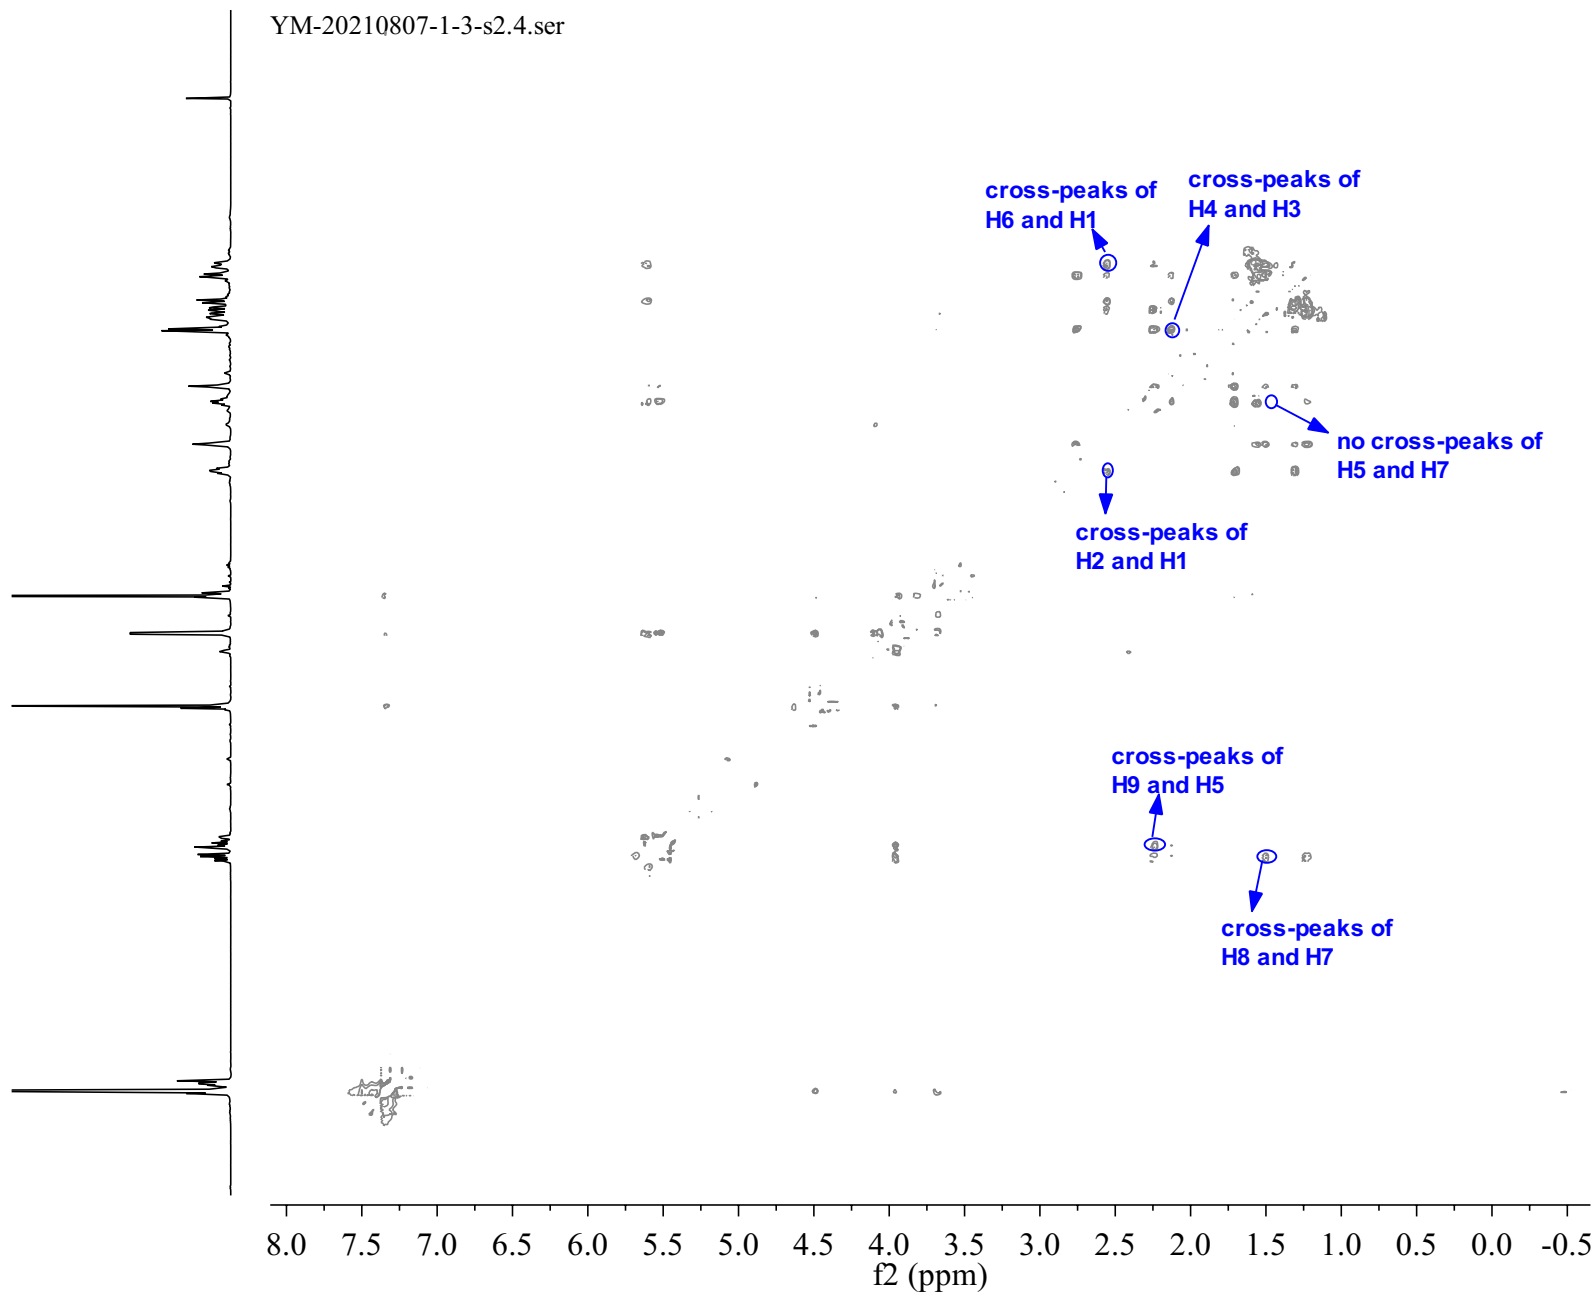

| Parameter               | Value                    |
|-------------------------|--------------------------|
| Title                   | YM-20210807-1-3-s2.4.ser |
| Comment                 |                          |
| Origin                  | Bruker BioSpin GmbH      |
| Owner                   | nmr                      |
| Site                    |                          |
| Instrument              | spect                    |
| Solvent                 | CDCl3                    |
| Temperature             | 296.1                    |
| Pulse Sequence          | noesygp.php              |
| Experiment              | NOESY                    |
| Number of Scans         | 4                        |
| Receiver Gain           | 25.2                     |
| Relaxation Delay        | 1.9713                   |
| Pulse Width             | 11.3200                  |
| Presaturation Frequency |                          |
| Acquisition Time        | 0.2335                   |
| Acquisition Date        | 2021-08-09T13:32:00      |
| Modification Date       | 2021-08-09T17:00:08      |
| Spectrometer Frequency  | (500.13, 500.13)         |
| Spectral Width          | (4386.0, 4386.0)         |
| Lowest Frequency        | (-331.1, -331.1)         |
| Nucleus                 | (1H, 1H)                 |
| Acquired Size           | (1024, 256)              |
| Spectral Size           | (1024, 1024)             |

YM-20240624-1-iso. 31. fid  
s31-36

| Parameter               | Value                    |
|-------------------------|--------------------------|
| Title                   | YM-20240624-1-iso.31.fid |
| Comment                 | s31-36                   |
| Origin                  | Bruker BioSpin GmbH      |
| Owner                   | nmr                      |
| Site                    |                          |
| Instrument              | spect                    |
| Solvent                 | CDC13                    |
| Temperature             | 296.1                    |
| Pulse Sequence          | zg30                     |
| Experiment              | 1D                       |
| Number of Scans         | 16                       |
| Receiver Gain           | 77.6                     |
| Relaxation Delay        | 1.0000                   |
| Pulse Width             | 11.3200                  |
| Presaturation Frequency |                          |
| Acquisition Time        | 3.2768                   |
| Acquisition Date        | 2024-06-28T04:16:20      |
| Modification Date       | 2024-06-28T10:14:24      |
| Spectrometer Frequency  | 500.13                   |
| Spectral Width          | 10000.0                  |
| Lowest Frequency        | -1922.3                  |
| Nucleus                 | 1H                       |
| Acquired Size           | 32768                    |
| Spectral Size           | 65536                    |

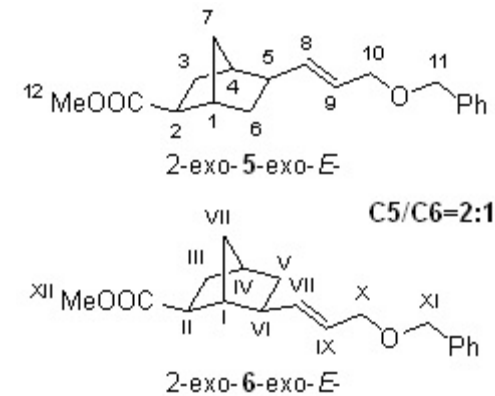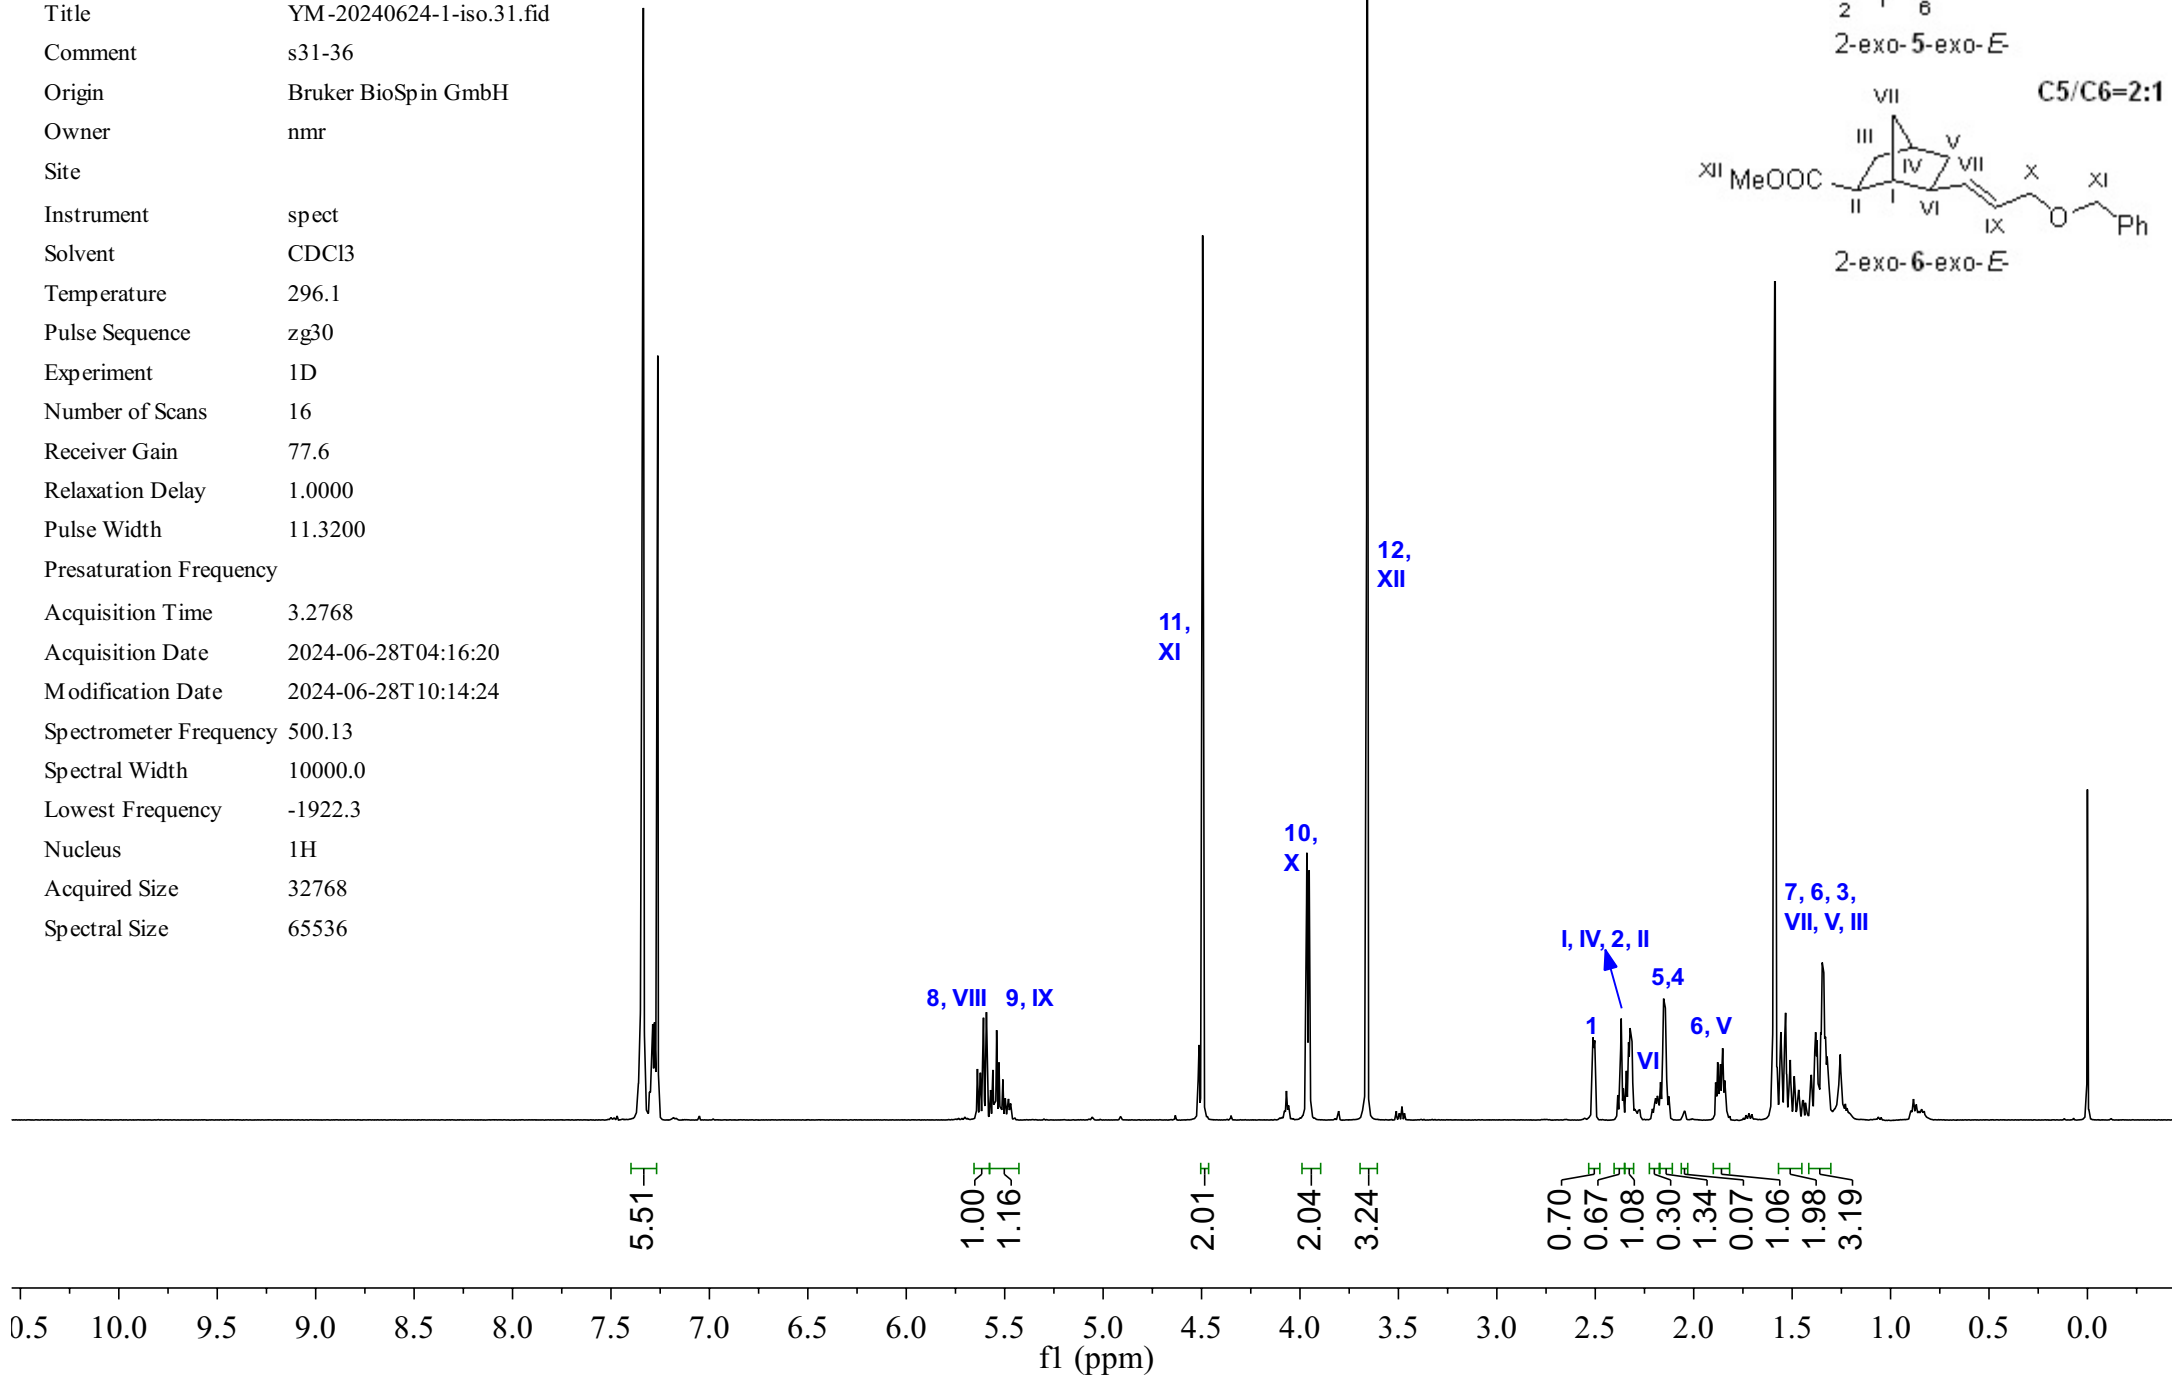

YM-20240624-1-iso. 34. fid  
s31-36

176.6  
176.3

139.4  
138.9  
138.5  
128.5  
127.9  
127.7  
124.8  
124.5

72.1  
72.1  
71.0  
71.0  
51.9  
51.8  
46.7  
46.6  
46.0  
44.5  
43.9  
42.2  
41.3  
37.4  
36.8  
36.4  
34.3  
34.0  
34.0  
33.6

| Parameter               | Value                    |
|-------------------------|--------------------------|
| Title                   | YM-20240624-1-iso.34.fid |
| Comment                 | s31-36                   |
| Origin                  | Bruker BioSpin GmbH      |
| Owner                   | nmr                      |
| Site                    |                          |
| Instrument              | spect                    |
| Solvent                 | CDC13                    |
| Temperature             | 296.1                    |
| Pulse Sequence          | zgpg30                   |
| Experiment              | 1D                       |
| Number of Scans         | 256                      |
| Receiver Gain           | 193.1                    |
| Relaxation Delay        | 2.0000                   |
| Pulse Width             | 9.9400                   |
| Presaturation Frequency |                          |
| Acquisition Time        | 1.1010                   |
| Acquisition Date        | 2024-06-28T05:22:37      |
| Modification Date       | 2024-06-28T10:14:27      |
| Spectrometer Frequency  | 125.77                   |
| Spectral Width          | 29761.9                  |
| Lowest Frequency        | -2305.8                  |
| Nucleus                 | 13C                      |
| Acquired Size           | 32768                    |
| Spectral Size           | 65536                    |

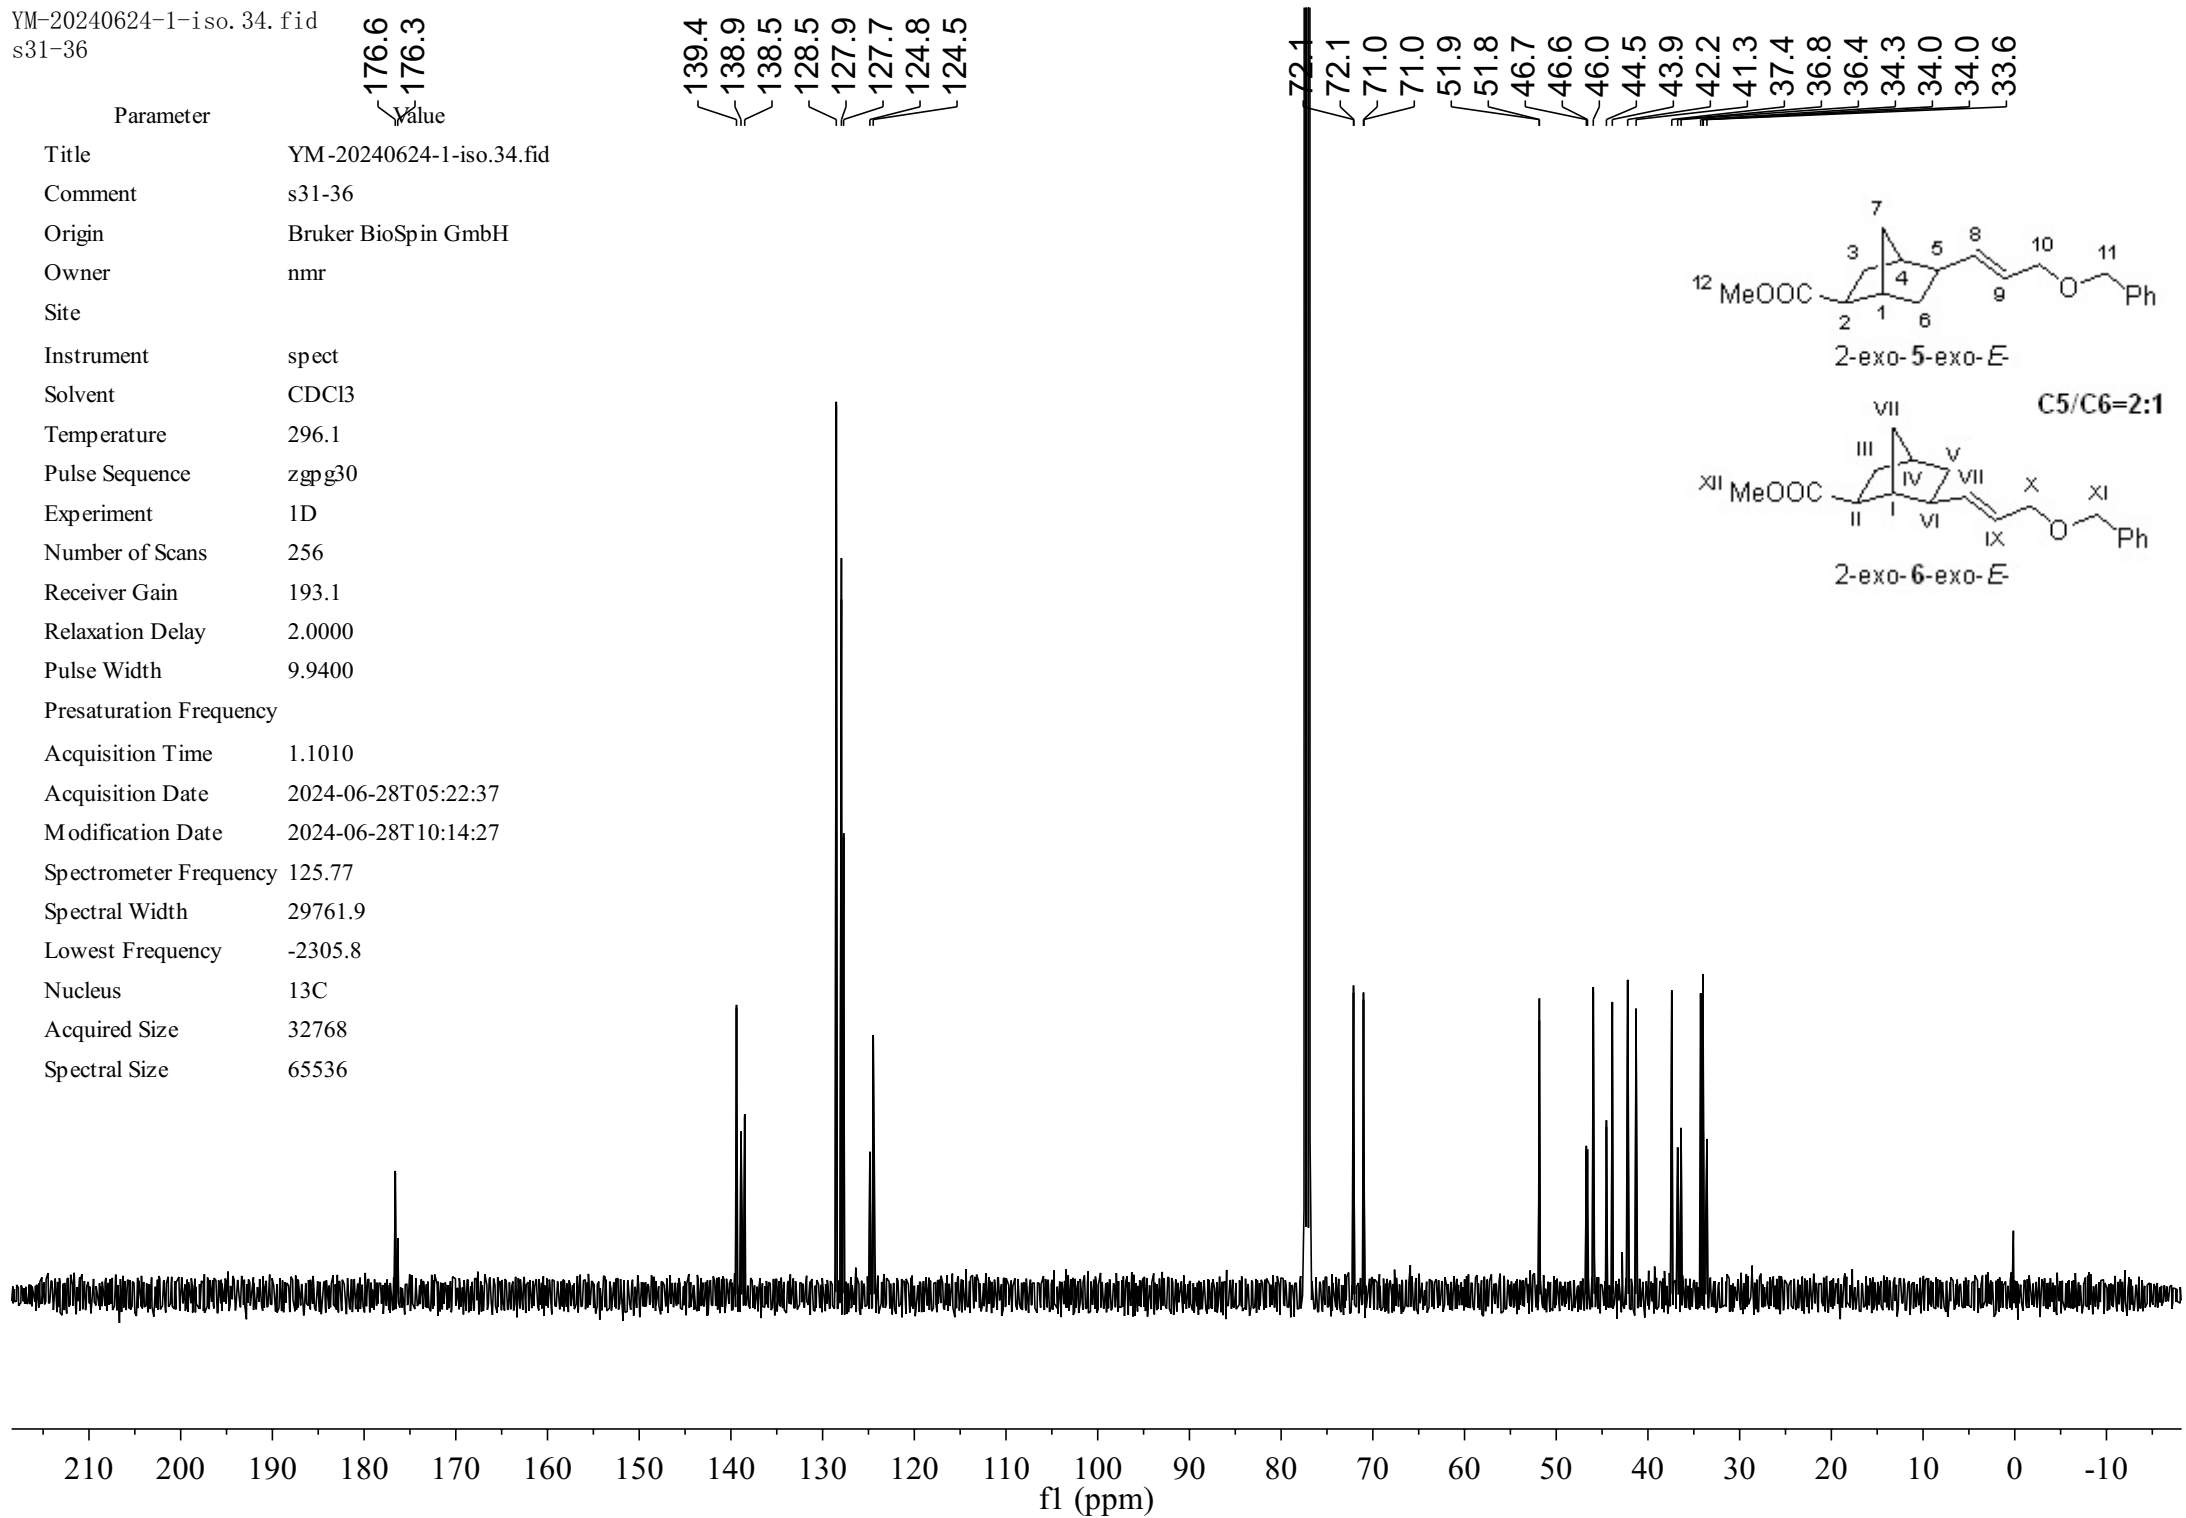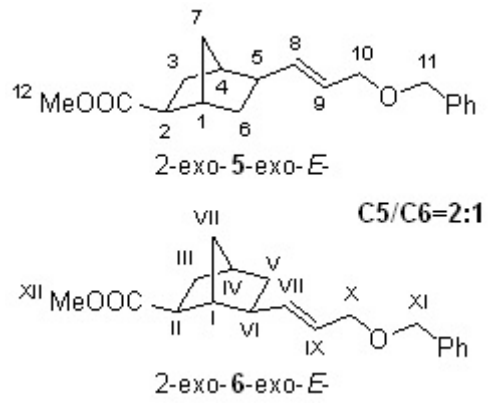

YM-20240624-1-iso.47.fid

| 31-36 | Parameter               | Value                    |
|-------|-------------------------|--------------------------|
|       | Title                   | YM-20240624-1-iso.47.fid |
|       | Comment                 | 31-36                    |
|       | Origin                  | Bruker BioSpin GmbH      |
|       | Owner                   | nmrsu                    |
|       | Site                    |                          |
|       | Instrument              | Avance NEO 600           |
|       | Solvent                 | CDC13                    |
|       | Temperature             | 295.4                    |
|       | Pulse Sequence          | deptsq 135               |
|       | Experiment              | DEPT-135                 |
|       | Number of Scans         | 61                       |
|       | Receiver Gain           | 101.0                    |
|       | Relaxation Delay        | 2.0000                   |
|       | Pulse Width             | 11.7300                  |
|       | Presaturation Frequency |                          |
|       | Acquisition Time        | 1.3763                   |
|       | Acquisition Date        | 2024-06-30T13:36:48      |
|       | Modification Date       | 2024-06-30T13:42:08      |
|       | Spectrometer Frequency  | 150.93                   |
|       | Spectral Width          | 23809.5                  |
|       | Lowest Frequency        | 168.9                    |
|       | Nucleus                 | 13C                      |
|       | Acquired Size           | 32768                    |
|       | Spectral Size           | 65536                    |

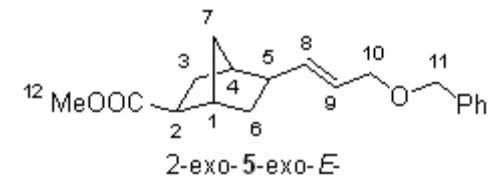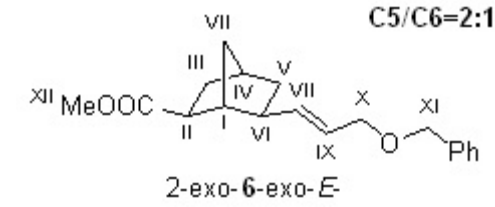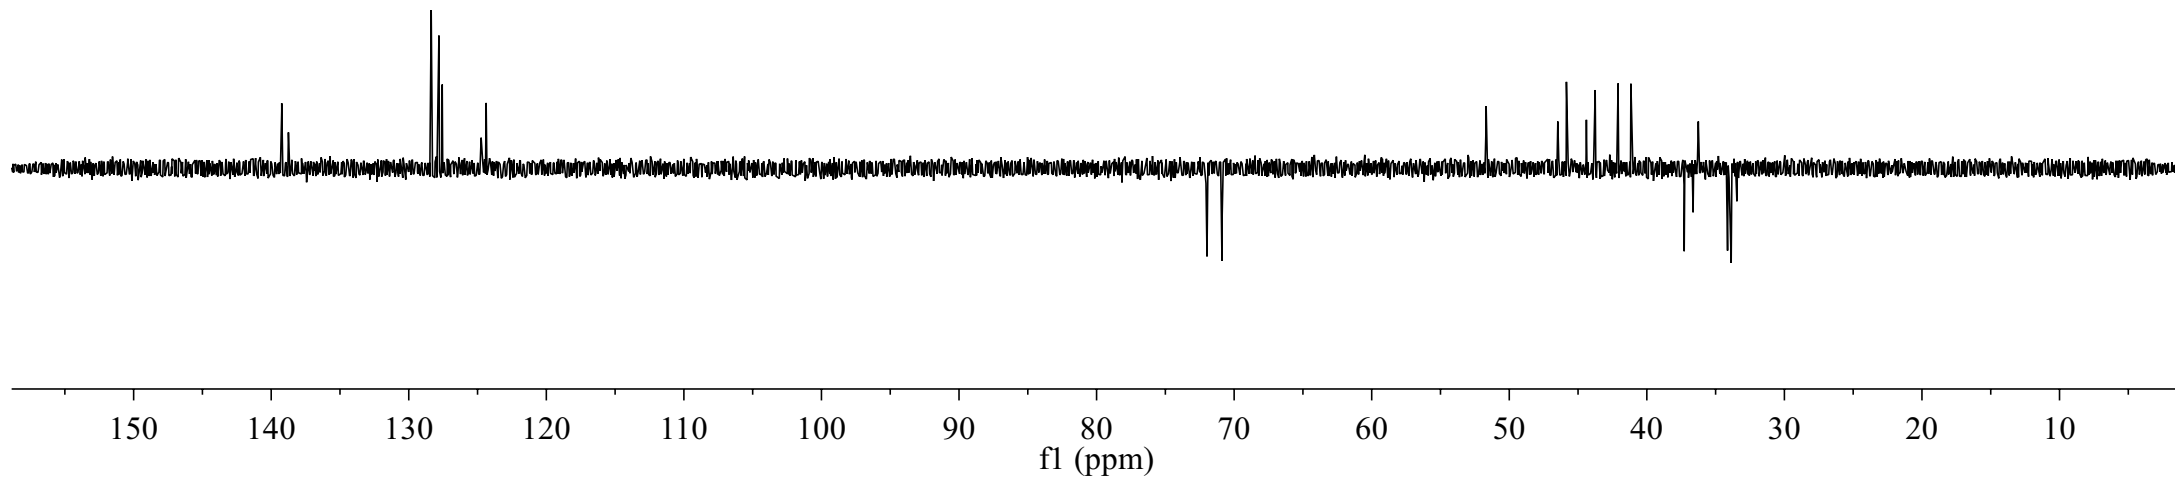



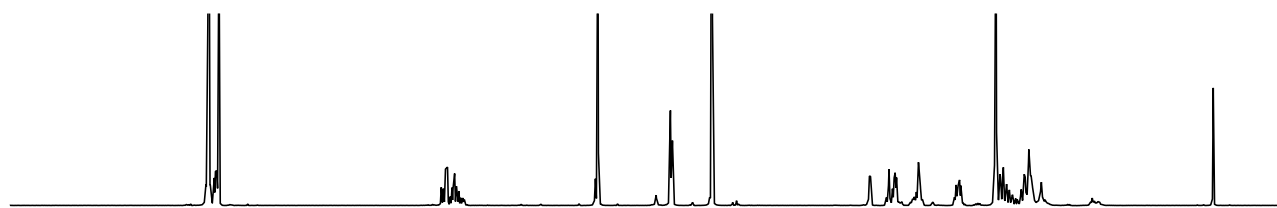

YM-20240624-1-iso.43.ser

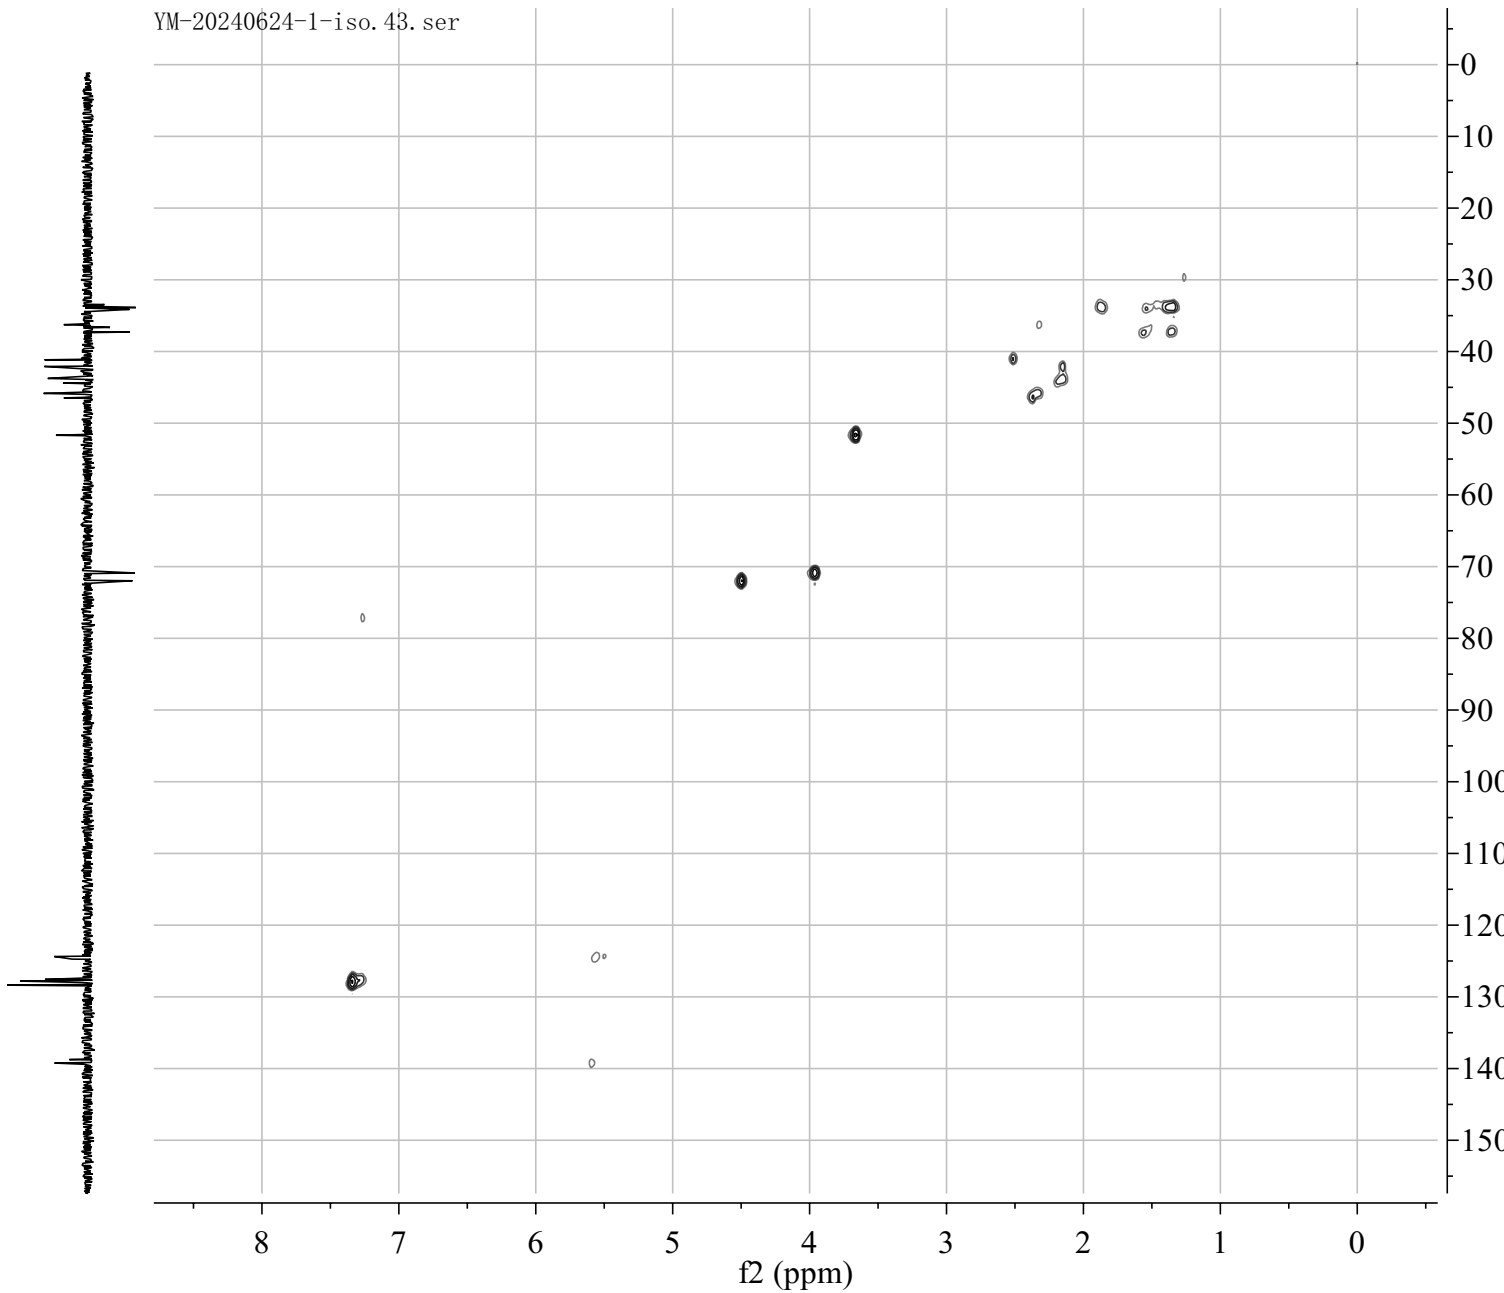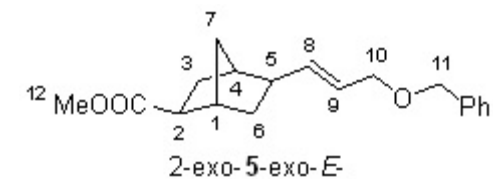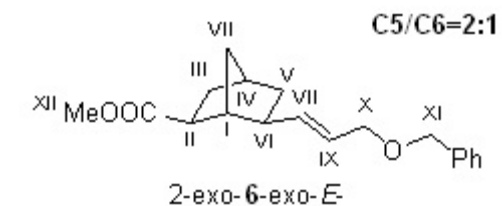

C5/C6=2:1

| Parameter               | Value                    |
|-------------------------|--------------------------|
| Title                   | YM-20240624-1-iso.43.ser |
| Comment                 |                          |
| Origin                  | Bruker BioSpin GmbH      |
| Owner                   | PC                       |
| Site                    |                          |
| Instrument              | spect                    |
| Solvent                 | CDCl3                    |
| Temperature             | 297.2                    |
| Pulse Sequence          | hsqcetgp                 |
| Experiment              | HSQC                     |
| Number of Scans         | 2                        |
| Receiver Gain           | 196.4                    |
| Relaxation Delay        | 1.4623                   |
| Pulse Width             | 9.2600                   |
| Presaturation Frequency |                          |
| Acquisition Time        | 0.1362                   |
| Acquisition Date        | 2024-06-28T12:58:40      |
| Modification Date       | 2024-06-28T13:53:59      |
| Spectrometer Frequency  | (400.13, 100.62)         |
| Spectral Width          | (3759.4, 16666.7)        |
| Lowest Frequency        | (-242.4, -829.1)         |
| Nucleus                 | (1H, 13C)                |
| Acquired Size           | (512, 256)               |
| Spectral Size           | (512, 512)               |

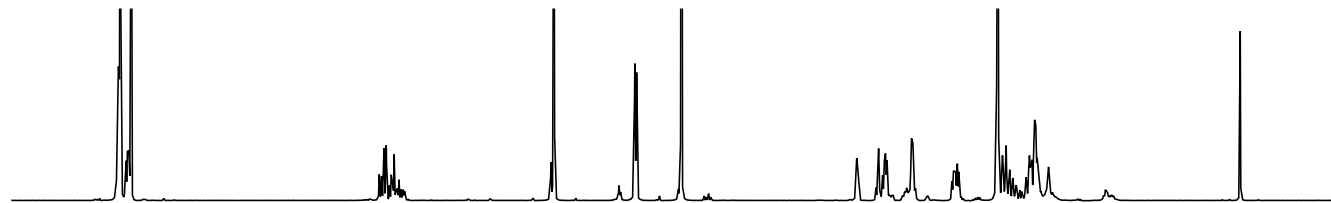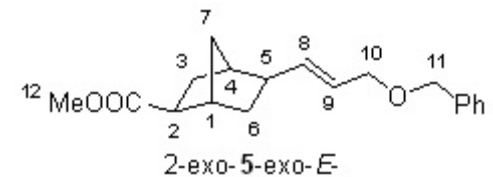

YM-20240624-1-iso.32.ser  
s31-36

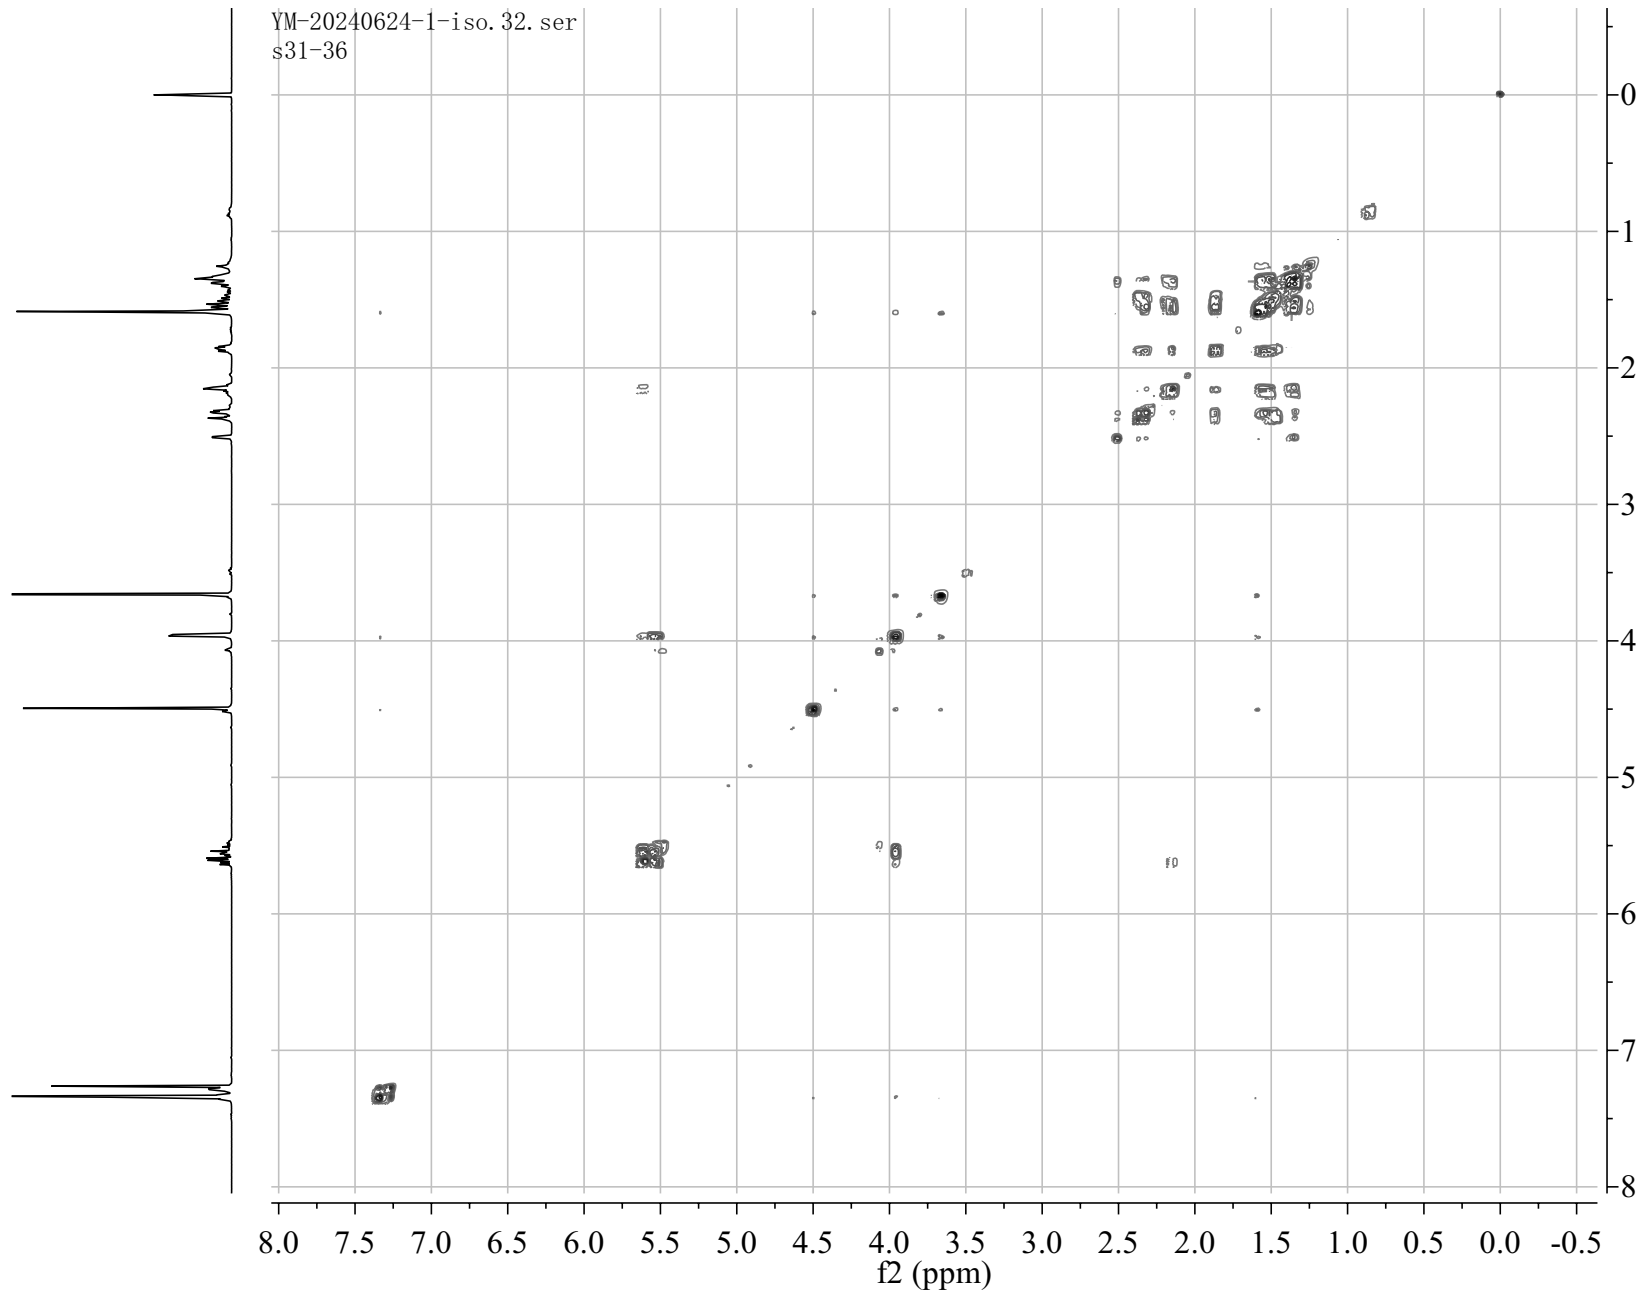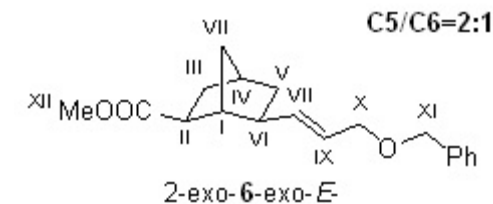

C5/C6=2:1

| Parameter               | Value                    |
|-------------------------|--------------------------|
| Title                   | YM-20240624-1-iso.32.ser |
| Comment                 | s31-36                   |
| Origin                  | Bruker BioSpin GmbH      |
| Owner                   | nmr                      |
| Site                    |                          |
| Instrument              | spect                    |
| Solvent                 | CDCl3                    |
| Temperature             | 296.1                    |
| Pulse Sequence          | cosygpppqf               |
| Experiment              | COSY                     |
| Number of Scans         | 1                        |
| Receiver Gain           | 34.4                     |
| Relaxation Delay        | 1.9177                   |
| Pulse Width             | 11.3200                  |
| Presaturation Frequency |                          |
| Acquisition Time        | 0.2355                   |
| Acquisition Date        | 2024-06-28T04:17:28      |
| Modification Date       | 2024-06-28T10:14:24      |
| Spectrometer Frequency  | (500.13, 500.13)         |
| Spectral Width          | (4347.8, 4347.8)         |
| Lowest Frequency        | (-322.6, -322.6)         |
| Nucleus                 | (1H, 1H)                 |
| Acquired Size           | (1024, 128)              |
| Spectral Size           | (1024, 1024)             |

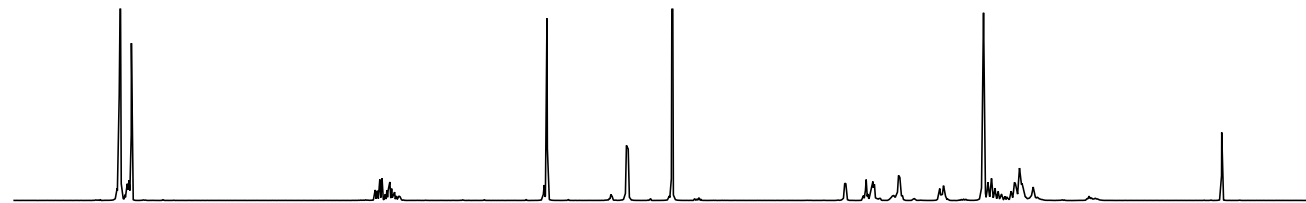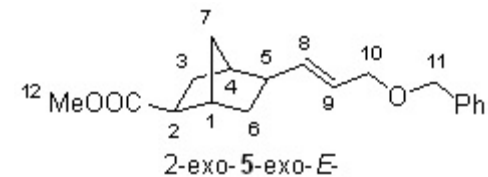

YM-20240624-1-iso.33.ser  
s31-36

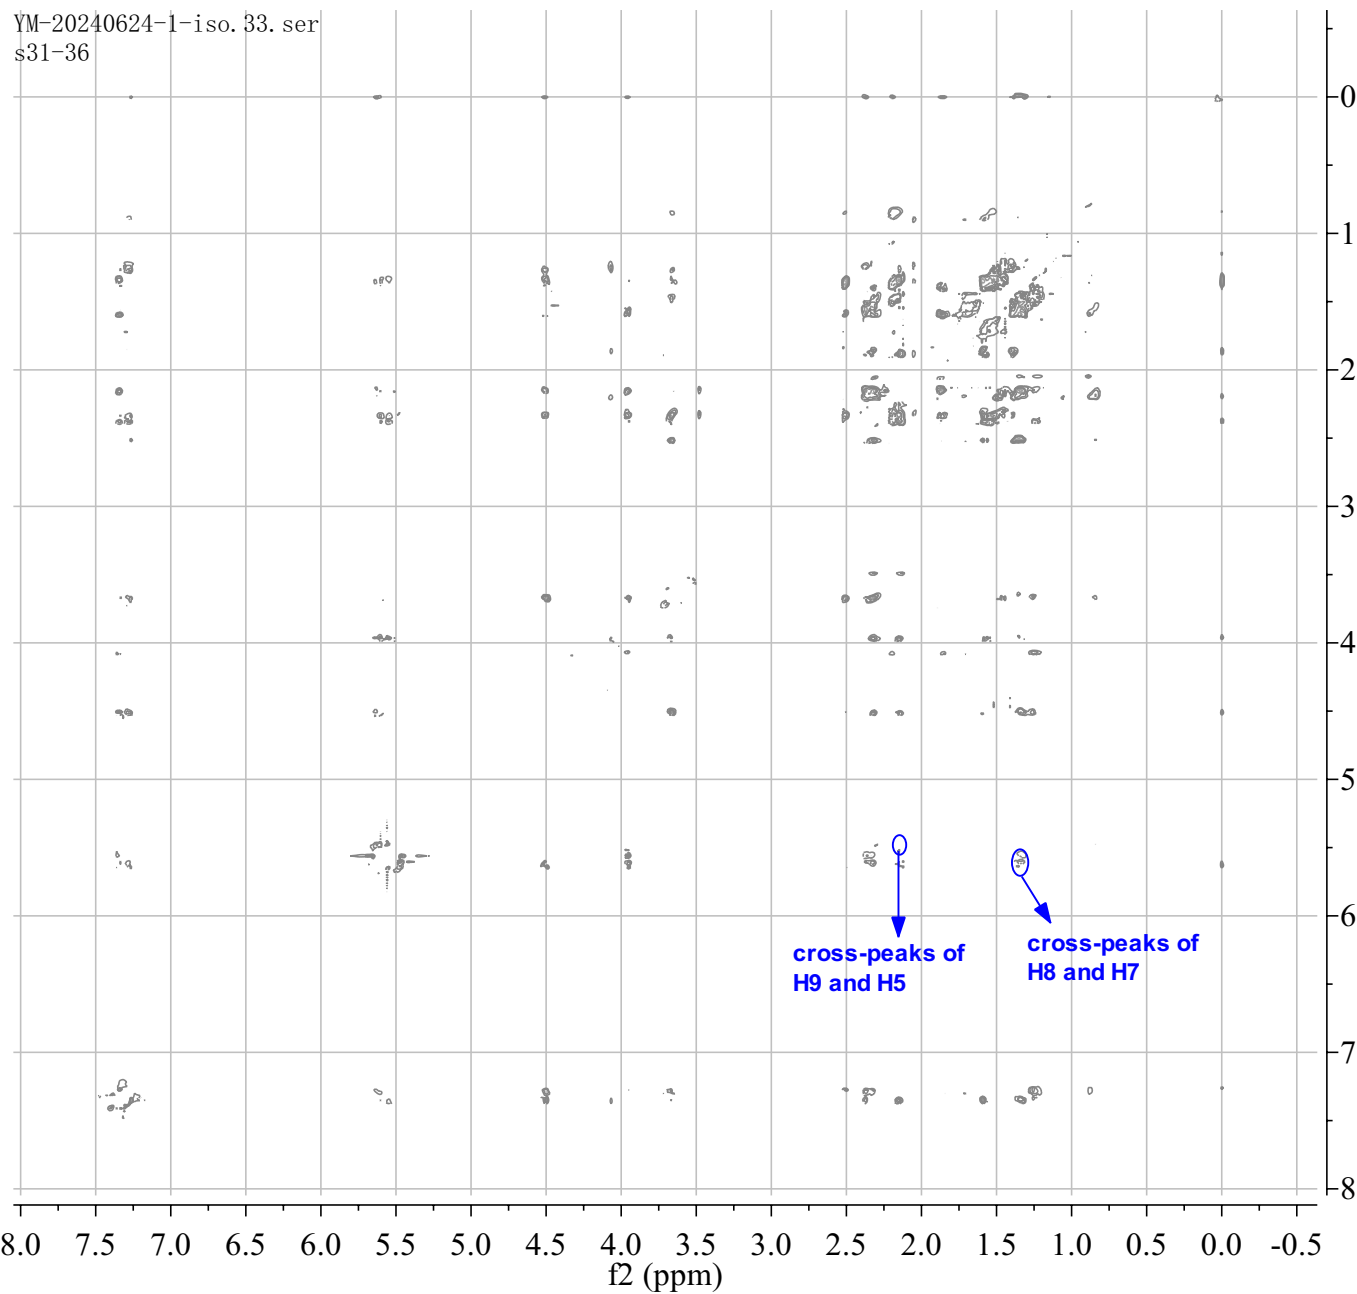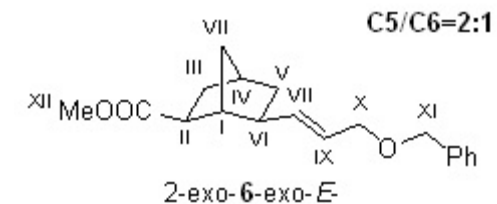

| Parameter               | Value                    |
|-------------------------|--------------------------|
| Title                   | YM-20240624-1-iso.33.ser |
| Comment                 | s31-36                   |
| Origin                  | Bruker BioSpin GmbH      |
| Owner                   | nmr                      |
| Site                    |                          |
| Instrument              | spect                    |
| Solvent                 | CDCl3                    |
| Temperature             | 296.2                    |
| Pulse Sequence          | noesygp phpp             |
| Experiment              | NOESY                    |
| Number of Scans         | 4                        |
| Receiver Gain           | 62.9                     |
| Relaxation Delay        | 1.9693                   |
| Pulse Width             | 11.3200                  |
| Presaturation Frequency |                          |
| Acquisition Time        | 0.2355                   |
| Acquisition Date        | 2024-06-28T04:24:24      |
| Modification Date       | 2024-06-28T10:14:25      |
| Spectrometer Frequency  | (500.13, 500.13)         |
| Spectral Width          | (4347.8, 4347.8)         |
| Lowest Frequency        | (-322.6, -322.6)         |
| Nucleus                 | (1H, 1H)                 |
| Acquired Size           | (1024, 256)              |
| Spectral Size           | (1024, 1024)             |

| Parameter               | Value                 |
|-------------------------|-----------------------|
| Title                   | GX-21165-2-23-2.3.fid |
| Comment                 |                       |
| Origin                  | Bruker BioSpin GmbH   |
| Owner                   | nmr                   |
| Site                    |                       |
| Instrument              | spect                 |
| Solvent                 | CDC13                 |
| Temperature             | 296.2                 |
| Pulse Sequence          | zg30                  |
| Experiment              | 1D                    |
| Number of Scans         | 8                     |
| Receiver Gain           | 54.3                  |
| Relaxation Delay        | 1.0000                |
| Pulse Width             | 11.3200               |
| Presaturation Frequency |                       |
| Acquisition Time        | 3.2768                |
| Acquisition Date        | 2021-09-28T17:28:24   |
| Modification Date       | 2021-12-29T13:11:38   |
| Spectrometer Frequency  | 500.13                |
| Spectral Width          | 10000.0               |
| Lowest Frequency        | -1922.8               |
| Nucleus                 | 1H                    |
| Acquired Size           | 32768                 |
| Spectral Size           | 65536                 |

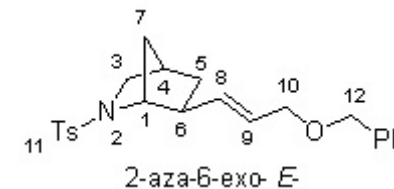

impurities cannot be separated well in this example

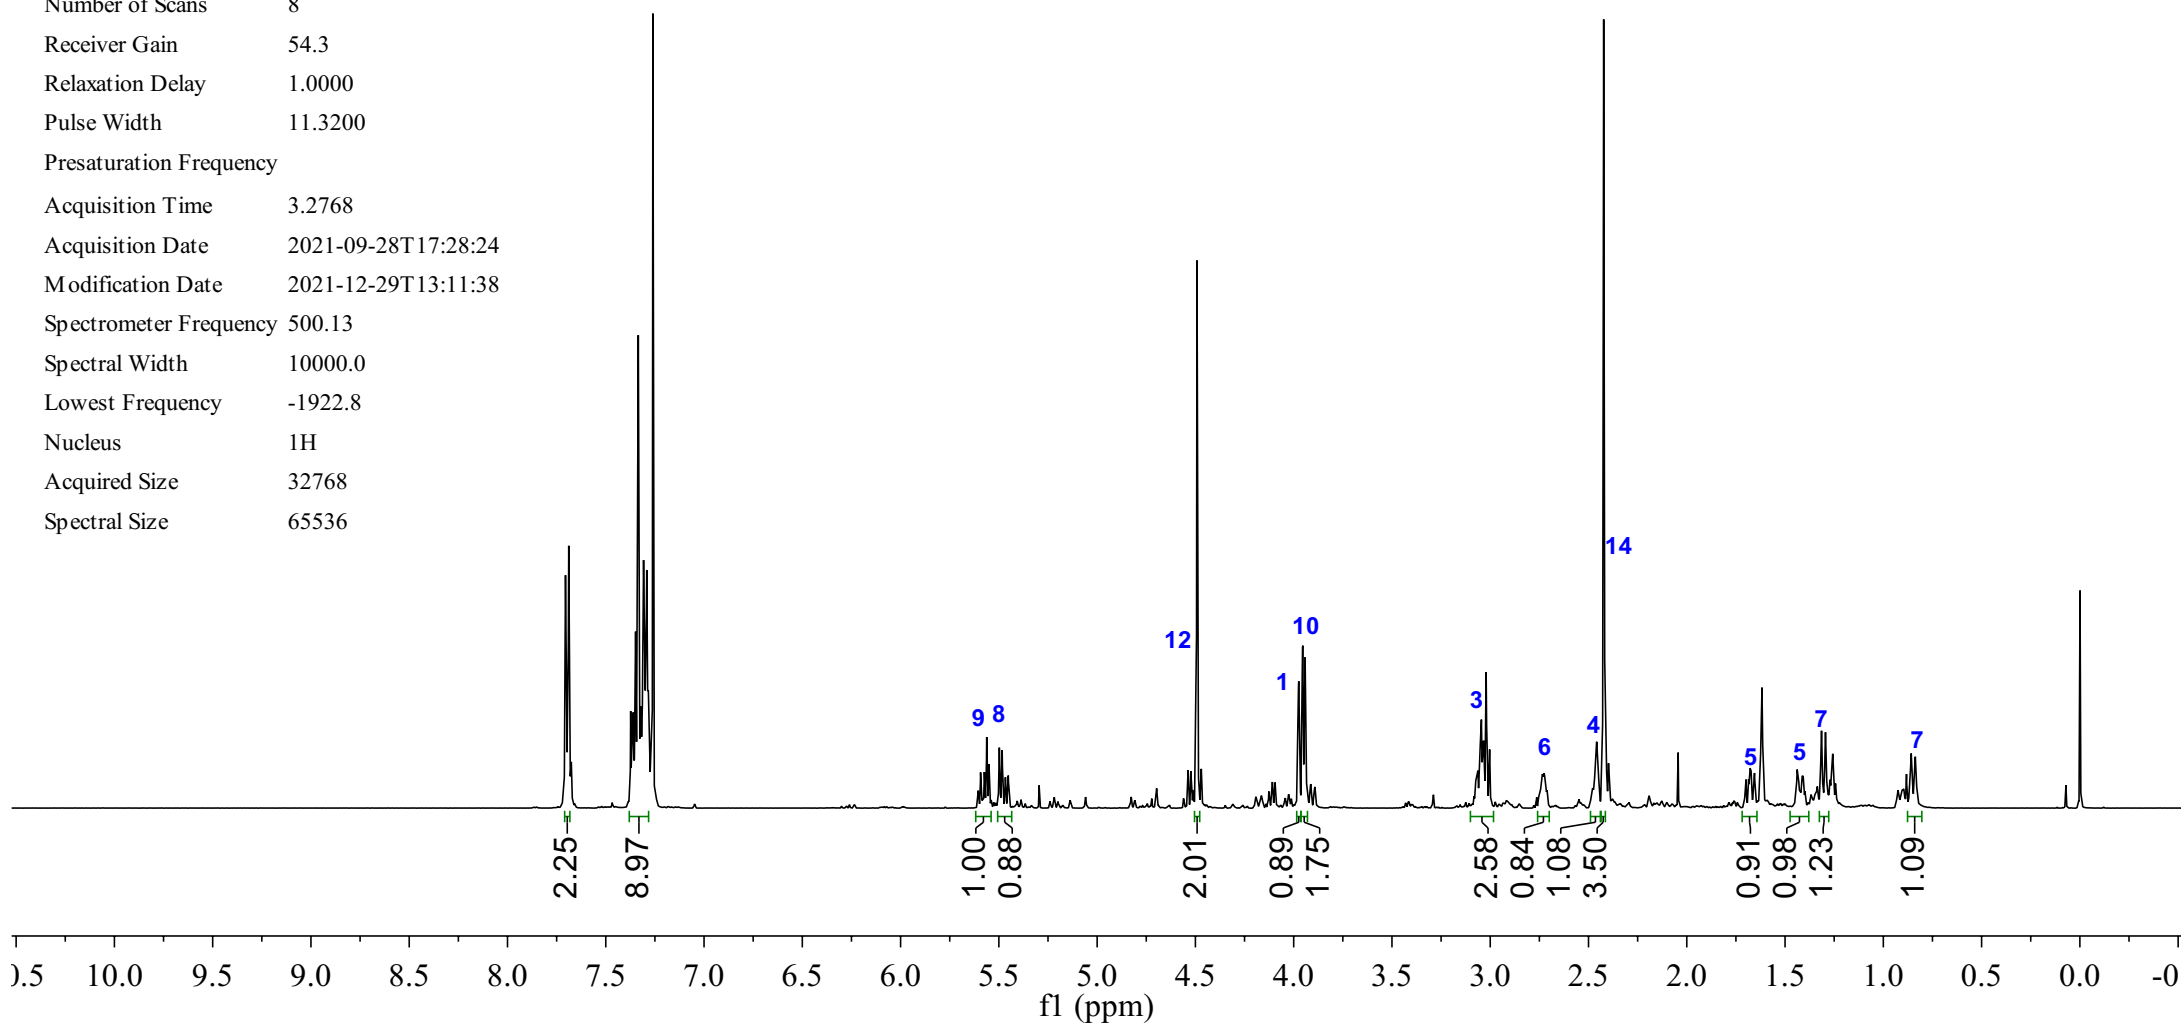

| Parameter               | Value                 |
|-------------------------|-----------------------|
| Title                   | GX-21165-2-23-2.4.fid |
| Comment                 |                       |
| Origin                  | Bruker BioSpin GmbH   |
| Owner                   | nmr                   |
| Site                    |                       |
| Instrument              | spect                 |
| Solvent                 | CDCl3                 |
| Temperature             | 296.1                 |
| Pulse Sequence          | zgpg30                |
| Experiment              | 1D                    |
| Number of Scans         | 33                    |
| Receiver Gain           | 193.1                 |
| Relaxation Delay        | 2.0000                |
| Pulse Width             | 9.9400                |
| Presaturation Frequency |                       |
| Acquisition Time        | 1.1010                |
| Acquisition Date        | 2021-09-28T17:30:17   |
| Modification Date       | 2021-12-29T13:11:38   |
| Spectrometer Frequency  | 125.77                |
| Spectral Width          | 29761.9               |
| Lowest Frequency        | -2292.1               |
| Nucleus                 | 13C                   |
| Acquired Size           | 32768                 |
| Spectral Size           | 65536                 |

143.4  
138.3  
135.8  
135.0  
129.8  
128.5  
127.9  
127.8  
127.5  
127.0

72.4  
70.7  
64.2  
53.8  
46.0  
37.6  
34.9  
34.1  
21.7

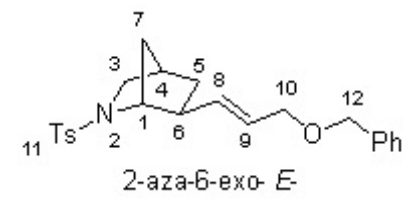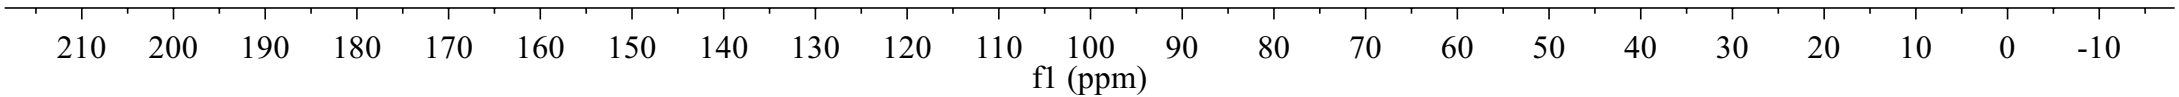

GX-21165-2-23-2.5.fid

| Parameter               | Value                 |
|-------------------------|-----------------------|
| Title                   | GX-21165-2-23-2.5.fid |
| Comment                 |                       |
| Origin                  | Bruker BioSpin GmbH   |
| Owner                   | nmr                   |
| Site                    |                       |
| Instrument              | spect                 |
| Solvent                 | CDC13                 |
| Temperature             | 296.1                 |
| Pulse Sequence          | deptsp135             |
| Experiment              | DEPT-135              |
| Number of Scans         | 48                    |
| Receiver Gain           | 193.1                 |
| Relaxation Delay        | 2.0000                |
| Pulse Width             | 9.9400                |
| Presaturation Frequency |                       |
| Acquisition Time        | 1.6253                |
| Acquisition Date        | 2021-09-28T17:33:51   |
| Modification Date       | 2021-12-29T13:11:40   |
| Spectrometer Frequency  | 125.77                |
| Spectral Width          | 20161.3               |
| Lowest Frequency        | -20.6                 |
| Nucleus                 | 13C                   |
| Acquired Size           | 32768                 |
| Spectral Size           | 65536                 |

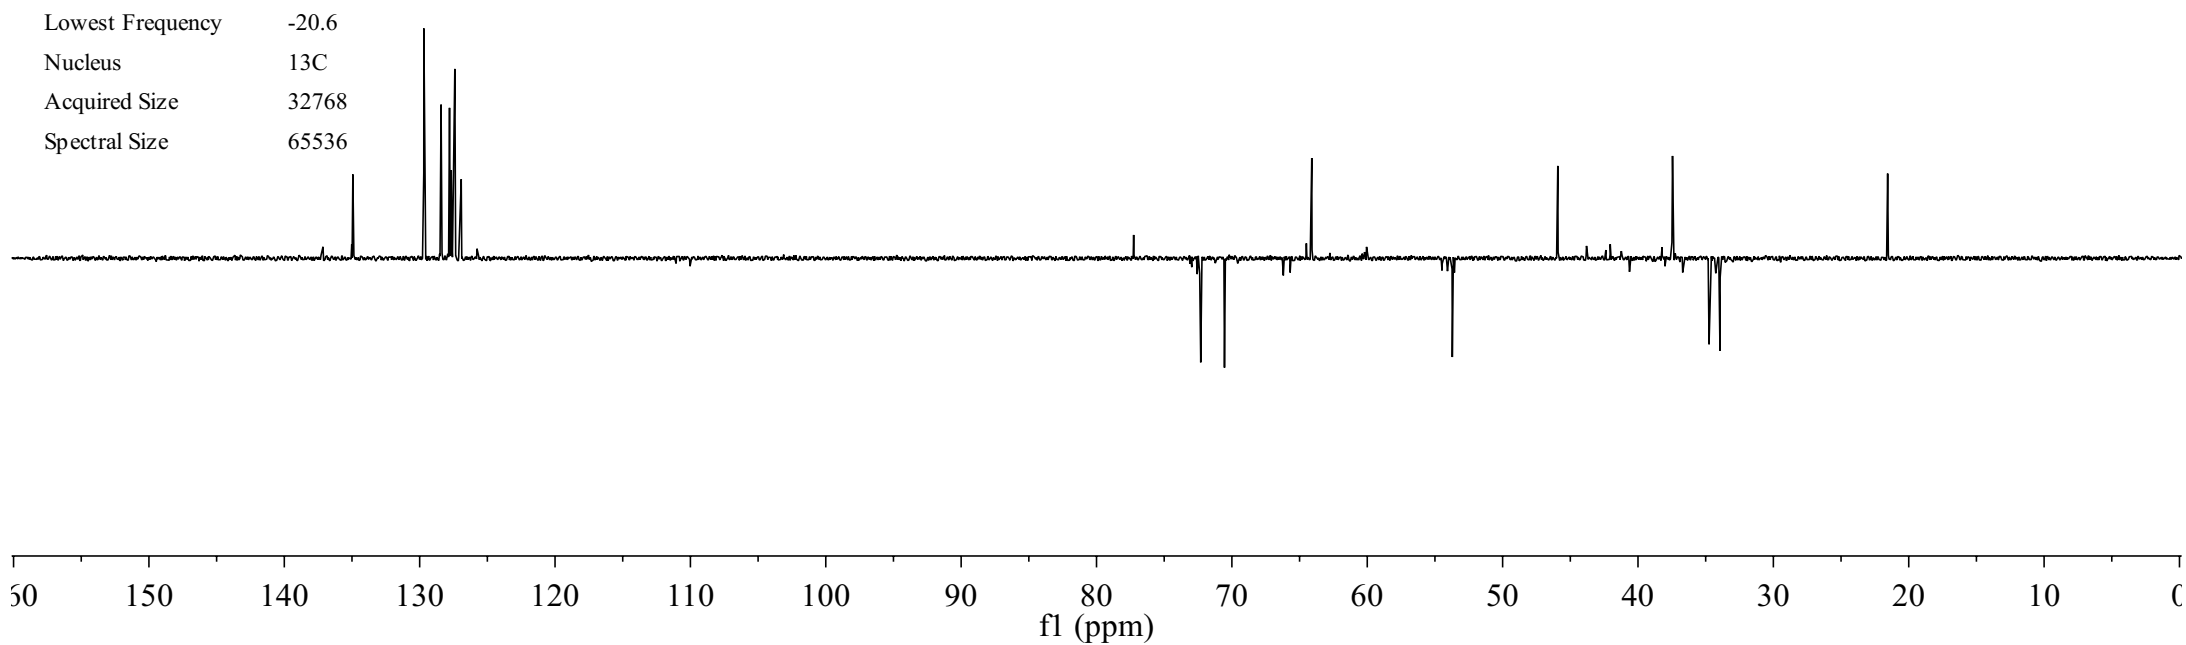

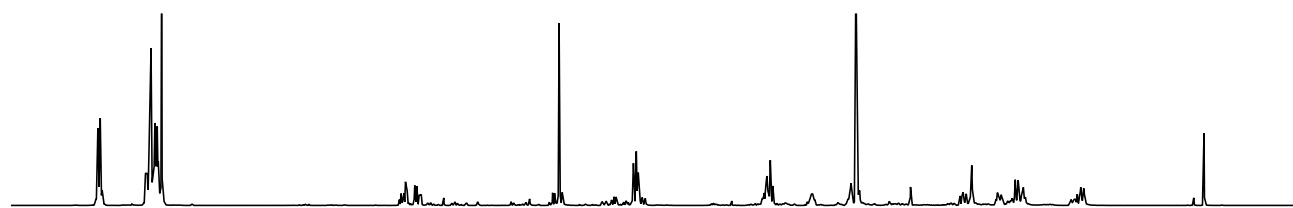

GX-21165-2-23-2. 6. ser

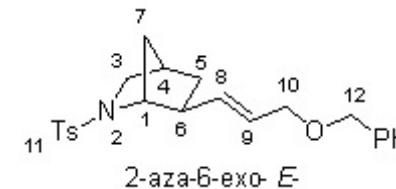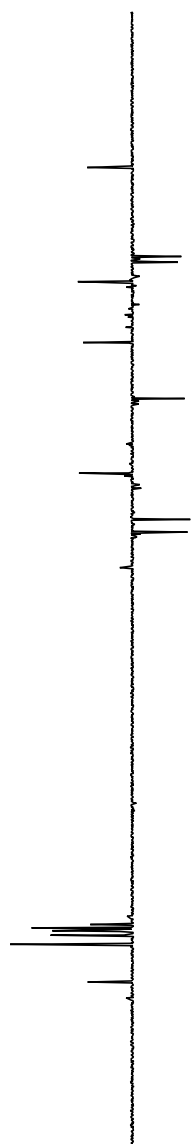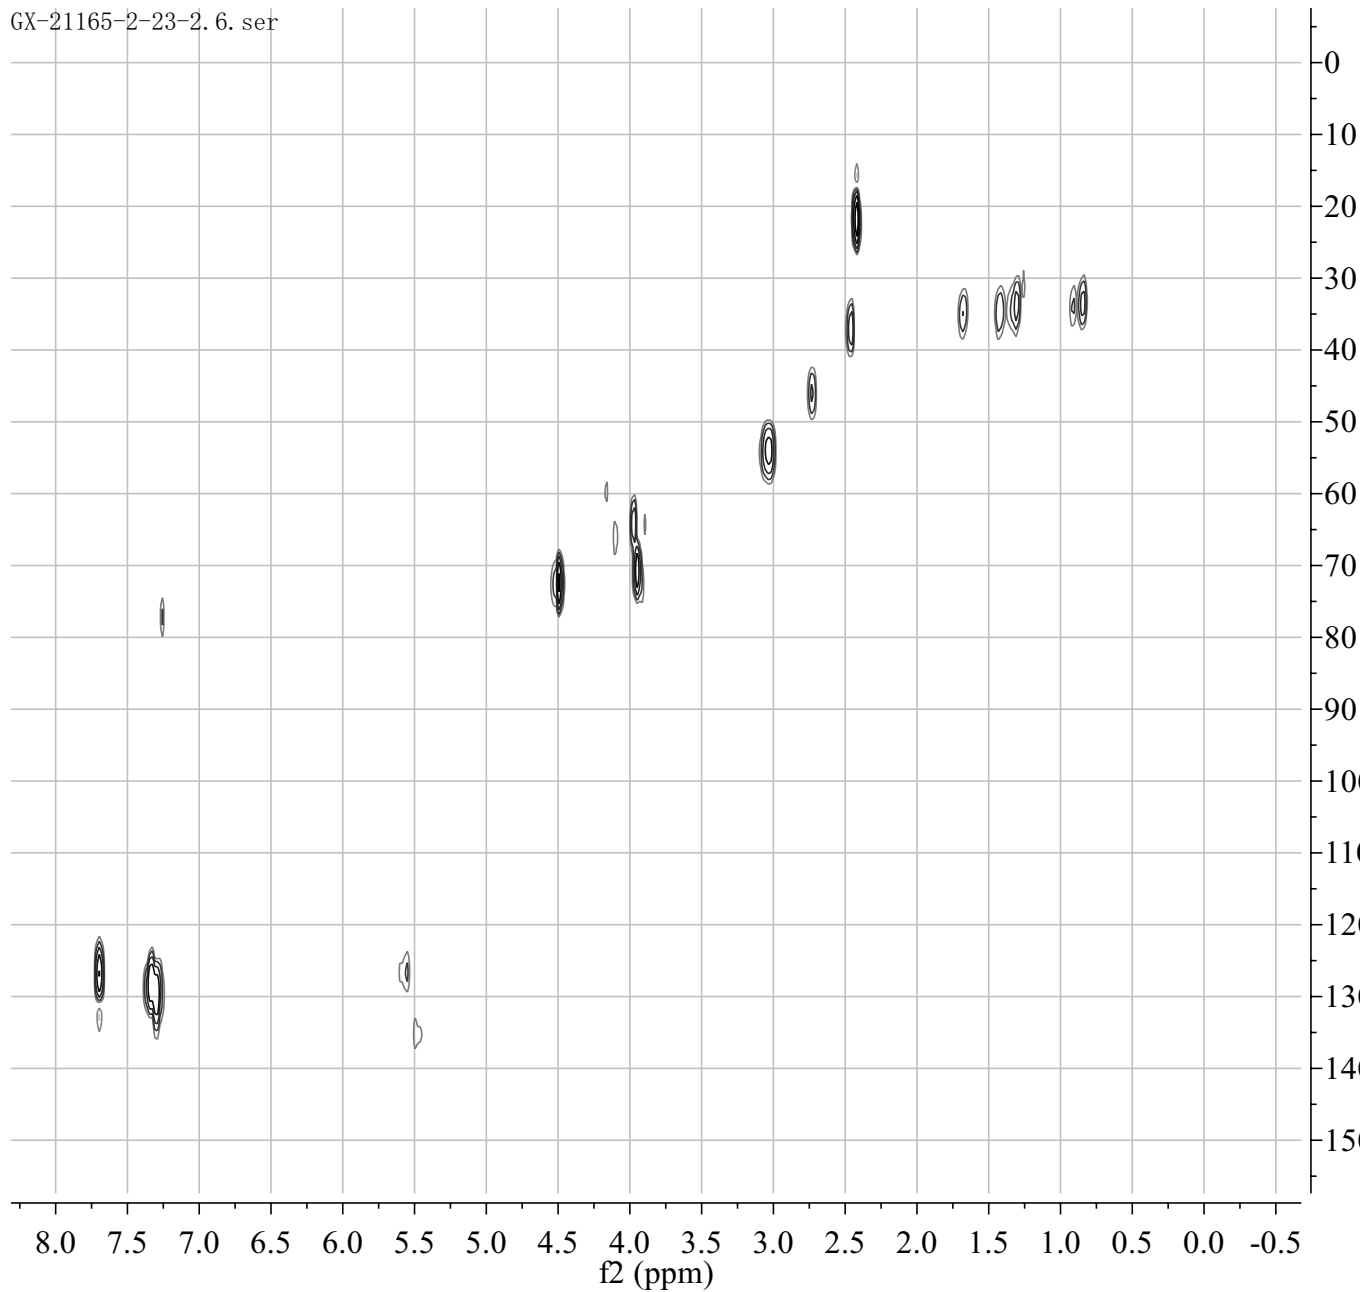

| Parameter               | Value                 |
|-------------------------|-----------------------|
| Title                   | GX-21165-2-23-2.6.ser |
| Comment                 |                       |
| Origin                  | Bruker BioSpin GmbH   |
| Owner                   | nmr                   |
| Site                    |                       |
| Instrument              | spect                 |
| Solvent                 | CDCl3                 |
| Temperature             | 296.2                 |
| Pulse Sequence          | hsqcetgp              |
| Experiment              | HSQC                  |
| Number of Scans         | 2                     |
| Receiver Gain           | 193.1                 |
| Relaxation Delay        | 1.4652                |
| Pulse Width             | 11.3200               |
| Presaturation Frequency |                       |
| Acquisition Time        | 0.1137                |
| Acquisition Date        | 2021-09-28T17:37:27   |
| Modification Date       | 2021-12-29T13:11:40   |
| Spectrometer Frequency  | (500.13, 125.77)      |
| Spectral Width          | (4504.5, 20833.3)     |
| Lowest Frequency        | (-347.8, -1037.0)     |
| Nucleus                 | (1H, 13C)             |
| Acquired Size           | (512, 64)             |
| Spectral Size           | (512, 256)            |

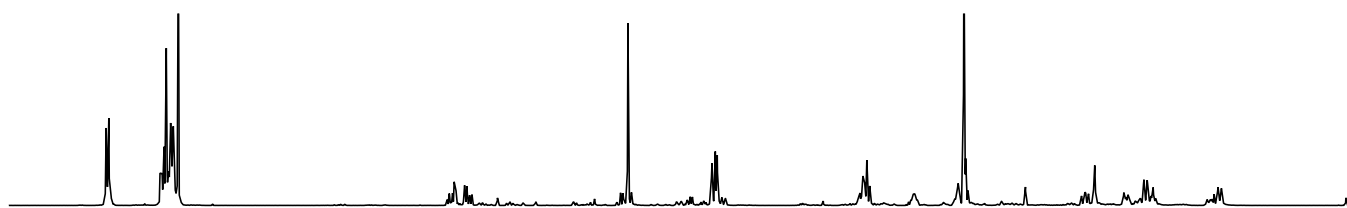

GX-21165-2+23-2. 2. ser

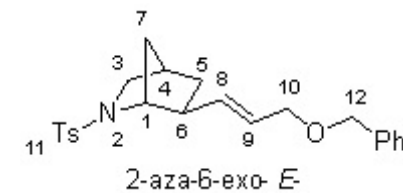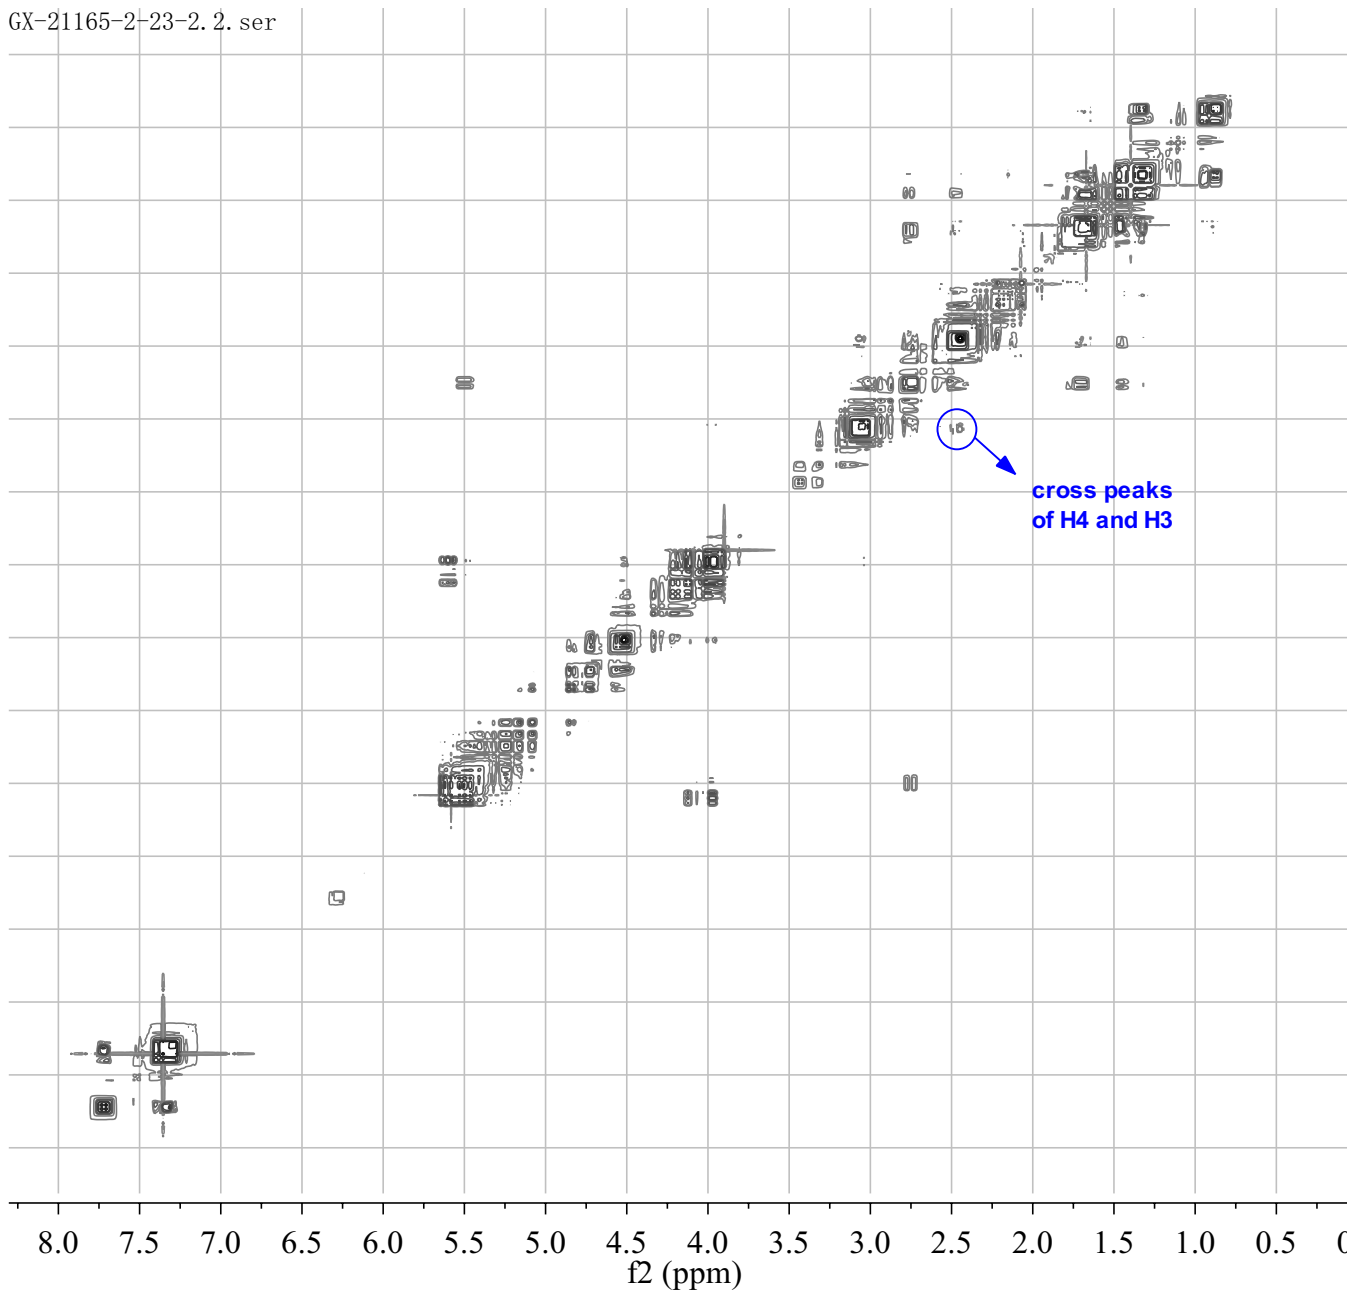

| Parameter                               | Value                 |
|-----------------------------------------|-----------------------|
| Title                                   | GX-21165-2-23-2.2.ser |
| Comment                                 |                       |
| Origin                                  | Bruker BioSpin GmbH   |
| Owner                                   | nmr                   |
| Site                                    |                       |
| Instrument                              | spect                 |
| Solvent                                 | CDCI3                 |
| Temperature                             | 295.7                 |
| Pulse Sequence                          | cosygpppqf            |
| Experiment                              | COSY                  |
| Number of Scans                         | 1                     |
| Receiver Gain                           | 154.6                 |
| Relaxation Delay                        | 2.0000                |
| Pulse Width                             | 9.1500                |
| Presaturation Frequency                 |                       |
| Acquisition Time                        | 0.1917                |
| Acquisition Date                        | 2021-09-28T14:12:39   |
| Modification Date                       | 2021-12-29T13:11:36   |
| Spectrometer Frequency (400.13, 400.13) |                       |
| Spectral Width                          | (5341.9, 5341.9)      |
| Lowest Frequency                        | (-265.3, -265.3)      |
| Nucleus                                 | (1H, 1H)              |
| Acquired Size                           | (1024, 64)            |
| Spectral Size                           | (1024, 1024)          |



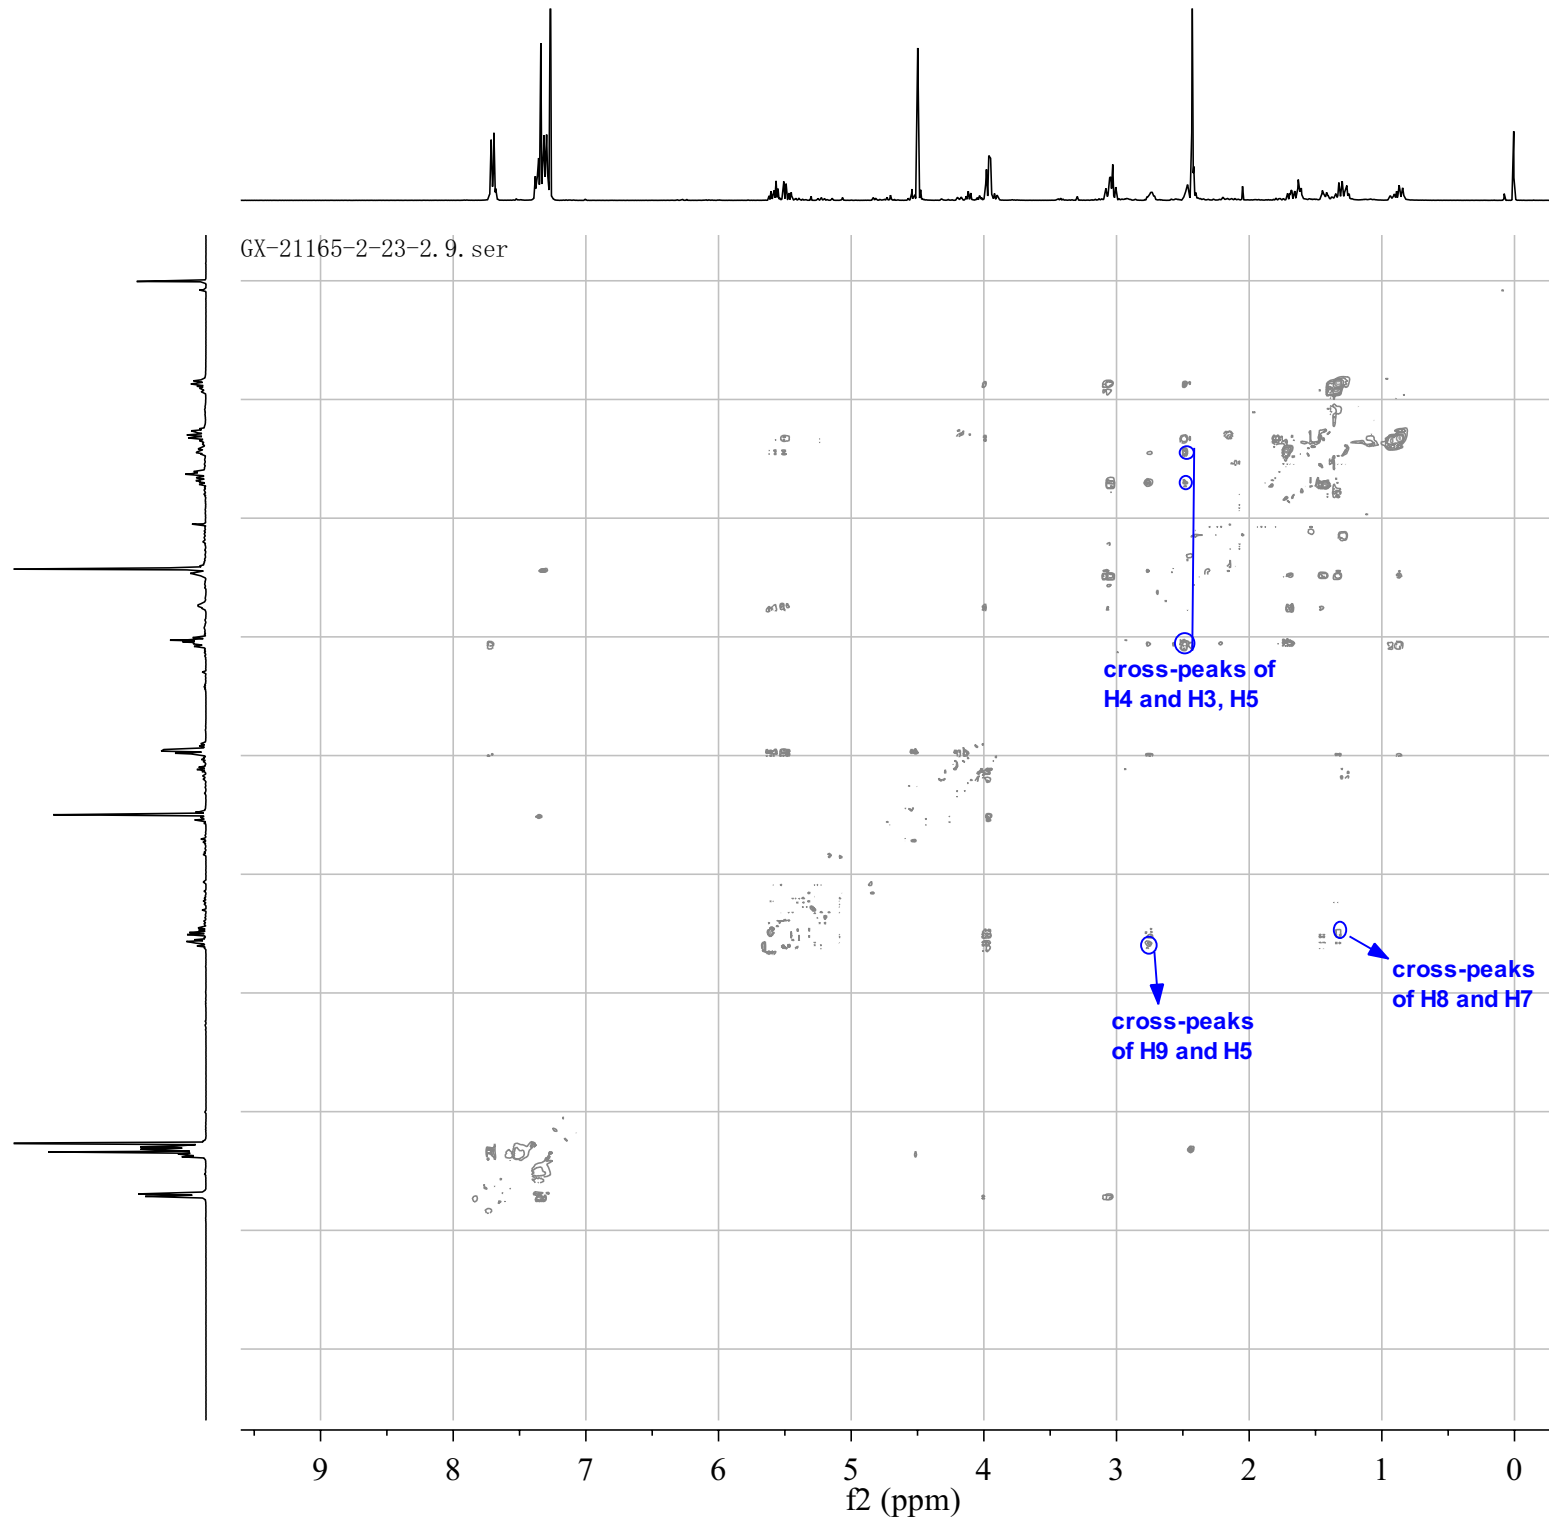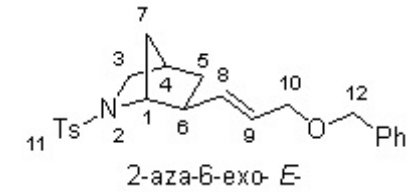

| Parameter               | Value                 |
|-------------------------|-----------------------|
| Title                   | GX-21165-2-23-2.9.ser |
| Comment                 |                       |
| Origin                  | Bruker BioSpin GmbH   |
| Owner                   | nmr                   |
| Site                    |                       |
| Instrument              | spect                 |
| Solvent                 | CDCl3                 |
| Temperature             | 294.9                 |
| Pulse Sequence          | noesygpphp            |
| Experiment              | NOESY                 |
| Number of Scans         | 4                     |
| Receiver Gain           | 62.3                  |
| Relaxation Delay        | 2.0000                |
| Pulse Width             | 9.1500                |
| Presaturation Frequency |                       |
| Acquisition Time        | 0.2560                |
| Acquisition Date        | 2021-10-10T15:00:10   |
| Modification Date       | 2021-12-29T13:11:46   |
| Spectrometer Frequency  | (400.13, 400.13)      |
| Spectral Width          | (4000.0, 4000.0)      |
| Lowest Frequency        | (-158.1, -158.1)      |
| Nucleus                 | (1H, 1H)              |
| Acquired Size           | (1024, 200)           |
| Spectral Size           | (1024, 1024)          |

GX-21165-2-27-2.9.fid

| Parameter               | Value                 |
|-------------------------|-----------------------|
| Title                   | GX-21165-2-27-2.9.fid |
| Comment                 |                       |
| Origin                  | Bruker BioSpin GmbH   |
| Owner                   | nmr                   |
| Site                    |                       |
| Instrument              | spect                 |
| Solvent                 | CDC13                 |
| Temperature             | 296.2                 |
| Pulse Sequence          | zg30                  |
| Experiment              | 1D                    |
| Number of Scans         | 16                    |
| Receiver Gain           | 70.5                  |
| Relaxation Delay        | 1.0000                |
| Pulse Width             | 11.3200               |
| Presaturation Frequency |                       |
| Acquisition Time        | 3.2768                |
| Acquisition Date        | 2021-10-10T15:02:01   |
| Modification Date       | 2021-10-10T16:01:53   |
| Spectrometer Frequency  | 500.13                |
| Spectral Width          | 10000.0               |
| Lowest Frequency        | -1922.4               |
| Nucleus                 | 1H                    |
| Acquired Size           | 32768                 |
| Spectral Size           | 65536                 |

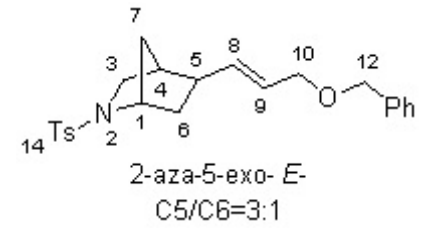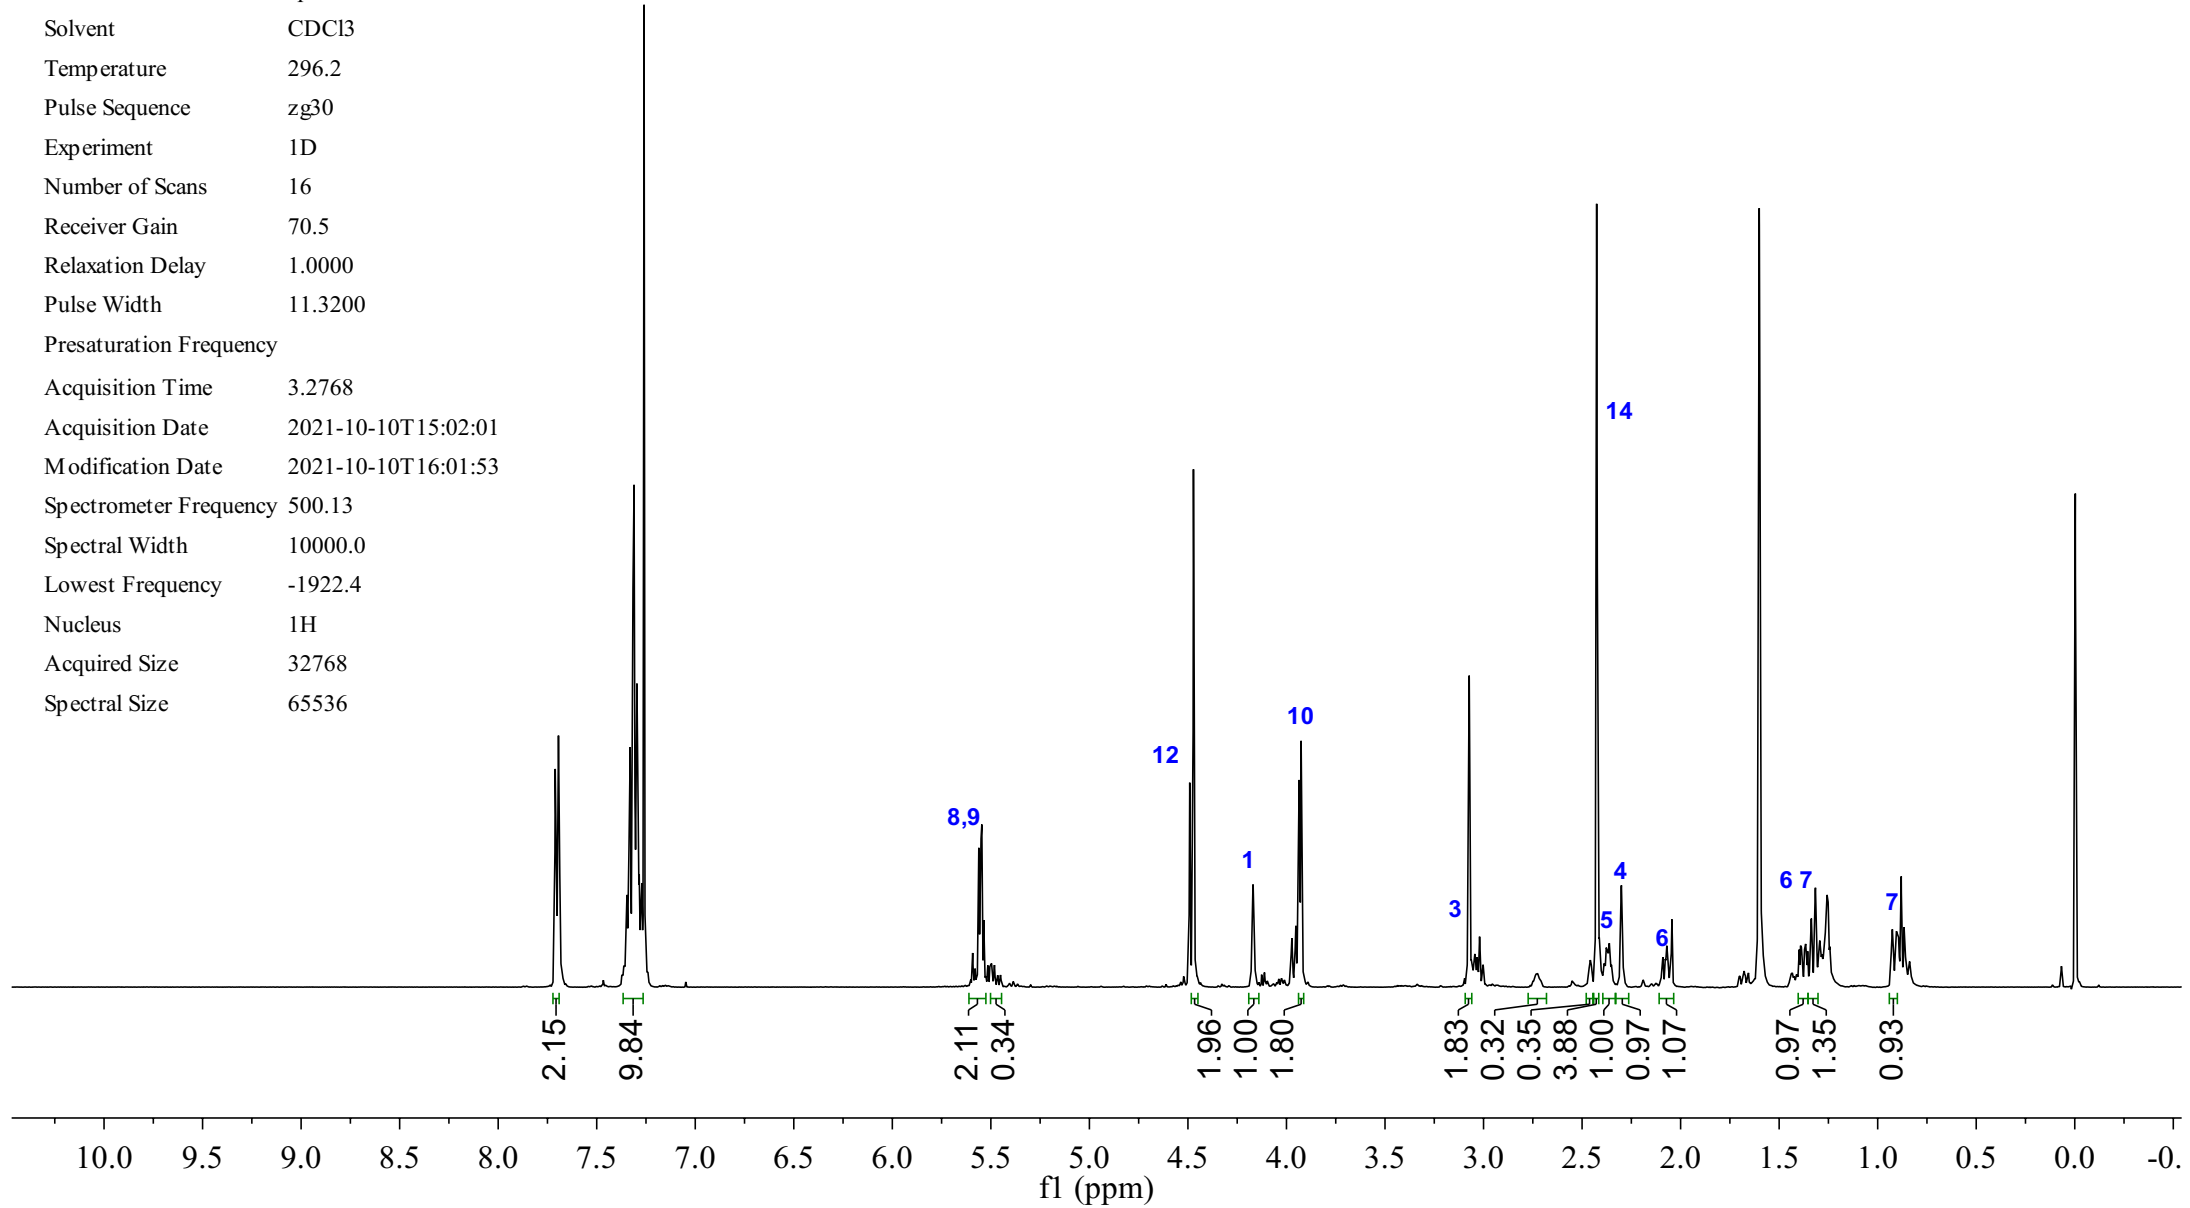

| Parameter               | Value                 |
|-------------------------|-----------------------|
| Title                   | GX-21165-2-27-2.4.fid |
| Comment                 |                       |
| Origin                  | Bruker BioSpin GmbH   |
| Owner                   | nmr                   |
| Site                    |                       |
| Instrument              | spect                 |
| Solvent                 | CDC13                 |
| Temperature             | 296.1                 |
| Pulse Sequence          | zpgg30                |
| Experiment              | 1D                    |
| Number of Scans         | 64                    |
| Receiver Gain           | 193.1                 |
| Relaxation Delay        | 2.0000                |
| Pulse Width             | 9.9400                |
| Presaturation Frequency |                       |
| Acquisition Time        | 1.1010                |
| Acquisition Date        | 2021-09-28T17:45:59   |
| Modification Date       | 2021-12-29T13:12:22   |
| Spectrometer Frequency  | 125.77                |
| Spectral Width          | 29761.9               |
| Lowest Frequency        | -2305.8               |
| Nucleus                 | 13C                   |
| Acquired Size           | 32768                 |
| Spectral Size           | 65536                 |

143.4  
138.3  
137.0  
135.8  
129.8  
128.5  
127.9  
127.8  
127.6  
125.8

72.4  
70.7  
60.3  
54.2  
43.3  
42.7  
39.0  
34.3  
21.7

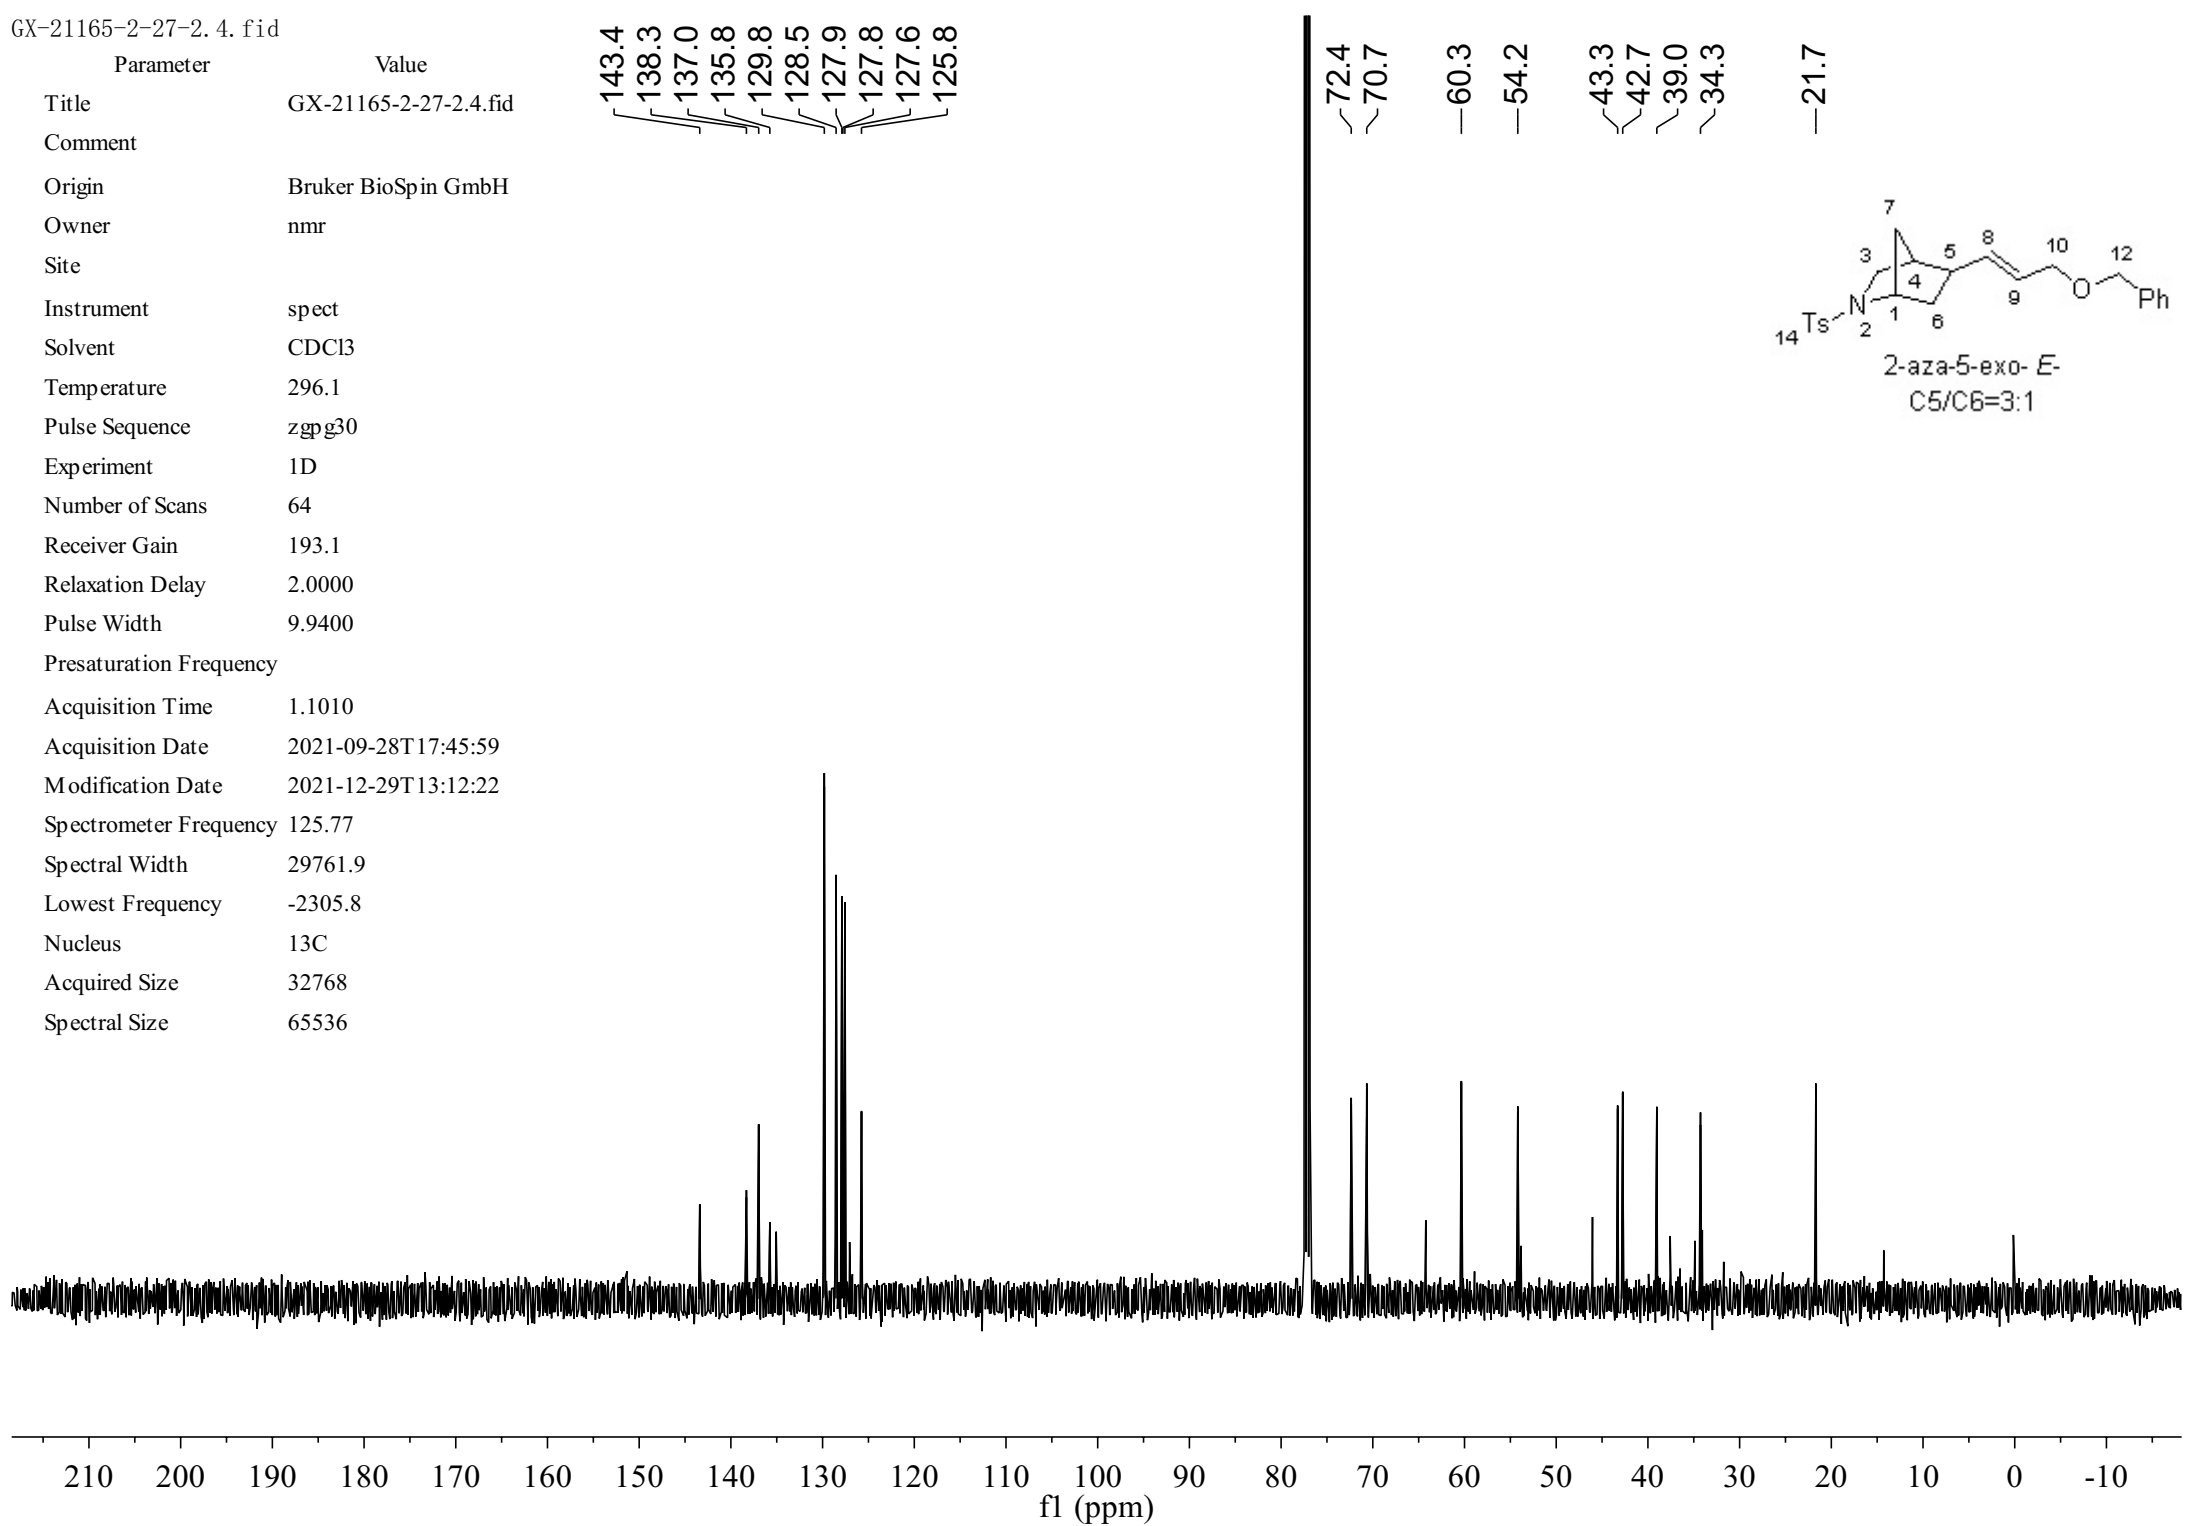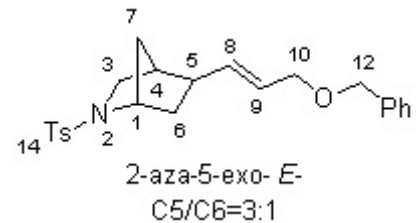

GX-21165-2-27-2.5.fid

| Parameter               | Value                 |
|-------------------------|-----------------------|
| Title                   | GX-21165-2-27-2.5.fid |
| Comment                 |                       |
| Origin                  | Bruker BioSpin GmbH   |
| Owner                   | nmr                   |
| Site                    |                       |
| Instrument              | spect                 |
| Solvent                 | CDC13                 |
| Temperature             | 296.1                 |
| Pulse Sequence          | deptsp135             |
| Experiment              | DEPT-135              |
| Number of Scans         | 64                    |
| Receiver Gain           | 193.1                 |
| Relaxation Delay        | 2.0000                |
| Pulse Width             | 9.9400                |
| Presaturation Frequency |                       |
| Acquisition Time        | 1.6253                |
| Acquisition Date        | 2021-09-28T17:51:07   |
| Modification Date       | 2021-12-29T13:12:22   |
| Spectrometer Frequency  | 125.77                |
| Spectral Width          | 20161.3               |
| Lowest Frequency        | -20.6                 |
| Nucleus                 | 13C                   |
| Acquired Size           | 32768                 |
| Spectral Size           | 65536                 |

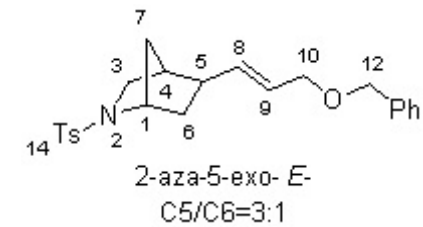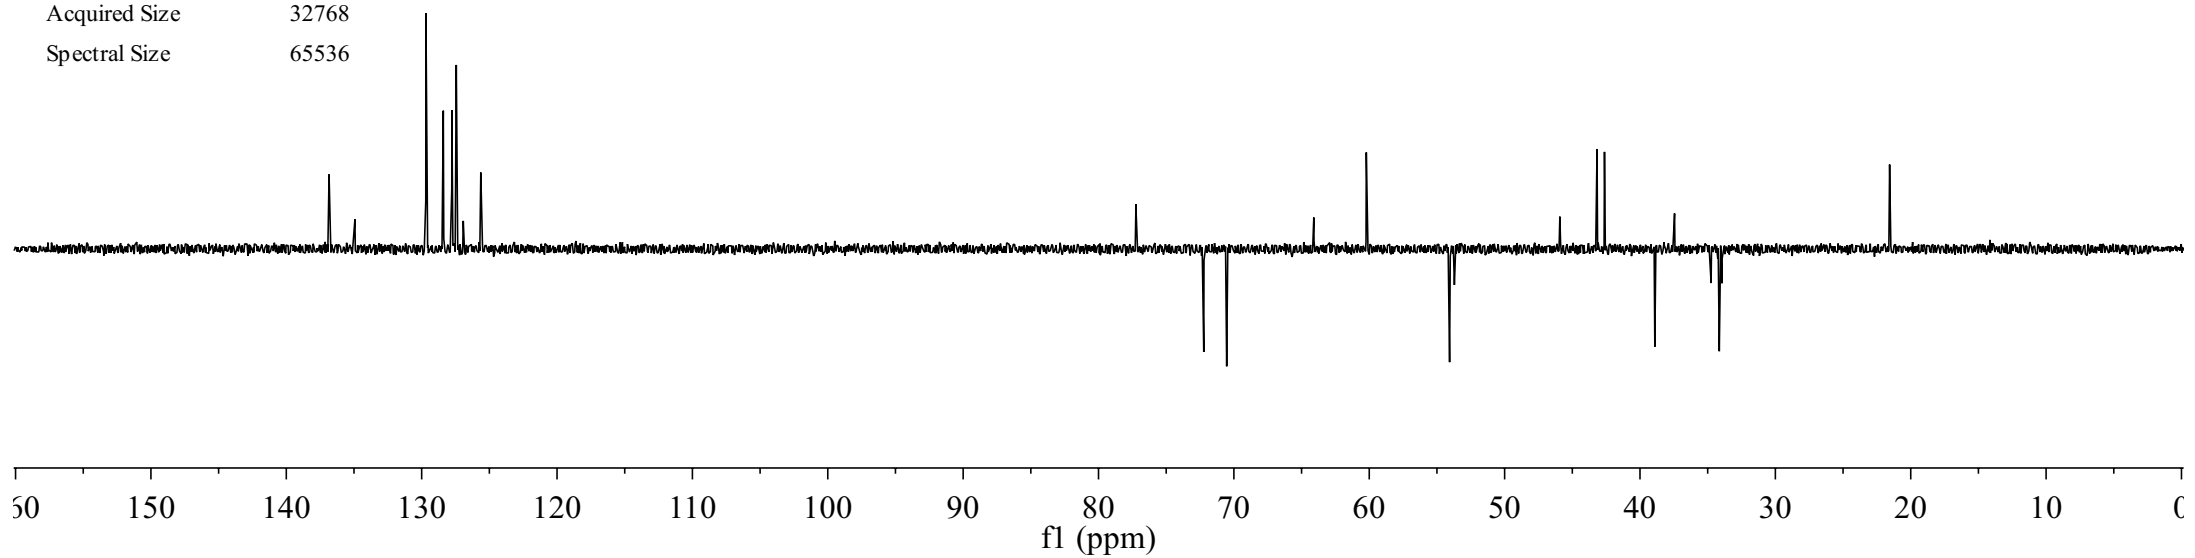

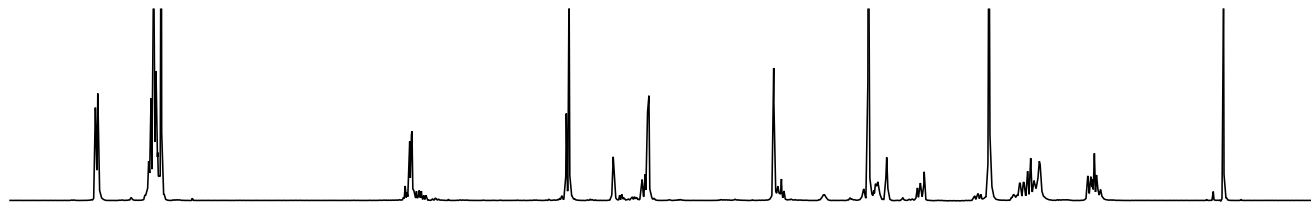

GX-21165-2-27-2.11.ser

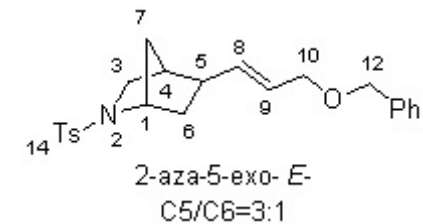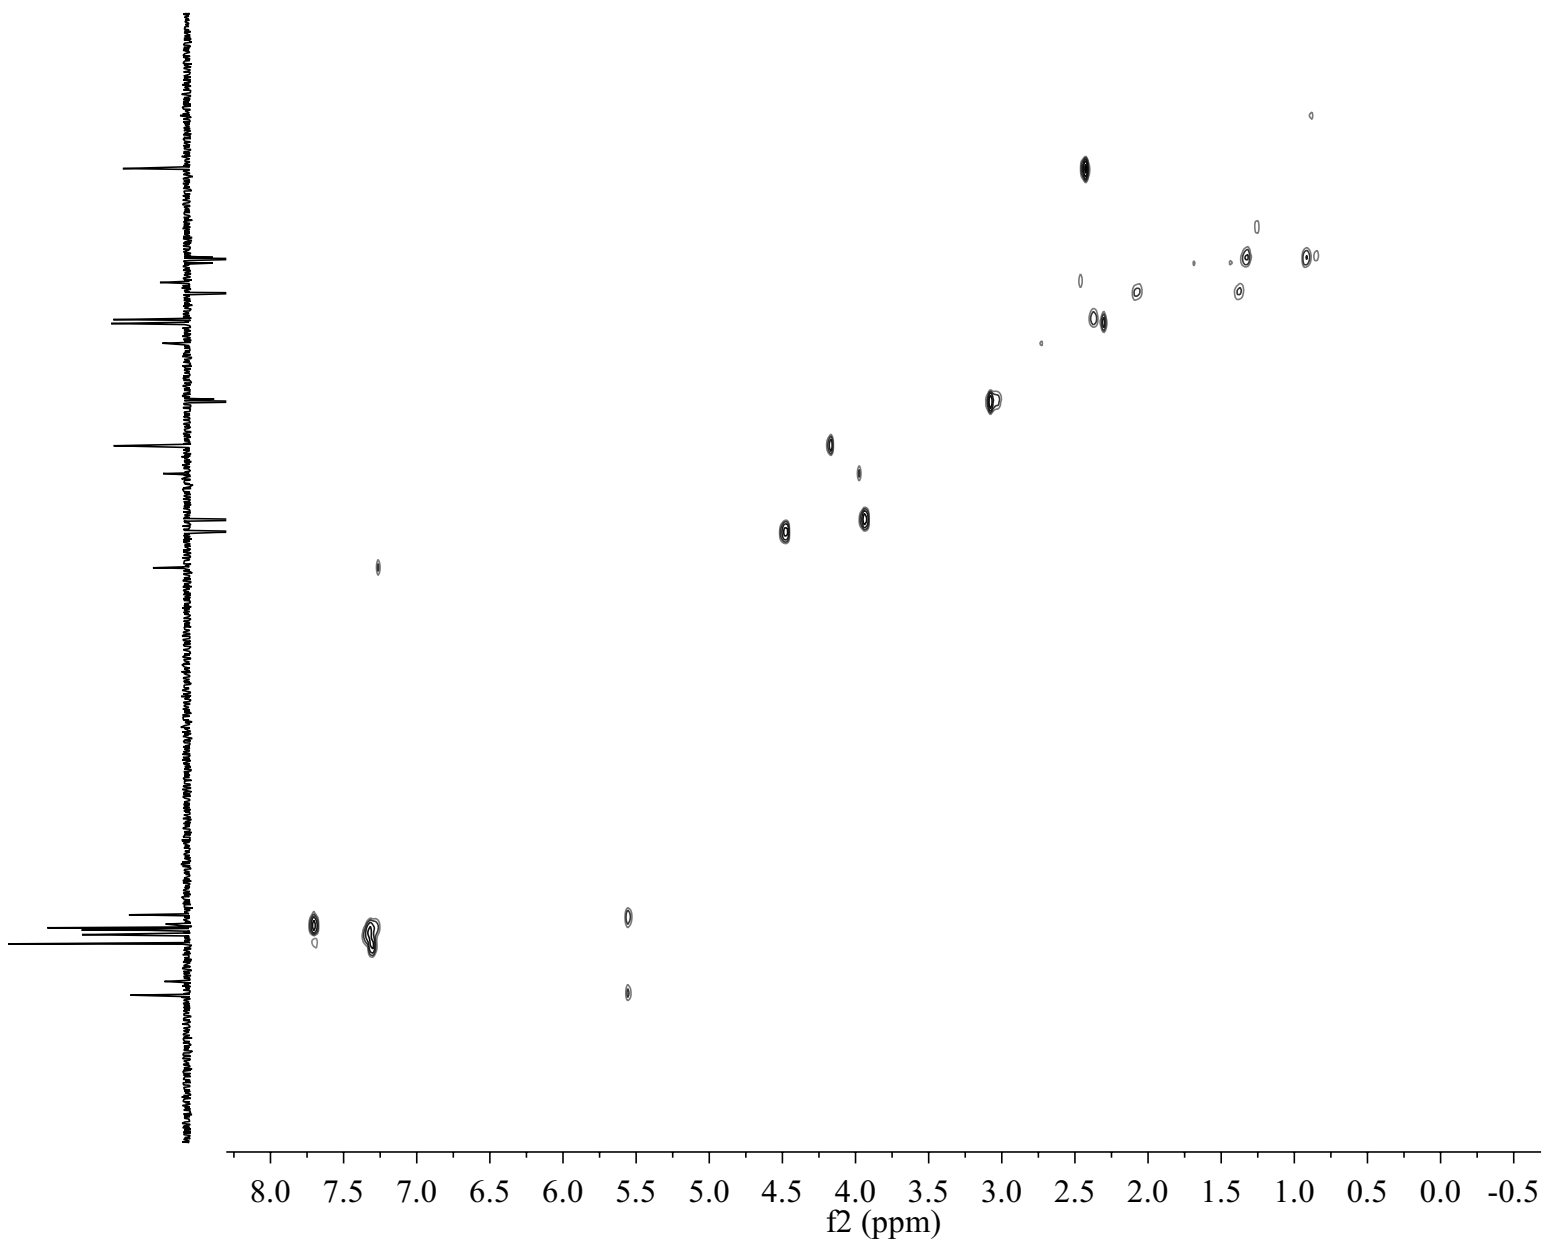

| Parameter               | Value                  |
|-------------------------|------------------------|
| Title                   | GX-21165-2-27-2.11.ser |
| Comment                 |                        |
| Origin                  | Bruker BioSpin GmbH    |
| Owner                   | nmr                    |
| Site                    |                        |
| Instrument              | spect                  |
| Solvent                 | CDCl3                  |
| Temperature             | 296.1                  |
| Pulse Sequence          | hsqcetgp               |
| Experiment              | HSQC                   |
| Number of Scans         | 2                      |
| Receiver Gain           | 193.1                  |
| Relaxation Delay        | 1.4652                 |
| Pulse Width             | 11.3200                |
| Presaturation Frequency |                        |
| Acquisition Time        | 0.1137                 |
| Acquisition Date        | 2021-10-10T15:49:34    |
| Modification Date       | 2021-10-10T16:01:53    |
| Spectrometer Frequency  | (500.13, 125.77)       |
| Spectral Width          | (4504.5, 20833.3)      |
| Lowest Frequency        | (-352.3, -1039.8)      |
| Nucleus                 | (1H, 13C)              |
| Acquired Size           | (512, 170)             |
| Spectral Size           | (512, 512)             |

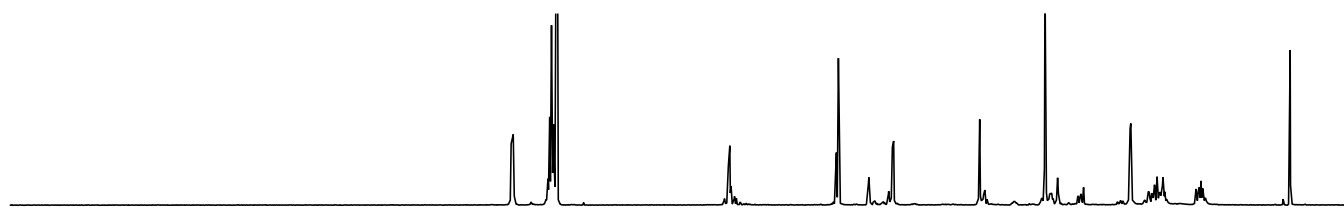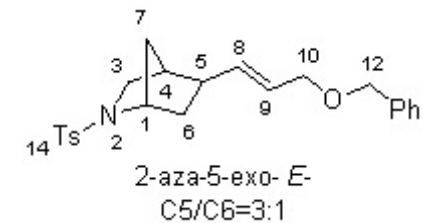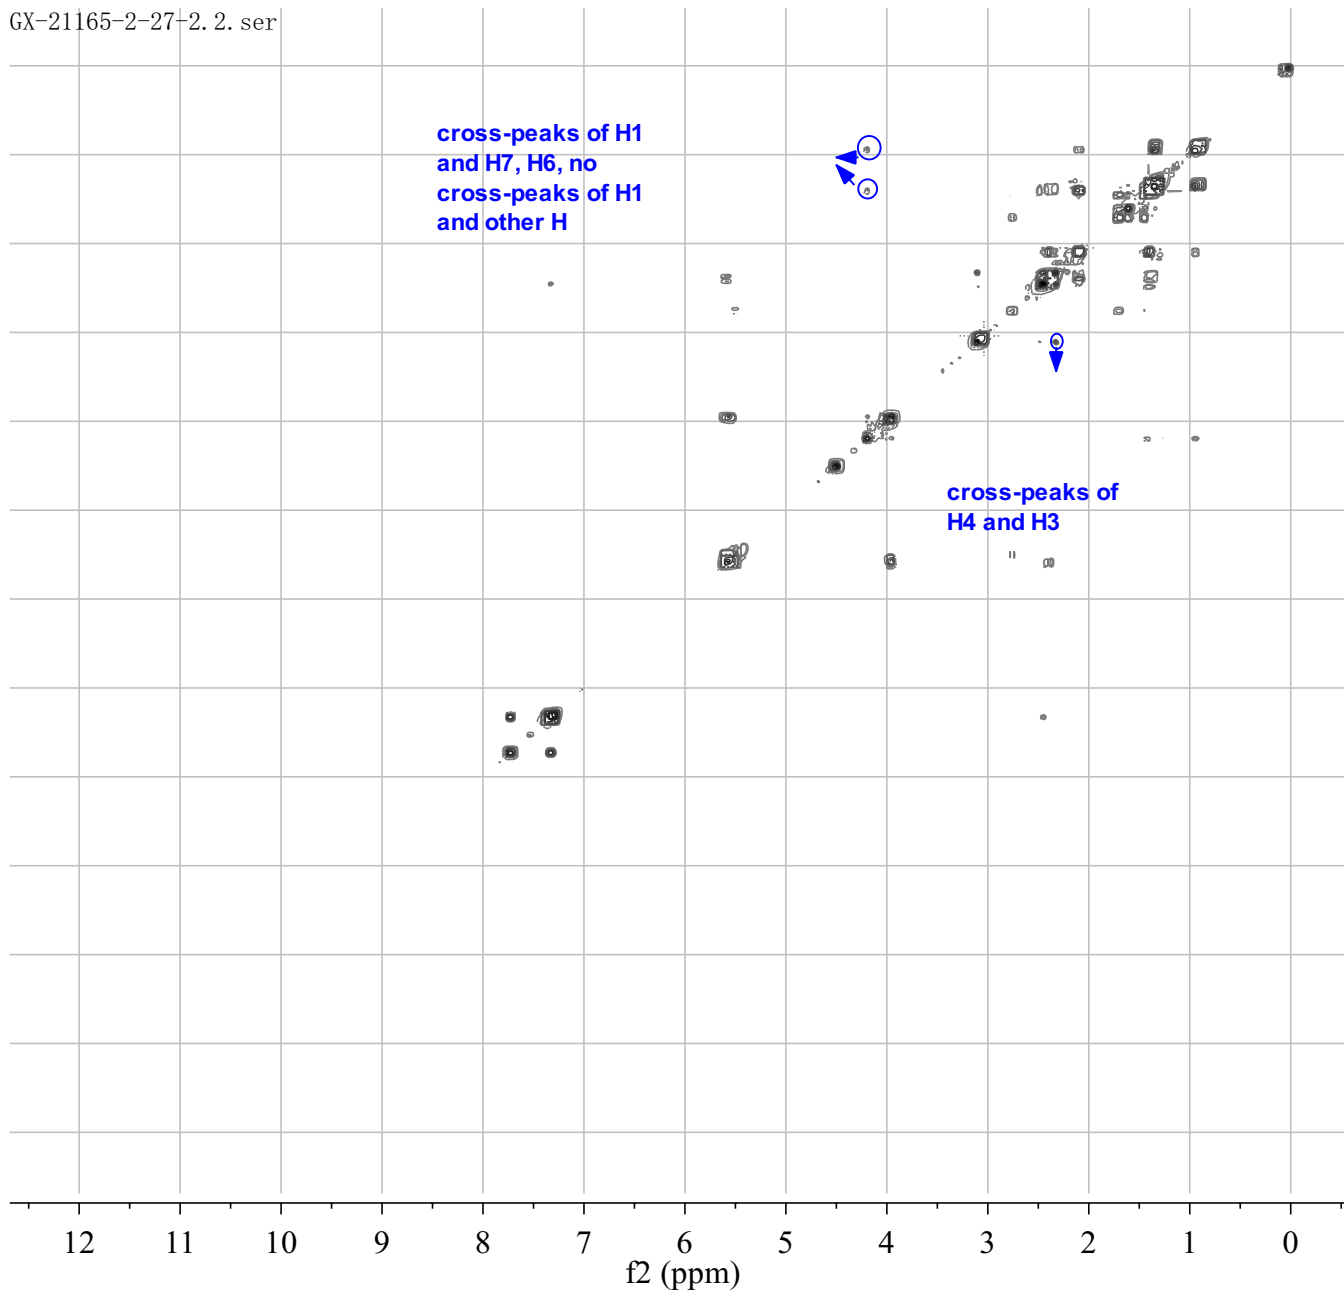

| Parameter               | Value                 |
|-------------------------|-----------------------|
| Title                   | GX-21165-2-27-2.2.ser |
| Comment                 |                       |
| Origin                  | Bruker BioSpin GmbH   |
| Owner                   | nmr                   |
| Site                    |                       |
| Instrument              | spect                 |
| Solvent                 | CDCl <sub>3</sub>     |
| Temperature             | 295.5                 |
| Pulse Sequence          | cosygpppqf            |
| Experiment              | COSY                  |
| Number of Scans         | 1                     |
| Receiver Gain           | 196.4                 |
| Relaxation Delay        | 2.0000                |
| Pulse Width             | 9.1500                |
| Presaturation Frequency |                       |
| Acquisition Time        | 0.1917                |
| Acquisition Date        | 2021-09-28T14:02:28   |
| Modification Date       | 2021-12-29T13:12:20   |
| Spectrometer Frequency  | (400.13, 400.13)      |
| Spectral Width          | (5341.9, 5341.9)      |
| Lowest Frequency        | (-265.3, -265.3)      |
| Nucleus                 | (1H, 1H)              |
| Acquired Size           | (1024, 128)           |
| Spectral Size           | (1024, 1024)          |

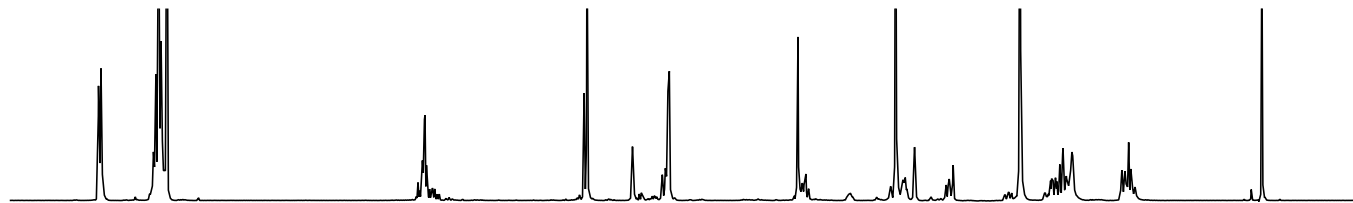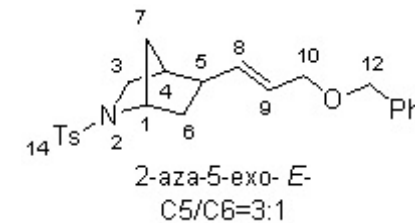

GX-21165-2-27-2.10.ser

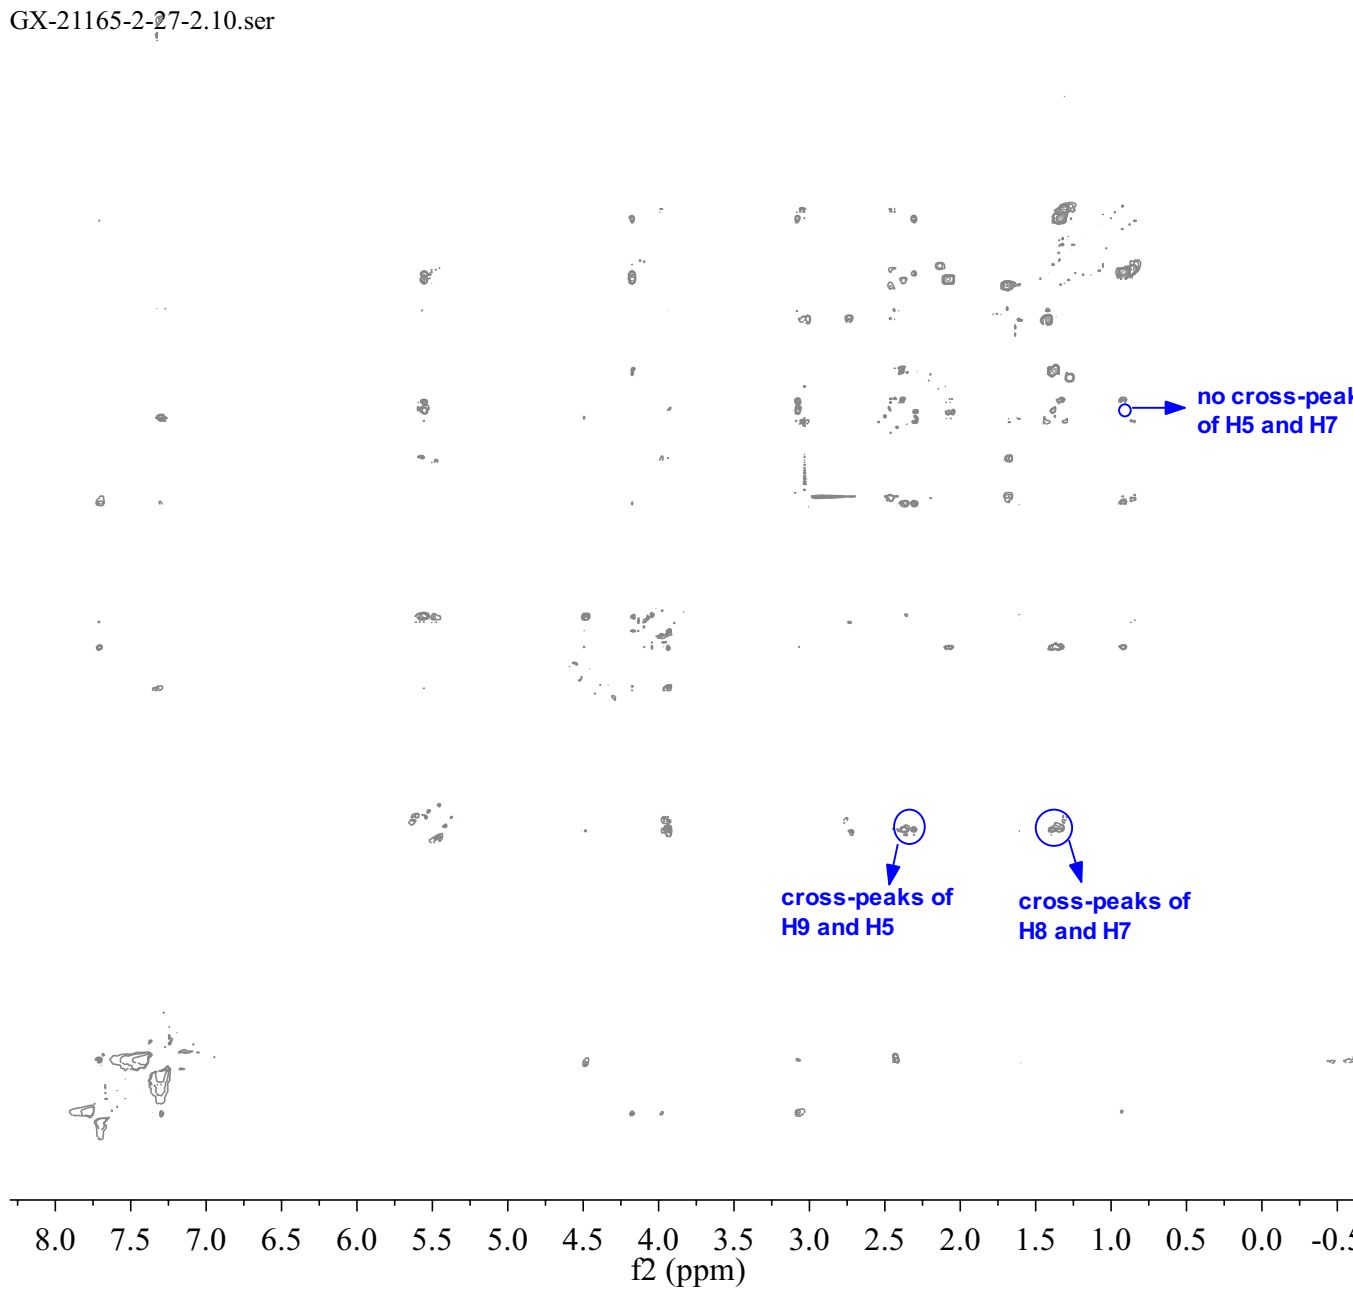

| Parameter               | Value                             |
|-------------------------|-----------------------------------|
| Title                   | GX-21165-2-27-2.10.ser            |
| Comment                 |                                   |
| Origin                  | Bruker BioSpin GmbH               |
| Owner                   | nmr                               |
| Site                    |                                   |
| Instrument              | spect                             |
| Solvent                 | CDCl <sub>3</sub>                 |
| Temperature             | 296.1                             |
| Pulse Sequence          | noesygp ppp                       |
| Experiment              | NOESY                             |
| Number of Scans         | 4                                 |
| Receiver Gain           | 31.1                              |
| Relaxation Delay        | 1.9775                            |
| Pulse Width             | 11.3200                           |
| Presaturation Frequency |                                   |
| Acquisition Time        | 0.2273                            |
| Acquisition Date        | 2021-10-10T15:04:26               |
| Modification Date       | 2021-10-10T16:01:55               |
| Spectrometer Frequency  | (500.13, 500.13)                  |
| Spectral Width          | (4504.5, 4504.5)                  |
| Lowest Frequency        | (-352.3, -352.3)                  |
| Nucleus                 | ( <sup>1</sup> H, <sup>1</sup> H) |
| Acquired Size           | (1024, 256)                       |
| Spectral Size           | (1024, 1024)                      |

YM-20240429-9-iso-2.1.fid

s55-63

| Parameter               | Value                     |
|-------------------------|---------------------------|
| Title                   | YM-20240429-9-iso-2.1.fid |
| Comment                 | s55-63                    |
| Origin                  | Bruker BioSpin GmbH       |
| Owner                   | PC                        |
| Site                    |                           |
| Instrument              | spect                     |
| Solvent                 | CDC13                     |
| Temperature             | 298.4                     |
| Pulse Sequence          | zg30                      |
| Experiment              | 1D                        |
| Number of Scans         | 8                         |
| Receiver Gain           | 196.4                     |
| Relaxation Delay        | 1.0000                    |
| Pulse Width             | 9.2600                    |
| Presaturation Frequency |                           |
| Acquisition Time        | 1.9999                    |
| Acquisition Date        | 2024-05-21T04:50:16       |
| Modification Date       | 2024-05-21T14:27:03       |
| Spectrometer Frequency  | 400.13                    |
| Spectral Width          | 8012.8                    |
| Lowest Frequency        | -1535.1                   |
| Nucleus                 | 1H                        |
| Acquired Size           | 16025                     |
| Spectral Size           | 65536                     |

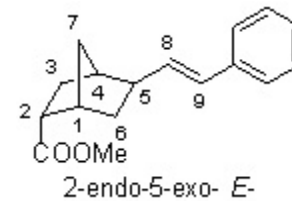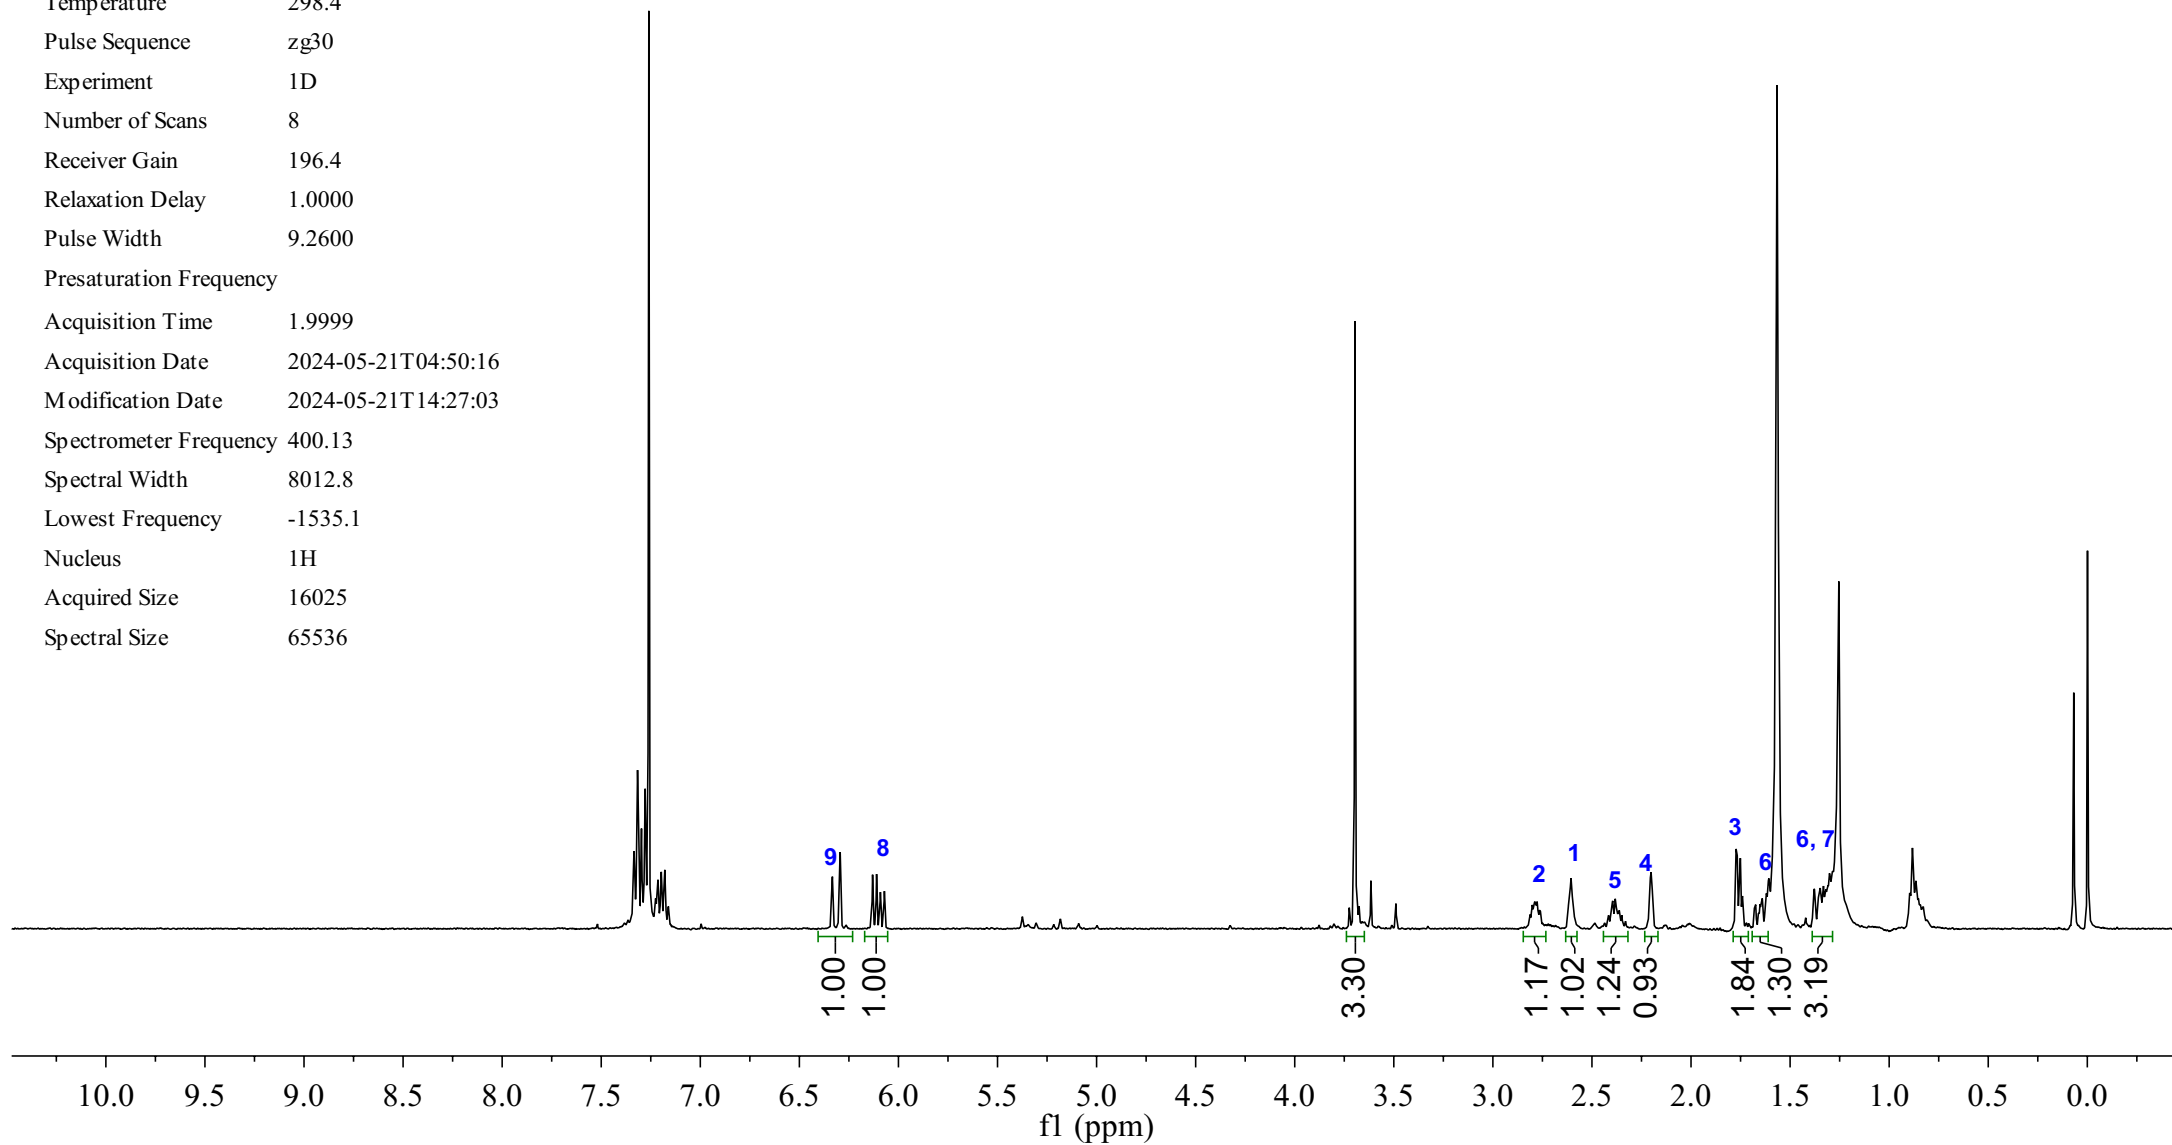



—175.5

137.9  
135.7  
128.6  
128.0  
127.0  
126.1

51.7  
45.4  
44.8  
43.3  
40.9  
37.8  
33.3  
32.3

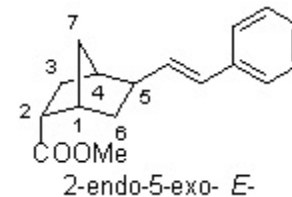

| Parameter               | Value                      |
|-------------------------|----------------------------|
| Title                   | YM-20240429-9-iso-2.12.fid |
| Comment                 | s55-62                     |
| Origin                  | Bruker BioSpin GmbH        |
| Owner                   | nmr                        |
| Site                    |                            |
| Instrument              | spect                      |
| Solvent                 | CDCl3                      |
| Temperature             | 296.1                      |
| Pulse Sequence          | zgpg30                     |
| Experiment              | 1D                         |
| Number of Scans         | 349                        |
| Receiver Gain           | 193.1                      |
| Relaxation Delay        | 2.0000                     |
| Pulse Width             | 9.9400                     |
| Presaturation Frequency |                            |
| Acquisition Time        | 1.1010                     |
| Acquisition Date        | 2024-06-29T12:22:25        |
| Modification Date       | 2024-06-29T13:21:29        |
| Spectrometer Frequency  | 125.77                     |
| Spectral Width          | 29761.9                    |
| Lowest Frequency        | -2289.2                    |
| Nucleus                 | <sup>13</sup> C            |
| Acquired Size           | 32768                      |
| Spectral Size           | 65536                      |

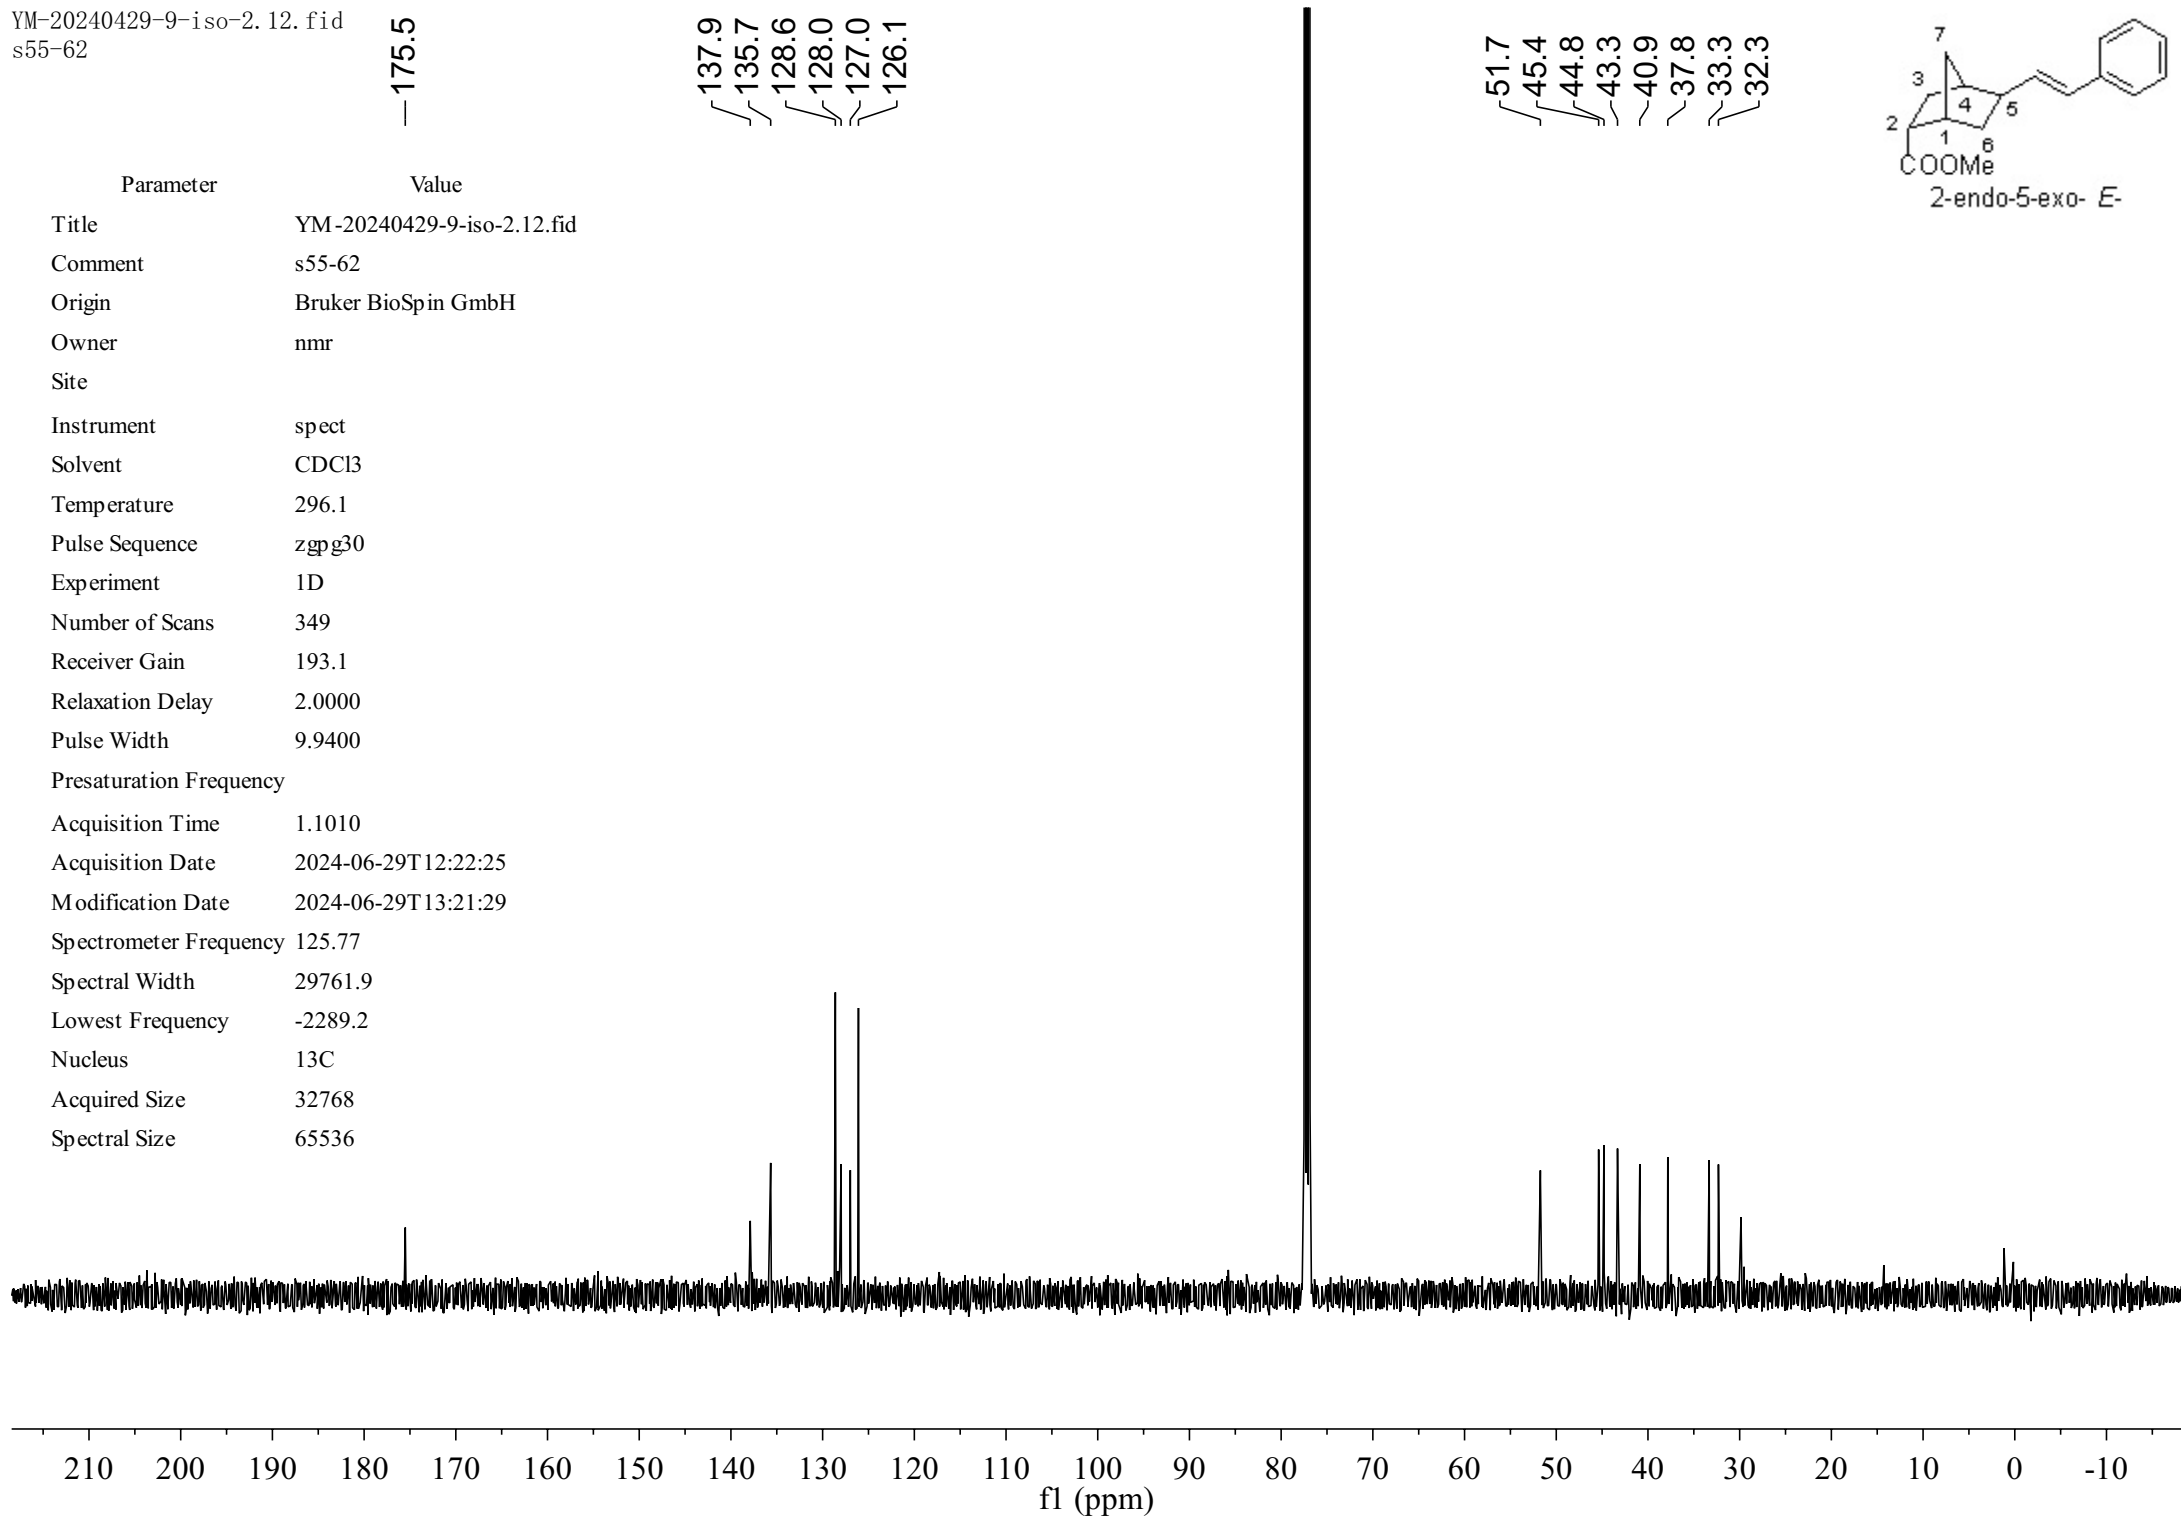

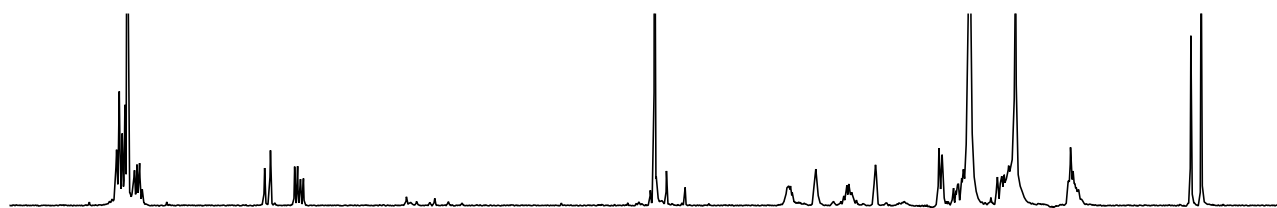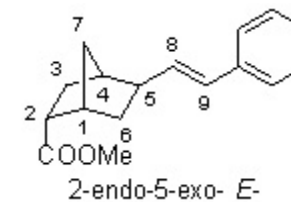

YM-20240429-9-iso-2.2.ser  
s55-63

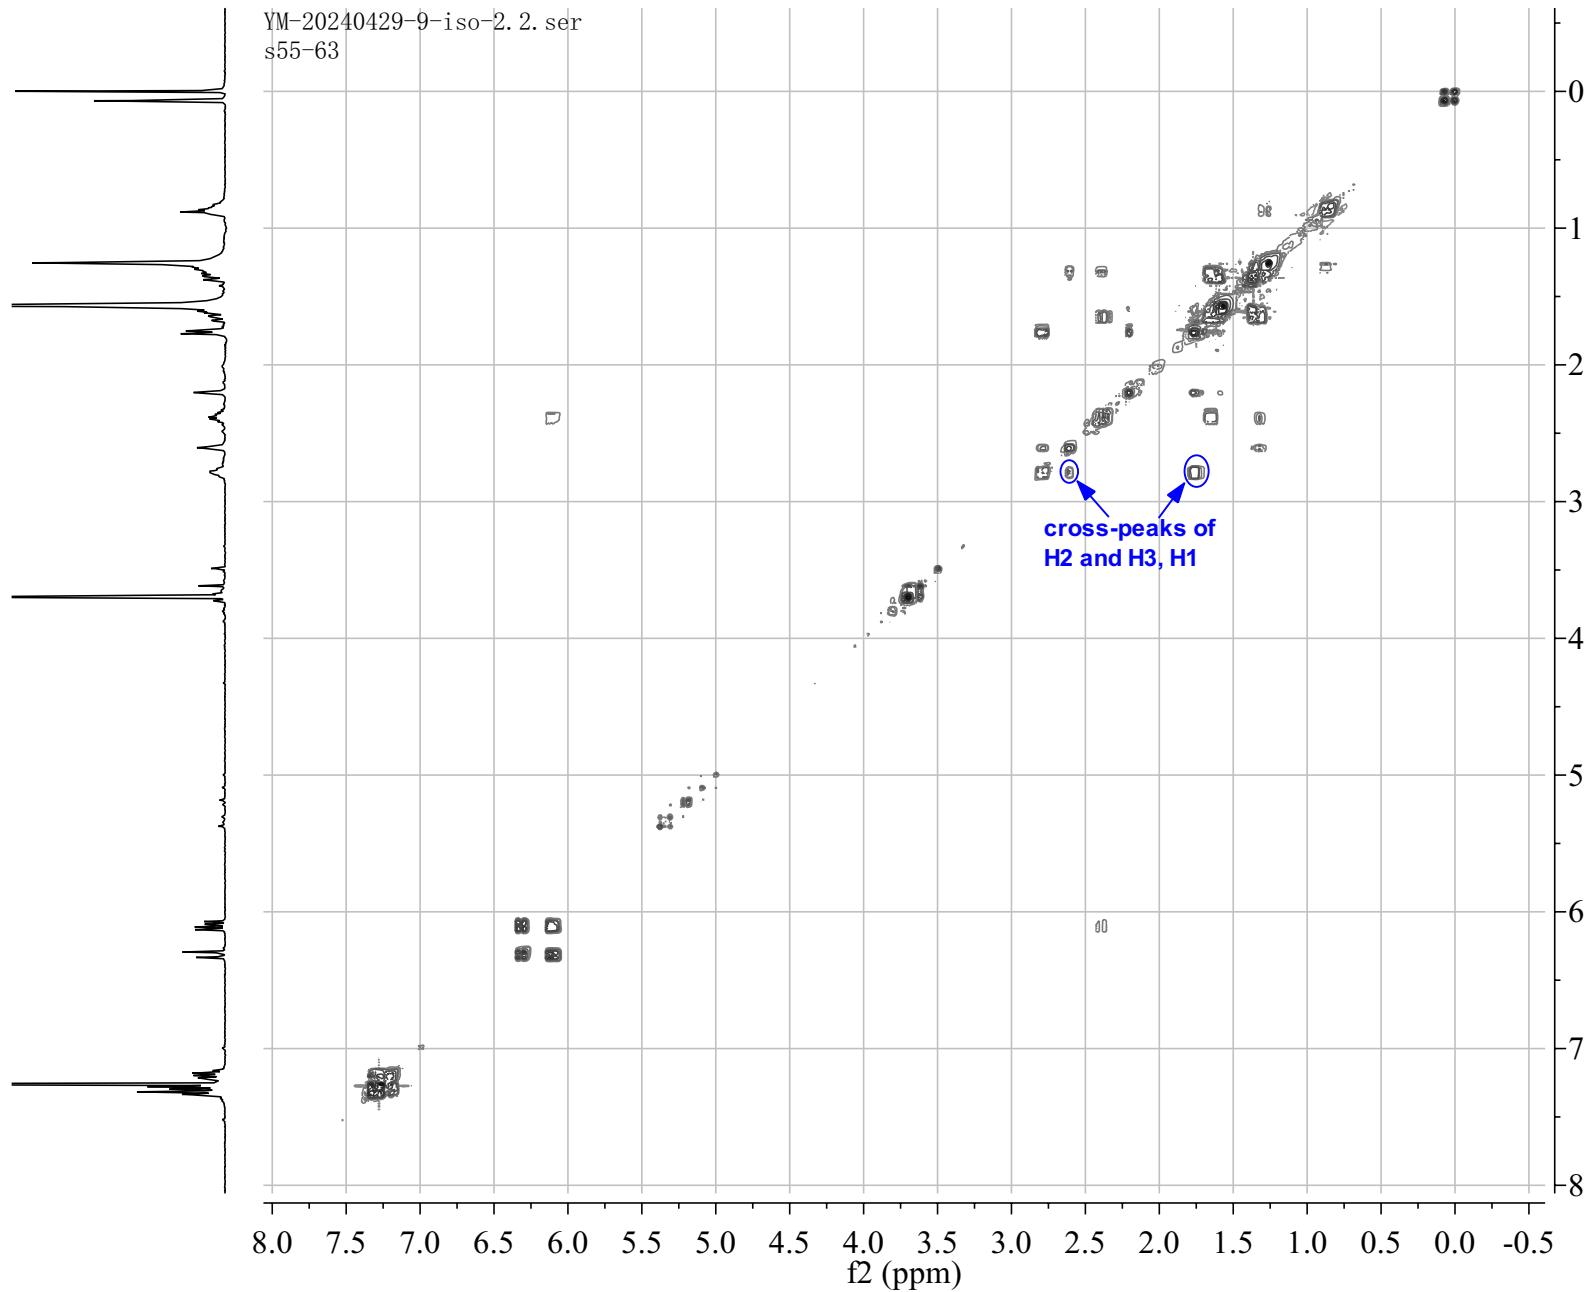

| Parameter               | Value                     |
|-------------------------|---------------------------|
| Title                   | YM-20240429-9-iso-2.2.ser |
| Comment                 | s55-63                    |
| Origin                  | Bruker BioSpin GmbH       |
| Owner                   | PC                        |
| Site                    |                           |
| Instrument              | spect                     |
| Solvent                 | CDC13                     |
| Temperature             | 298.4                     |
| Pulse Sequence          | cosygpqqf                 |
| Experiment              | COSY                      |
| Number of Scans         | 1                         |
| Receiver Gain           | 62.3                      |
| Relaxation Delay        | 1.8968                    |
| Pulse Width             | 9.2600                    |
| Presaturation Frequency |                           |
| Acquisition Time        | 0.2949                    |
| Acquisition Date        | 2024-05-21T04:51:11       |
| Modification Date       | 2024-05-21T14:27:03       |
| Spectrometer Frequency  | (400.13, 400.13)          |
| Spectral Width          | (3472.2, 3472.2)          |
| Lowest Frequency        | (-247.4, -247.4)          |
| Nucleus                 | (1H, 1H)                  |
| Acquired Size           | (1024, 128)               |
| Spectral Size           | (1024, 1024)              |

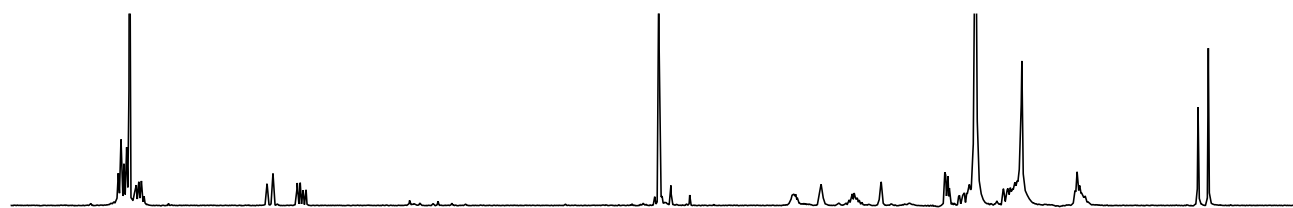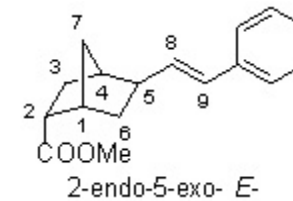

YM-20240429-9-iso-2.3.ser  
s55-63

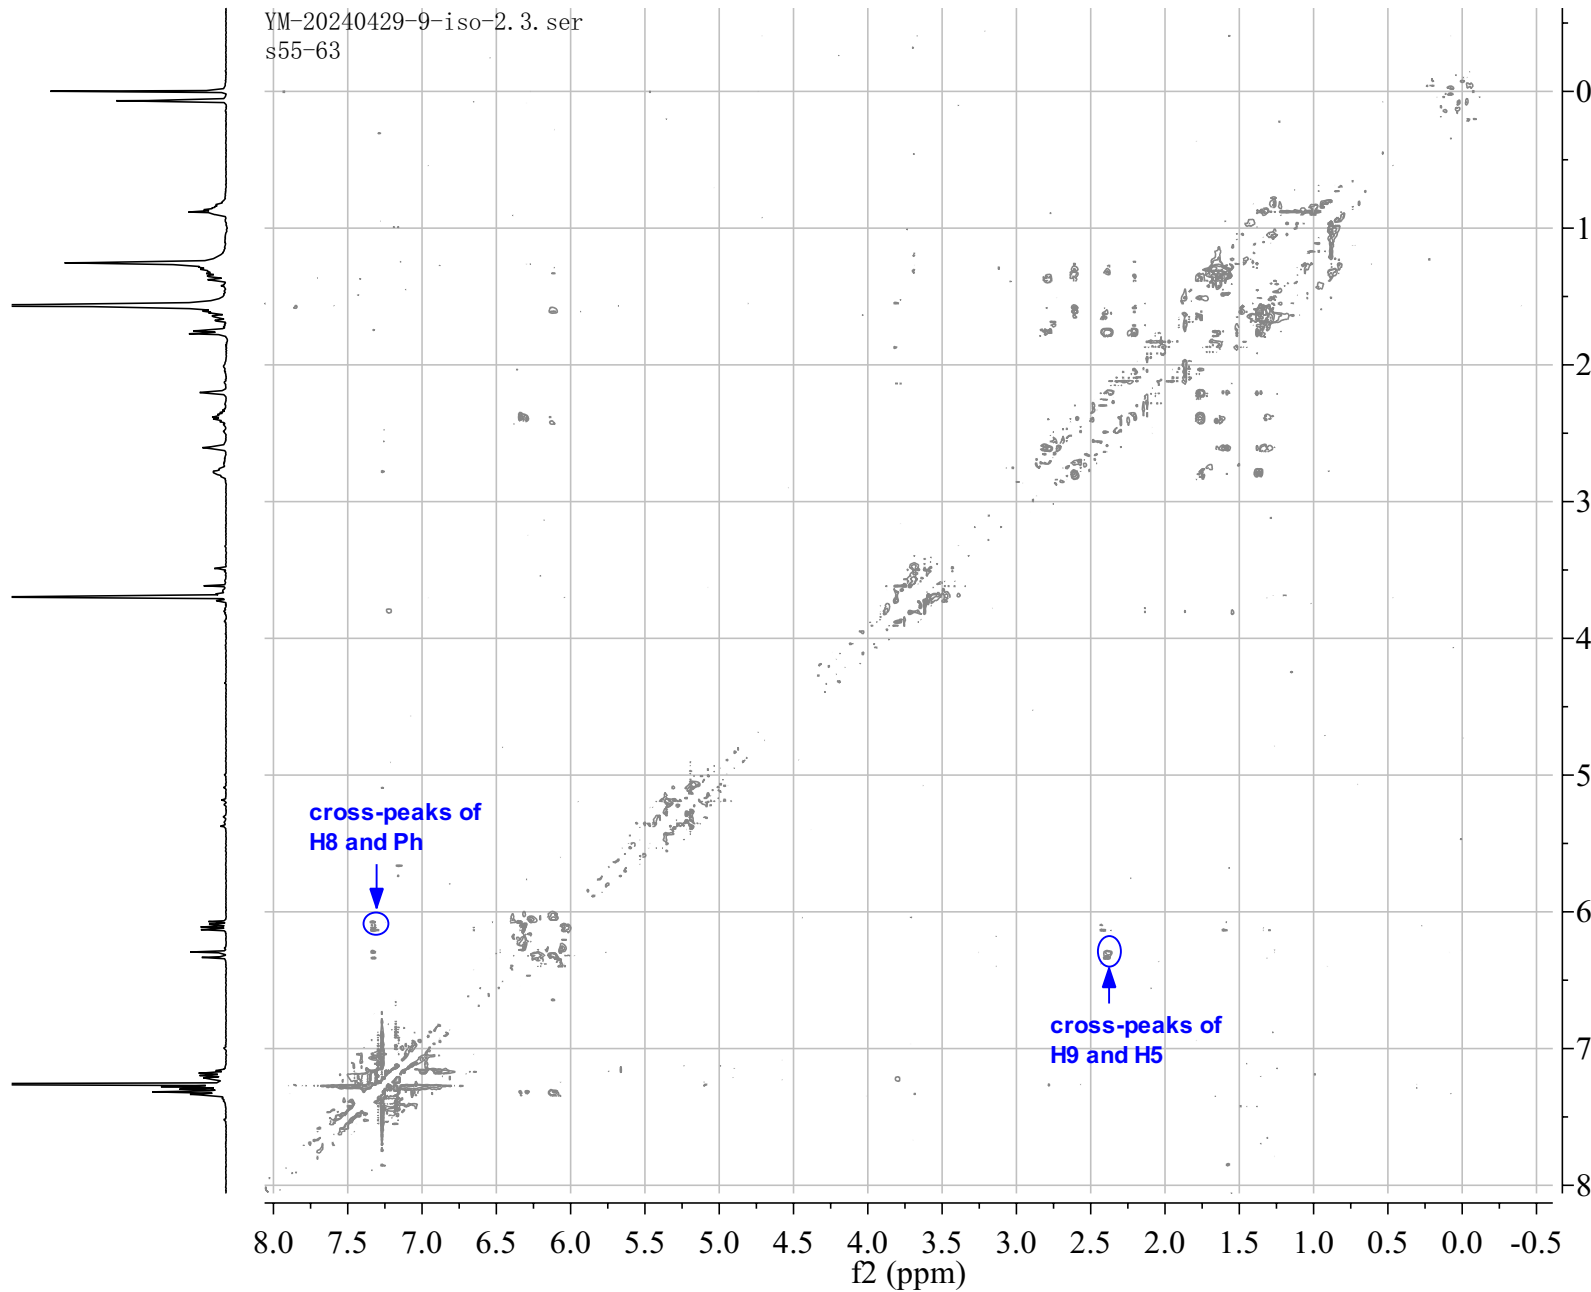

| Parameter               | Value                     |
|-------------------------|---------------------------|
| Title                   | YM-20240429-9-iso-2.3.ser |
| Comment                 | s55-63                    |
| Origin                  | Bruker BioSpin GmbH       |
| Owner                   | PC                        |
| Site                    |                           |
| Instrument              | spect                     |
| Solvent                 | CDCl3                     |
| Temperature             | 298.3                     |
| Pulse Sequence          | noesygp phpp              |
| Experiment              | NOESY                     |
| Number of Scans         | 4                         |
| Receiver Gain           | 62.3                      |
| Relaxation Delay        | 1.9611                    |
| Pulse Width             | 9.2600                    |
| Presaturation Frequency |                           |
| Acquisition Time        | 0.2949                    |
| Acquisition Date        | 2024-05-21T04:58:07       |
| Modification Date       | 2024-05-21T14:27:04       |
| Spectrometer Frequency  | (400.13, 400.13)          |
| Spectral Width          | (3472.2, 3472.2)          |
| Lowest Frequency        | (-247.4, -247.4)          |
| Nucleus                 | (1H, 1H)                  |
| Acquired Size           | (1024, 256)               |
| Spectral Size           | (1024, 1024)              |

YM-20240619-7-iso. 18. fid

s28-40 Parameter Value

Title YM-20240619-7-iso.18.fid  
Comment s28-40  
Origin Bruker BioSpin GmbH  
Owner PC  
Site  
Instrument spect  
Solvent CDCl3  
Temperature 296.6  
Pulse Sequence zg30  
Experiment 1D  
Number of Scans 8  
Receiver Gain 196.4  
Relaxation Delay 1.0000  
Pulse Width 9.2600  
Presaturation Frequency  
Acquisition Time 1.9999  
Acquisition Date 2024-06-23T22:54:29  
Modification Date 2024-06-24T08:25:44  
Spectrometer Frequency 400.13  
Spectral Width 8012.8  
Lowest Frequency -1535.2  
Nucleus 1H  
Acquired Size 16025  
Spectral Size 65536

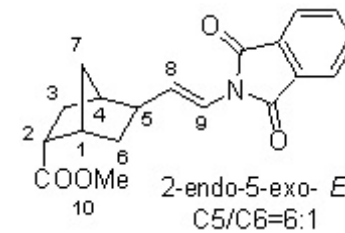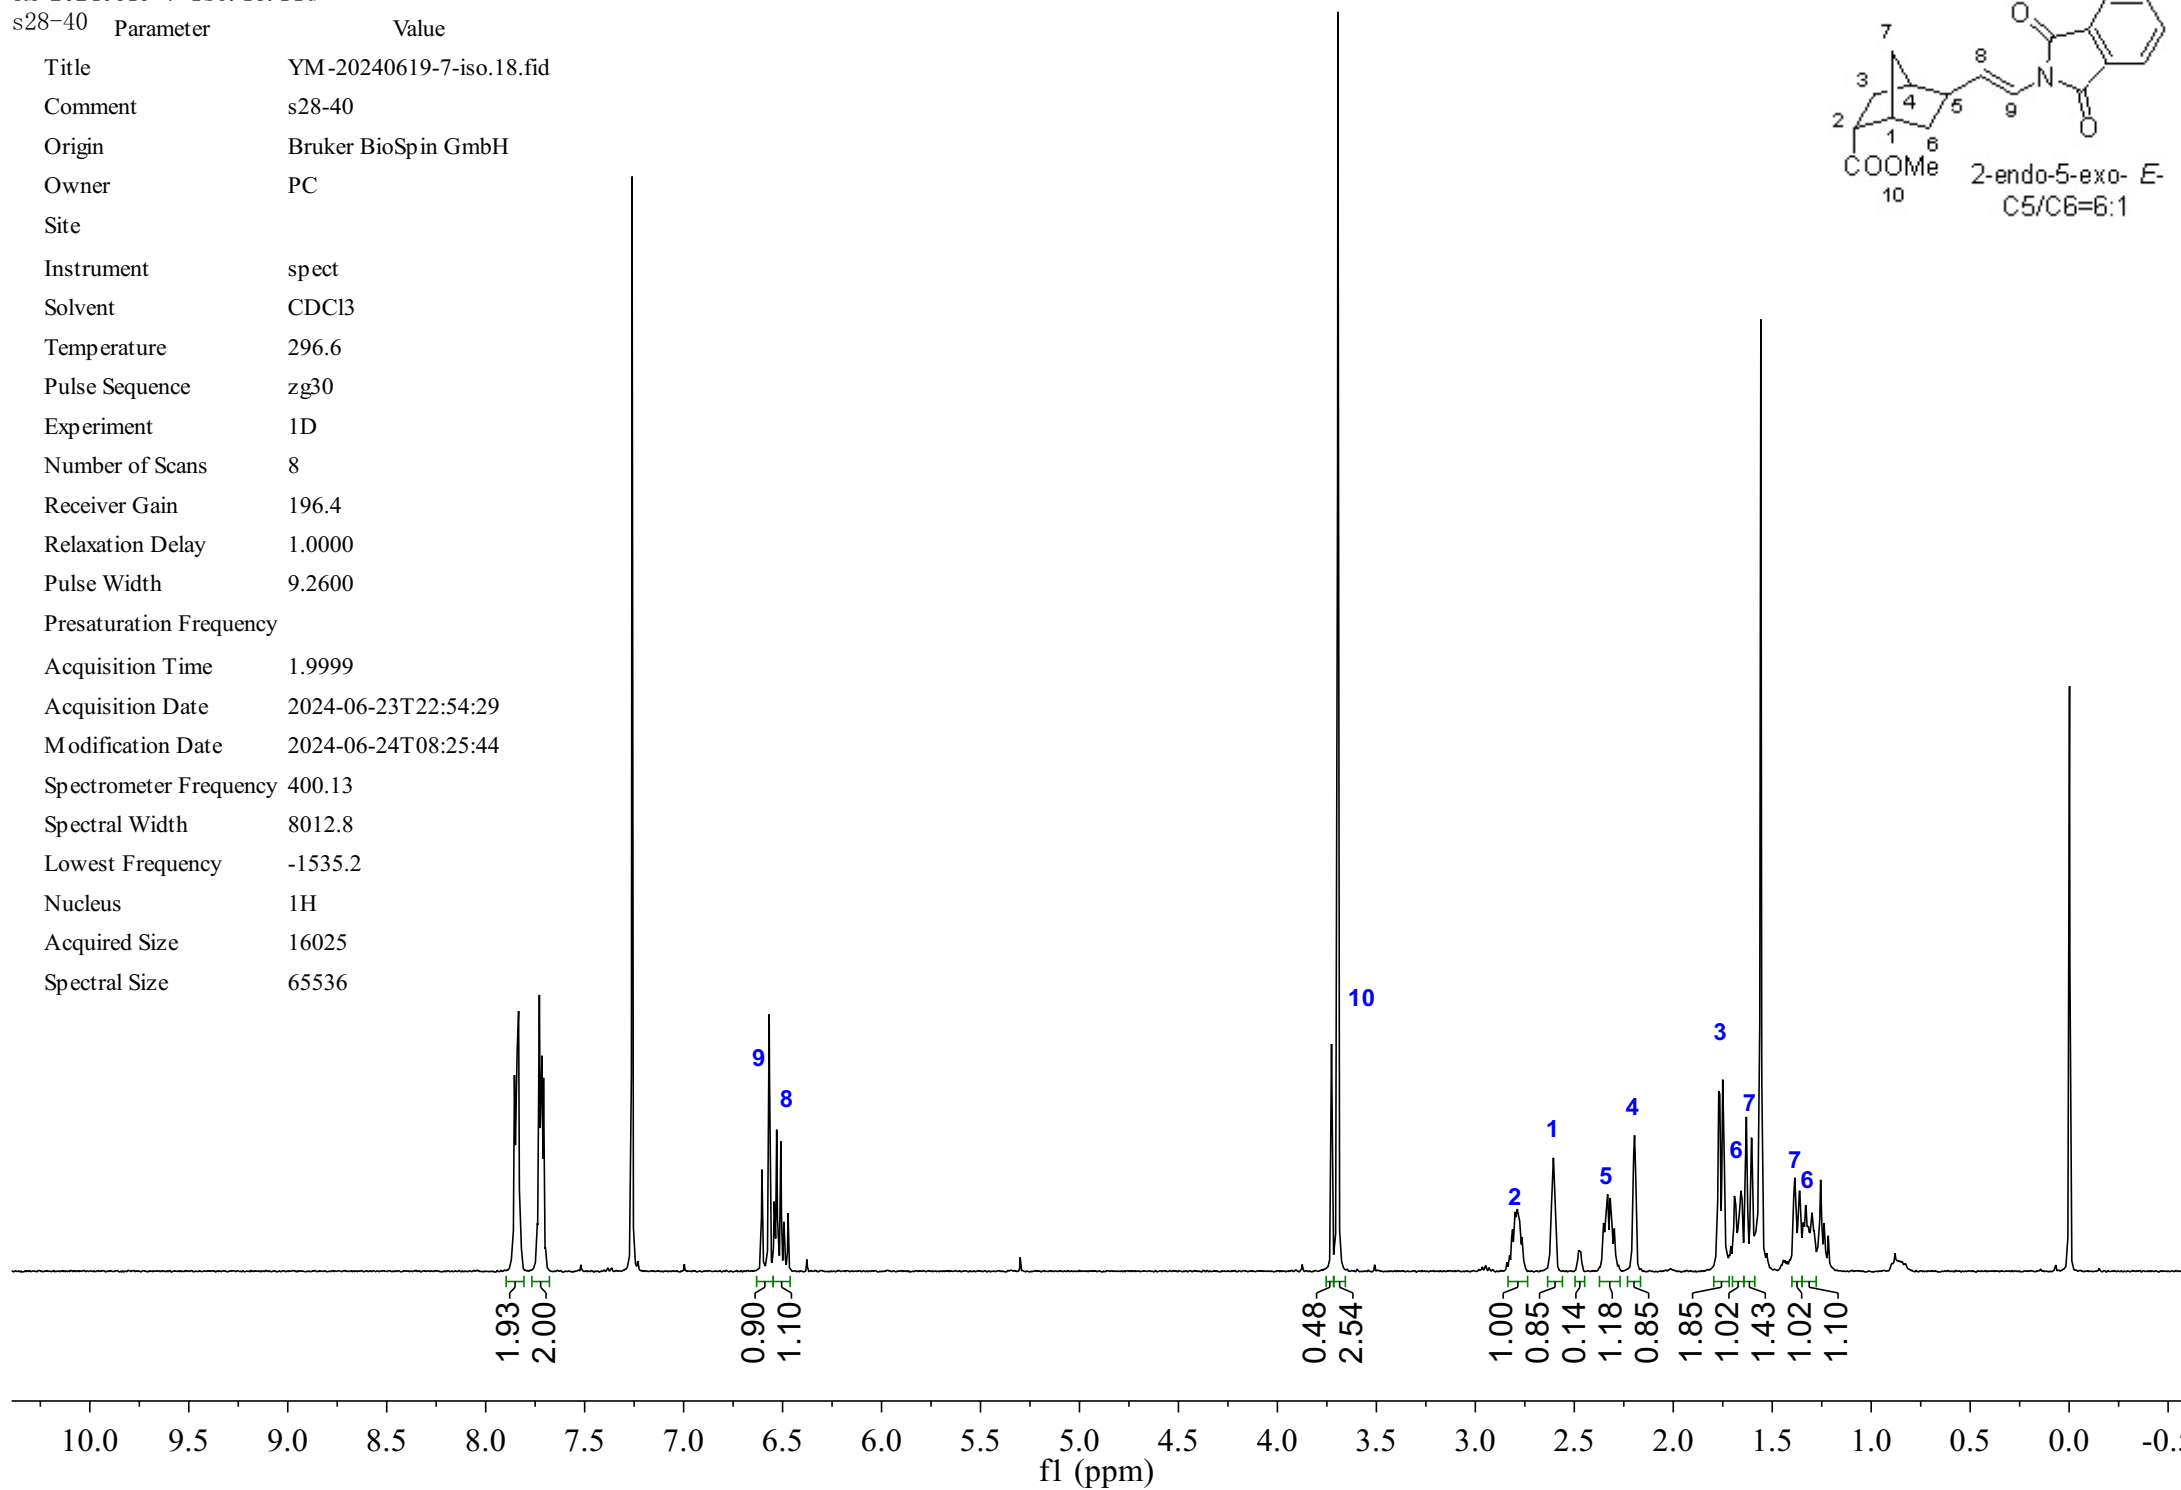

YM-20240619-7-iso.12.fid  
s28-40

— 175.4  
— 166.8

~ 134.4  
~ 131.9  
~ 127.2  
~ 123.6  
~ 116.5

51.7  
45.3  
43.5  
43.4  
40.9  
37.8  
33.5  
32.3

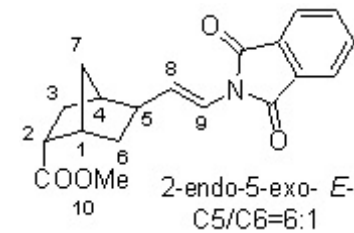

| Parameter               | Value                    |
|-------------------------|--------------------------|
| Title                   | YM-20240619-7-iso.12.fid |
| Comment                 | s28-40                   |
| Origin                  | Bruker BioSpin GmbH      |
| Owner                   | PC                       |
| Site                    |                          |
| Instrument              | spect                    |
| Solvent                 | CDC13                    |
| Temperature             | 297.1                    |
| Pulse Sequence          | zgpg30                   |
| Experiment              | 1D                       |
| Number of Scans         | 256                      |
| Receiver Gain           | 196.4                    |
| Relaxation Delay        | 2.0000                   |
| Pulse Width             | 10.2200                  |
| Presaturation Frequency |                          |
| Acquisition Time        | 1.3631                   |
| Acquisition Date        | 2024-06-23T00:36:22      |
| Modification Date       | 2024-06-23T12:52:25      |
| Spectrometer Frequency  | 100.62                   |
| Spectral Width          | 24038.5                  |
| Lowest Frequency        | -1943.8                  |
| Nucleus                 | 13C                      |
| Acquired Size           | 32768                    |
| Spectral Size           | 65536                    |

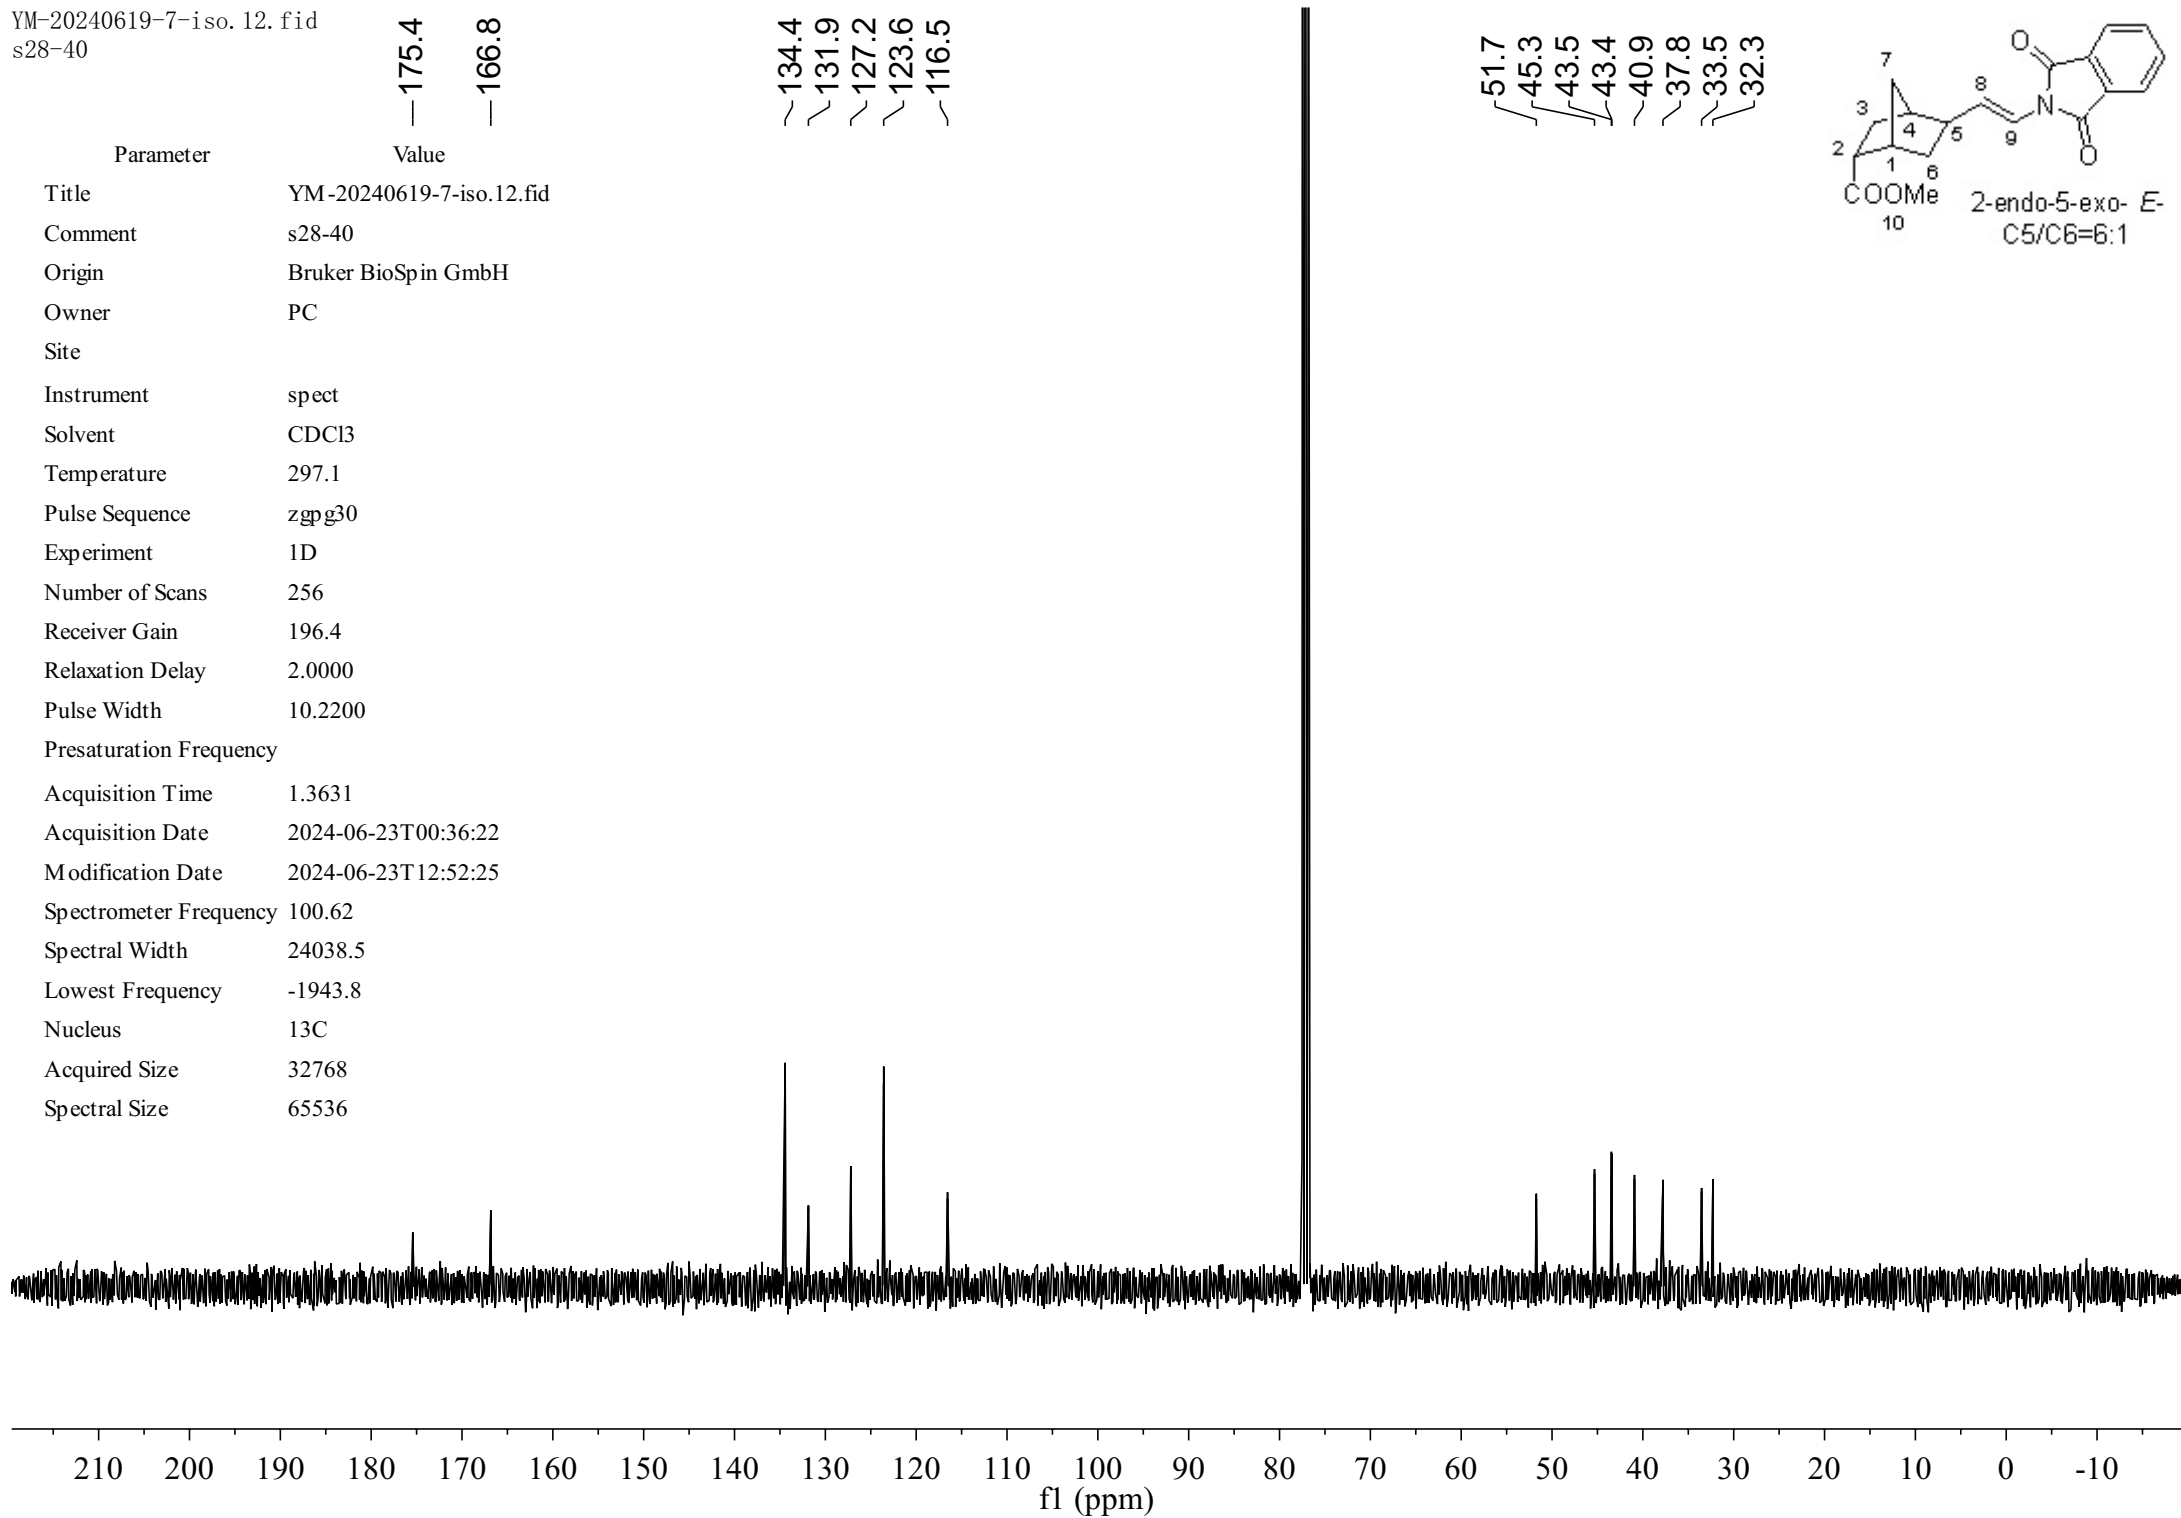

YM-20240619-7-iso.13.fid

| Parameter               | Value                    |
|-------------------------|--------------------------|
| Title                   | YM-20240619-7-iso.13.fid |
| Comment                 | s28-40                   |
| Origin                  | Bruker BioSpin GmbH      |
| Owner                   | PC                       |
| Site                    |                          |
| Instrument              | spect                    |
| Solvent                 | CDC13                    |
| Temperature             | 296.9                    |
| Pulse Sequence          | depts135                 |
| Experiment              | DEPT-135                 |
| Number of Scans         | 128                      |
| Receiver Gain           | 196.4                    |
| Relaxation Delay        | 2.0000                   |
| Pulse Width             | 10.2200                  |
| Presaturation Frequency |                          |
| Acquisition Time        | 1.3631                   |
| Acquisition Date        | 2024-06-23T00:51:27      |
| Modification Date       | 2024-06-23T12:52:26      |
| Spectrometer Frequency  | 100.62                   |
| Spectral Width          | 24038.5                  |
| Lowest Frequency        | -1958.0                  |
| Nucleus                 | <sup>13</sup> C          |
| Acquired Size           | 32768                    |
| Spectral Size           | 65536                    |

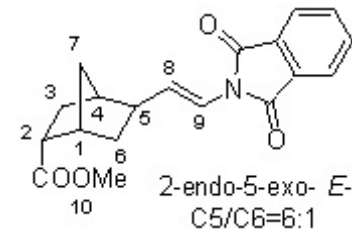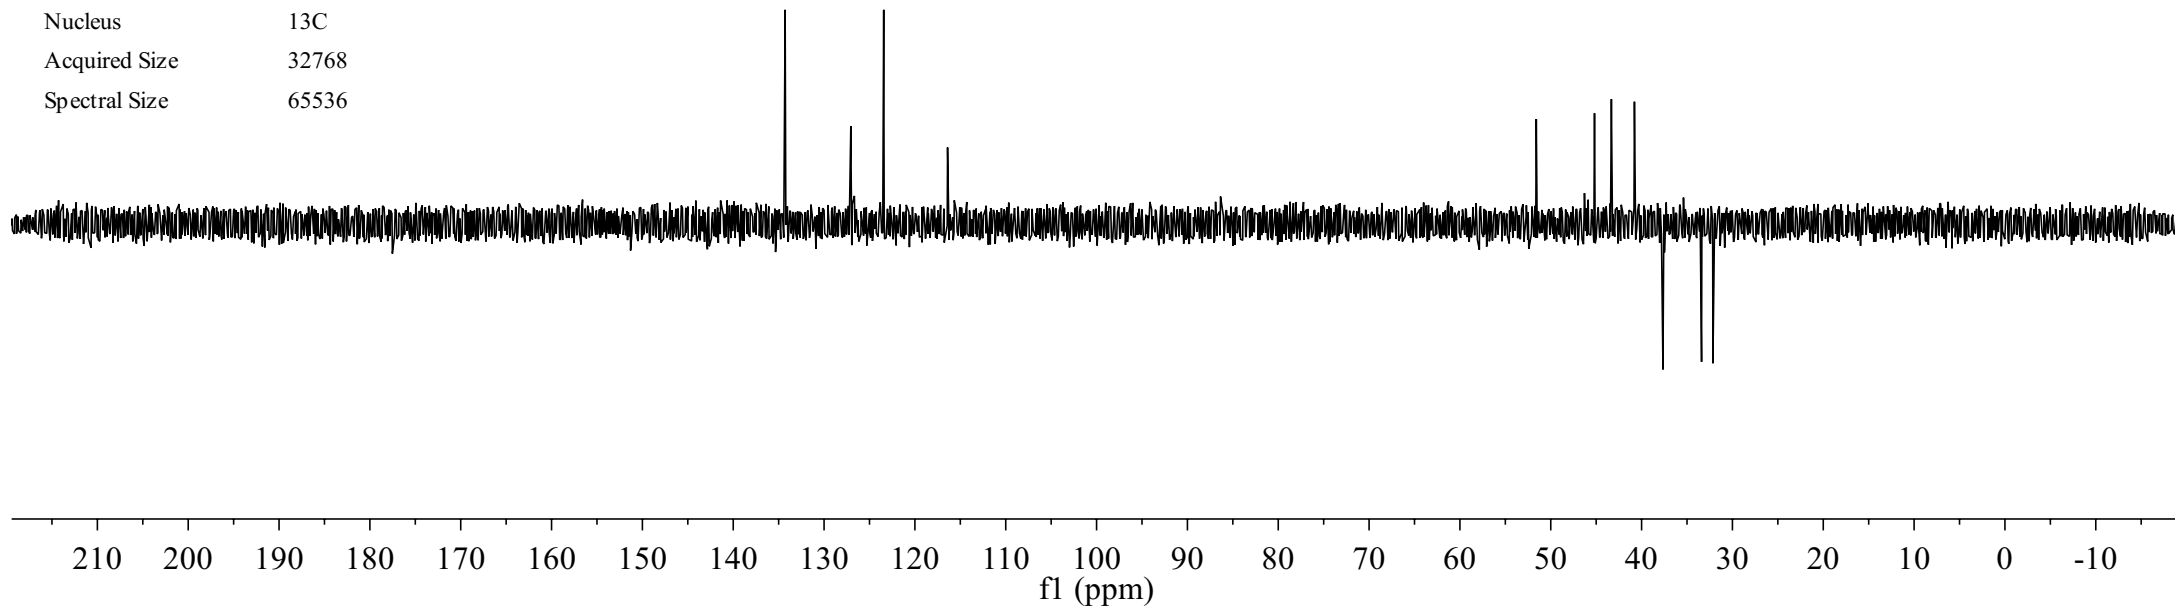

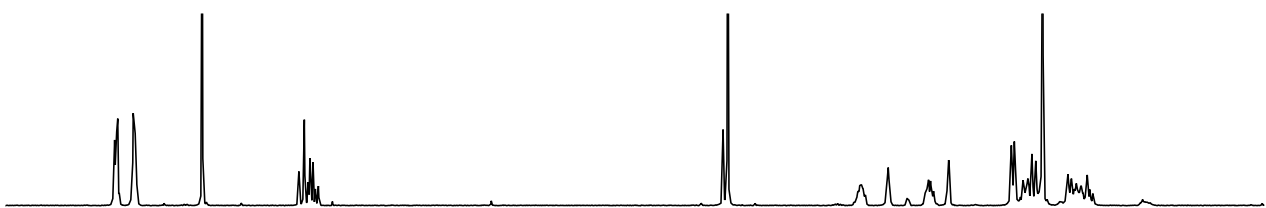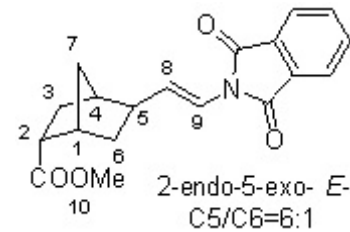

YM-20240619-7-iso.16.ser  
s28-40

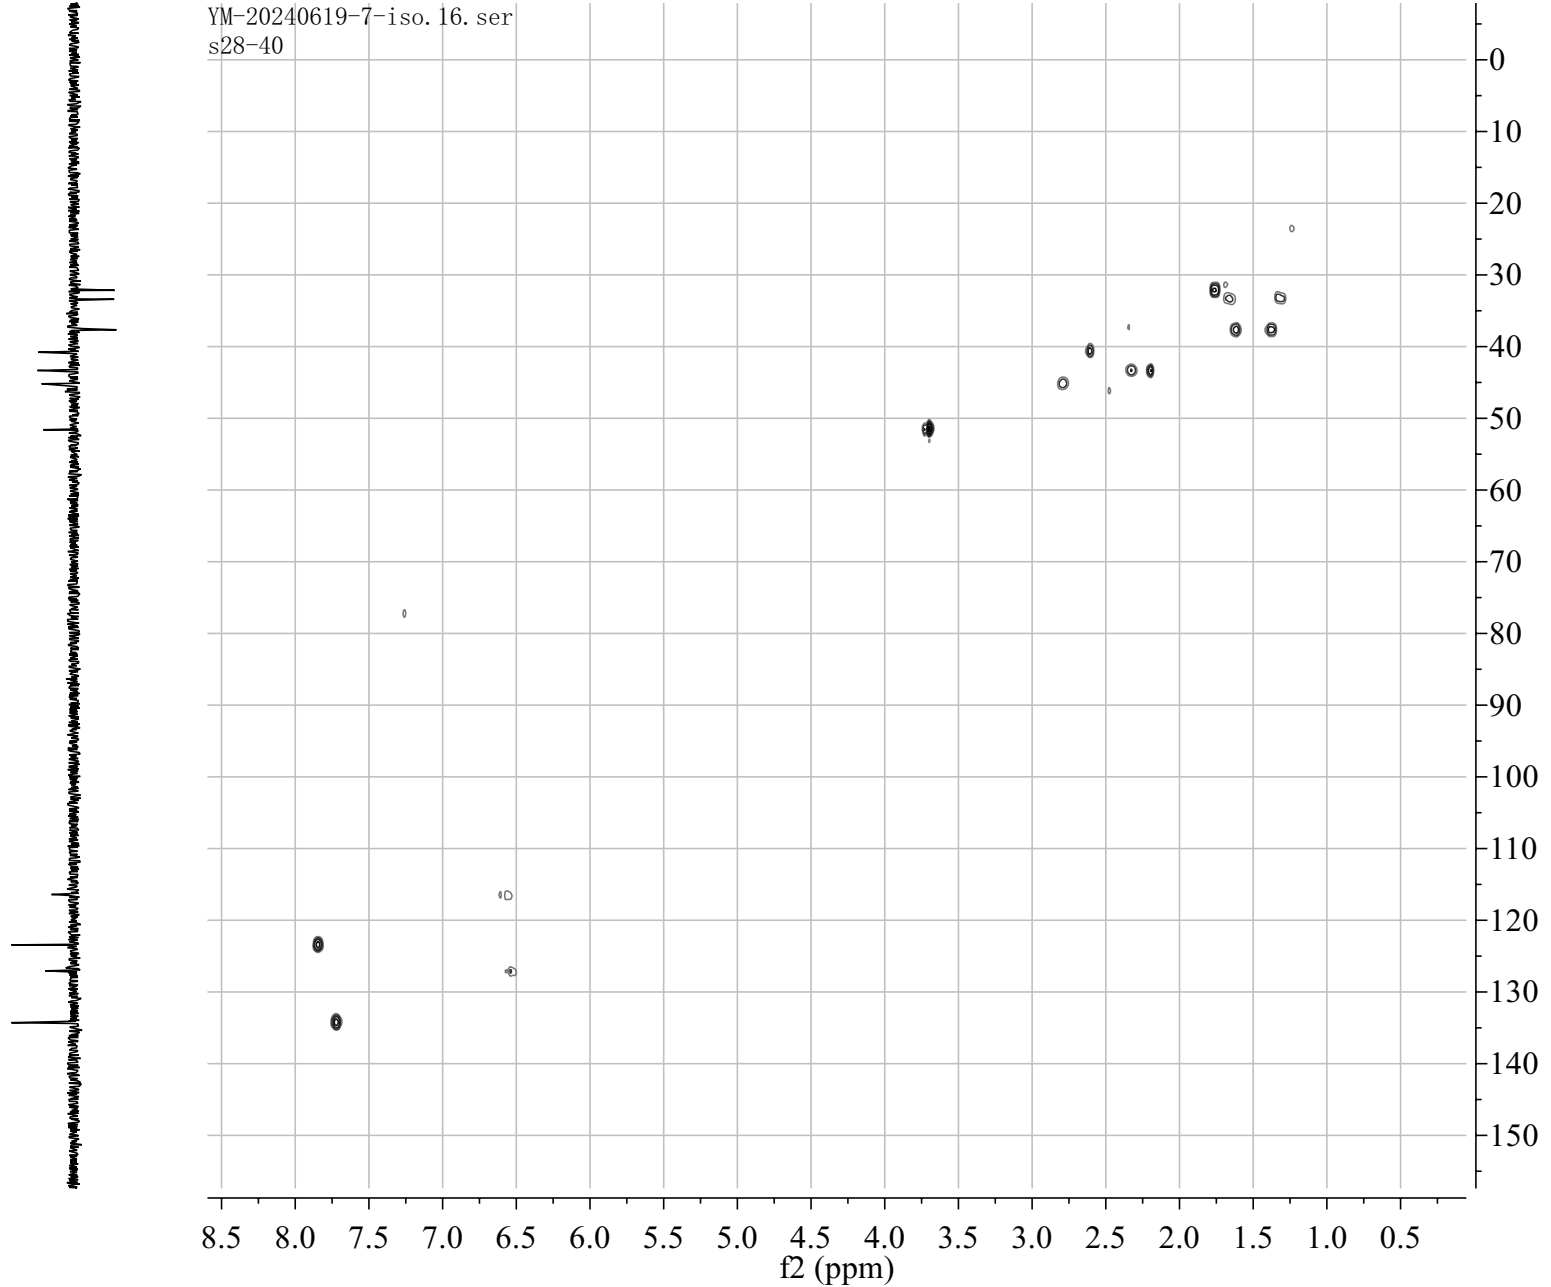

| Parameter               | Value                    |
|-------------------------|--------------------------|
| Title                   | YM-20240619-7-iso.16.ser |
| Comment                 | s28-40                   |
| Origin                  | Bruker BioSpin GmbH      |
| Owner                   | PC                       |
| Site                    |                          |
| Instrument              | spect                    |
| Solvent                 | CDCl3                    |
| Temperature             | 296.8                    |
| Pulse Sequence          | hsqcetgp                 |
| Experiment              | HSQC                     |
| Number of Scans         | 2                        |
| Receiver Gain           | 196.4                    |
| Relaxation Delay        | 1.4490                   |
| Pulse Width             | 9.2600                   |
| Presaturation Frequency |                          |
| Acquisition Time        | 0.1495                   |
| Acquisition Date        | 2024-06-23T01:06:54      |
| Modification Date       | 2024-06-23T12:52:27      |
| Spectrometer Frequency  | (400.13, 100.62)         |
| Spectral Width          | (3424.7, 16666.7)        |
| Lowest Frequency        | (14.8, -829.1)           |
| Nucleus                 | (1H, 13C)                |
| Acquired Size           | (512, 256)               |
| Spectral Size           | (512, 512)               |

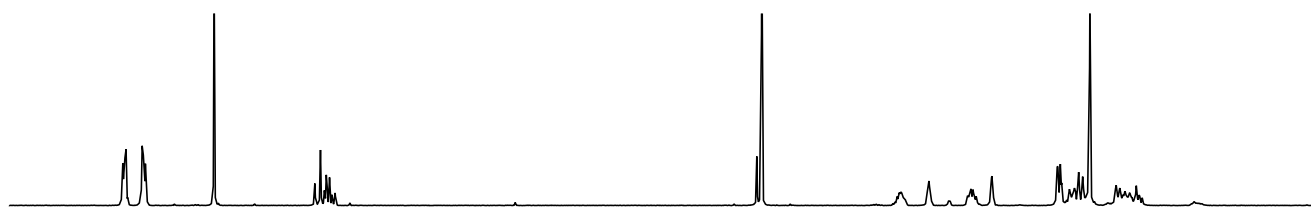

YM-20240619-7-iso. 15. ser  
s28-40

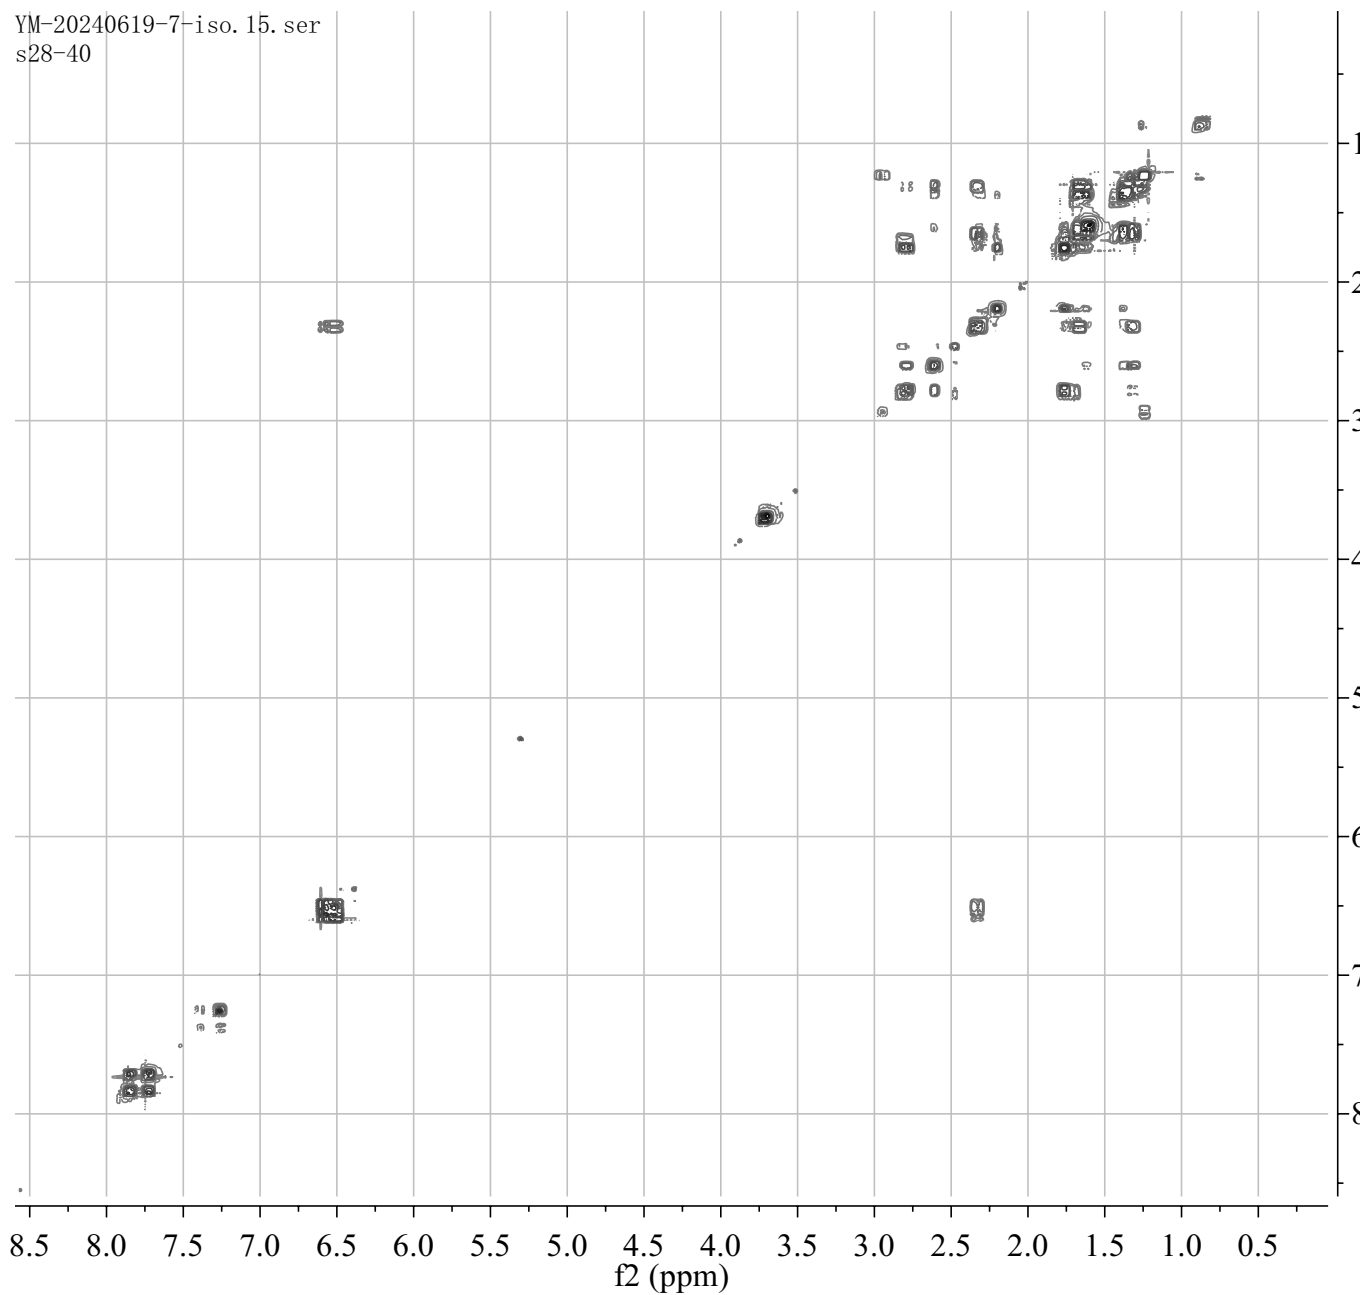

| Parameter               | Value                    |
|-------------------------|--------------------------|
| Title                   | YM-20240619-7-iso.15.ser |
| Comment                 | s28-40                   |
| Origin                  | Bruker BioSpin GmbH      |
| Owner                   | PC                       |
| Site                    |                          |
| Instrument              | spect                    |
| Solvent                 | CDCI3                    |
| Temperature             | 296.7                    |
| Pulse Sequence          | cosygpppqf               |
| Experiment              | COSY                     |
| Number of Scans         | 1                        |
| Receiver Gain           | 62.3                     |
| Relaxation Delay        | 1.8927                   |
| Pulse Width             | 9.2600                   |
| Presaturation Frequency |                          |
| Acquisition Time        | 0.2990                   |
| Acquisition Date        | 2024-06-23T01:00:48      |
| Modification Date       | 2024-06-23T12:52:26      |
| Spectrometer Frequency  | (400.13, 400.13)         |
| Spectral Width          | (3424.7, 3424.7)         |
| Lowest Frequency        | (14.8, 14.8)             |
| Nucleus                 | (1H, 1H)                 |
| Acquired Size           | (1024, 128)              |
| Spectral Size           | (1024, 1024)             |



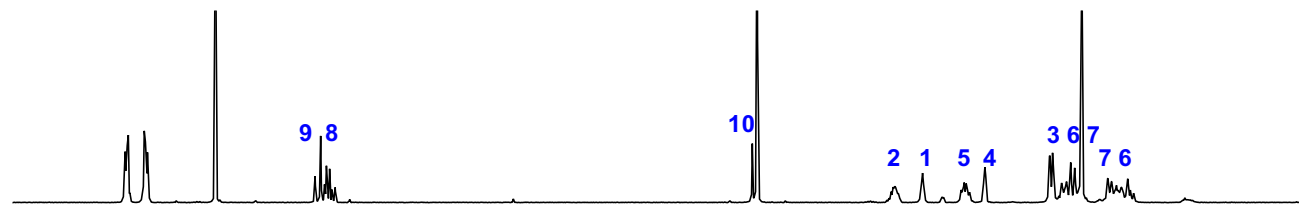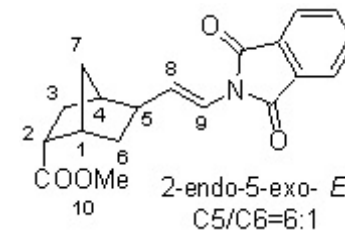

YM-20240619-7-iso.17.ser  
s28-40

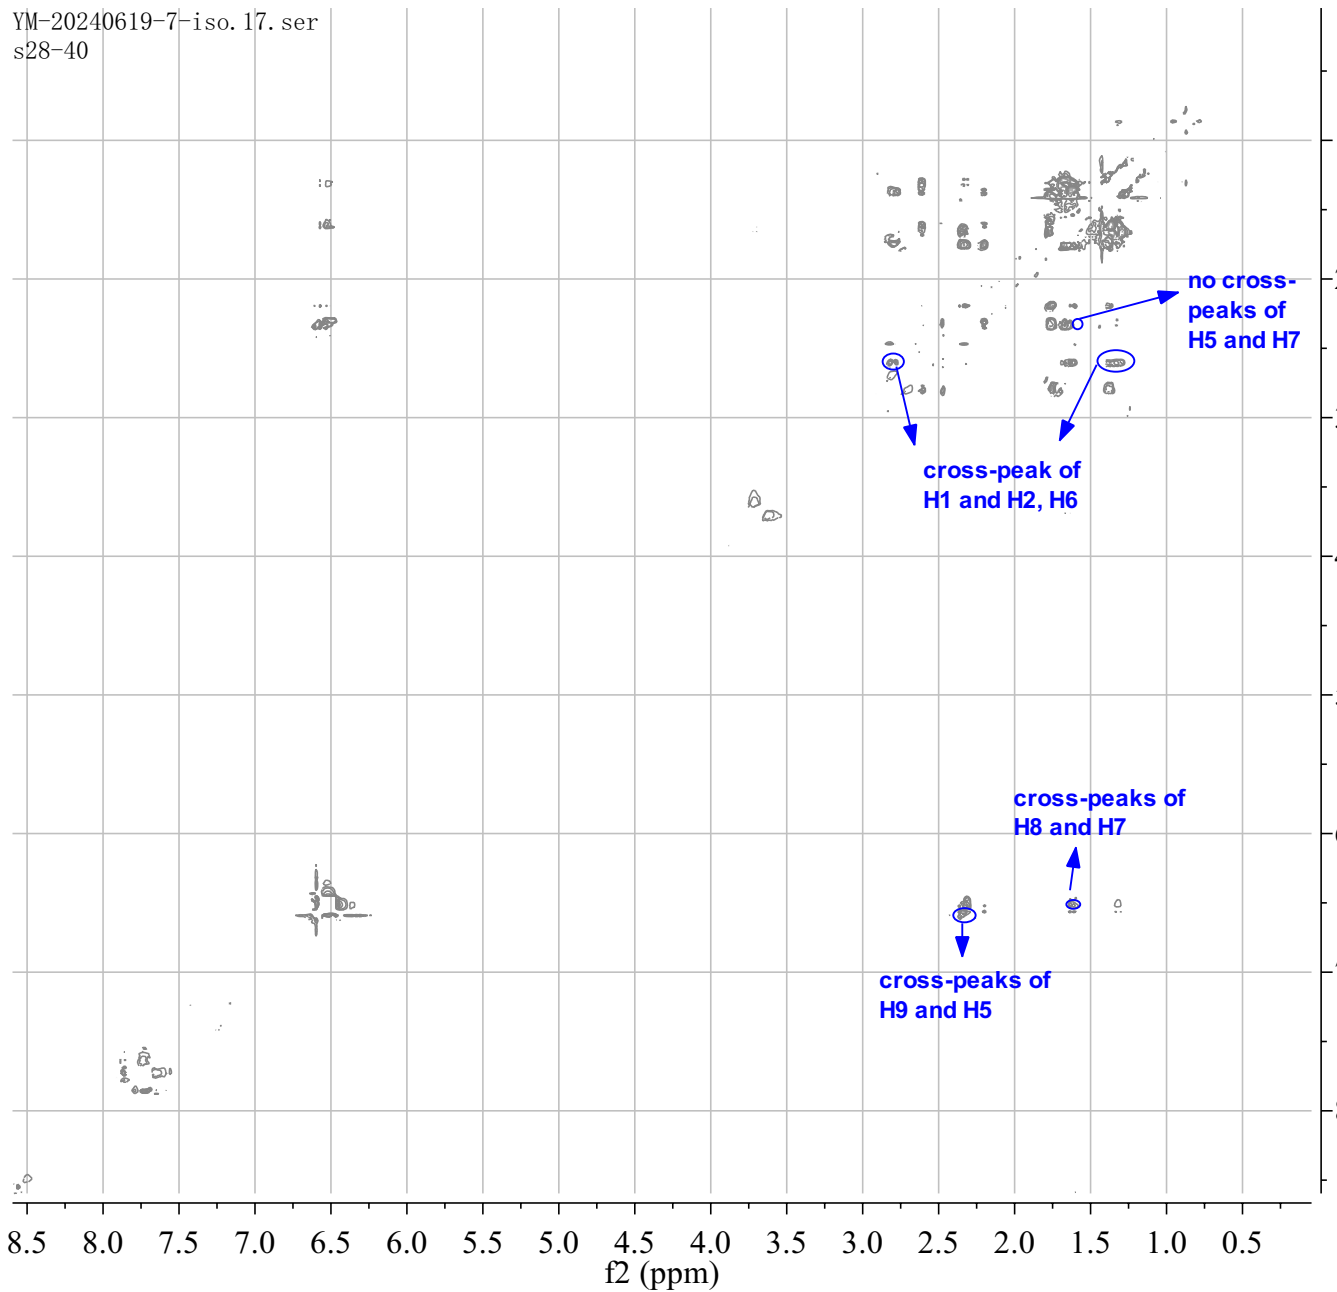

| Parameter               | Value                    |
|-------------------------|--------------------------|
| Title                   | YM-20240619-7-iso.17.ser |
| Comment                 | s28-40                   |
| Origin                  | Bruker BioSpin GmbH      |
| Owner                   | PC                       |
| Site                    |                          |
| Instrument              | spect                    |
| Solvent                 | CDC13                    |
| Temperature             | 296.6                    |
| Pulse Sequence          | noesygp.php              |
| Experiment              | NOESY                    |
| Number of Scans         | 4                        |
| Receiver Gain           | 62.3                     |
| Relaxation Delay        | 1.9570                   |
| Pulse Width             | 9.2600                   |
| Presaturation Frequency |                          |
| Acquisition Time        | 0.2990                   |
| Acquisition Date        | 2024-06-23T01:22:48      |
| Modification Date       | 2024-06-23T12:52:27      |
| Spectrometer Frequency  | (400.13, 400.13)         |
| Spectral Width          | (3424.7, 3424.7)         |
| Lowest Frequency        | (14.9, 14.9)             |
| Nucleus                 | (1H, 1H)                 |
| Acquired Size           | (1024, 256)              |
| Spectral Size           | (1024, 1024)             |

| Parameter               | Value                    |
|-------------------------|--------------------------|
| Title                   | YM-20240619-8-iso.27.fid |
| Comment                 | s47-50                   |
| Origin                  | Bruker BioSpin GmbH      |
| Owner                   | PC                       |
| Site                    |                          |
| Instrument              | spect                    |
| Solvent                 | CDC13                    |
| Temperature             | 296.6                    |
| Pulse Sequence          | zg30                     |
| Experiment              | 1D                       |
| Number of Scans         | 8                        |
| Receiver Gain           | 111.4                    |
| Relaxation Delay        | 1.0000                   |
| Pulse Width             | 9.2600                   |
| Presaturation Frequency |                          |
| Acquisition Time        | 1.9999                   |
| Acquisition Date        | 2024-06-23T23:01:28      |
| Modification Date       | 2024-06-24T08:26:00      |
| Spectrometer Frequency  | 400.13                   |
| Spectral Width          | 8012.8                   |
| Lowest Frequency        | -1535.2                  |
| Nucleus                 | 1H                       |
| Acquired Size           | 16025                    |
| Spectral Size           | 65536                    |

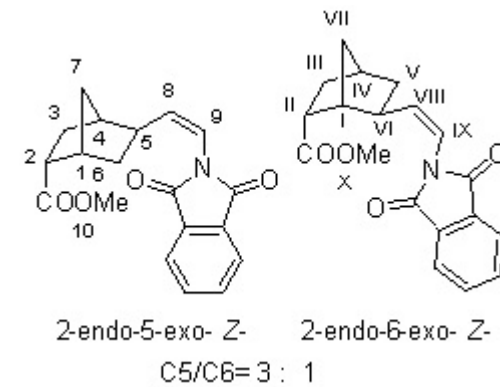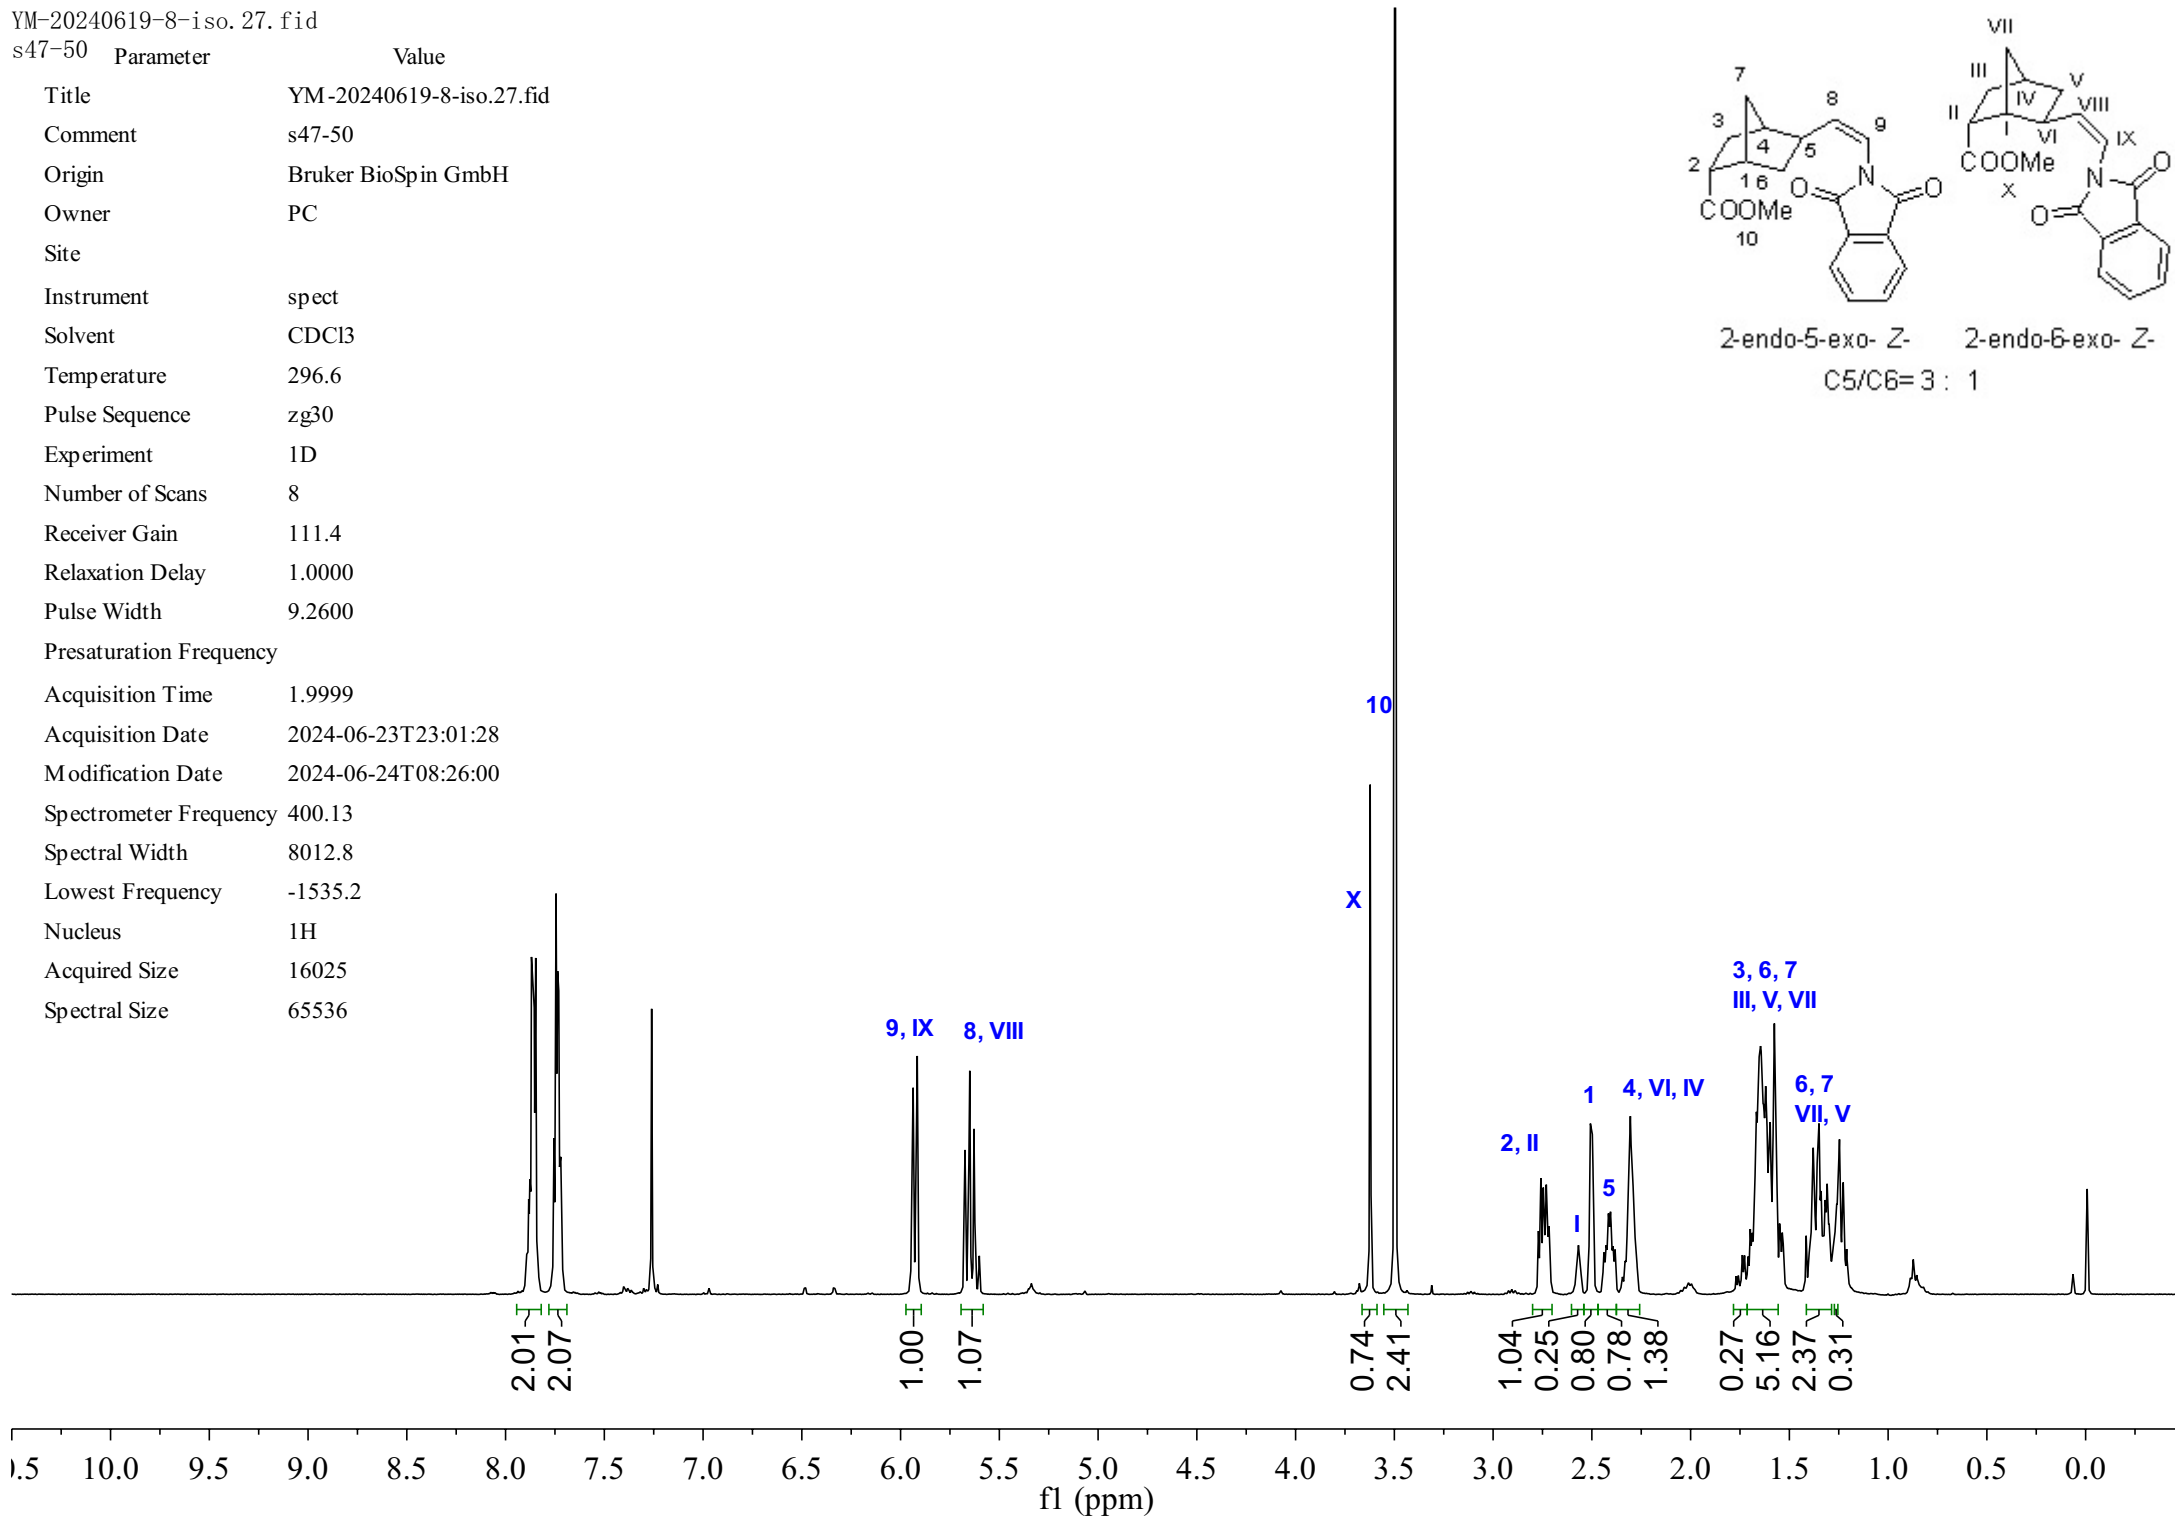

175.3  
175.0  
167.3  
167.0

138.5  
138.0  
134.3  
134.3  
132.2  
123.8  
123.6  
114.8  
114.3

51.7  
51.5  
46.4  
46.0  
45.3  
43.3  
40.7  
40.3  
38.0  
37.9  
37.8  
37.4  
35.1  
33.4  
32.2  
31.4

| Parameter               | Value                    |
|-------------------------|--------------------------|
| Title                   | YM-20240619-8-iso.21.fid |
| Comment                 |                          |
| Origin                  | Bruker BioSpin GmbH      |
| Owner                   | PC                       |
| Site                    |                          |
| Instrument              | spect                    |
| Solvent                 | CDC13                    |
| Temperature             | 297.4                    |
| Pulse Sequence          | zpgg30                   |
| Experiment              | 1D                       |
| Number of Scans         | 256                      |
| Receiver Gain           | 196.4                    |
| Relaxation Delay        | 2.0000                   |
| Pulse Width             | 10.2200                  |
| Presaturation Frequency |                          |
| Acquisition Time        | 1.3631                   |
| Acquisition Date        | 2024-06-23T02:24:49      |
| Modification Date       | 2024-06-23T12:52:16      |
| Spectrometer Frequency  | 100.62                   |
| Spectral Width          | 24038.5                  |
| Lowest Frequency        | -1945.0                  |
| Nucleus                 | 13C                      |
| Acquired Size           | 32768                    |
| Spectral Size           | 65536                    |

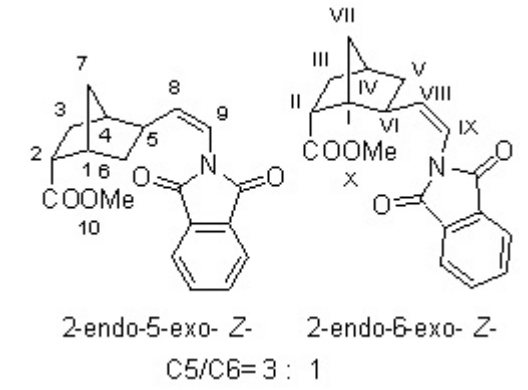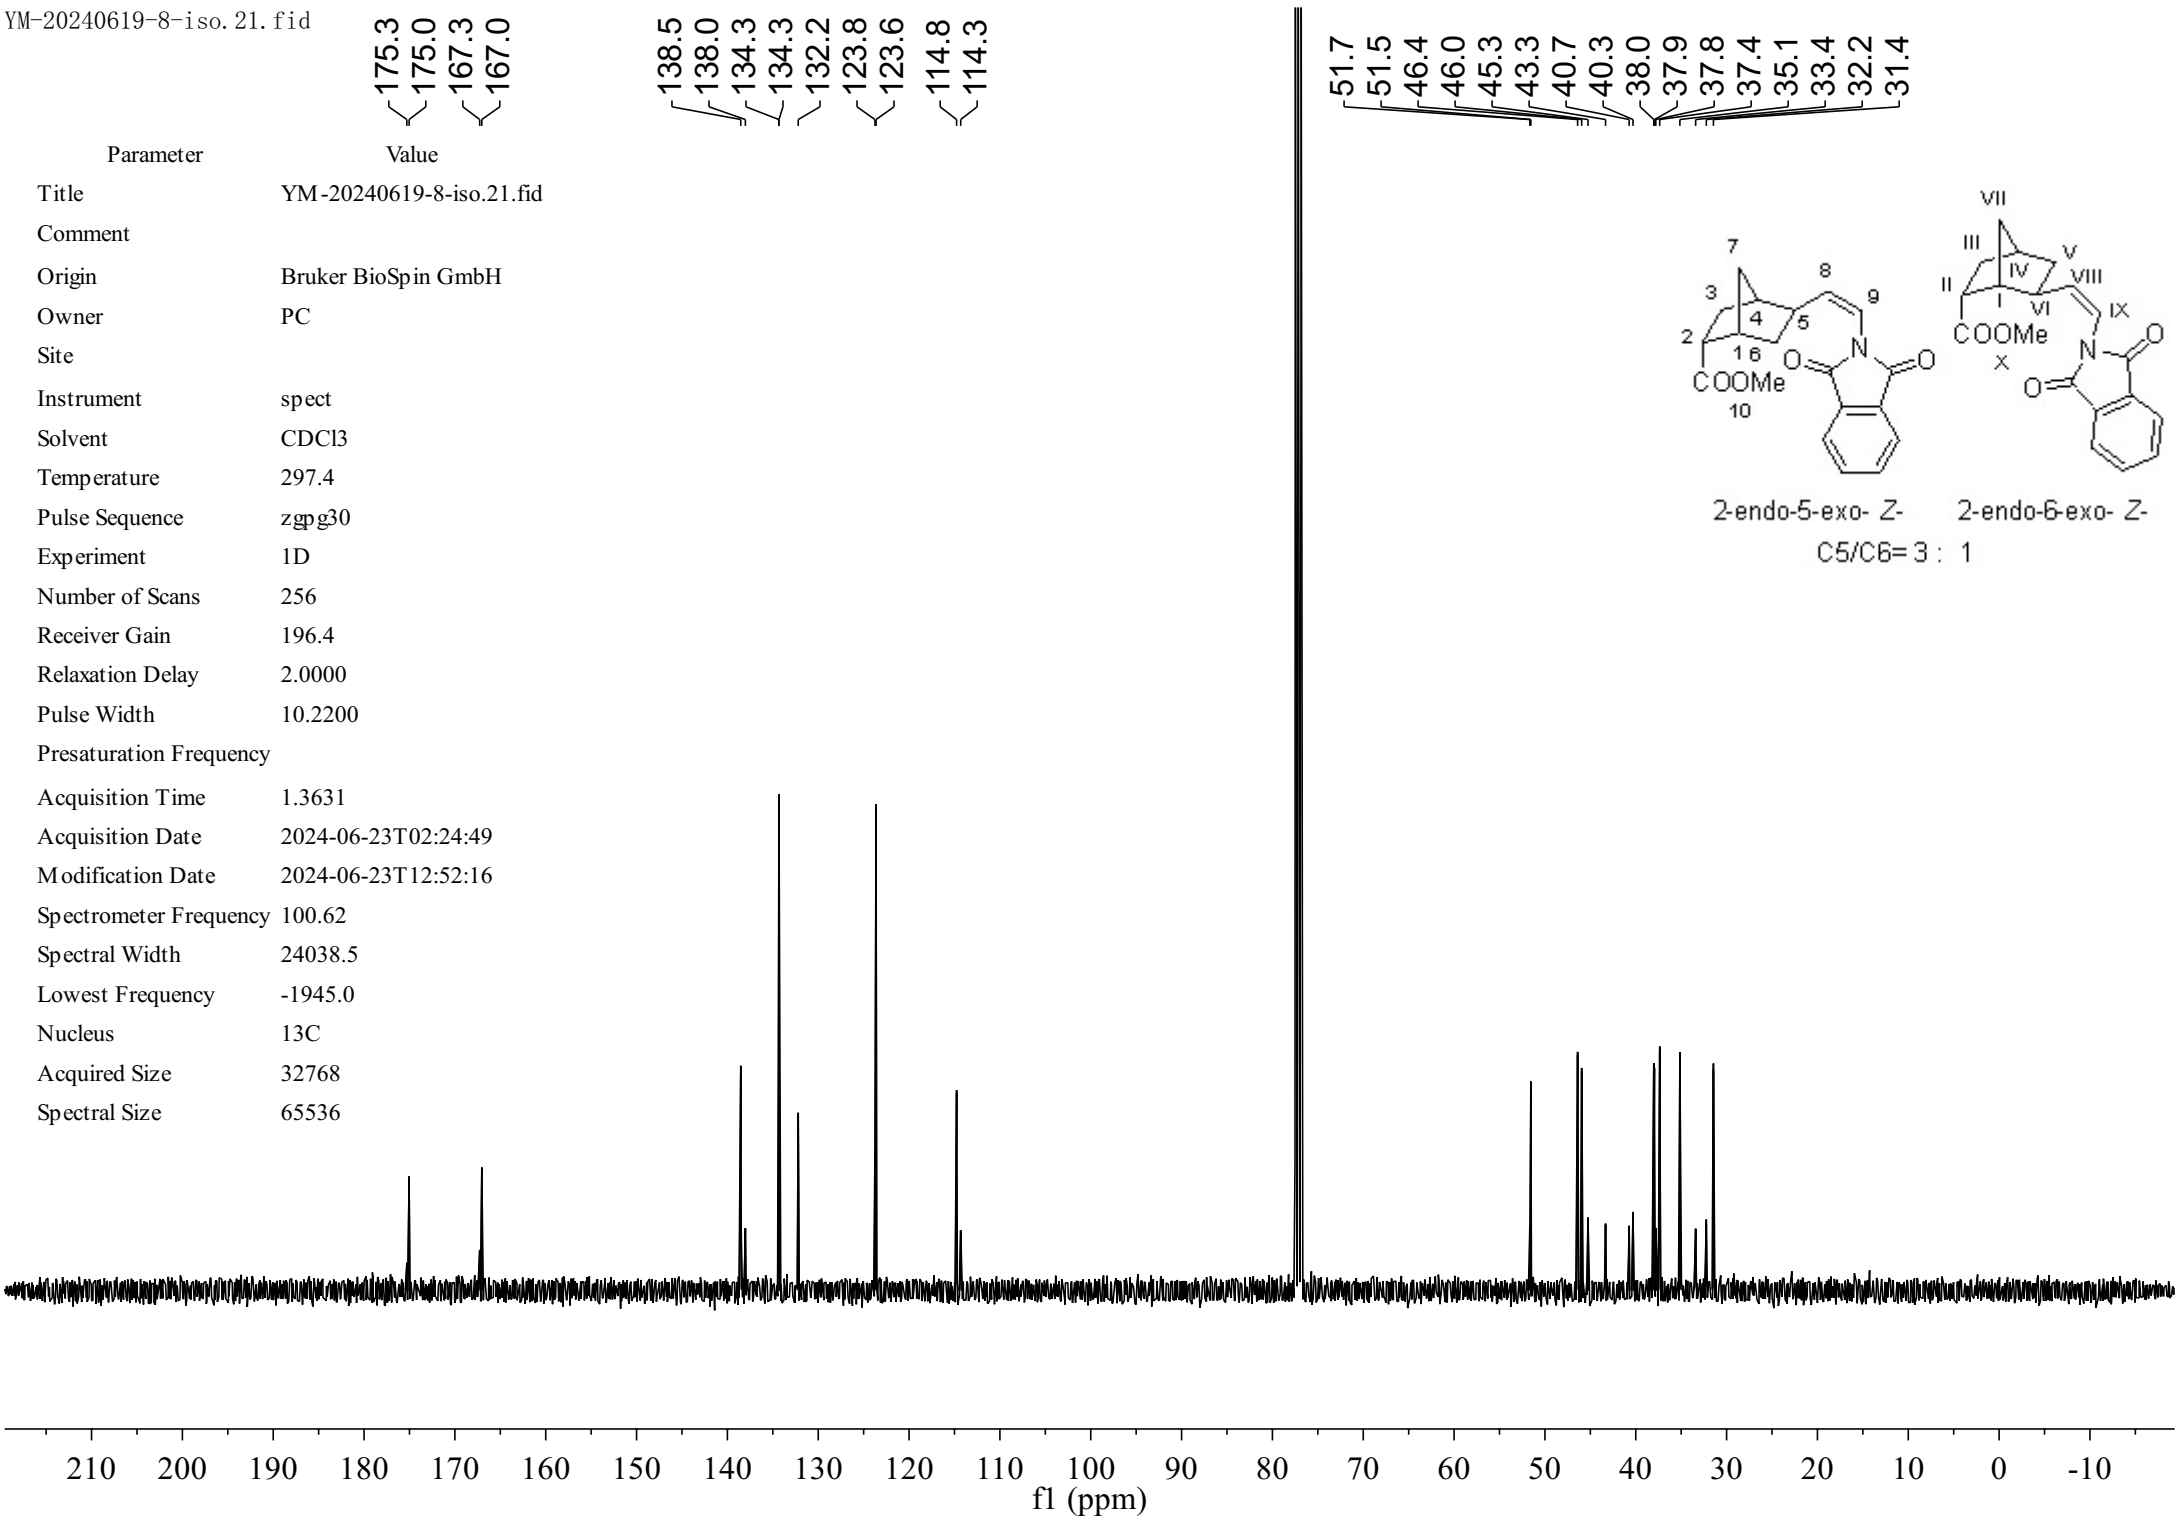

| Parameter               | Value                    |
|-------------------------|--------------------------|
| Title                   | YM-20240619-8-iso.26.fid |
| Comment                 | s47-50                   |
| Origin                  | Bruker BioSpin GmbH      |
| Owner                   | PC                       |
| Site                    |                          |
| Instrument              | spect                    |
| Solvent                 | CDC13                    |
| Temperature             | 296.7                    |
| Pulse Sequence          | deptsq 135               |
| Experiment              | DEPT-135                 |
| Number of Scans         | 64                       |
| Receiver Gain           | 196.4                    |
| Relaxation Delay        | 2.0000                   |
| Pulse Width             | 10.2200                  |
| Presaturation Frequency |                          |
| Acquisition Time        | 1.3631                   |
| Acquisition Date        | 2024-06-23T12:13:38      |
| Modification Date       | 2024-06-23T12:52:18      |
| Spectrometer Frequency  | 100.62                   |
| Spectral Width          | 24038.5                  |
| Lowest Frequency        | -1958.0                  |
| Nucleus                 | <sup>13</sup> C          |
| Acquired Size           | 32768                    |
| Spectral Size           | 65536                    |

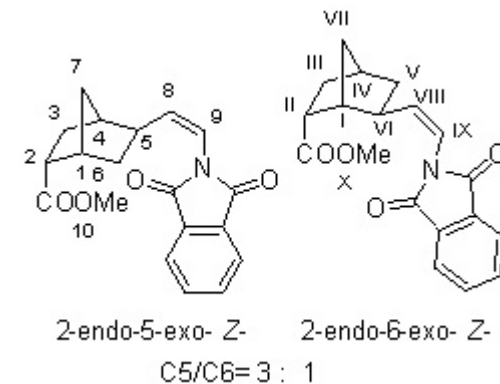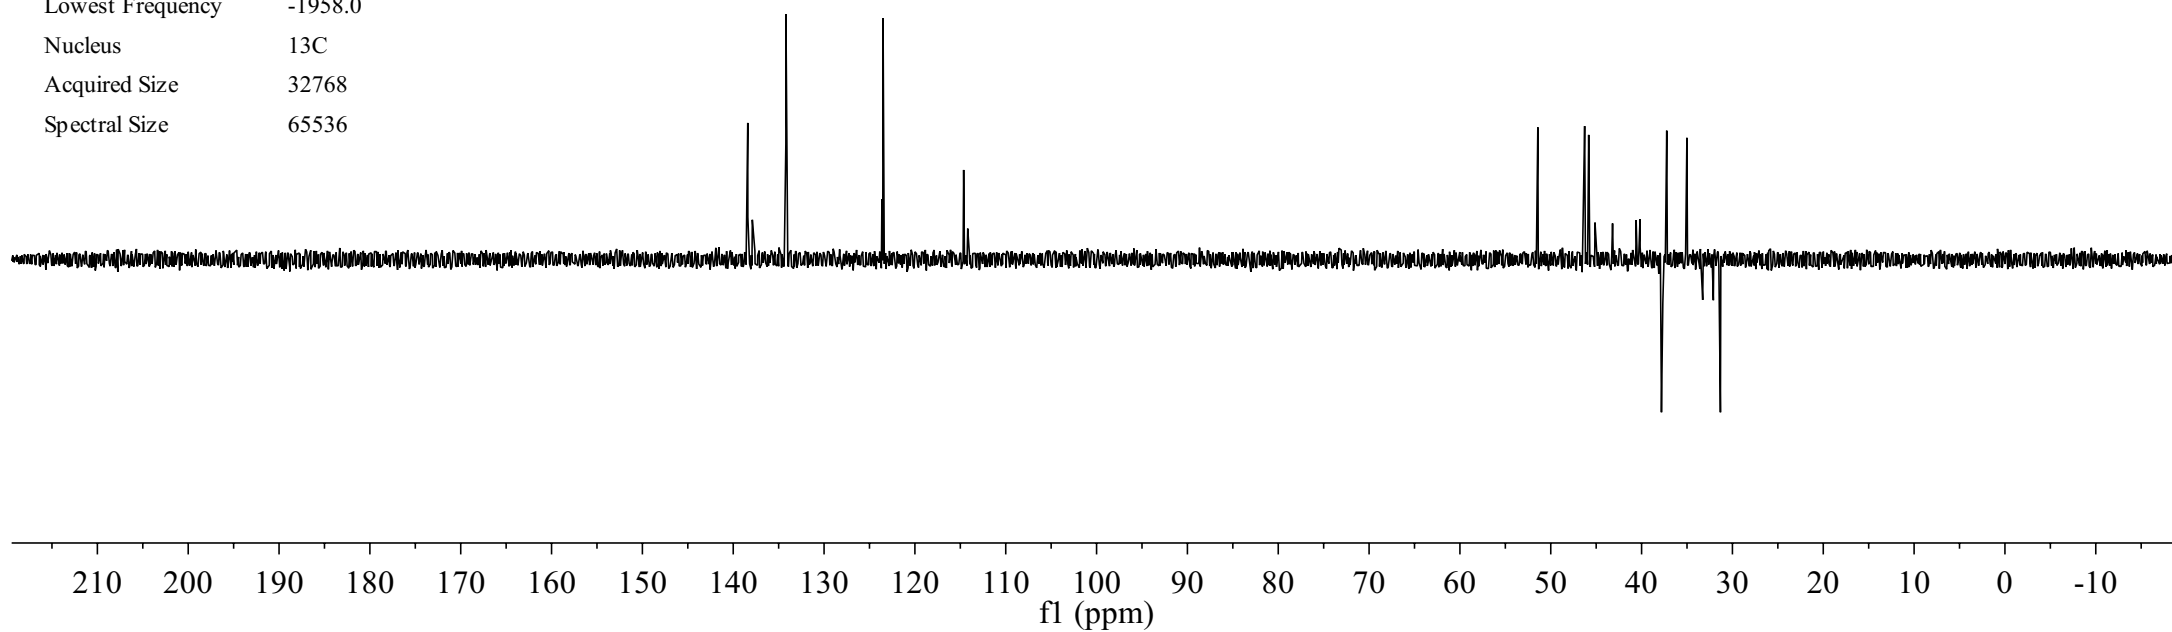

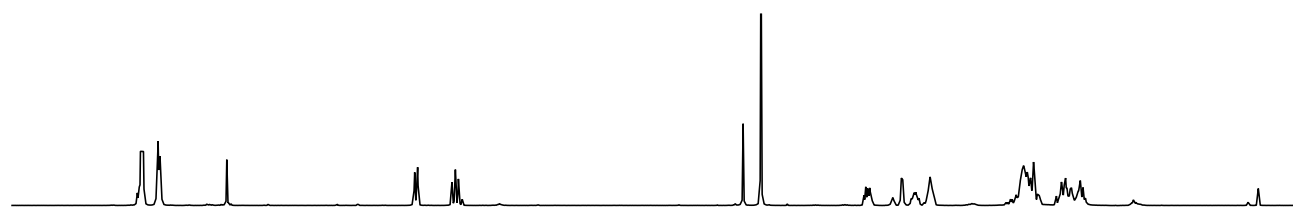

YM-20240619-8-iso.24.ser

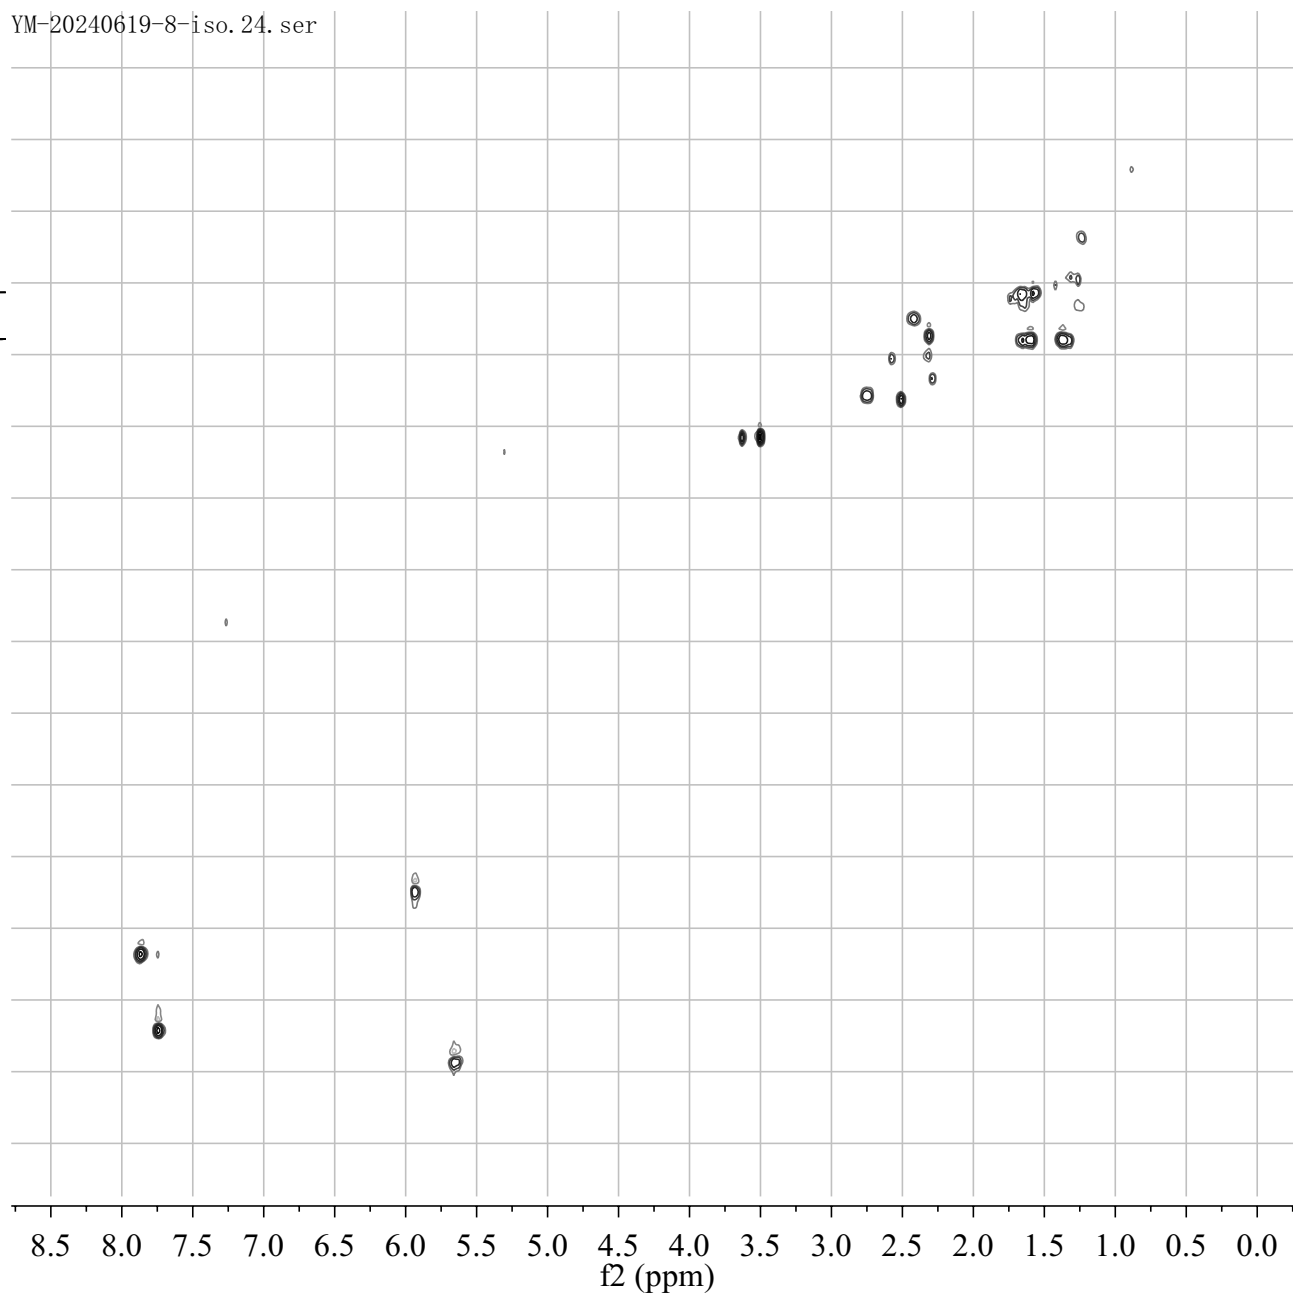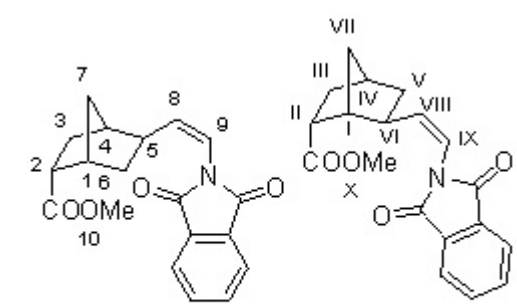

2-endo-5-exo-Z- 2-endo-6-exo-Z-  
C5/C6= 3 : 1

| Parameter               | Value                    |
|-------------------------|--------------------------|
| Title                   | YM-20240619-8-iso.24.ser |
| Comment                 |                          |
| Origin                  | Bruker BioSpin GmbH      |
| Owner                   | PC                       |
| Site                    |                          |
| Instrument              | spect                    |
| Solvent                 | CDC13                    |
| Temperature             | 297.2                    |
| Pulse Sequence          | hsqcetgp                 |
| Experiment              | HSQC                     |
| Number of Scans         | 2                        |
| Receiver Gain           | 196.4                    |
| Relaxation Delay        | 1.4582                   |
| Pulse Width             | 9.2600                   |
| Presaturation Frequency |                          |
| Acquisition Time        | 0.1403                   |
| Acquisition Date        | 2024-06-23T02:33:06      |
| Modification Date       | 2024-06-23T12:52:17      |
| Spectrometer Frequency  | (400.13, 100.62)         |
| Spectral Width          | (3649.6, 16666.7)        |
| Lowest Frequency        | (-136.9, -829.1)         |
| Nucleus                 | (1H, 13C)                |
| Acquired Size           | (512, 256)               |
| Spectral Size           | (512, 512)               |

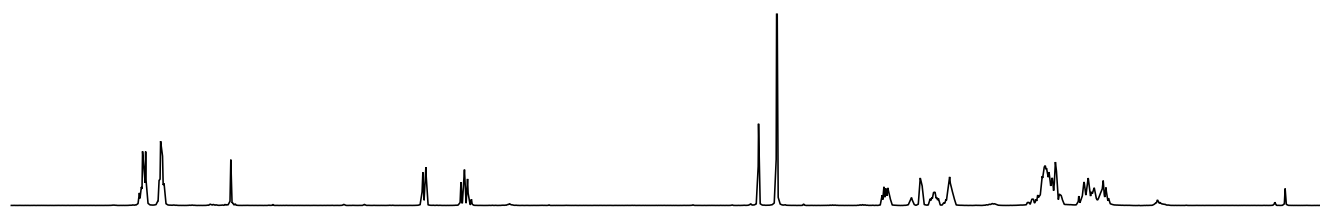

YM-20240619-8-iso. 23. ser

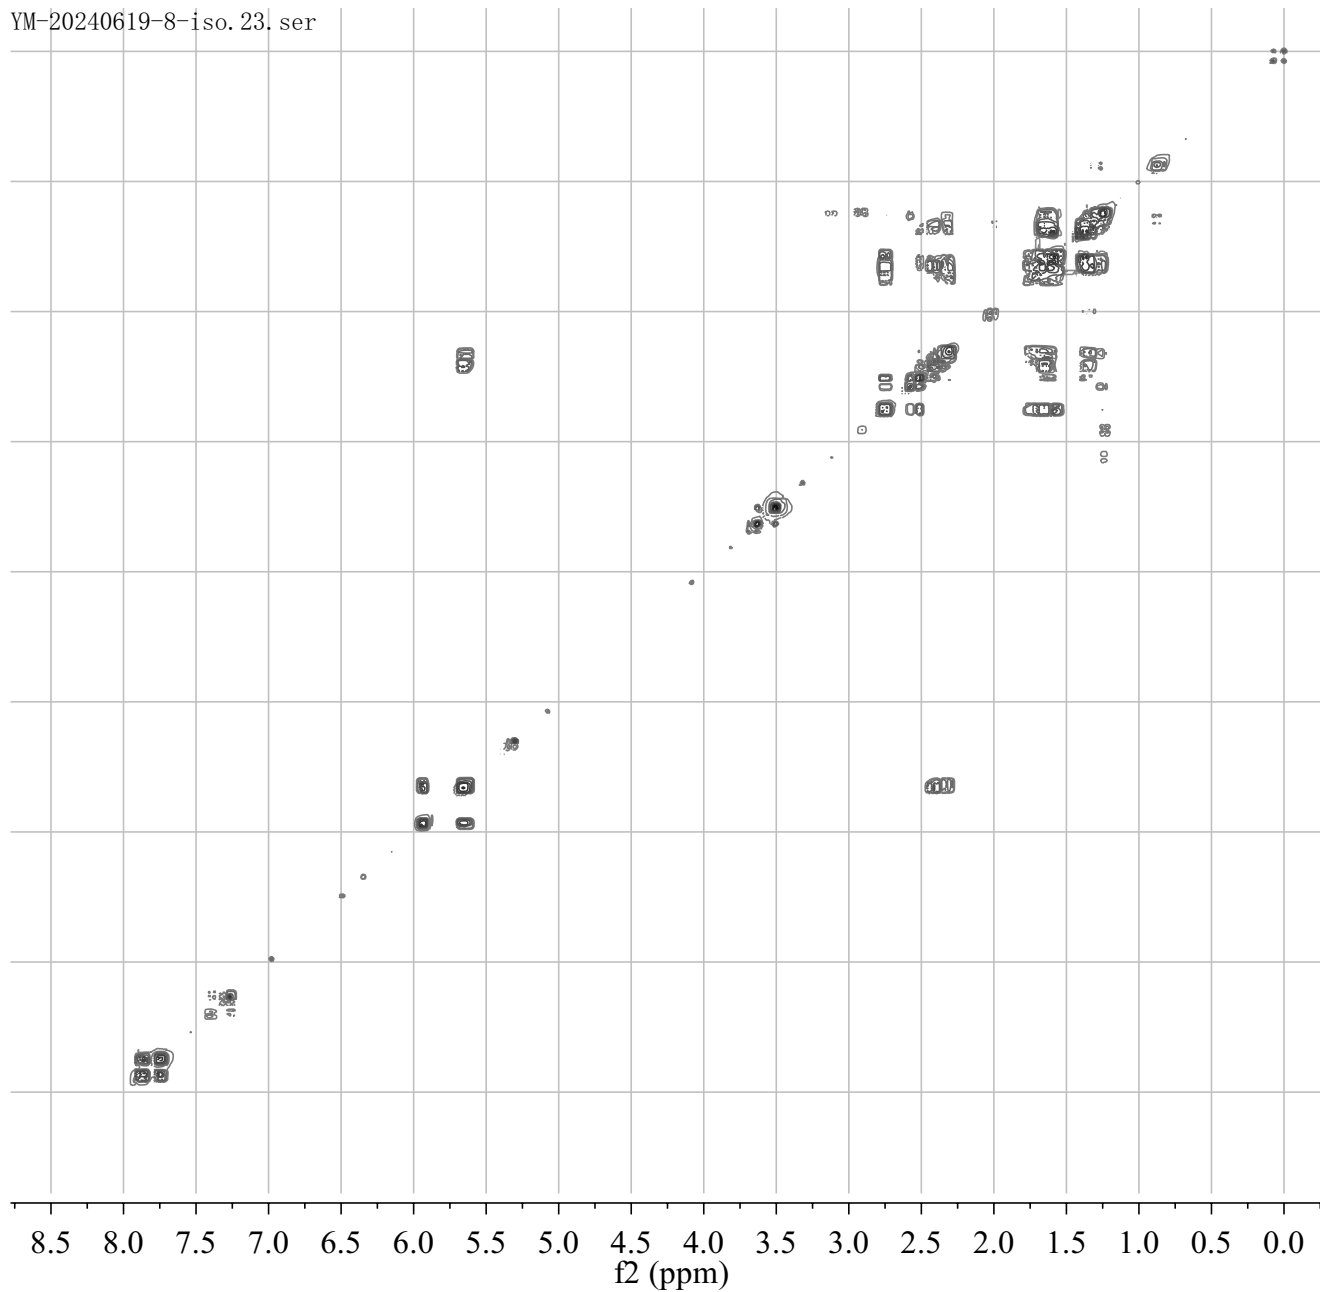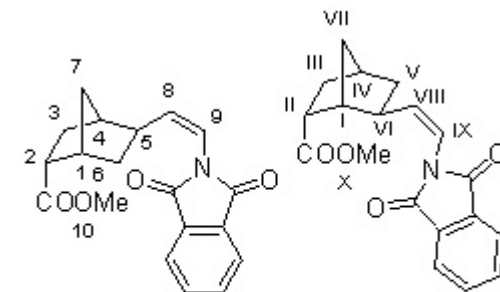

2-endo-5-exo- Z-    2-endo-6-exo- Z-  
C5/C6= 3 : 1

| Parameter               | Value                    |
|-------------------------|--------------------------|
| Title                   | YM-20240619-8-iso.23.ser |
| Comment                 |                          |
| Origin                  | Bruker BioSpin GmbH      |
| Owner                   | PC                       |
| Site                    |                          |
| Instrument              | spect                    |
| Solvent                 | CDCI3                    |
| Temperature             | 297.0                    |
| Pulse Sequence          | cosygpppqf               |
| Experiment              | COSY                     |
| Number of Scans         | 1                        |
| Receiver Gain           | 31.7                     |
| Relaxation Delay        | 1.9111                   |
| Pulse Width             | 9.2600                   |
| Presaturation Frequency |                          |
| Acquisition Time        | 0.2806                   |
| Acquisition Date        | 2024-06-23T02:27:00      |
| Modification Date       | 2024-06-23T12:52:17      |
| Spectrometer Frequency  | (400.13, 400.13)         |
| Spectral Width          | (3649.6, 3649.6)         |
| Lowest Frequency        | (-136.9, -136.9)         |
| Nucleus                 | (1H, 1H)                 |
| Acquired Size           | (1024, 128)              |
| Spectral Size           | (1024, 1024)             |

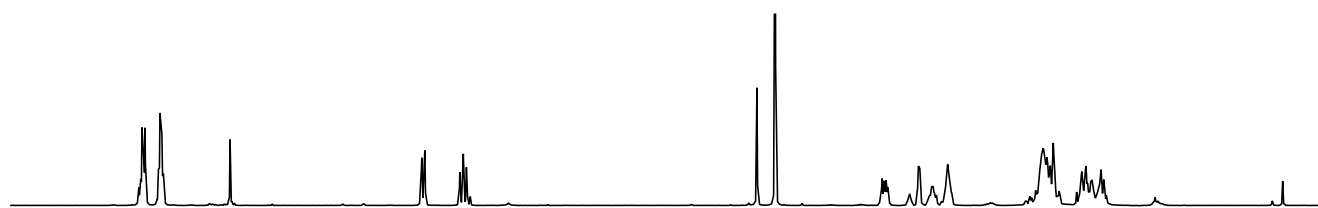

YM-20240619-8-iso. 25. ser



2-endo-5-exo- Z-    2-endo-6-exo- Z-  
C5/C6= 3 : 1

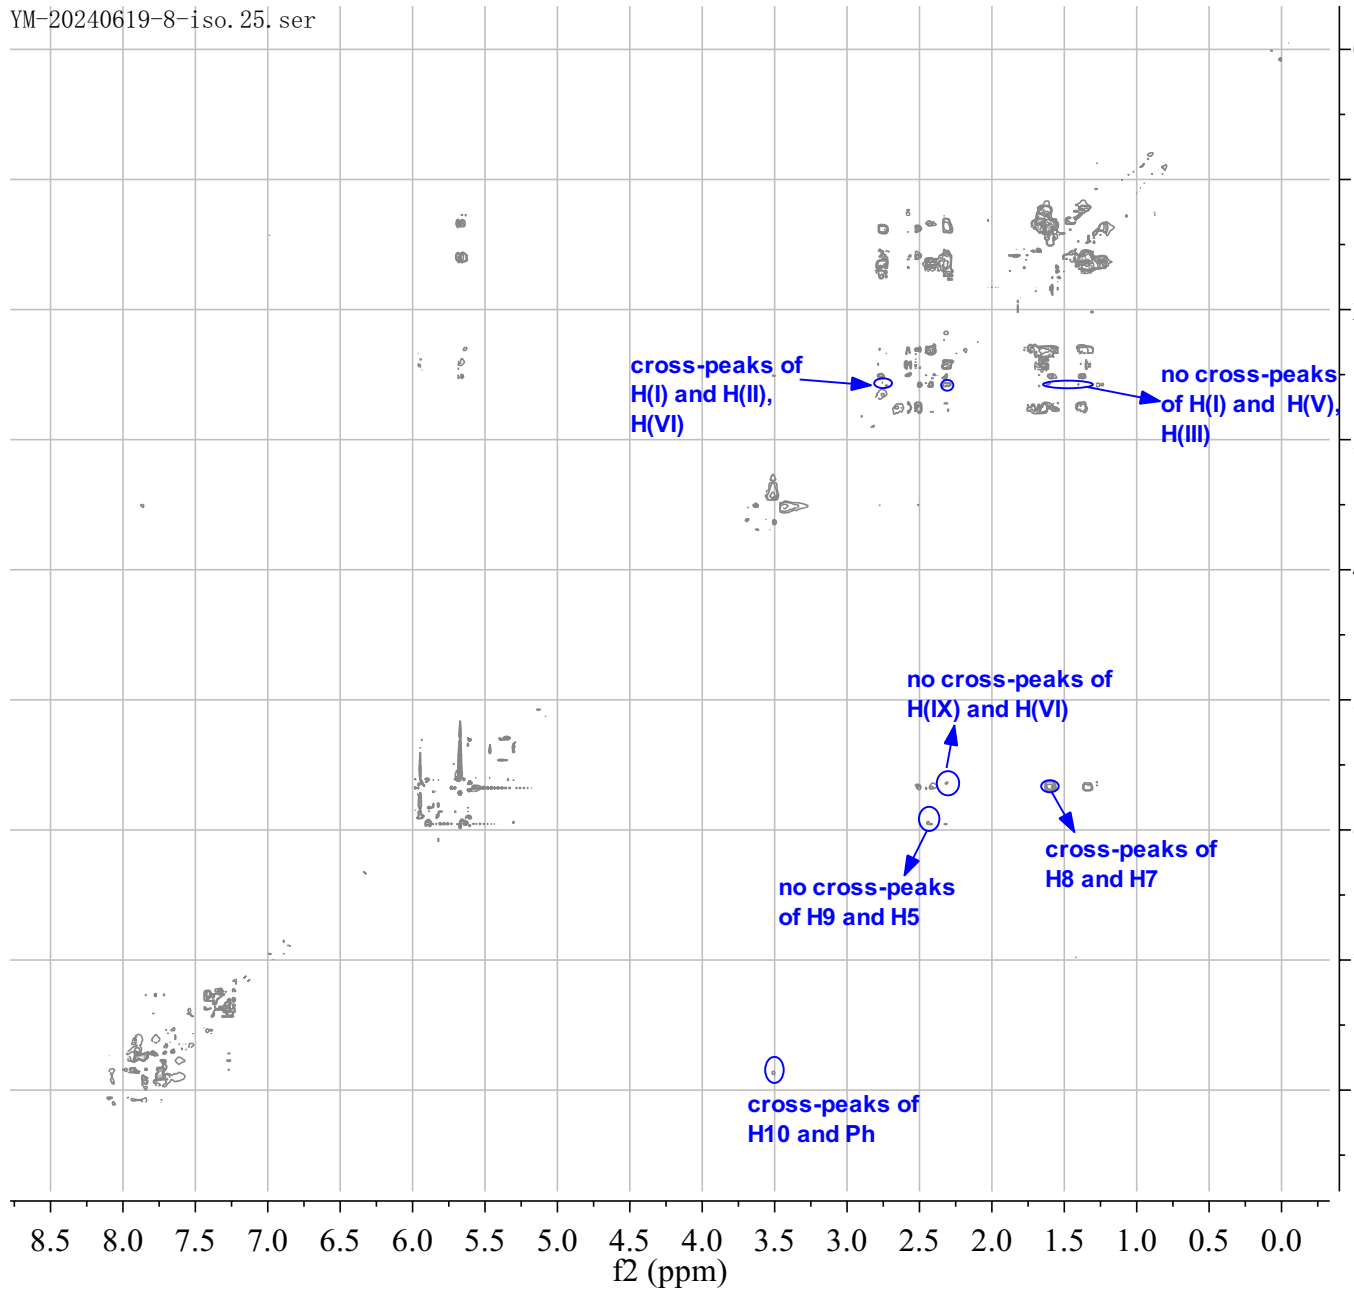

| Parameter               | Value                    |
|-------------------------|--------------------------|
| Title                   | YM-20240619-8-iso.25.ser |
| Comment                 |                          |
| Origin                  | Bruker BioSpin GmbH      |
| Owner                   | PC                       |
| Site                    |                          |
| Instrument              | spect                    |
| Solvent                 | CDC13                    |
| Temperature             | 296.7                    |
| Pulse Sequence          | noesygpphp               |
| Experiment              | NOESY                    |
| Number of Scans         | 4                        |
| Receiver Gain           | 31.7                     |
| Relaxation Delay        | 1.9754                   |
| Pulse Width             | 9.2600                   |
| Presaturation Frequency |                          |
| Acquisition Time        | 0.2806                   |
| Acquisition Date        | 2024-06-23T02:49:08      |
| Modification Date       | 2024-06-23T12:52:17      |
| Spectrometer Frequency  | (400.13, 400.13)         |
| Spectral Width          | (3649.6, 3649.6)         |
| Lowest Frequency        | (-136.9, -136.9)         |
| Nucleus                 | (1H, 1H)                 |
| Acquired Size           | (1024, 256)              |
| Spectral Size           | (1024, 1024)             |

|                         |                          |
|-------------------------|--------------------------|
| Title                   | YM-20240619-5-iso.13.fid |
| Comment                 | 24-26                    |
| Origin                  | Bruker BioSpin GmbH      |
| Owner                   | PC                       |
| Site                    |                          |
| Instrument              | spect                    |
| Solvent                 | CDC13                    |
| Temperature             | 296.7                    |
| Pulse Sequence          | zg30                     |
| Experiment              | 1D                       |
| Number of Scans         | 8                        |
| Receiver Gain           | 154.6                    |
| Relaxation Delay        | 1.0000                   |
| Pulse Width             | 9.2600                   |
| Presaturation Frequency |                          |
| Acquisition Time        | 1.9999                   |
| Acquisition Date        | 2024-06-24T00:05:26      |
| Modification Date       | 2024-06-24T10:15:23      |
| Spectrometer Frequency  | 400.13                   |
| Spectral Width          | 8012.8                   |
| Lowest Frequency        | -1535.4                  |
| Nucleus                 | 1H                       |
| Acquired Size           | 16025                    |
| Spectral Size           | 65536                    |

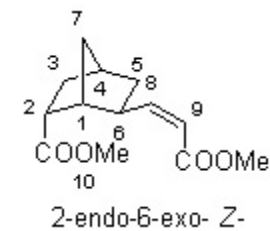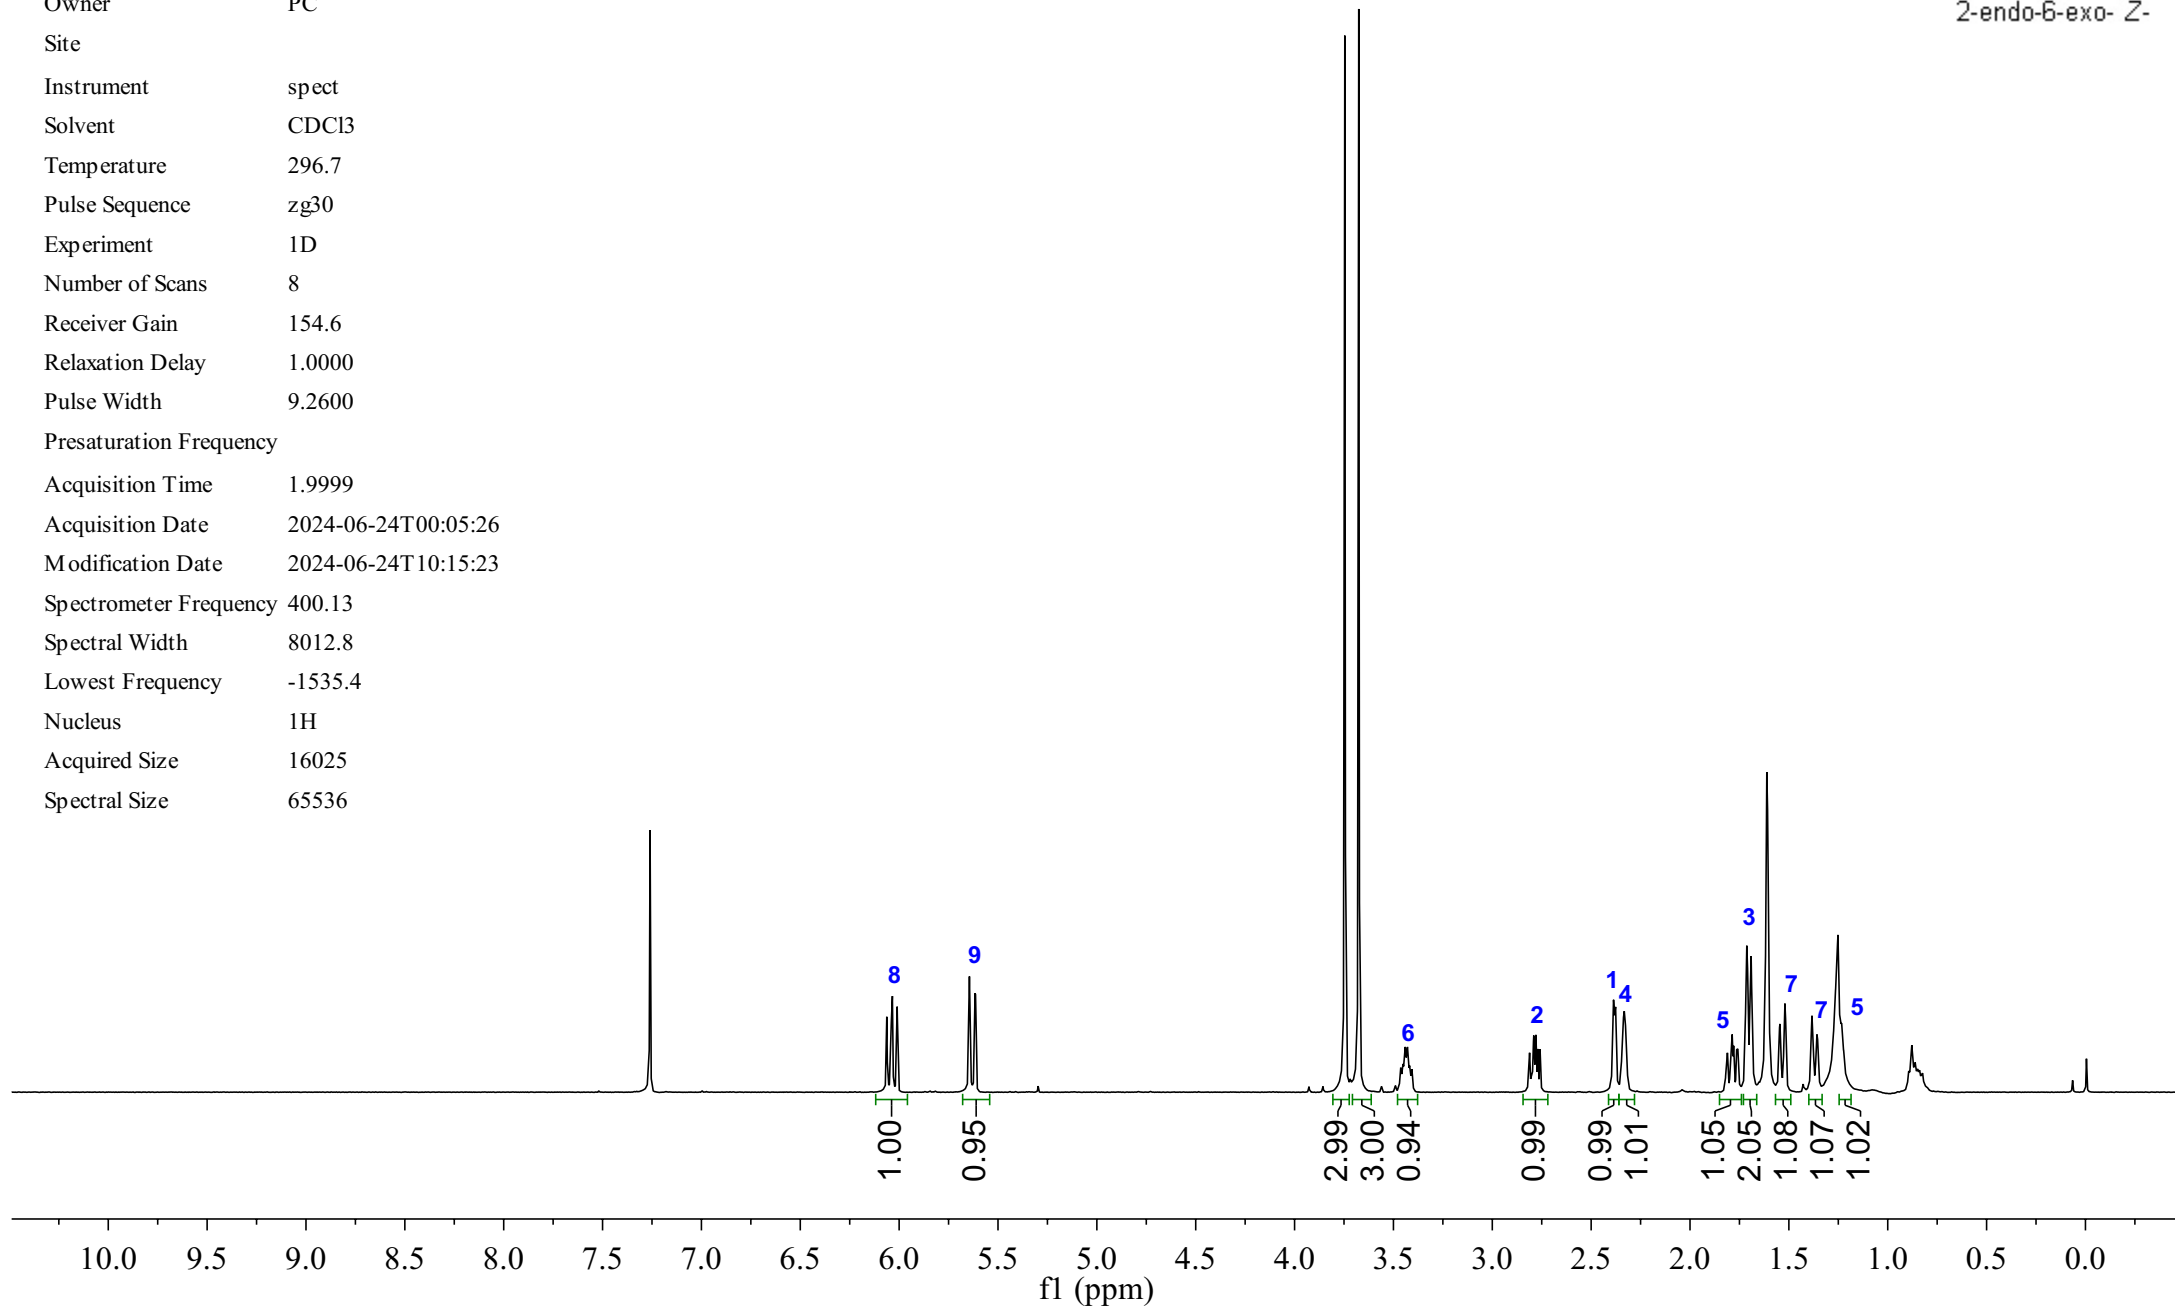



YM-20240619-5-iso.12.fid  
24-26

—175.0

—166.4

—154.6

—117.6

51.9  
51.1  
46.8  
46.1  
38.6  
37.8  
37.4  
35.8  
31.3

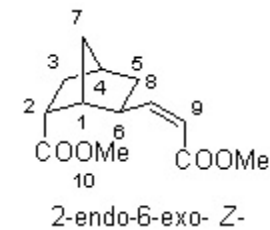

| Parameter               | Value                    |
|-------------------------|--------------------------|
| Title                   | YM-20240619-5-iso.12.fid |
| Comment                 | 24-26                    |
| Origin                  | Bruker BioSpin GmbH      |
| Owner                   | PC                       |
| Site                    |                          |
| Instrument              | spect                    |
| Solvent                 | CDCI3                    |
| Temperature             | 297.0                    |
| Pulse Sequence          | zgpg30                   |
| Experiment              | 1D                       |
| Number of Scans         | 128                      |
| Receiver Gain           | 196.4                    |
| Relaxation Delay        | 2.0000                   |
| Pulse Width             | 10.2200                  |
| Presaturation Frequency |                          |
| Acquisition Time        | 1.3631                   |
| Acquisition Date        | 2024-06-24T00:04:19      |
| Modification Date       | 2024-06-24T10:15:22      |
| Spectrometer Frequency  | 100.62                   |
| Spectral Width          | 24038.5                  |
| Lowest Frequency        | -1944.0                  |
| Nucleus                 | 13C                      |
| Acquired Size           | 32768                    |
| Spectral Size           | 65536                    |

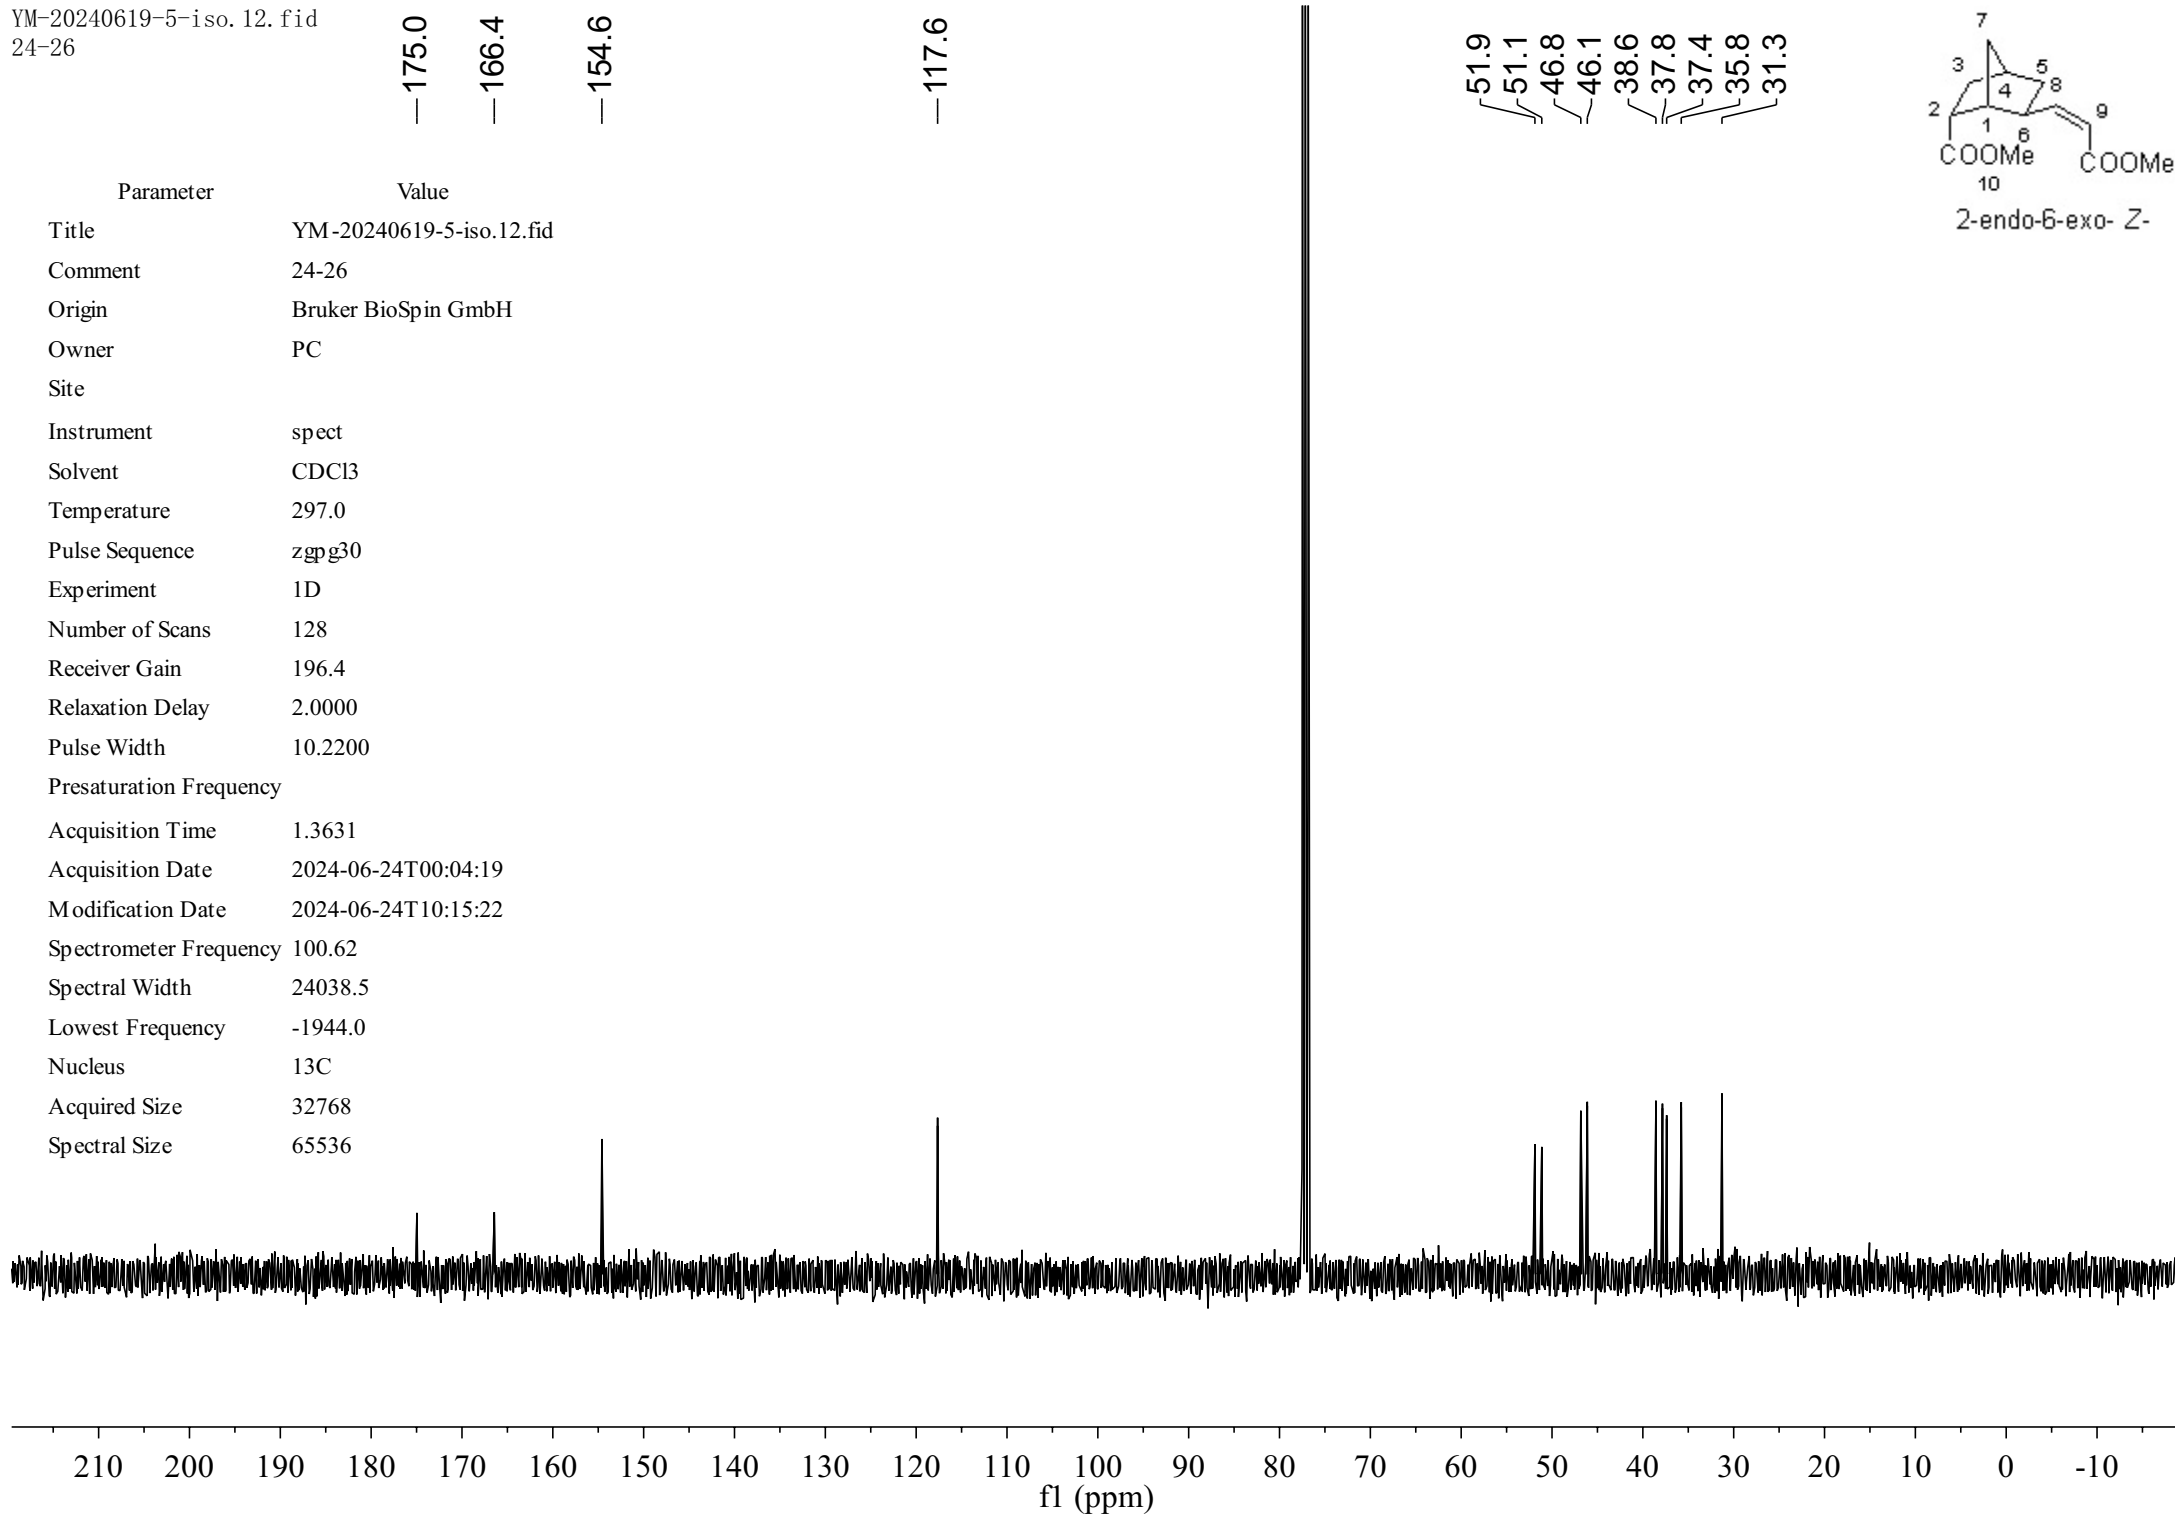

YM-20240619-5-iso.11.fid

| Parameter               | Value                    |
|-------------------------|--------------------------|
| Title                   | YM-20240619-5-iso.11.fid |
| Comment                 | 24-26                    |
| Origin                  | Bruker BioSpin GmbH      |
| Owner                   | PC                       |
| Site                    |                          |
| Instrument              | spect                    |
| Solvent                 | CDC13                    |
| Temperature             | 296.6                    |
| Pulse Sequence          | depts135                 |
| Experiment              | DEPT-135                 |
| Number of Scans         | 48                       |
| Receiver Gain           | 196.4                    |
| Relaxation Delay        | 2.0000                   |
| Pulse Width             | 10.2200                  |
| Presaturation Frequency |                          |
| Acquisition Time        | 1.3631                   |
| Acquisition Date        | 2024-06-23T23:53:18      |
| Modification Date       | 2024-06-24T10:15:22      |
| Spectrometer Frequency  | 100.62                   |
| Spectral Width          | 24038.5                  |
| Lowest Frequency        | -1958.0                  |
| Nucleus                 | <sup>13</sup> C          |
| Acquired Size           | 32768                    |
| Spectral Size           | 65536                    |

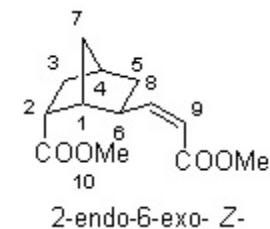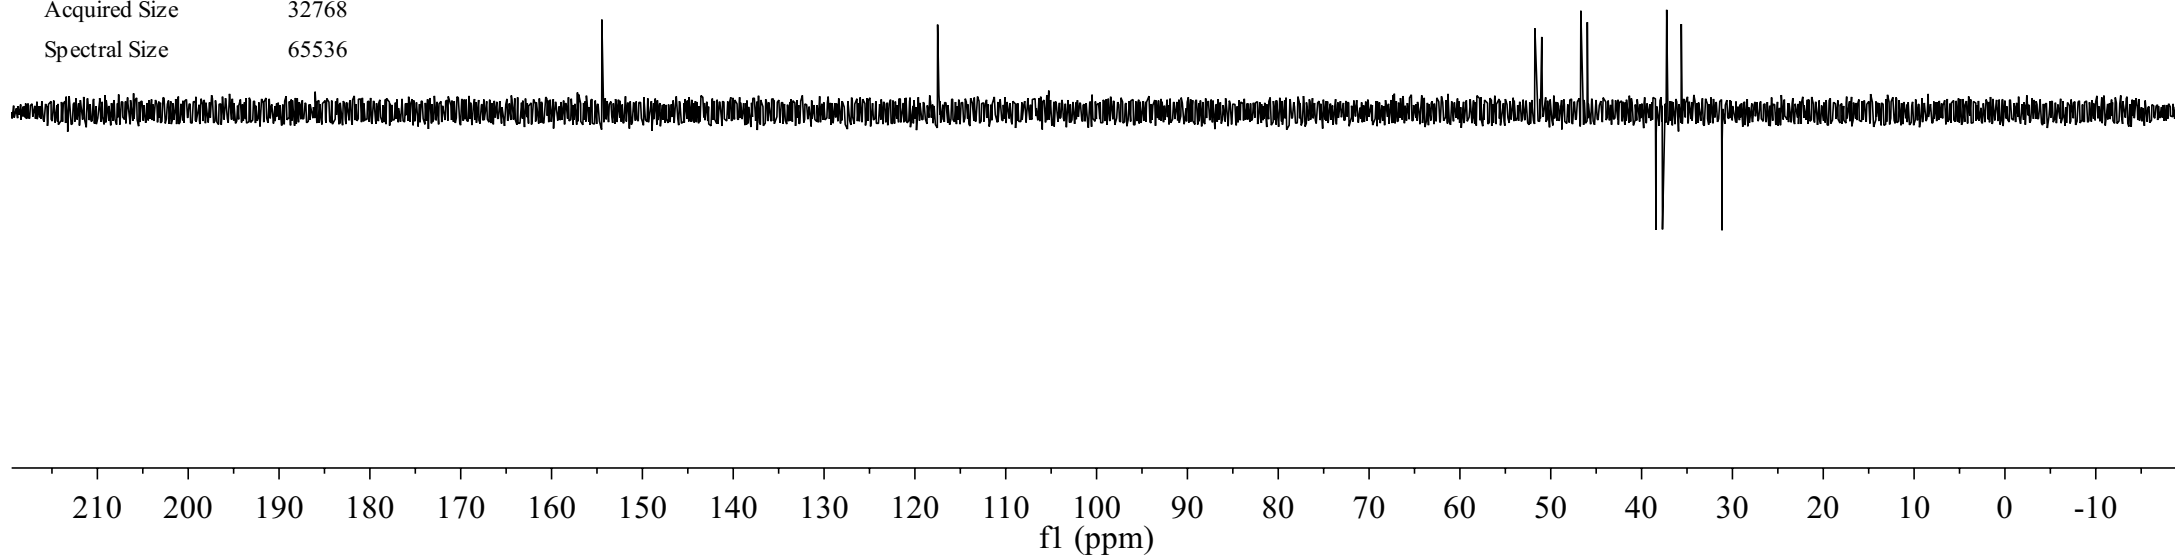

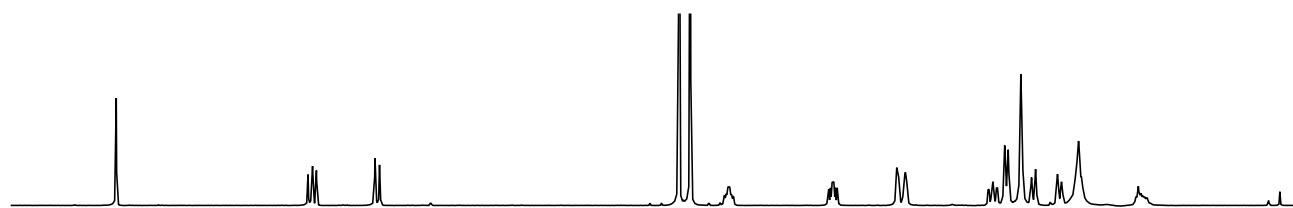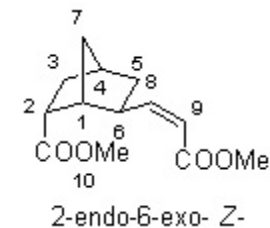

YM-20240619-5-iso.15.ser  
24-26

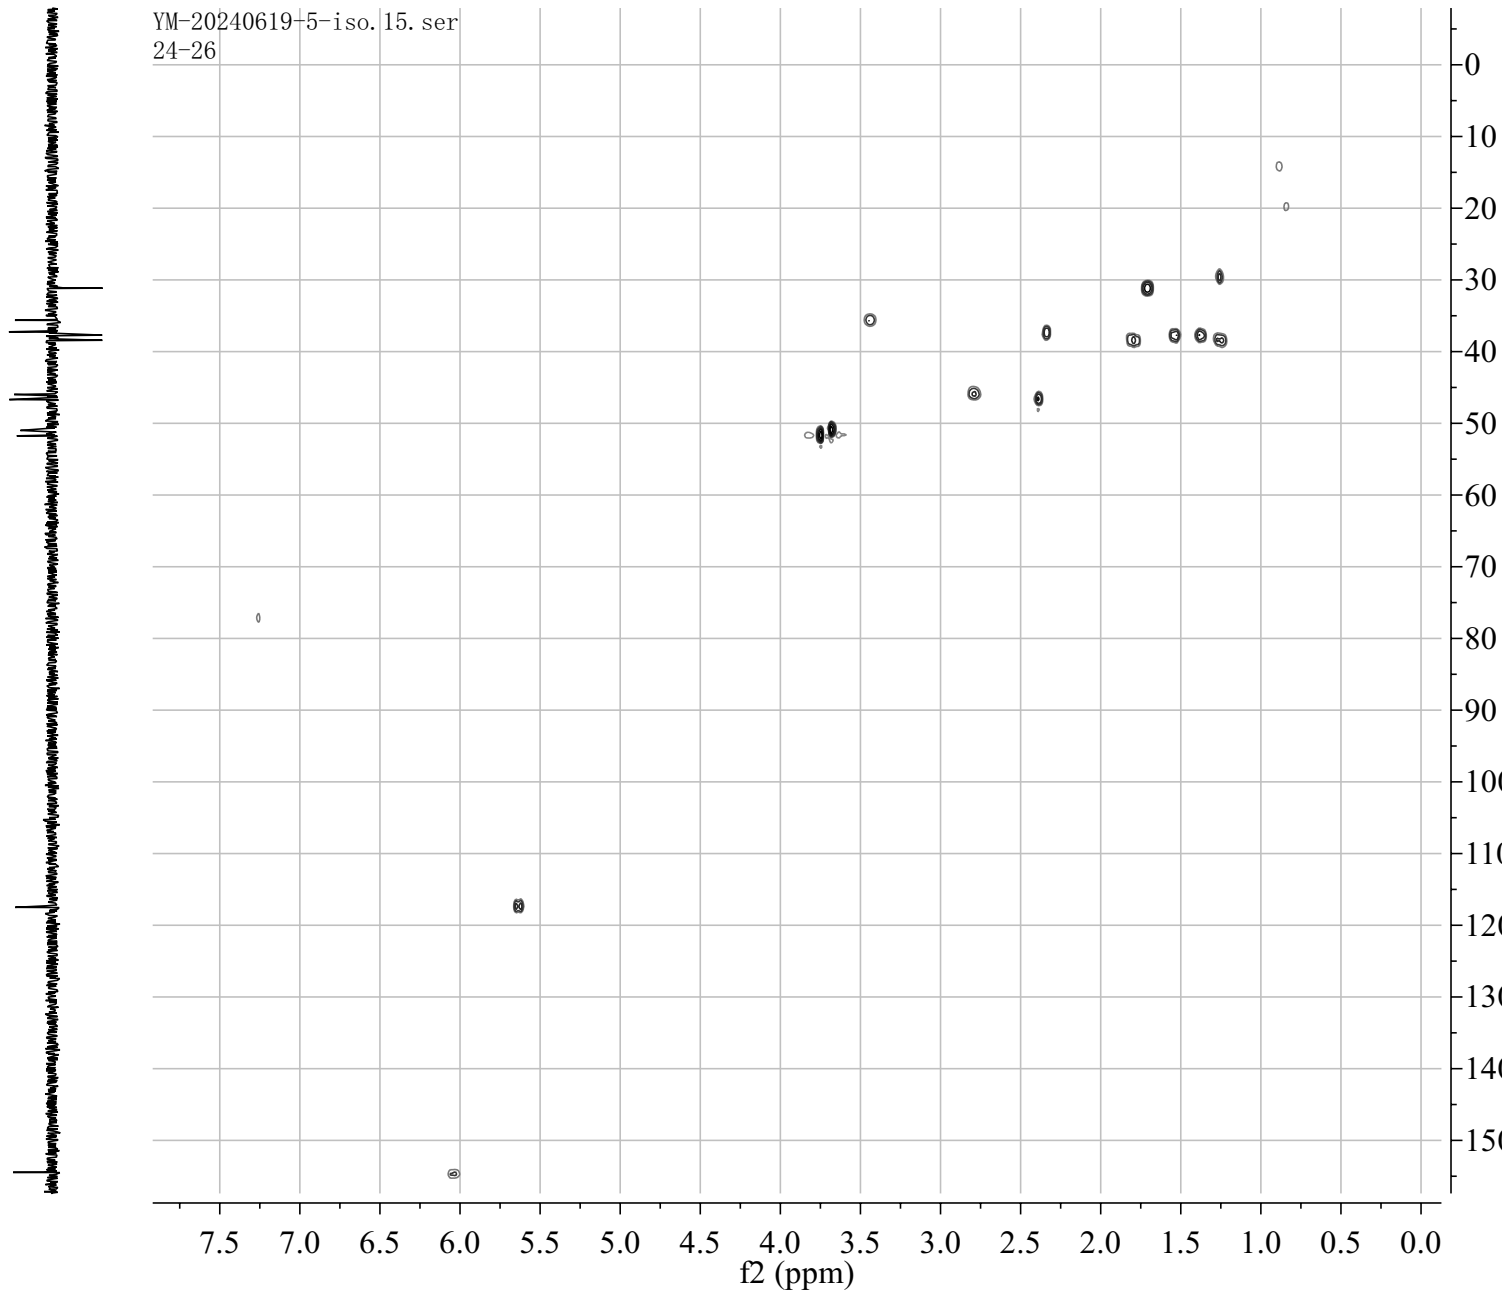

| Parameter               | Value                    |
|-------------------------|--------------------------|
| Title                   | YM-20240619-5-iso.15.ser |
| Comment                 | 24-26                    |
| Origin                  | Bruker BioSpin GmbH      |
| Owner                   | PC                       |
| Site                    |                          |
| Instrument              | spect                    |
| Solvent                 | CDCl3                    |
| Temperature             | 296.7                    |
| Pulse Sequence          | hsqcetgp                 |
| Experiment              | HSQC                     |
| Number of Scans         | 2                        |
| Receiver Gain           | 196.4                    |
| Relaxation Delay        | 1.4398                   |
| Pulse Width             | 9.2600                   |
| Presaturation Frequency |                          |
| Acquisition Time        | 0.1587                   |
| Acquisition Date        | 2024-06-24T00:12:28      |
| Modification Date       | 2024-06-24T10:15:24      |
| Spectrometer Frequency  | (400.13, 100.62)         |
| Spectral Width          | (3225.8, 16666.7)        |
| Lowest Frequency        | (-57.3, -829.1)          |
| Nucleus                 | (1H, 13C)                |
| Acquired Size           | (512, 256)               |
| Spectral Size           | (512, 512)               |

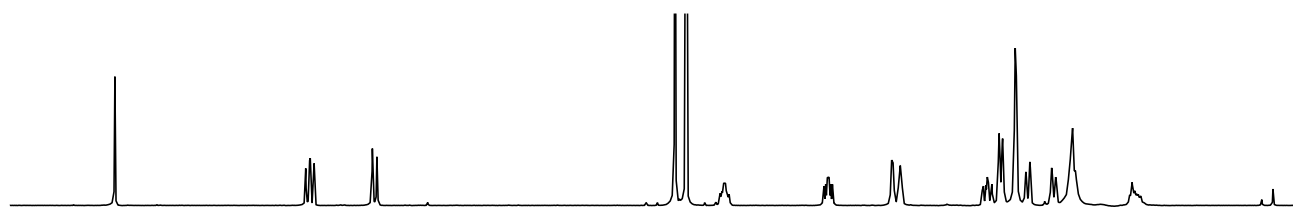

YM-20240619-5-iso.14.ser  
24-26

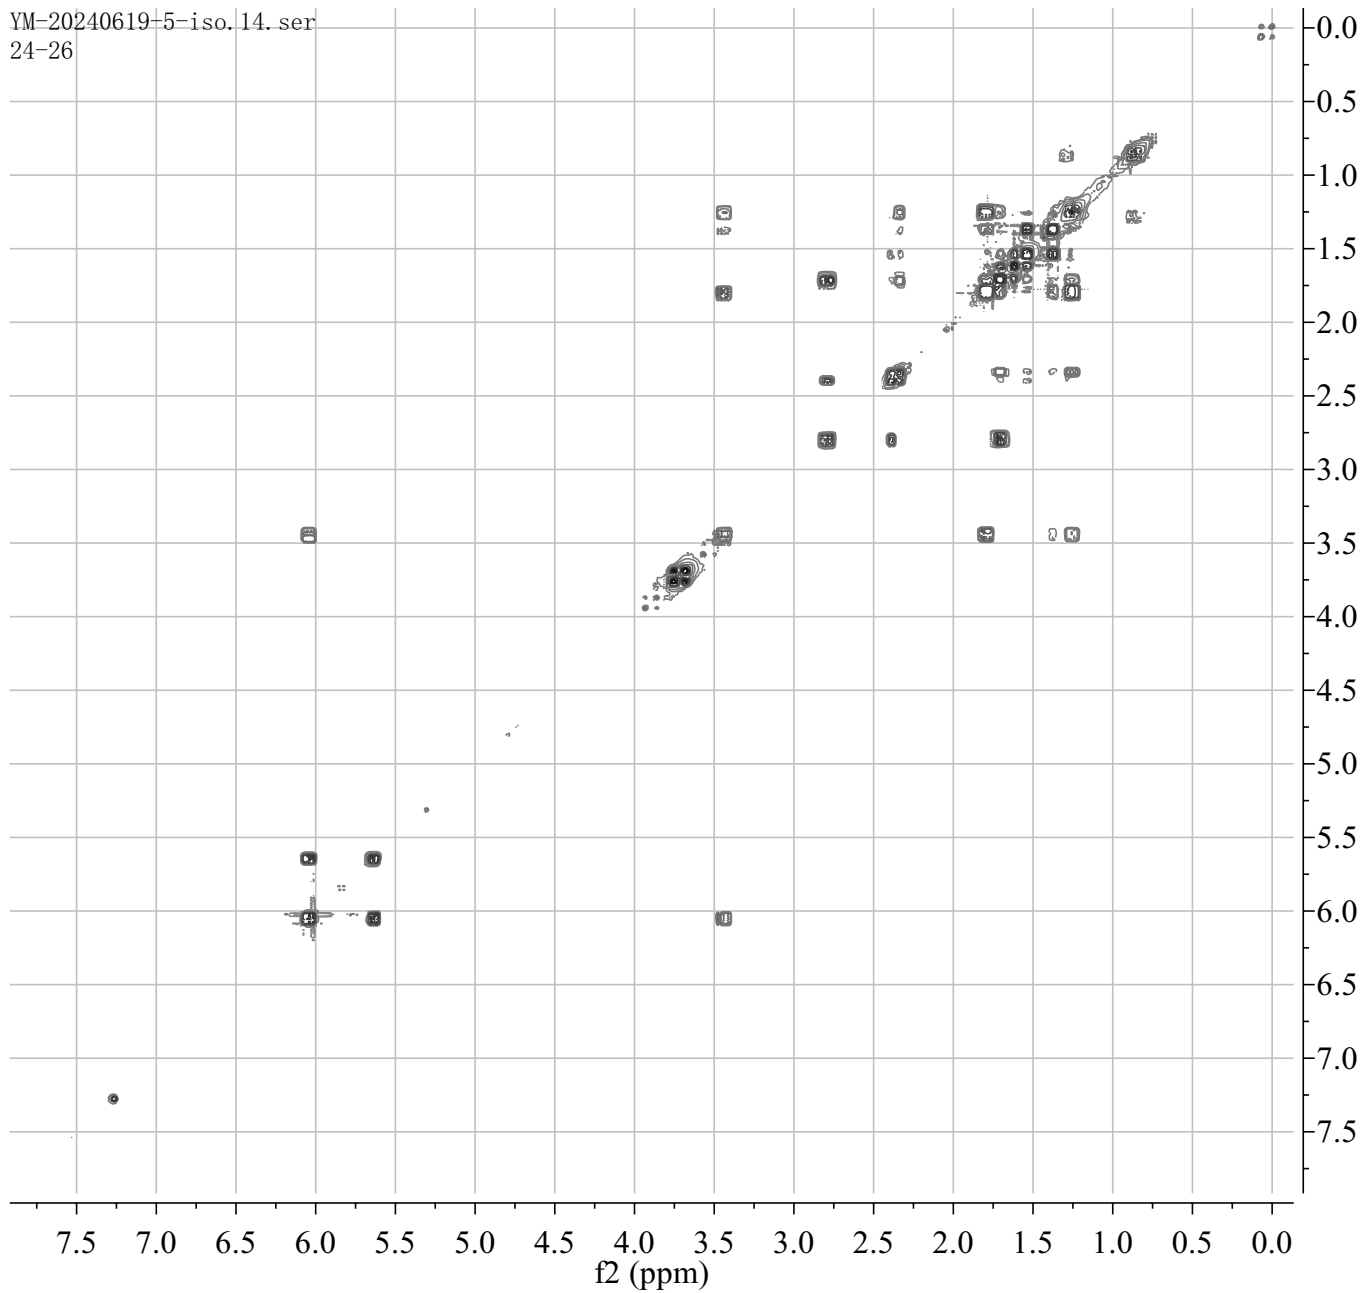

| Parameter               | Value                    |
|-------------------------|--------------------------|
| Title                   | YM-20240619-5-iso.14.ser |
| Comment                 | 24-26                    |
| Origin                  | Bruker BioSpin GmbH      |
| Owner                   | PC                       |
| Site                    |                          |
| Instrument              | spect                    |
| Solvent                 | CDCl3                    |
| Temperature             | 296.6                    |
| Pulse Sequence          | cosygpqqf                |
| Experiment              | COSY                     |
| Number of Scans         | 1                        |
| Receiver Gain           | 62.3                     |
| Relaxation Delay        | 1.8743                   |
| Pulse Width             | 9.2600                   |
| Presaturation Frequency |                          |
| Acquisition Time        | 0.3174                   |
| Acquisition Date        | 2024-06-24T00:06:20      |
| Modification Date       | 2024-06-24T10:15:23      |
| Spectrometer Frequency  | (400.13, 400.13)         |
| Spectral Width          | (3225.8, 3225.8)         |
| Lowest Frequency        | (-57.3, -57.3)           |
| Nucleus                 | (1H, 1H)                 |
| Acquired Size           | (1024, 128)              |
| Spectral Size           | (1024, 1024)             |

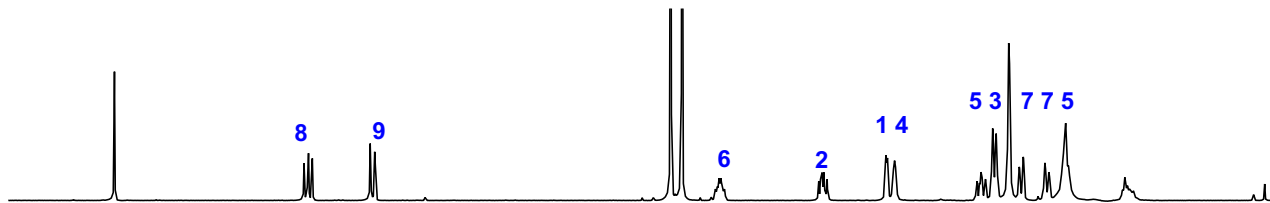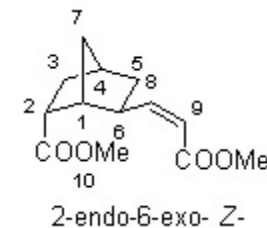

YM-20240619-5-iso.16.ser  
24-26

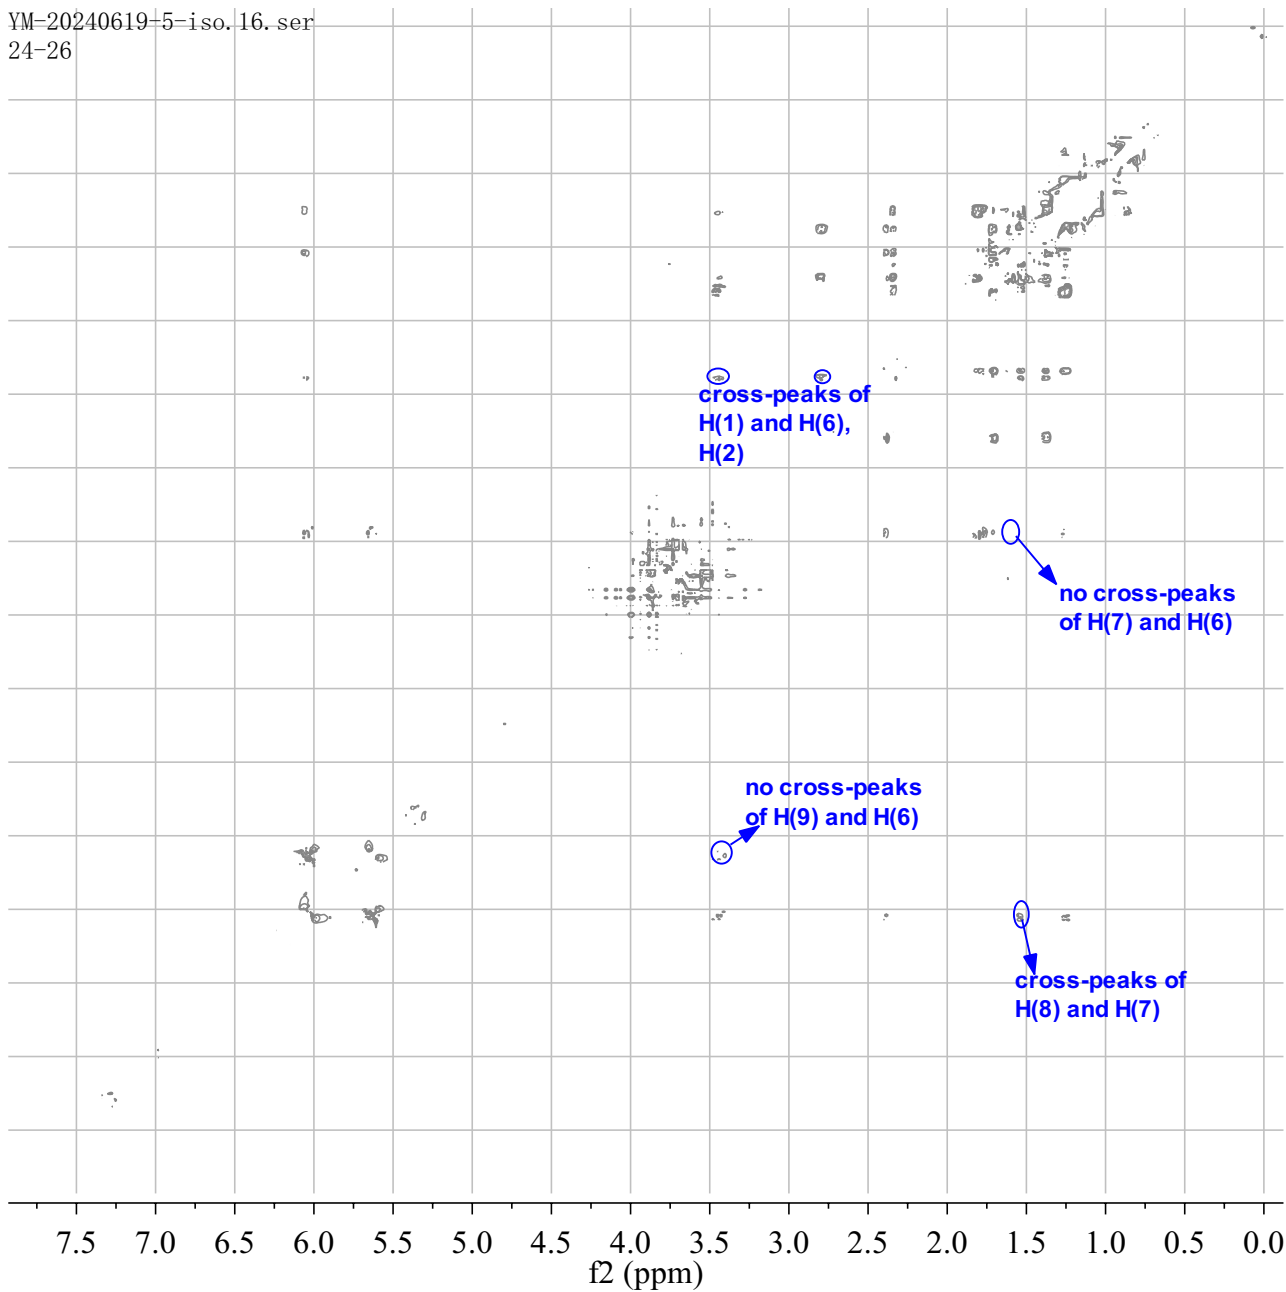

| Parameter               | Value                    |
|-------------------------|--------------------------|
| Title                   | YM-20240619-5-iso.16.ser |
| Comment                 | 24-26                    |
| Origin                  | Bruker BioSpin GmbH      |
| Owner                   | PC                       |
| Site                    |                          |
| Instrument              | spect                    |
| Solvent                 | CDCI3                    |
| Temperature             | 297.0                    |
| Pulse Sequence          | noesygp ppp              |
| Experiment              | NOESY                    |
| Number of Scans         | 4                        |
| Receiver Gain           | 62.3                     |
| Relaxation Delay        | 1.9386                   |
| Pulse Width             | 9.2600                   |
| Presaturation Frequency |                          |
| Acquisition Time        | 0.3174                   |
| Acquisition Date        | 2024-06-24T00:28:21      |
| Modification Date       | 2024-06-24T10:15:25      |
| Spectrometer Frequency  | (400.13, 400.13)         |
| Spectral Width          | (3225.8, 3225.8)         |
| Lowest Frequency        | (-52.7, -52.7)           |
| Nucleus                 | (1H, 1H)                 |
| Acquired Size           | (1024, 256)              |
| Spectral Size           | (1024, 1024)             |

| Parameter               | Value                    |
|-------------------------|--------------------------|
| Title                   | YM-20240619-5-iso.22.fid |
| Comment                 | s32-37                   |
| Origin                  | Bruker BioSpin GmbH      |
| Owner                   | PC                       |
| Site                    |                          |
| Instrument              | spect                    |
| Solvent                 | CDC13                    |
| Temperature             | 296.7                    |
| Pulse Sequence          | zg30                     |
| Experiment              | 1D                       |
| Number of Scans         | 8                        |
| Receiver Gain           | 111.4                    |
| Relaxation Delay        | 1.0000                   |
| Pulse Width             | 9.2600                   |
| Presaturation Frequency |                          |
| Acquisition Time        | 1.9999                   |
| Acquisition Date        | 2024-06-24T01:45:31      |
| Modification Date       | 2024-06-24T10:15:26      |
| Spectrometer Frequency  | 400.13                   |
| Spectral Width          | 8012.8                   |
| Lowest Frequency        | -1535.0                  |
| Nucleus                 | 1H                       |
| Acquired Size           | 16025                    |
| Spectral Size           | 65536                    |

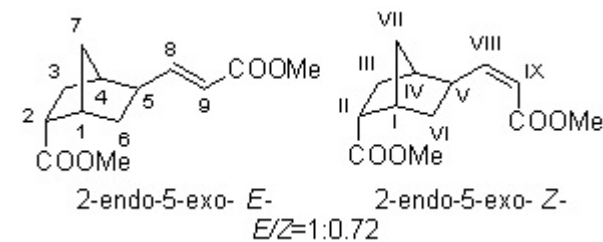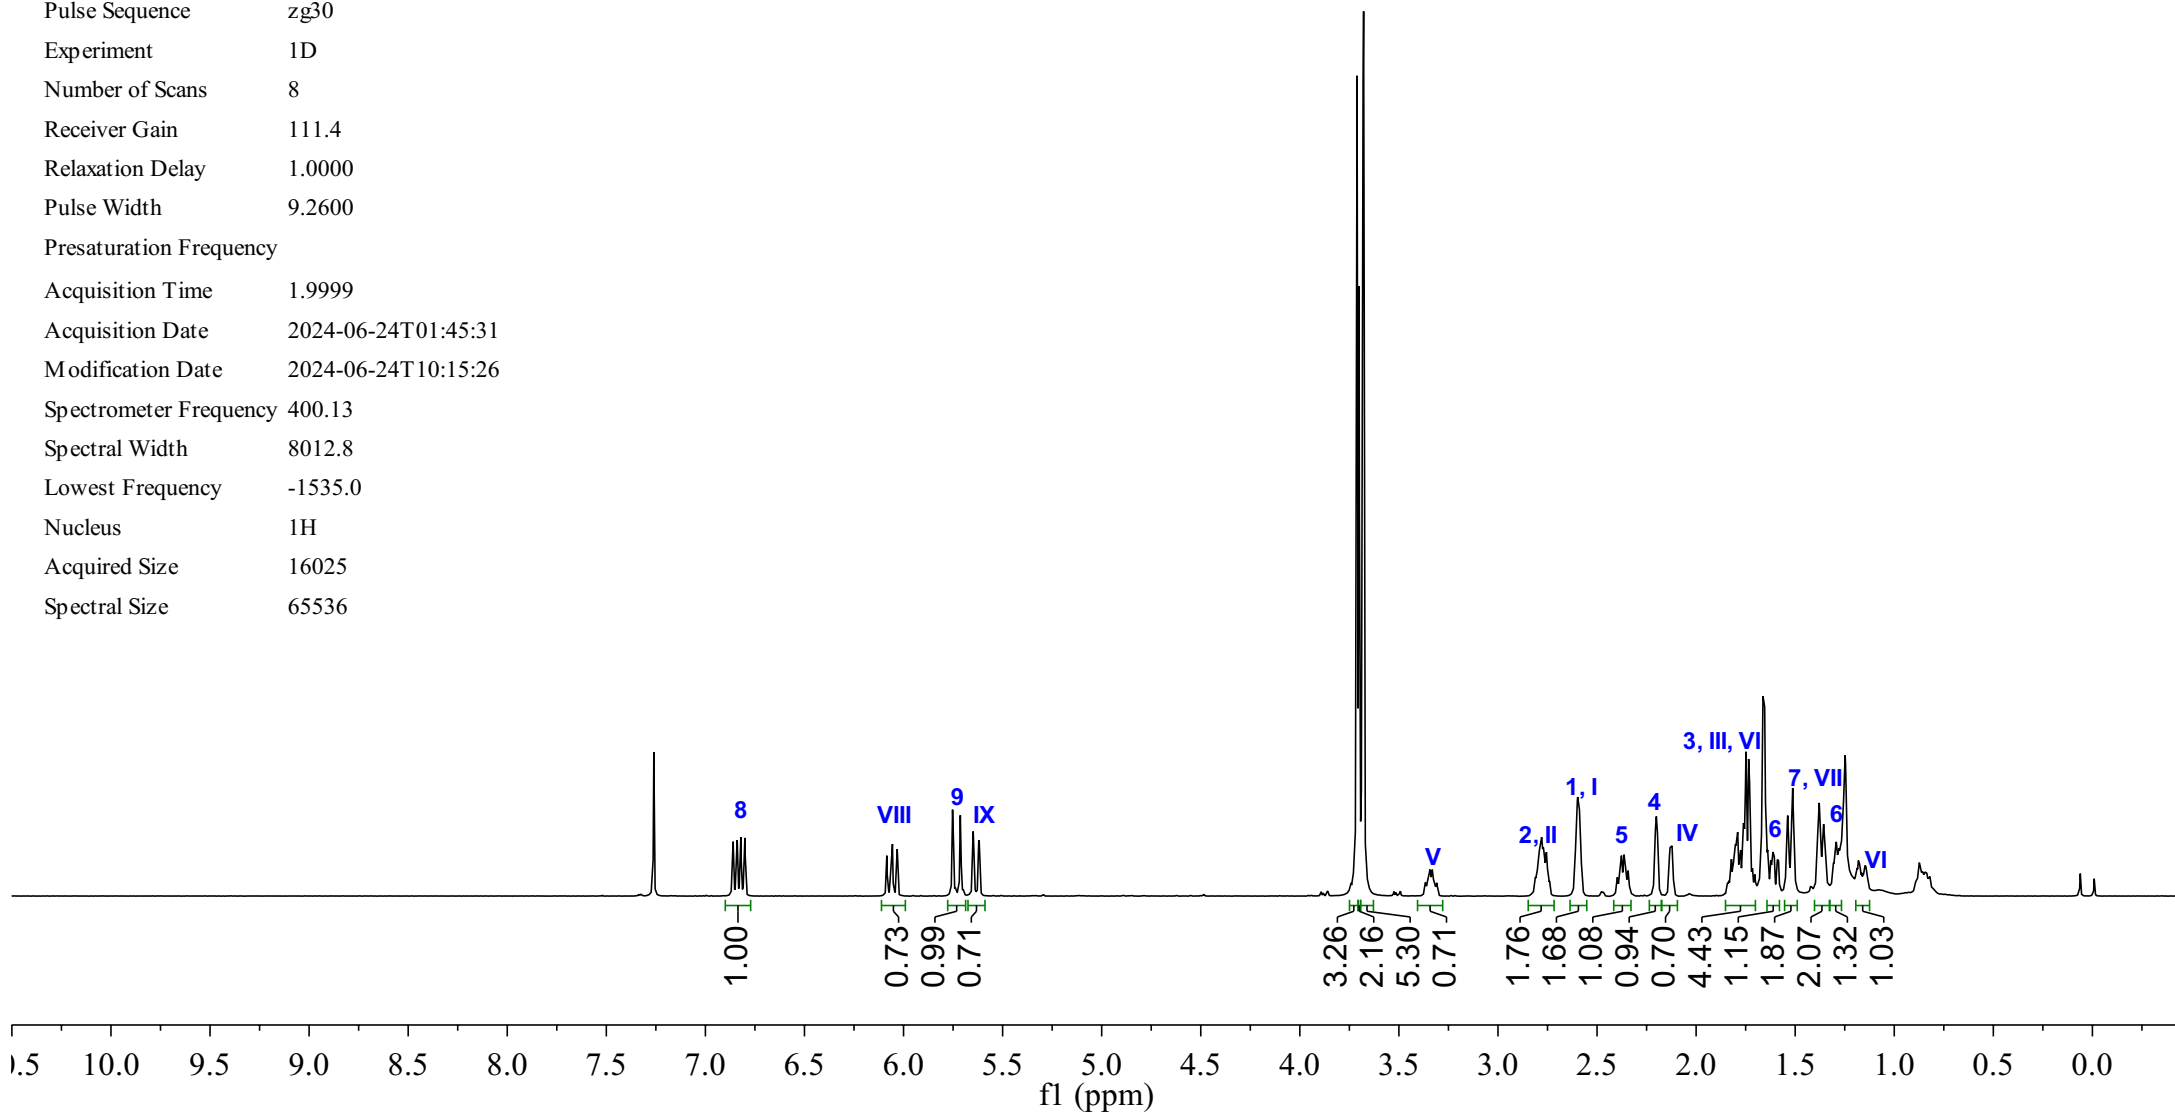

YM-20240619-5-iso. 21. fid  
s32-37

175.2  
175.0  
167.6  
166.7

155.2  
153.3

119.0  
117.5

51.8  
51.7  
51.6  
51.2  
45.4  
45.2  
43.9  
43.8  
42.5  
40.8  
40.6  
37.9  
37.8  
34.2  
32.4  
32.2  
32.0

| Parameter               | Value                    |
|-------------------------|--------------------------|
| Title                   | YM-20240619-5-iso.21.fid |
| Comment                 | s32-37                   |
| Origin                  | Bruker BioSpin GmbH      |
| Owner                   | PC                       |
| Site                    |                          |
| Instrument              | spect                    |
| Solvent                 | CDCl3                    |
| Temperature             | 297.0                    |
| Pulse Sequence          | zgpg30                   |
| Experiment              | 1D                       |
| Number of Scans         | 512                      |
| Receiver Gain           | 196.4                    |
| Relaxation Delay        | 2.0000                   |
| Pulse Width             | 10.2200                  |
| Presaturation Frequency |                          |
| Acquisition Time        | 1.3631                   |
| Acquisition Date        | 2024-06-24T01:44:23      |
| Modification Date       | 2024-06-24T10:15:25      |
| Spectrometer Frequency  | 100.62                   |
| Spectral Width          | 24038.5                  |
| Lowest Frequency        | -1944.6                  |
| Nucleus                 | 13C                      |
| Acquired Size           | 32768                    |
| Spectral Size           | 65536                    |

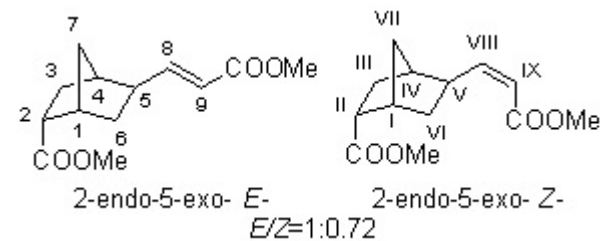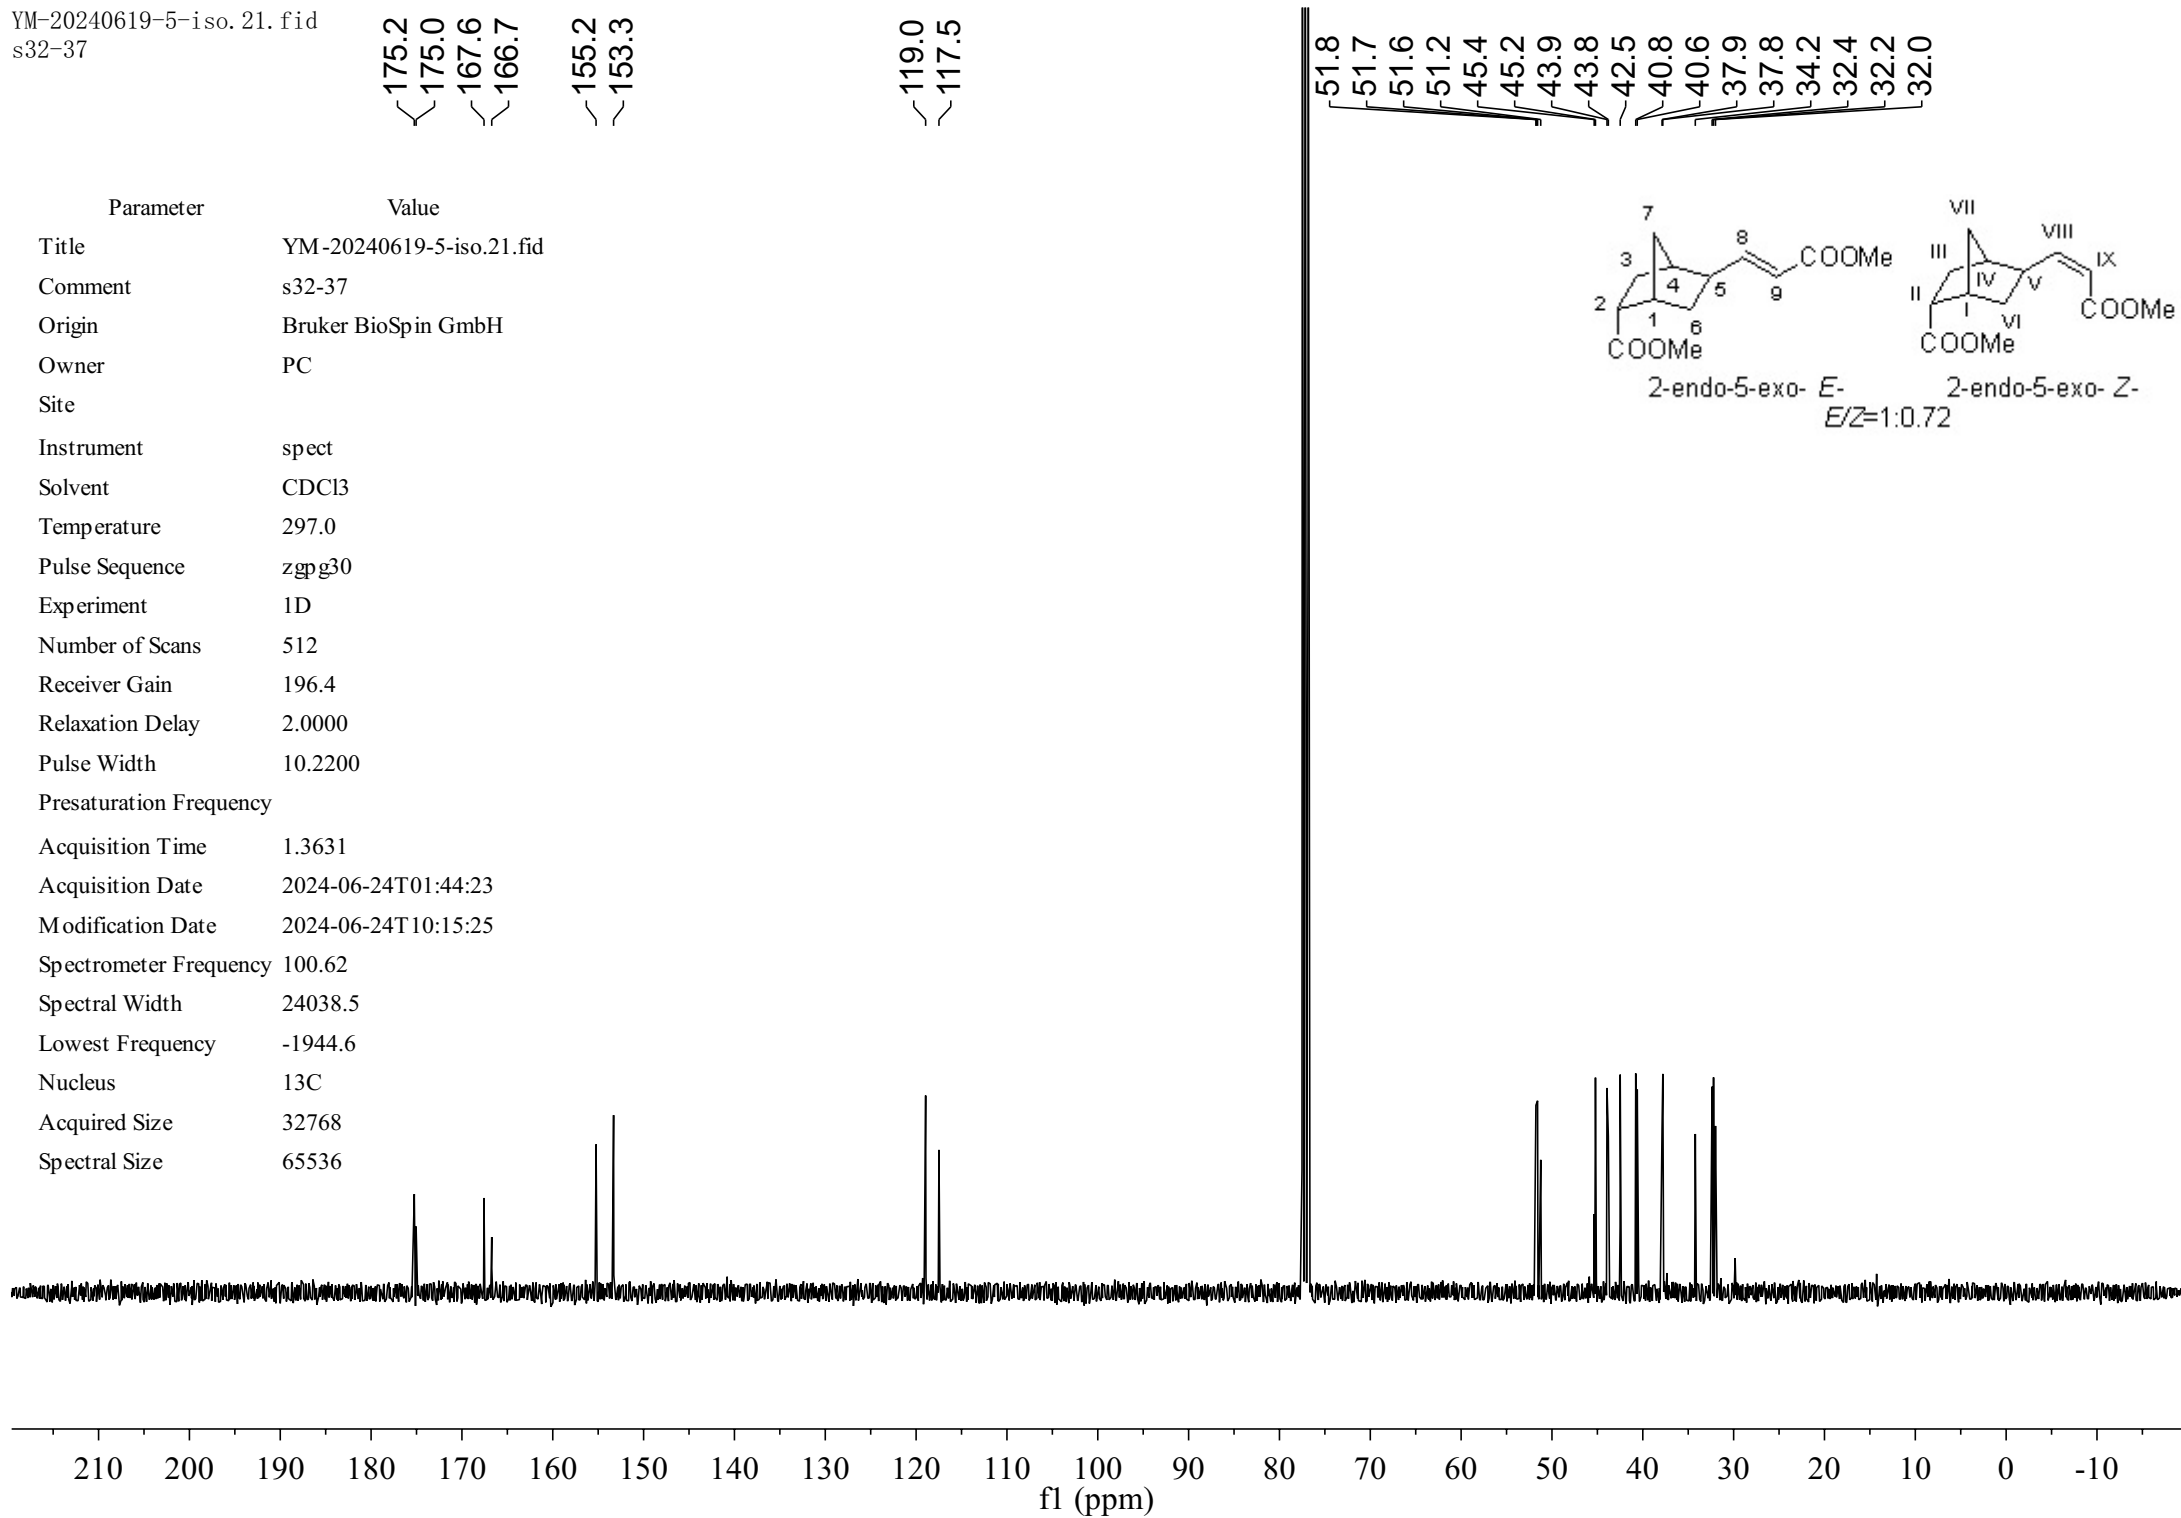

YM-20240619-5-iso. 26. fid

| Parameter               | Value                    |
|-------------------------|--------------------------|
| Title                   | YM-20240619-5-iso.26.fid |
| Comment                 | s32-37                   |
| Origin                  | Bruker BioSpin GmbH      |
| Owner                   | nmr                      |
| Site                    |                          |
| Instrument              | spect                    |
| Solvent                 | CDCI3                    |
| Temperature             | 296.1                    |
| Pulse Sequence          | depts135                 |
| Experiment              | DEPT-135                 |
| Number of Scans         | 49                       |
| Receiver Gain           | 193.1                    |
| Relaxation Delay        | 2.0000                   |
| Pulse Width             | 9.9400                   |
| Presaturation Frequency |                          |
| Acquisition Time        | 1.0486                   |
| Acquisition Date        | 2024-06-24T09:42:46      |
| Modification Date       | 2024-06-24T10:15:27      |
| Spectrometer Frequency  | 125.77                   |
| Spectral Width          | 31250.0                  |
| Lowest Frequency        | -534.1                   |
| Nucleus                 | 13C                      |
| Acquired Size           | 32768                    |
| Spectral Size           | 65536                    |

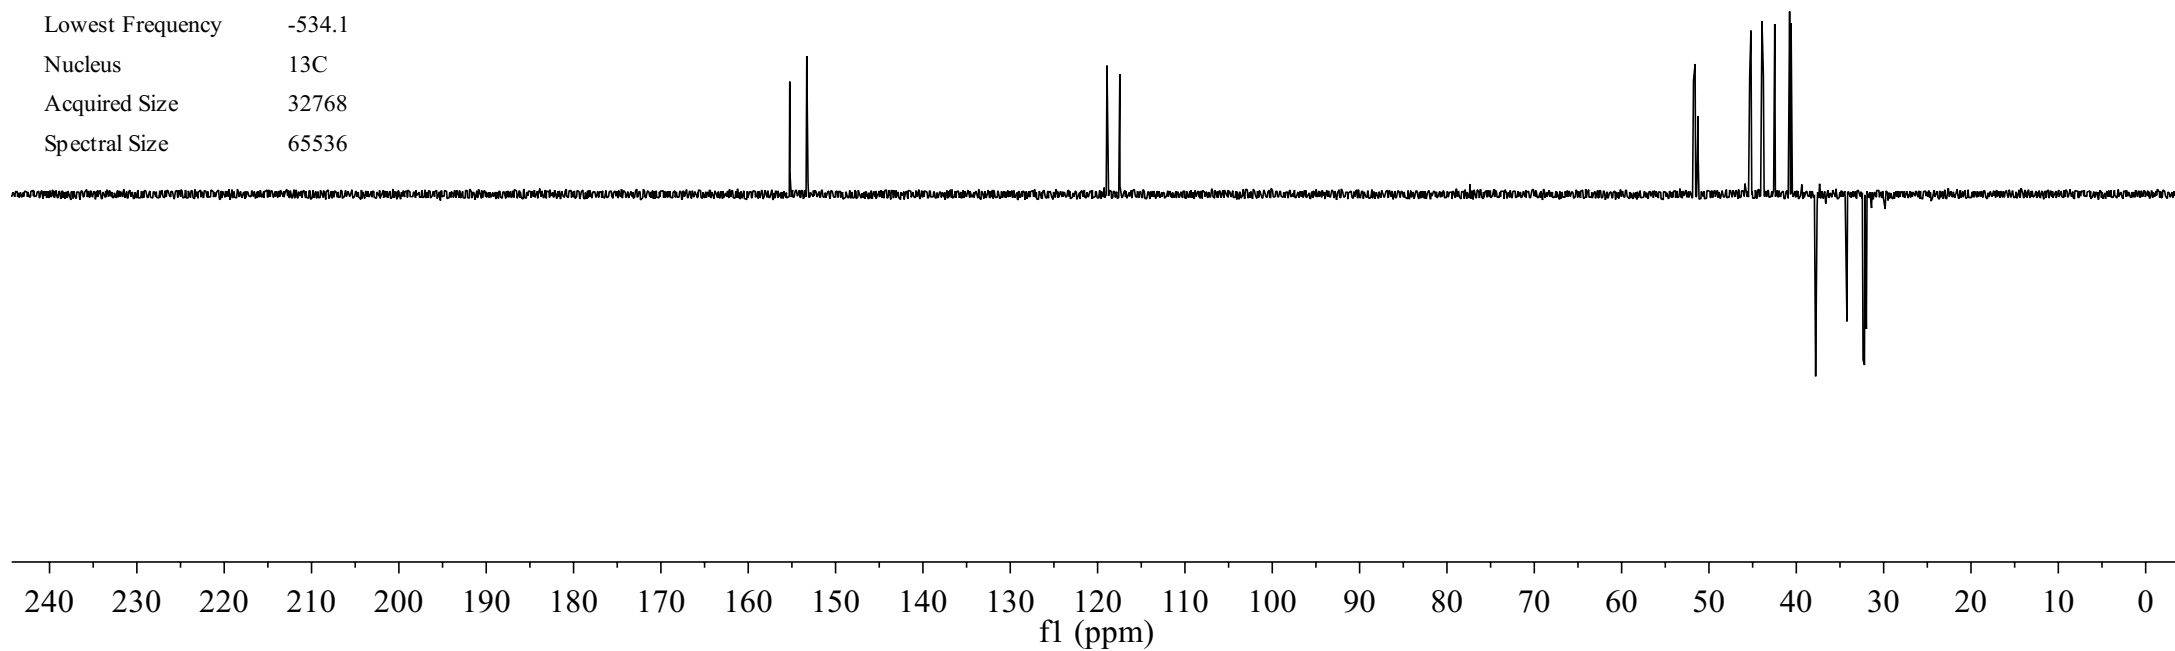



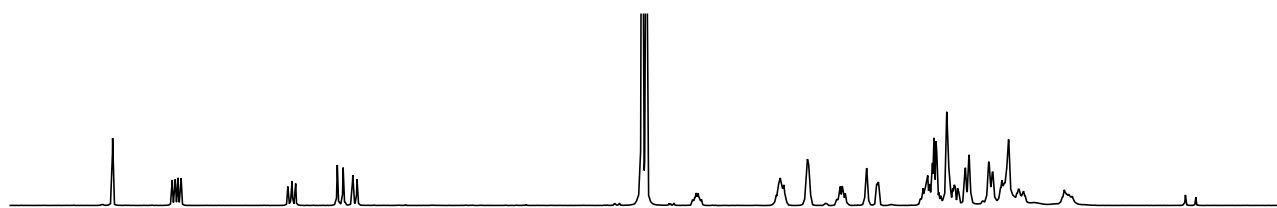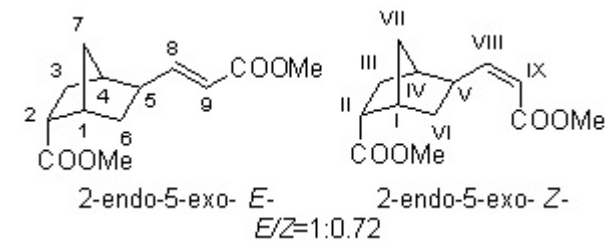

YM-20240619-5-iso.24.ser  
s32-37

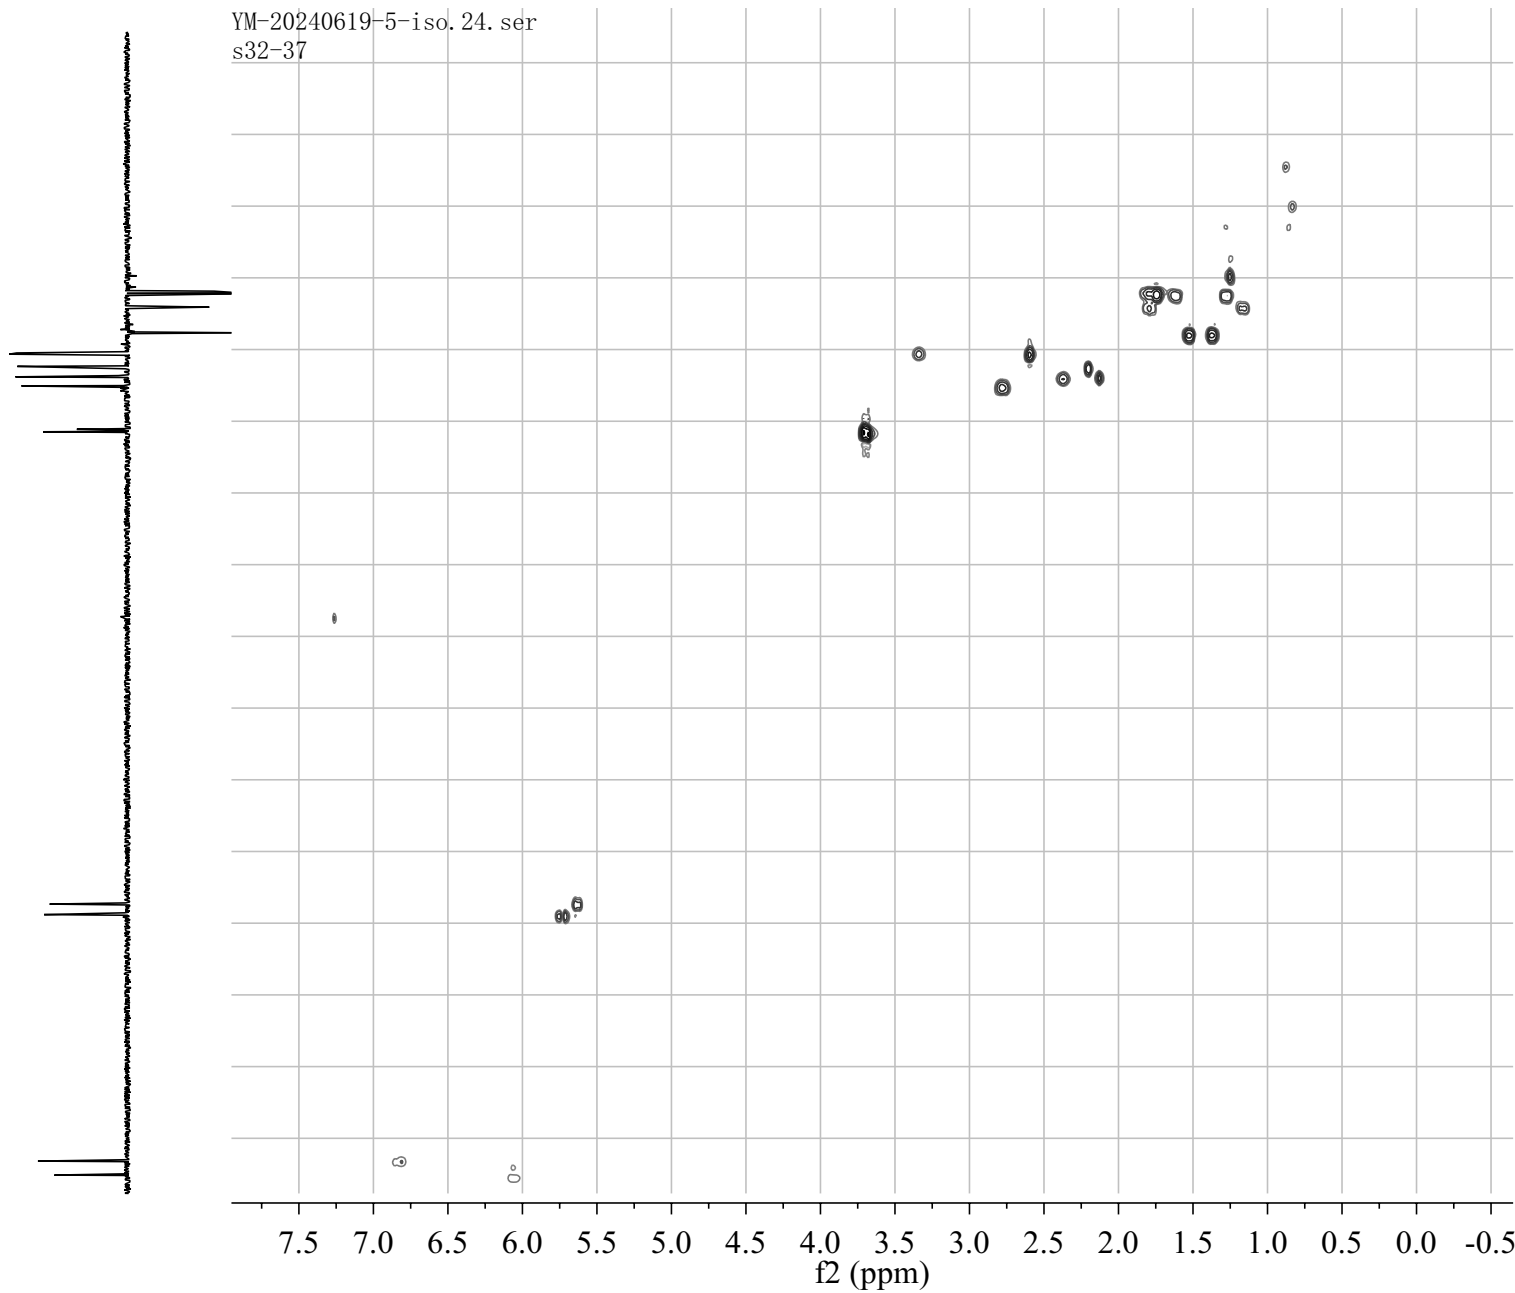

| Parameter               | Value                    |
|-------------------------|--------------------------|
| Title                   | YM-20240619-5-iso.24.ser |
| Comment                 | s32-37                   |
| Origin                  | Bruker BioSpin GmbH      |
| Owner                   | PC                       |
| Site                    |                          |
| Instrument              | spect                    |
| Solvent                 | CDCl3                    |
| Temperature             | 296.7                    |
| Pulse Sequence          | hsqcetgp                 |
| Experiment              | HSQC                     |
| Number of Scans         | 2                        |
| Receiver Gain           | 196.4                    |
| Relaxation Delay        | 1.4500                   |
| Pulse Width             | 9.2600                   |
| Presaturation Frequency |                          |
| Acquisition Time        | 0.1485                   |
| Acquisition Date        | 2024-06-24T01:57:29      |
| Modification Date       | 2024-06-24T10:15:27      |
| Spectrometer Frequency  | (400.13, 100.62)         |
| Spectral Width          | (3448.3, 16666.7)        |
| Lowest Frequency        | (-291.8, -829.1)         |
| Nucleus                 | (1H, 13C)                |
| Acquired Size           | (512, 256)               |
| Spectral Size           | (512, 512)               |

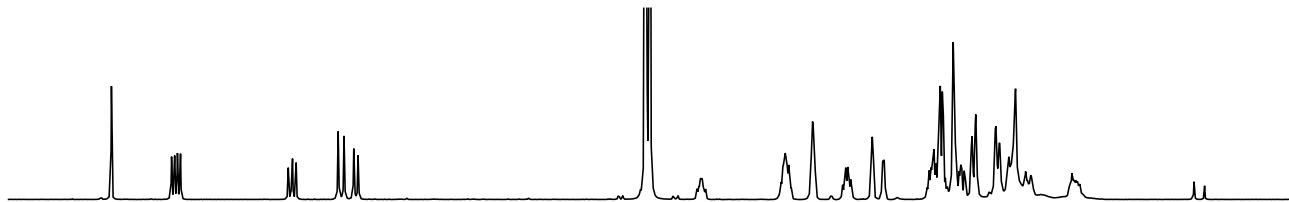

YM-20240619-5-iso.23.ser  
s32-37

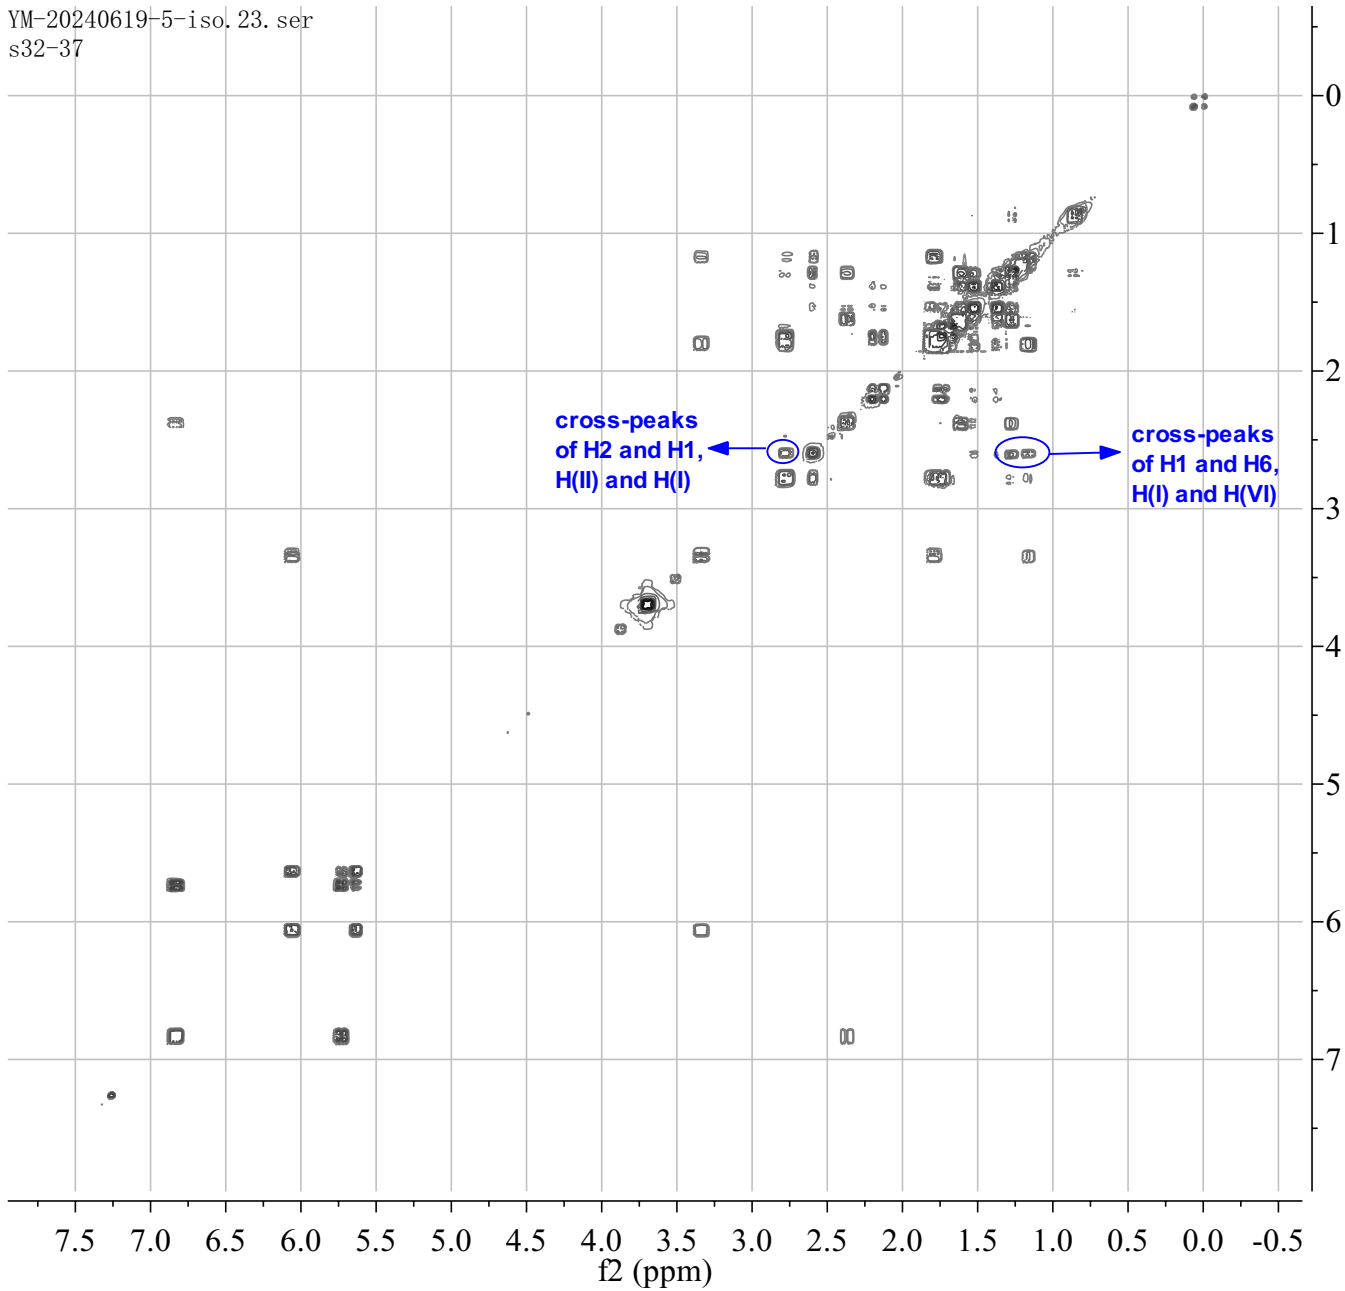

| Parameter               | Value                             |
|-------------------------|-----------------------------------|
| Title                   | YM-20240619-5-iso.23.ser          |
| Comment                 | s32-37                            |
| Origin                  | Bruker BioSpin GmbH               |
| Owner                   | PC                                |
| Site                    |                                   |
| Instrument              | spect                             |
| Solvent                 | CDCl <sub>3</sub>                 |
| Temperature             | 296.6                             |
| Pulse Sequence          | cosygpppqf                        |
| Experiment              | COSY                              |
| Number of Scans         | 2                                 |
| Receiver Gain           | 31.7                              |
| Relaxation Delay        | 1.8947                            |
| Pulse Width             | 9.2600                            |
| Presaturation Frequency |                                   |
| Acquisition Time        | 0.2970                            |
| Acquisition Date        | 2024-06-24T01:46:36               |
| Modification Date       | 2024-06-24T10:15:26               |
| Spectrometer Frequency  | (400.13, 400.13)                  |
| Spectral Width          | (3448.3, 3448.3)                  |
| Lowest Frequency        | (-291.8, -291.8)                  |
| Nucleus                 | ( <sup>1</sup> H, <sup>1</sup> H) |
| Acquired Size           | (1024, 128)                       |
| Spectral Size           | (1024, 1024)                      |

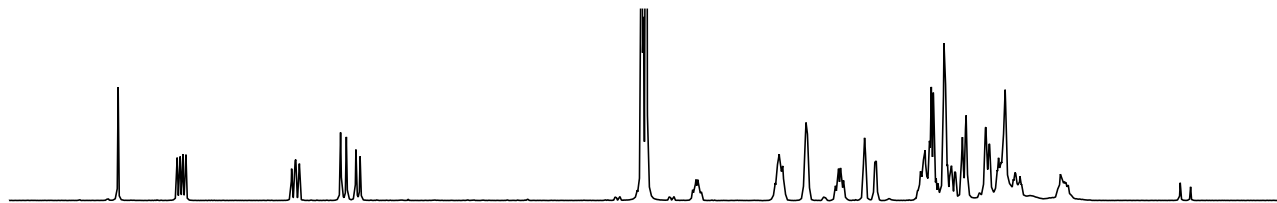

YM-20240619-5-iso.25.ser  
s32-37

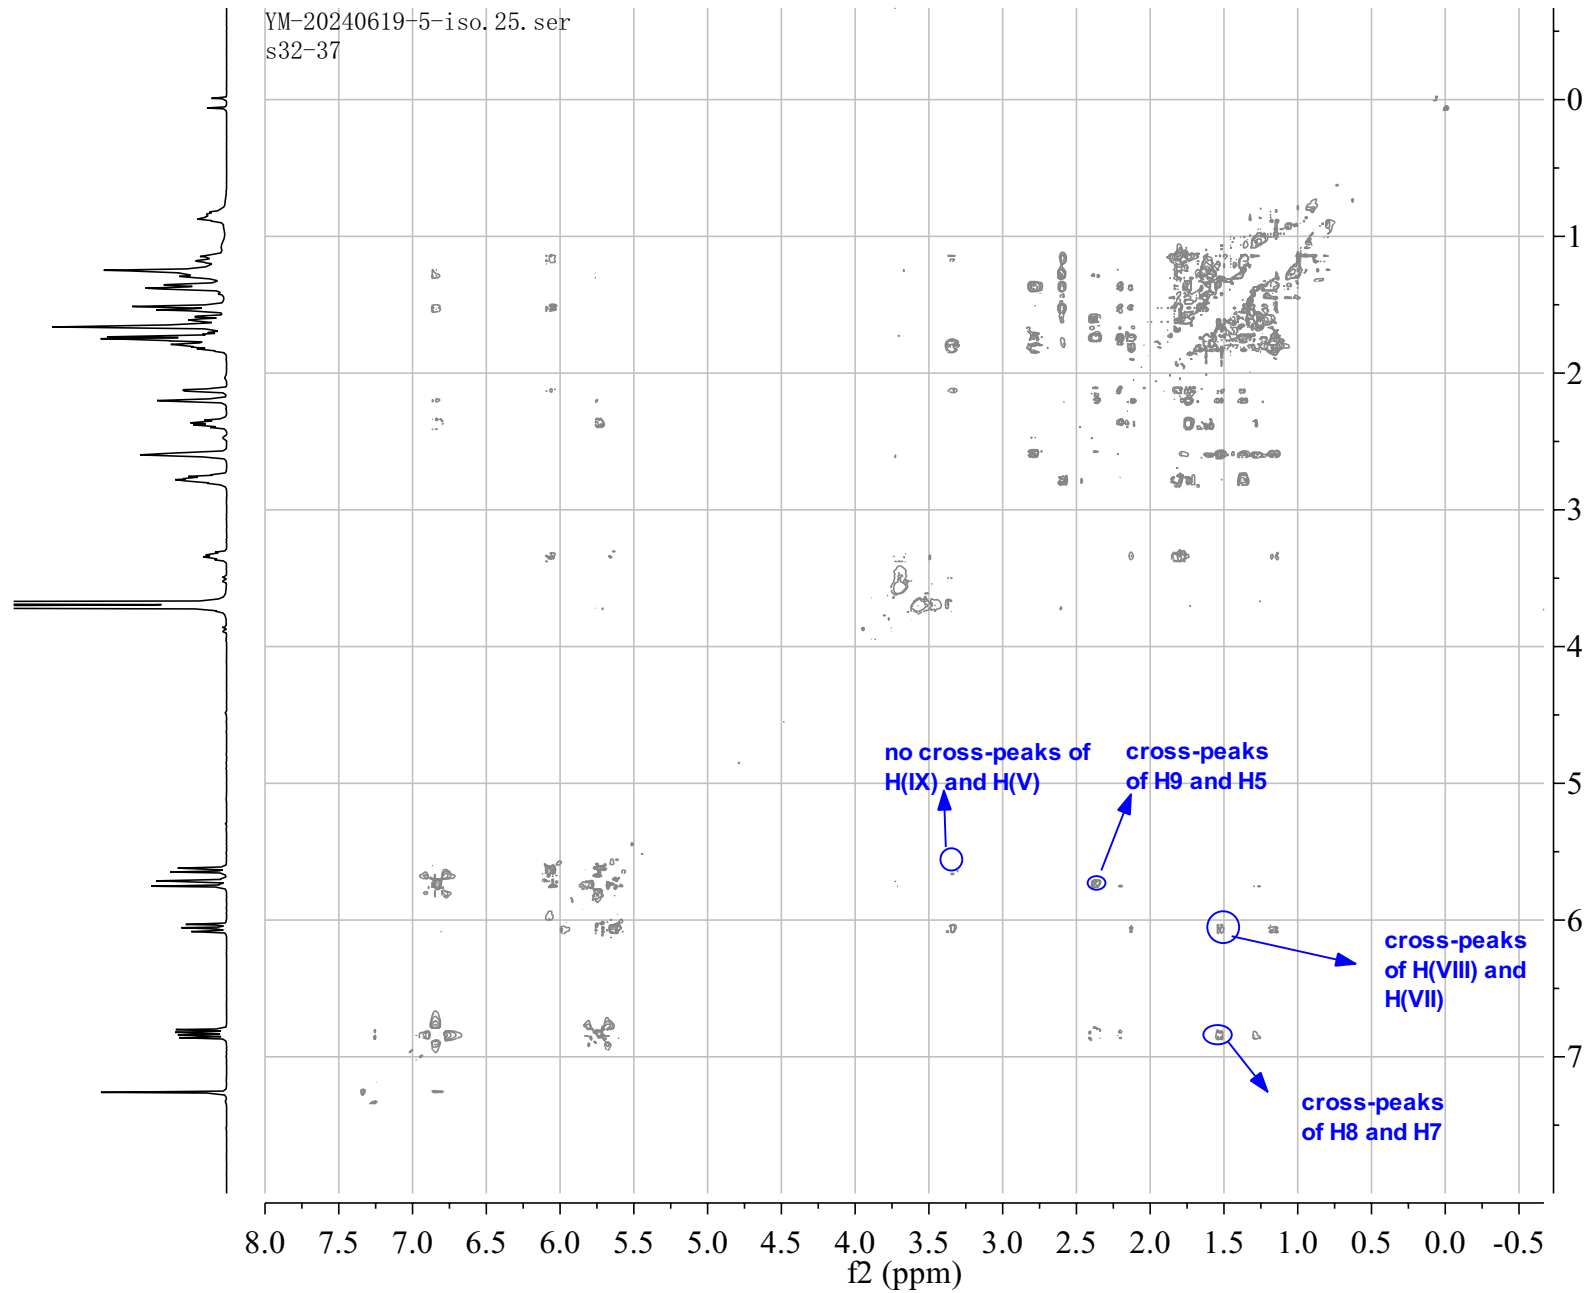

| Parameter               | Value                    |
|-------------------------|--------------------------|
| Title                   | YM-20240619-5-iso.25.ser |
| Comment                 | s32-37                   |
| Origin                  | Bruker BioSpin GmbH      |
| Owner                   | PC                       |
| Site                    |                          |
| Instrument              | spect                    |
| Solvent                 | CDCI3                    |
| Temperature             | 296.5                    |
| Pulse Sequence          | noesygpphpp              |
| Experiment              | NOESY                    |
| Number of Scans         | 4                        |
| Receiver Gain           | 31.7                     |
| Relaxation Delay        | 1.9611                   |
| Pulse Width             | 9.2600                   |
| Presaturation Frequency |                          |
| Acquisition Time        | 0.2949                   |
| Acquisition Date        | 2024-06-24T02:13:32      |
| Modification Date       | 2024-06-24T10:15:27      |
| Spectrometer Frequency  | (400.13, 400.13)         |
| Spectral Width          | (3472.2, 3472.2)         |
| Lowest Frequency        | (-271.1, -271.5)         |
| Nucleus                 | (1H, 1H)                 |
| Acquired Size           | (1024, 256)              |
| Spectral Size           | (1024, 1024)             |

| Parameter               | Value                  |
|-------------------------|------------------------|
| Title                   | YM-20220406-2-4.11.fid |
| Comment                 |                        |
| Origin                  | Bruker BioSpin GmbH    |
| Owner                   | nmr                    |
| Site                    |                        |
| Instrument              | spect                  |
| Solvent                 | CDC13                  |
| Temperature             | 296.4                  |
| Pulse Sequence          | zg30                   |
| Experiment              | 1D                     |
| Number of Scans         | 16                     |
| Receiver Gain           | 31.7                   |
| Relaxation Delay        | 1.0000                 |
| Pulse Width             | 9.1500                 |
| Presaturation Frequency |                        |
| Acquisition Time        | 1.9999                 |
| Acquisition Date        | 2022-04-10T19:51:16    |
| Modification Date       | 2022-04-11T09:19:28    |
| Spectrometer Frequency  | 400.13                 |
| Spectral Width          | 8012.8                 |
| Lowest Frequency        | -1534.8                |
| Nucleus                 | 1H                     |
| Acquired Size           | 16025                  |
| Spectral Size           | 65536                  |

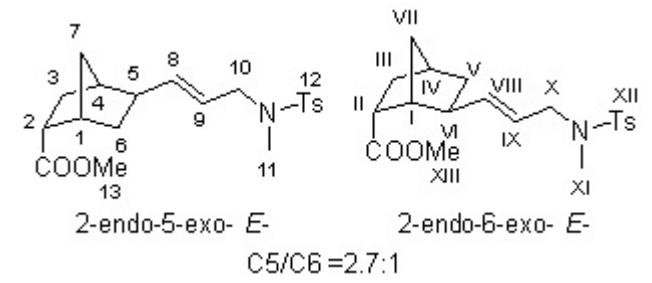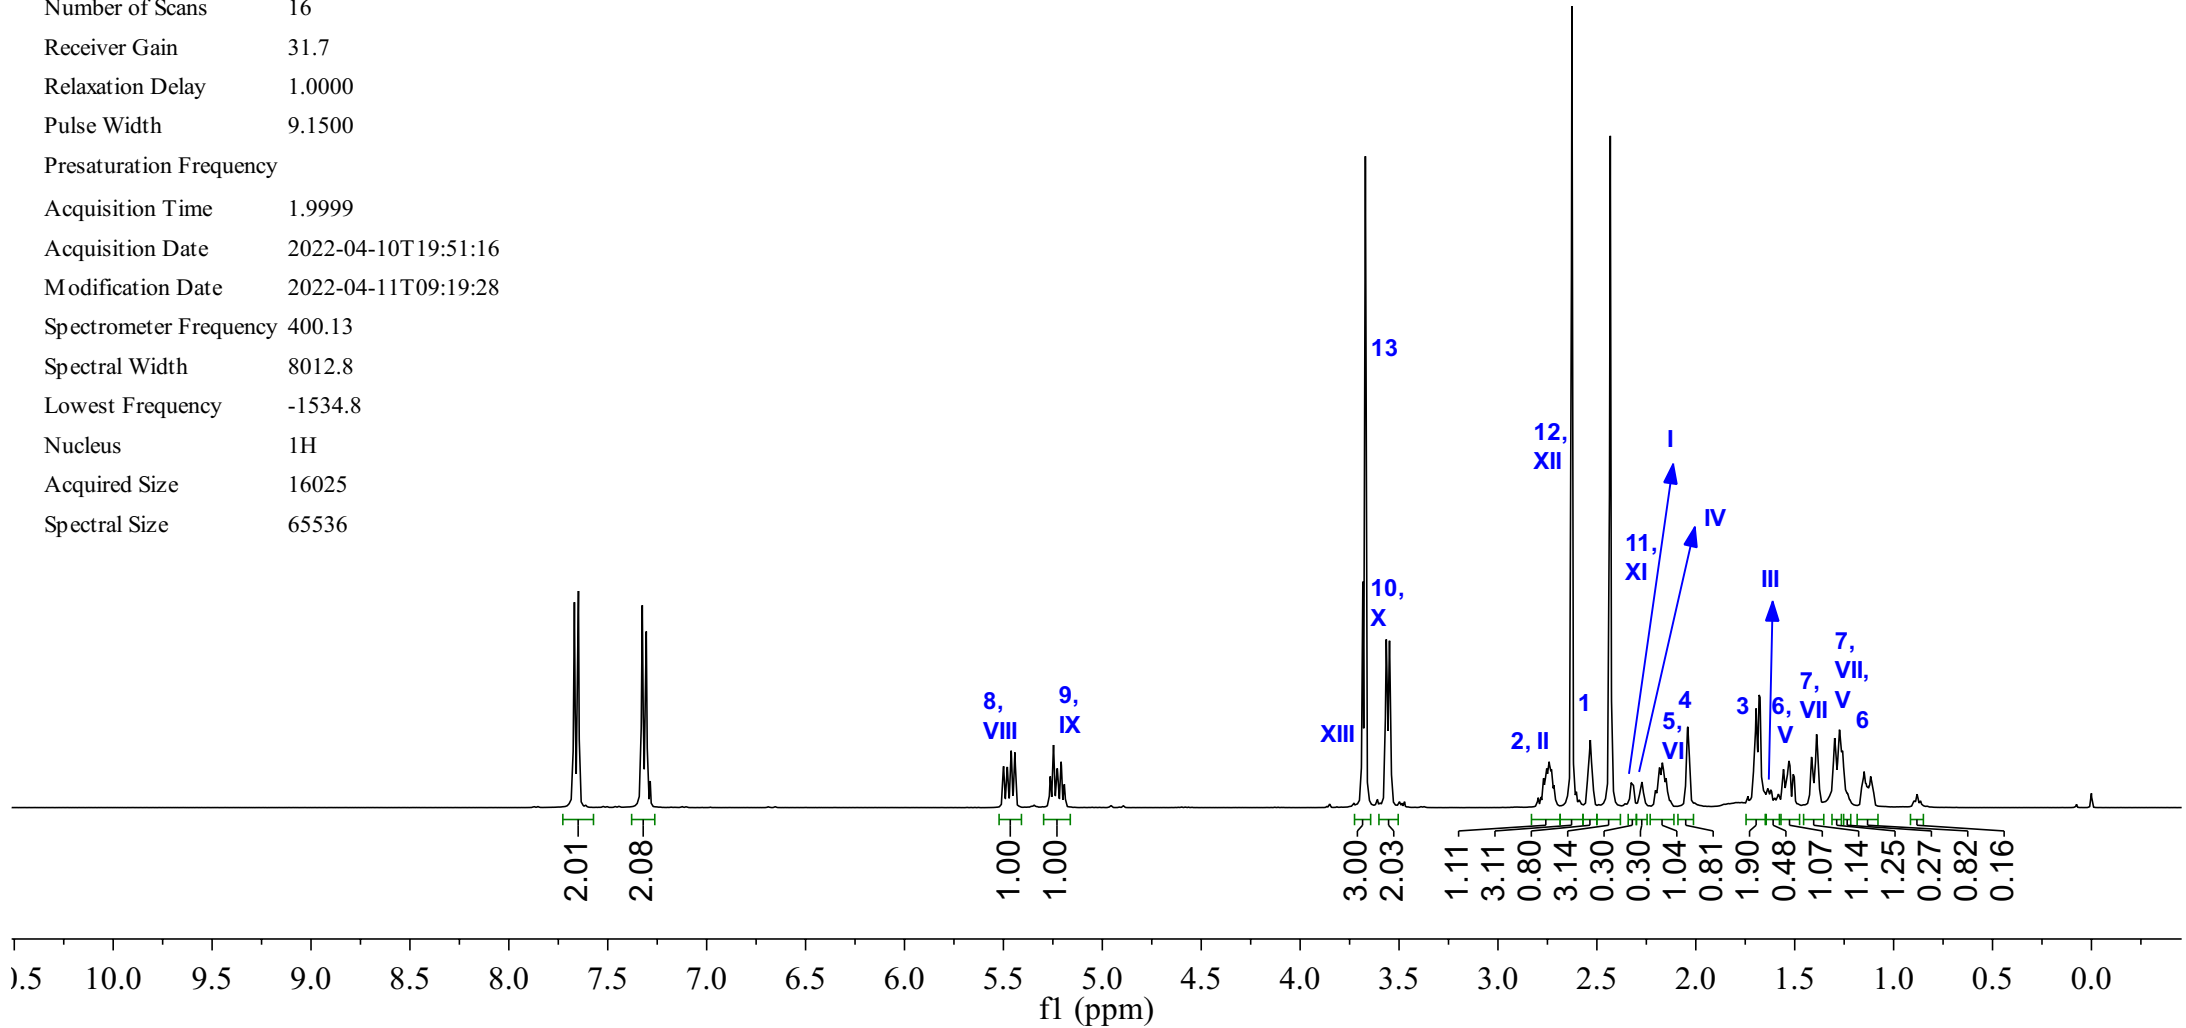

175.3  
175.1143.4  
140.7  
140.4  
134.6  
134.6  
129.7  
127.5  
122.3  
121.952.4  
52.4  
51.7  
51.6  
46.0  
45.8  
45.2  
43.7  
42.9  
40.7  
39.1  
37.5  
37.3  
37.3  
37.1  
34.1  
34.0  
32.8  
32.1  
31.4  
21.6

| Parameter               | Value                  |
|-------------------------|------------------------|
| Title                   | YM-20220406-2-4.13.fid |
| Comment                 |                        |
| Origin                  | Bruker BioSpin GmbH    |
| Owner                   | nmr                    |
| Site                    |                        |
| Instrument              | spect                  |
| Solvent                 | CDC13                  |
| Temperature             | 296.7                  |
| Pulse Sequence          | zgpg30                 |
| Experiment              | 1D                     |
| Number of Scans         | 96                     |
| Receiver Gain           | 196.4                  |
| Relaxation Delay        | 2.0000                 |
| Pulse Width             | 10.2200                |
| Presaturation Frequency |                        |
| Acquisition Time        | 1.3631                 |
| Acquisition Date        | 2022-04-10T19:58:59    |
| Modification Date       | 2022-04-11T09:19:27    |
| Spectrometer Frequency  | 100.62                 |
| Spectral Width          | 24038.5                |
| Lowest Frequency        | -1950.1                |
| Nucleus                 | 13C                    |
| Acquired Size           | 32768                  |
| Spectral Size           | 65536                  |

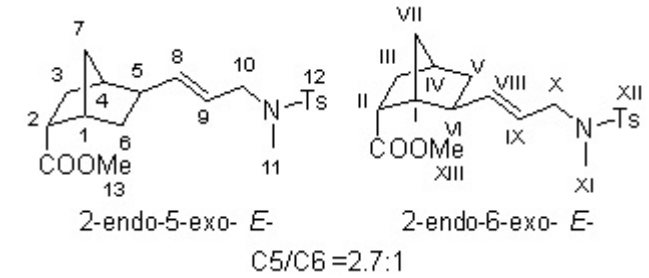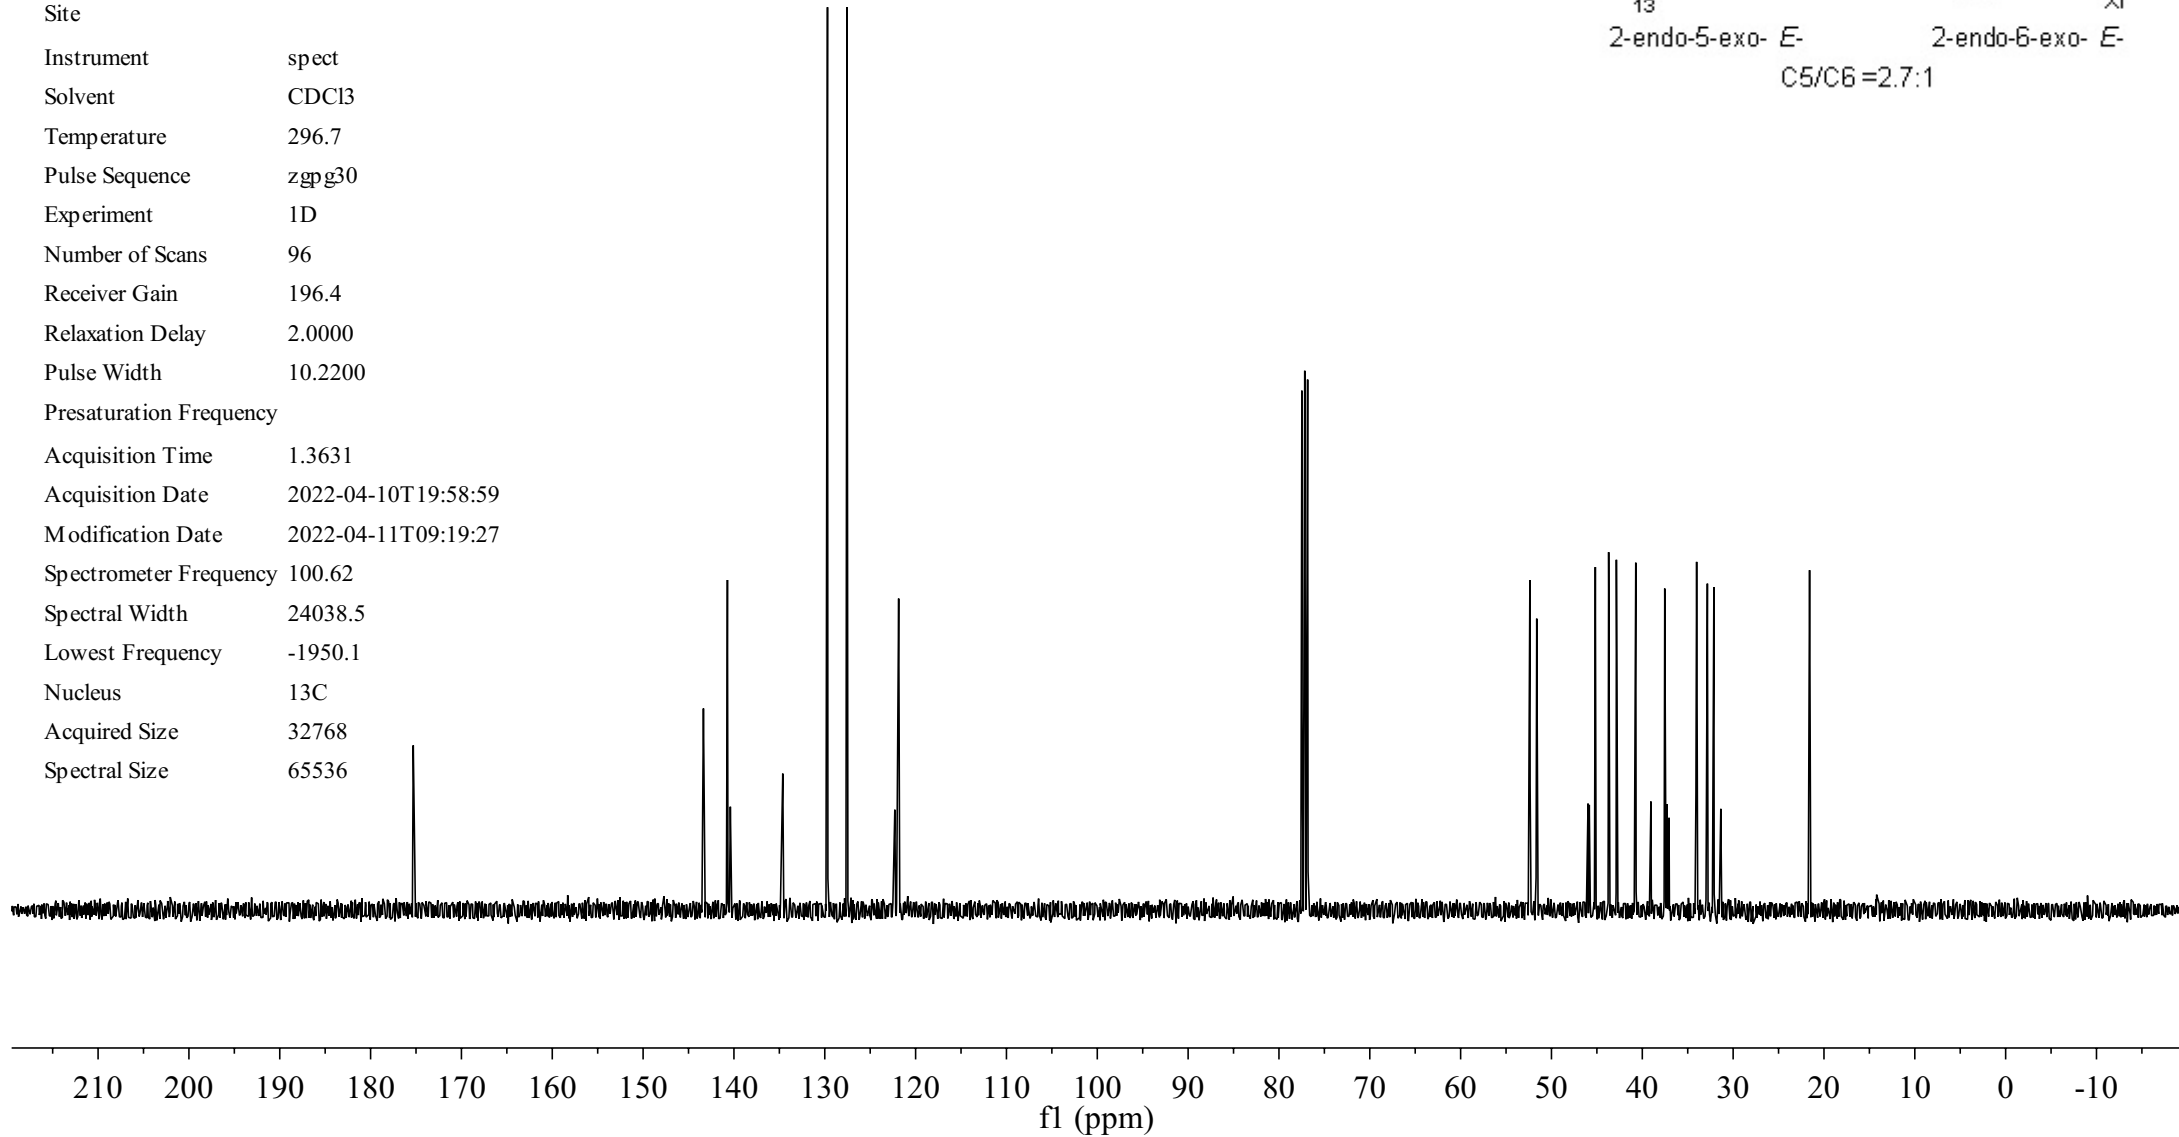

YM-20220406-2-4.14.fid

| Parameter               | Value                  |
|-------------------------|------------------------|
| Title                   | YM-20220406-2-4.14.fid |
| Comment                 |                        |
| Origin                  | Bruker BioSpin GmbH    |
| Owner                   | nmr                    |
| Site                    |                        |
| Instrument              | spect                  |
| Solvent                 | CDC13                  |
| Temperature             | 296.7                  |
| Pulse Sequence          | deptsp 135             |
| Experiment              | DEPT-135               |
| Number of Scans         | 64                     |
| Receiver Gain           | 196.4                  |
| Relaxation Delay        | 2.0000                 |
| Pulse Width             | 10.2200                |
| Presaturation Frequency |                        |
| Acquisition Time        | 2.0316                 |
| Acquisition Date        | 2022-04-10T20:05:42    |
| Modification Date       | 2022-04-11T09:19:26    |
| Spectrometer Frequency  | 100.62                 |
| Spectral Width          | 16129.0                |
| Lowest Frequency        | -16.0                  |
| Nucleus                 | 13C                    |
| Acquired Size           | 32768                  |
| Spectral Size           | 65536                  |

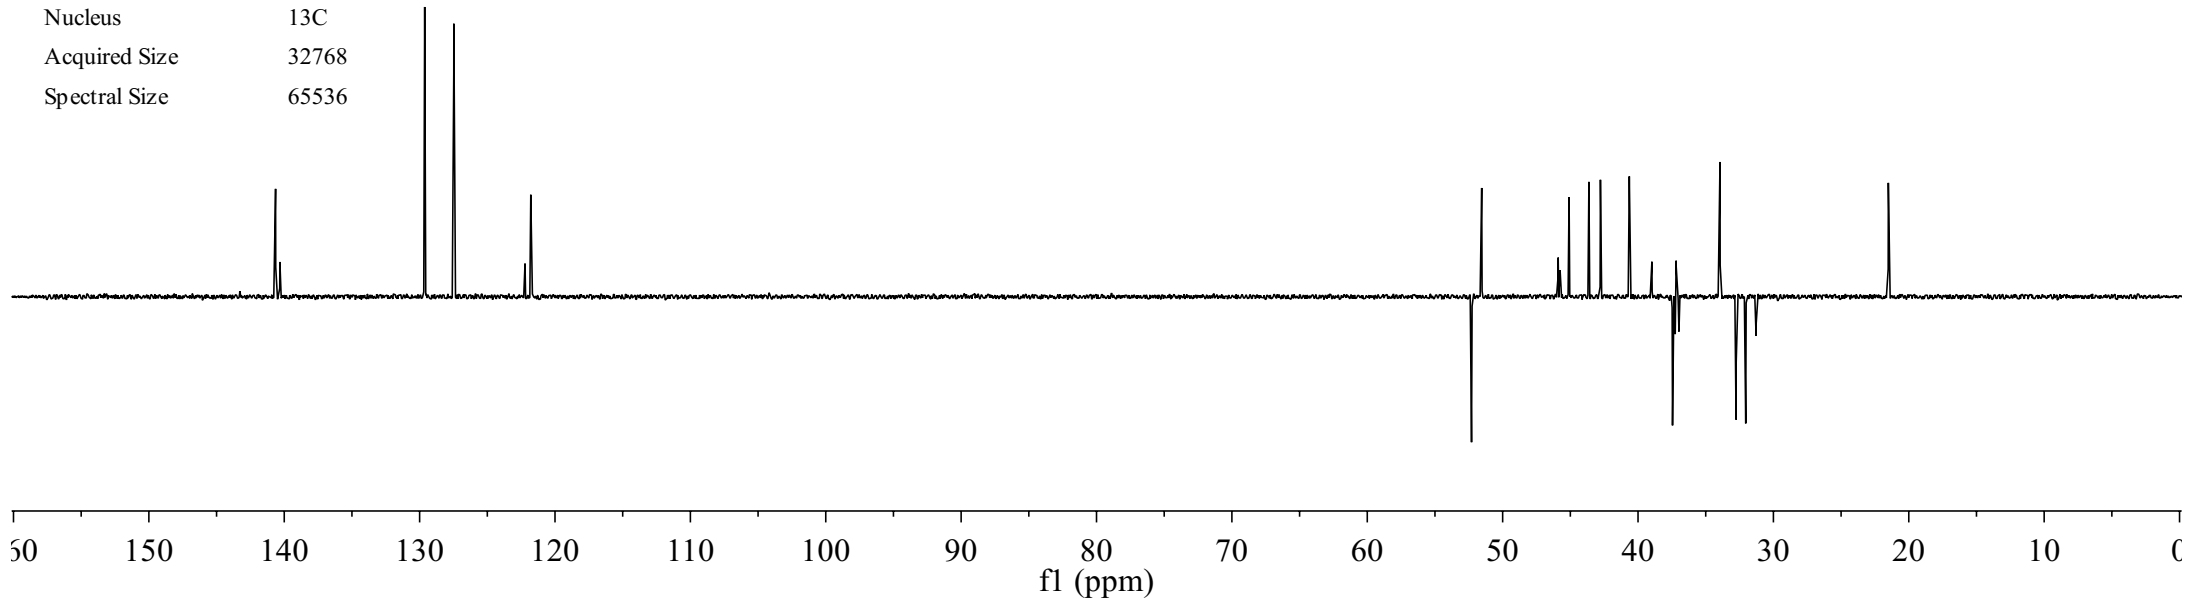

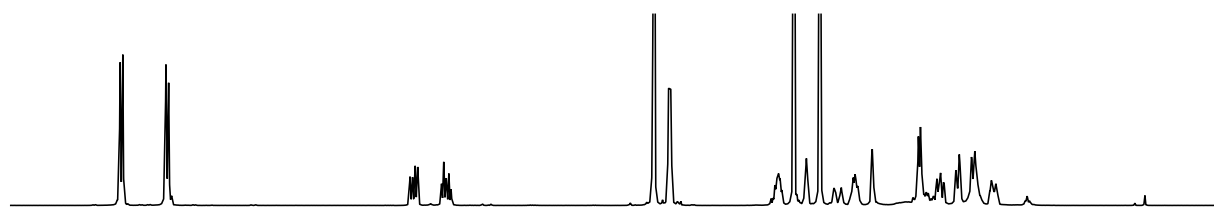

YM-20220406-2-4.15.ser

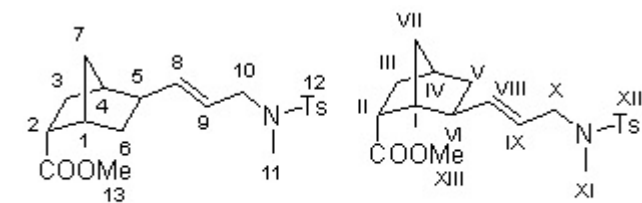

2-endo-5-exo- *E*-  
2-endo-6-exo- *E*-  
C5/C6 = 2.7:1

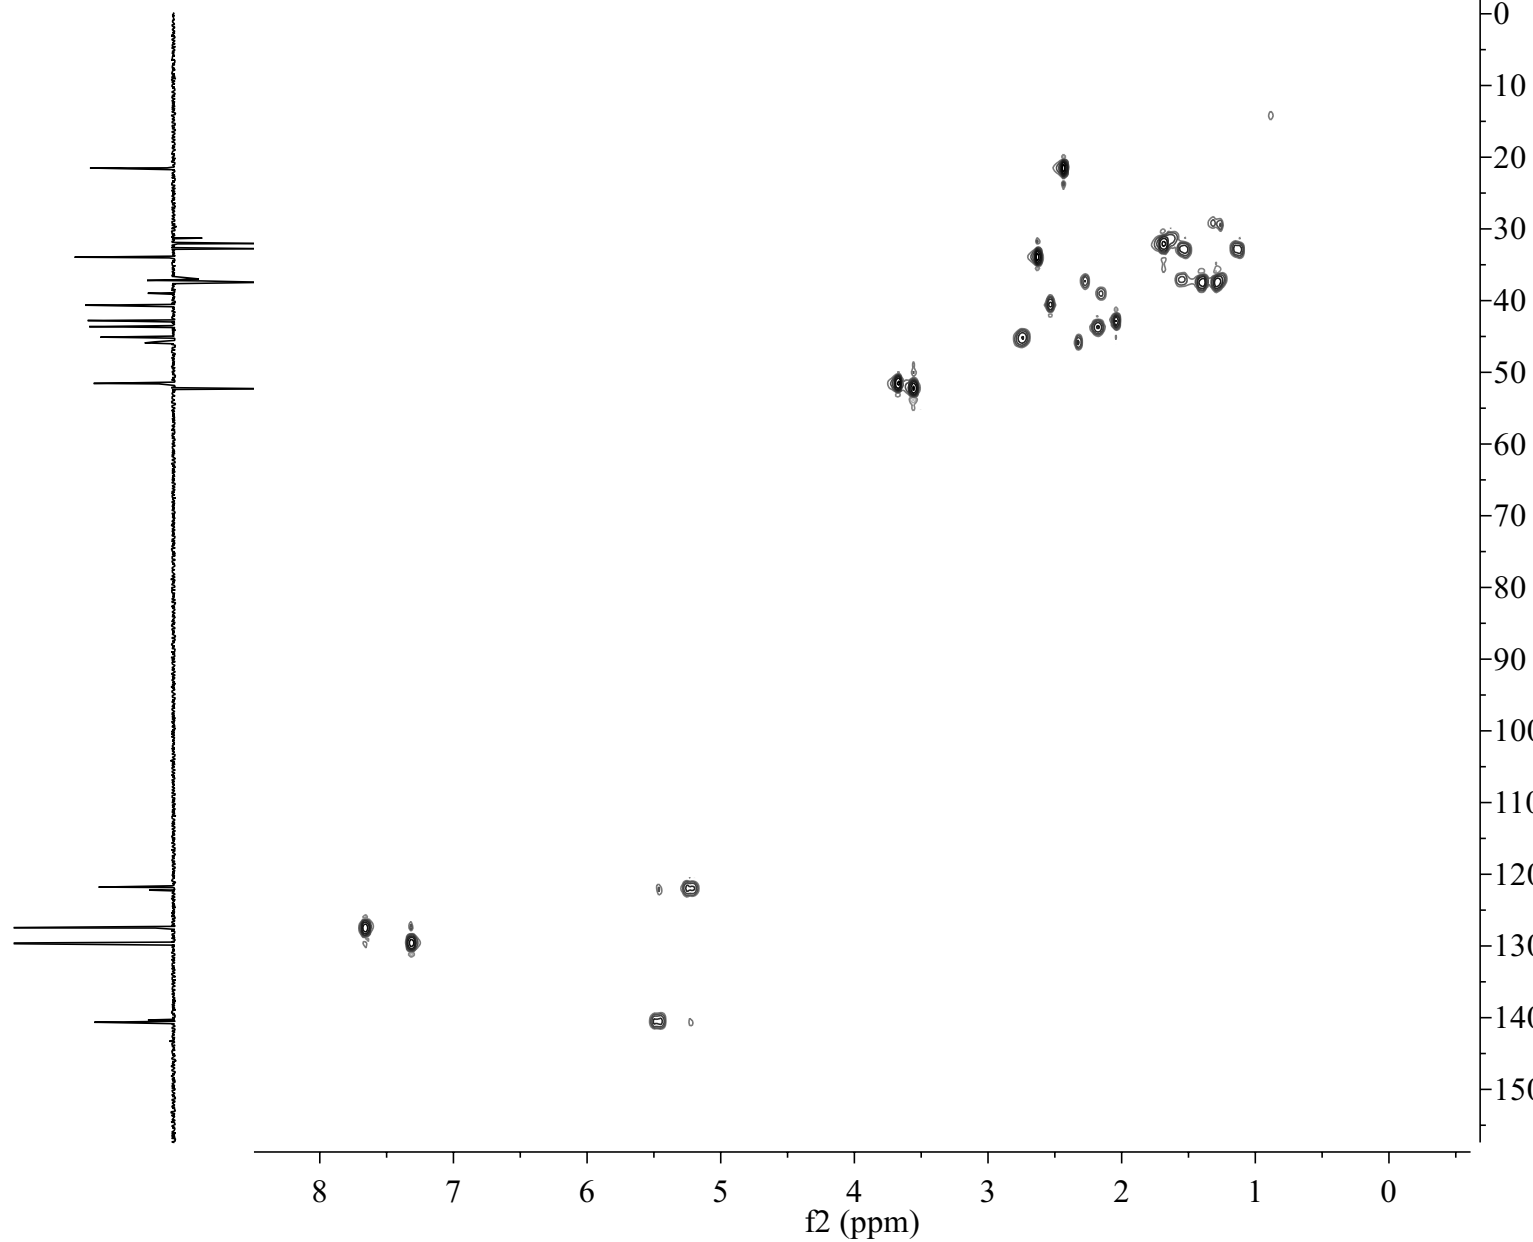

| Parameter               | Value                  |
|-------------------------|------------------------|
| Title                   | YM-20220406-2-4.15.ser |
| Comment                 |                        |
| Origin                  | Bruker BioSpin GmbH    |
| Owner                   | nmr                    |
| Site                    |                        |
| Instrument              | spect                  |
| Solvent                 | CDCl3                  |
| Temperature             | 296.8                  |
| Pulse Sequence          | hsqcetgp               |
| Experiment              | HSQC                   |
| Number of Scans         | 2                      |
| Receiver Gain           | 196.4                  |
| Relaxation Delay        | 1.4582                 |
| Pulse Width             | 9.1500                 |
| Presaturation Frequency |                        |
| Acquisition Time        | 0.1403                 |
| Acquisition Date        | 2022-04-10T20:11:17    |
| Modification Date       | 2022-04-11T09:19:29    |
| Spectrometer Frequency  | (400.13, 100.62)       |
| Spectral Width          | (3649.6, 16666.7)      |
| Lowest Frequency        | (-251.5, -829.1)       |
| Nucleus                 | (1H, 13C)              |
| Acquired Size           | (512, 256)             |
| Spectral Size           | (512, 512)             |

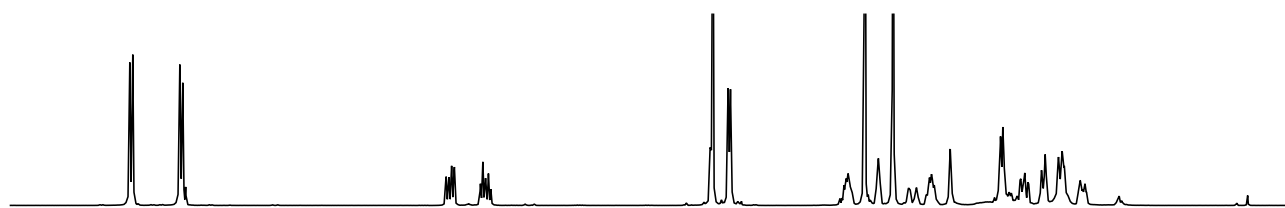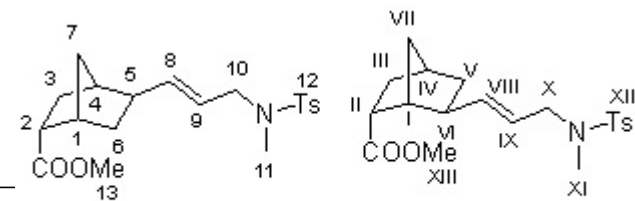

2-endo-5-exo- *E*-  
2-endo-6-exo- *E*-  
C5/C6 = 2.7:1

YM-20220406-2-4.12.ser

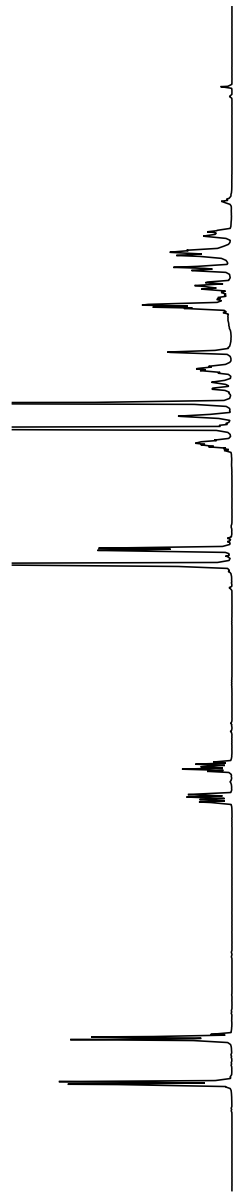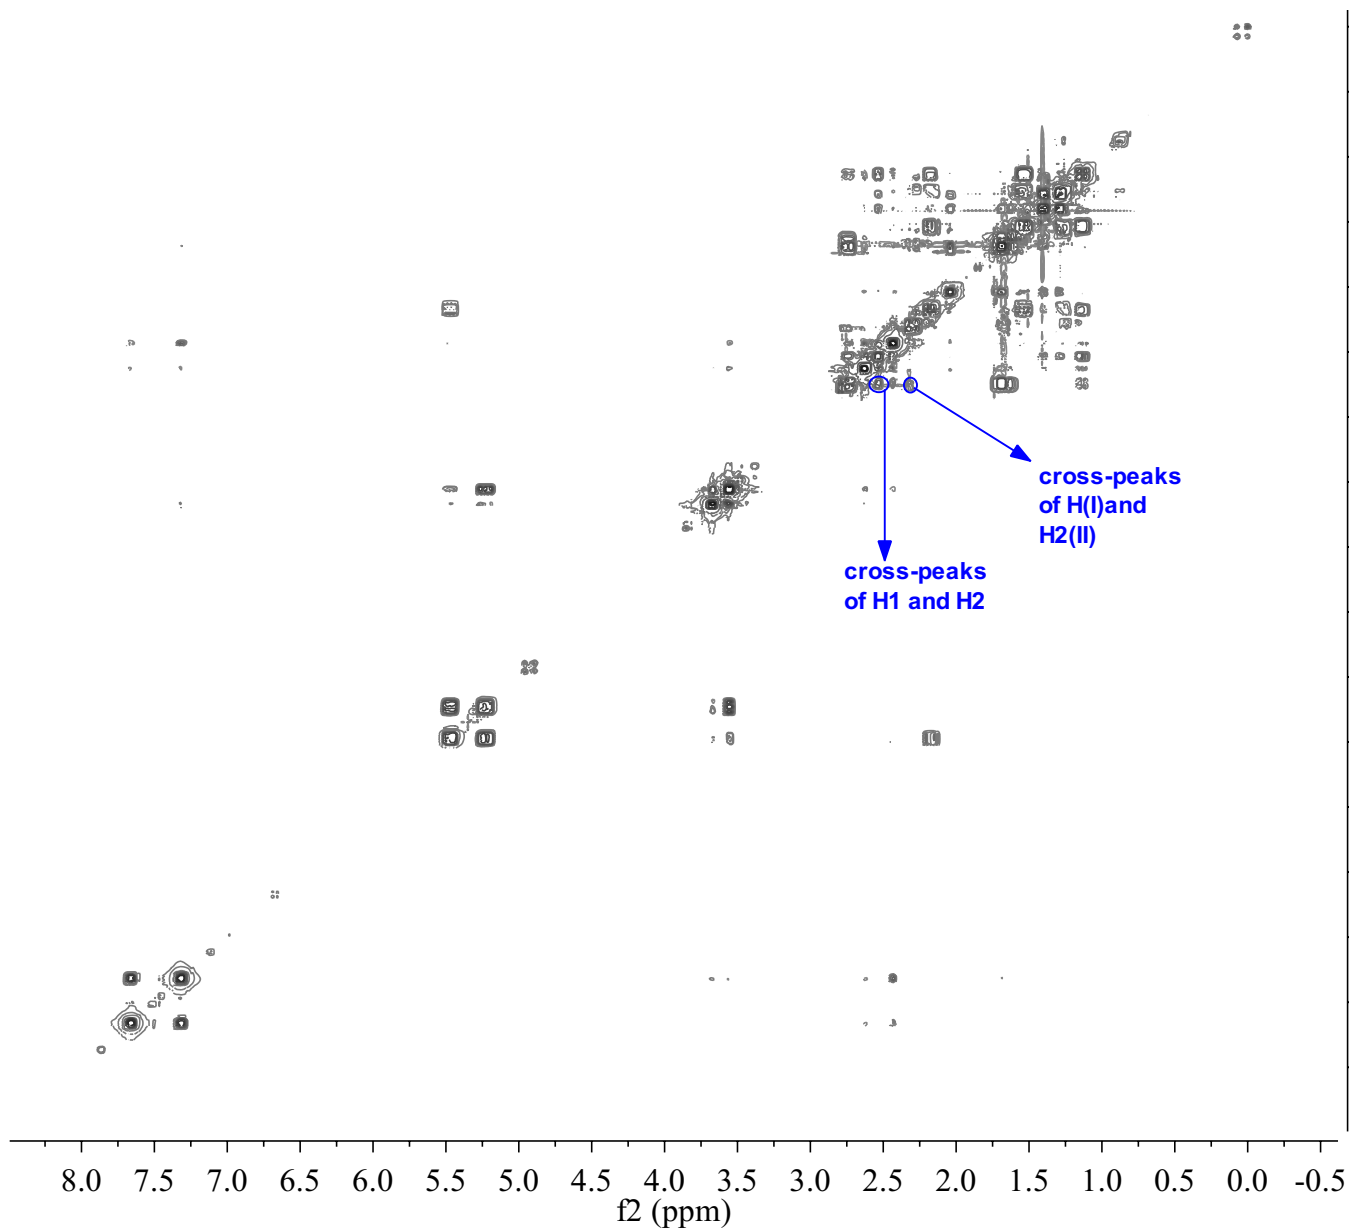

| Parameter               | Value                  |
|-------------------------|------------------------|
| Title                   | YM-20220406-2-4.12.ser |
| Comment                 |                        |
| Origin                  | Bruker BioSpin GmbH    |
| Owner                   | nmr                    |
| Site                    |                        |
| Instrument              | spect                  |
| Solvent                 | CDC13                  |
| Temperature             | 296.4                  |
| Pulse Sequence          | cosypppqf              |
| Experiment              | COSY                   |
| Number of Scans         | 1                      |
| Receiver Gain           | 19.6                   |
| Relaxation Delay        | 1.9111                 |
| Pulse Width             | 9.1500                 |
| Presaturation Frequency |                        |
| Acquisition Time        | 0.2806                 |
| Acquisition Date        | 2022-04-10T19:52:28    |
| Modification Date       | 2022-04-11T09:19:27    |
| Spectrometer Frequency  | (400.13, 400.13)       |
| Spectral Width          | (3649.6, 3649.6)       |
| Lowest Frequency        | (-251.5, -251.5)       |
| Nucleus                 | (1H, 1H)               |
| Acquired Size           | (1024, 128)            |
| Spectral Size           | (1024, 1024)           |



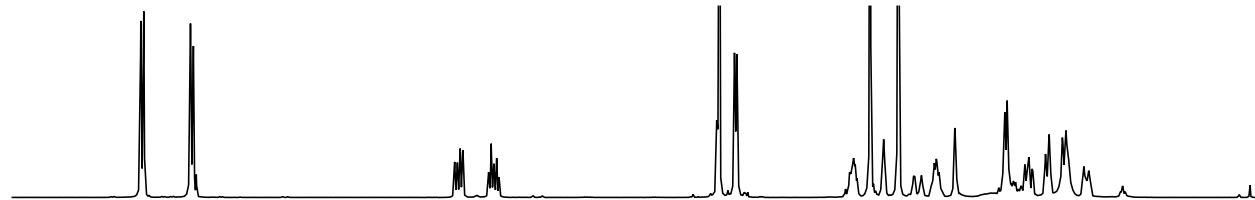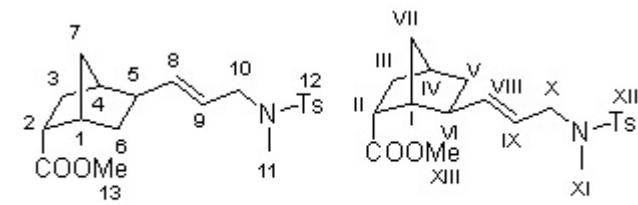

YM-20220406-2-4.17.ser

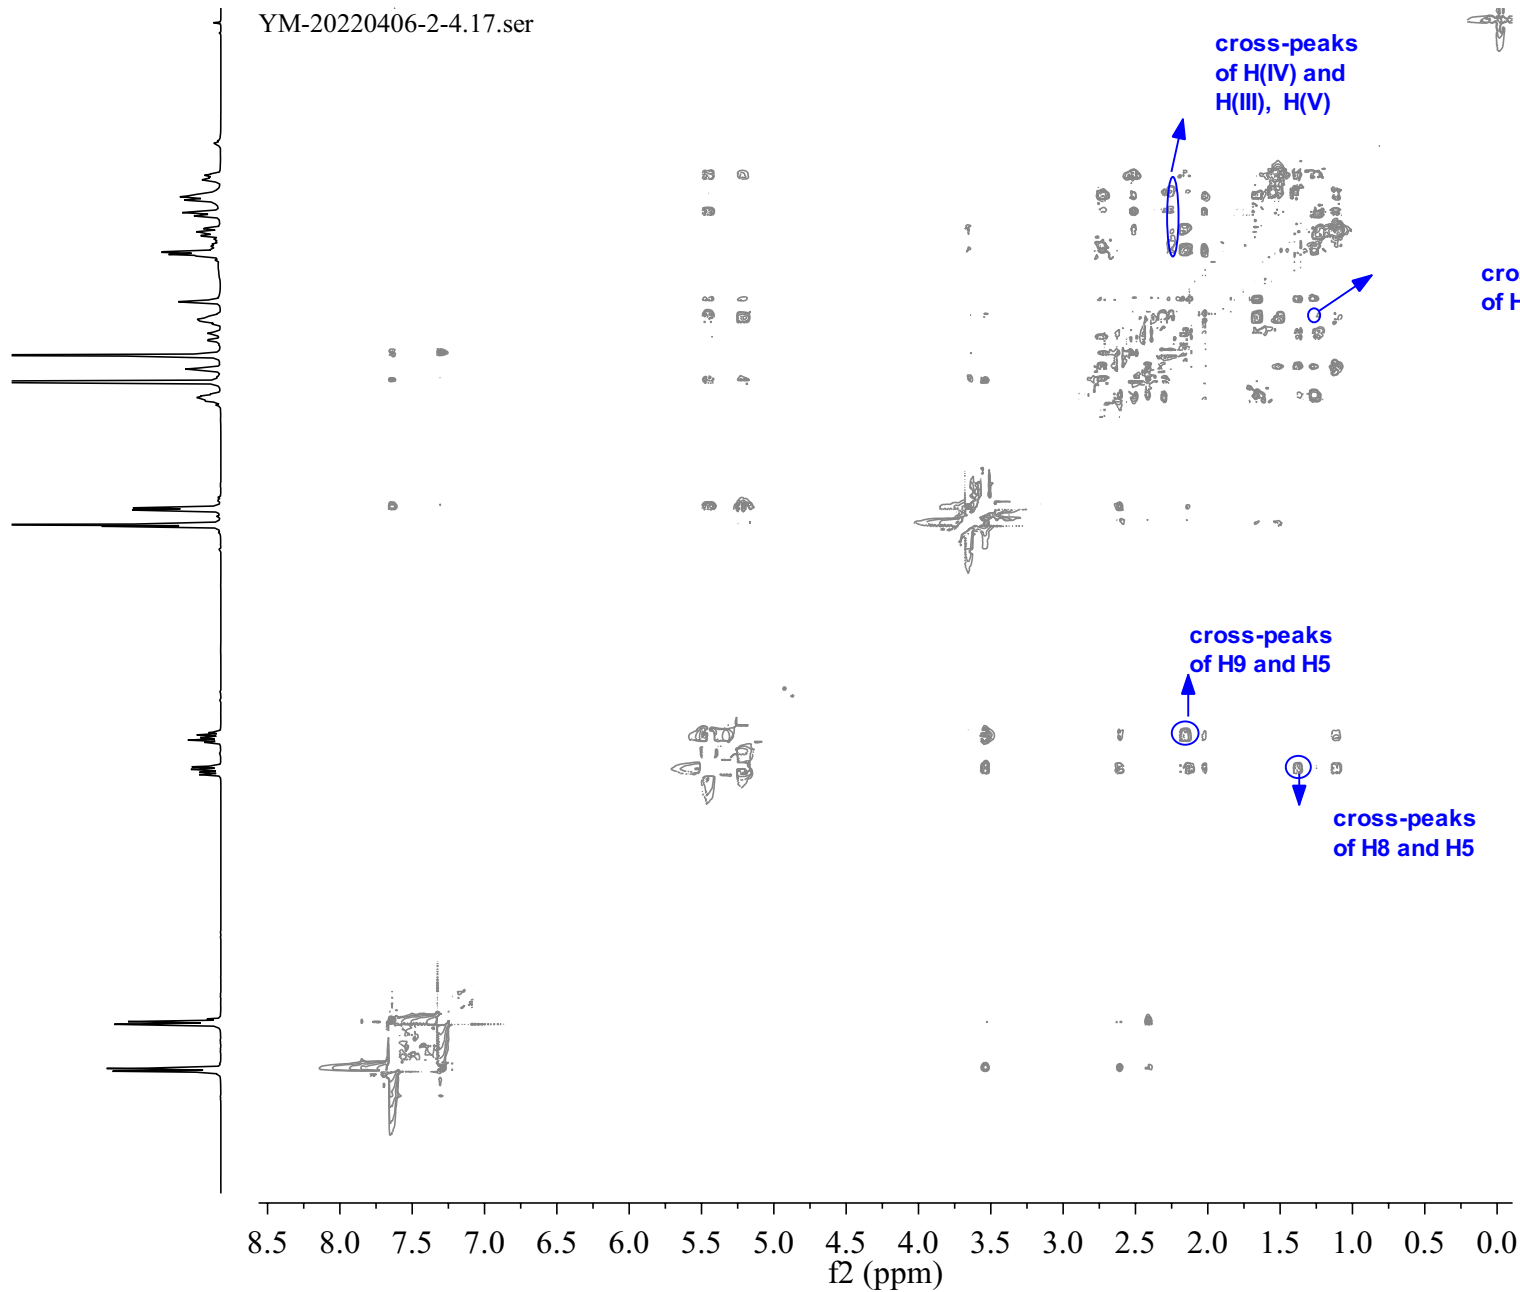

0  
1  
2  
3  
4  
5  
6  
7  
8

C5/C6 = 2.7:1

cross-peaks of H5 and H7

cross-peaks of H(IV) and H(III), H(V)

cross-peaks of H9 and H5

cross-peaks of H8 and H5

| Parameter               | Value                  |
|-------------------------|------------------------|
| Title                   | YM-20220406-2-4.17.ser |
| Comment                 |                        |
| Origin                  | Bruker BioSp in GmbH   |
| Owner                   | nmr                    |
| Site                    |                        |
| Instrument              | spect                  |
| Solvent                 | CDCI3                  |
| Temperature             | 298.1                  |
| Pulse Sequence          | noesy gp ppp           |
| Experiment              | NOESY                  |
| Number of Scans         | 4                      |
| Receiver Gain           | 17.4                   |
| Relaxation Delay        | 1.9611                 |
| Pulse Width             | 9.3800                 |
| Presaturation Frequency |                        |
| Acquisition Time        | 0.2949                 |
| Acquisition Date        | 2022-04-12T23:10:18    |
| Modification Date       | 2022-04-13T09:52:58    |
| Spectrometer Frequency  | (400.13, 400.13)       |
| Spectral Width          | (3472.2, 3472.2)       |
| Lowest Frequency        | (-46.2, -46.2)         |
| Nucleus                 | (1H, 1H)               |
| Acquired Size           | (1024, 256)            |
| Spectral Size           | (1024, 1024)           |
